# Supplementary material for: Revisiting the Synthesis of Functionally Substituted 1,4-Dihydrobenzo[e][1,2,4]triazines
Source: MDPI journal article supplement (doi:10.3390/molecules27082575), 2022-04-15

## Supporting Information for

### Revisiting the synthesis of functionally substituted 1,4-dihydrobenzo[*e*][1,2,4]triazines

Margarita A. Epishina, Alexander S. Kulikov, Leonid L. Fershtat\*

Laboratory of Nitrogen Compounds, N.D. Zelinsky Institute of Organic Chemistry, Russian Academy of Sciences, Leninsky prosp., 47, 119991 Moscow, Russian Federation; fershtat@ioc.ac.ru (L.L.F.)

## Table of Contents

|                                 |    |
|---------------------------------|----|
| S1. Thermal behavior .....      | 2  |
| S2. Crystallographic data ..... | 9  |
| S3. EPR spectra .....           | 38 |
| S4. NMR and HRMS spectra .....  | 38 |

## S1. Thermal behavior

Thermal behavior of the synthesized compounds was studied using differential scanning calorimeter Netzsch DSC 204 HP. The measurements were performed under normal pressure (0.1 MPa) in nitrogen flow 150 ml min<sup>-1</sup>. The samples with mass near 1.0 mg were placed in closed aluminum crucibles with pierced lids and heated up to 450 °C at the linearly heating rate 5 K·min<sup>-1</sup>.

### DSC curve for compound 5a

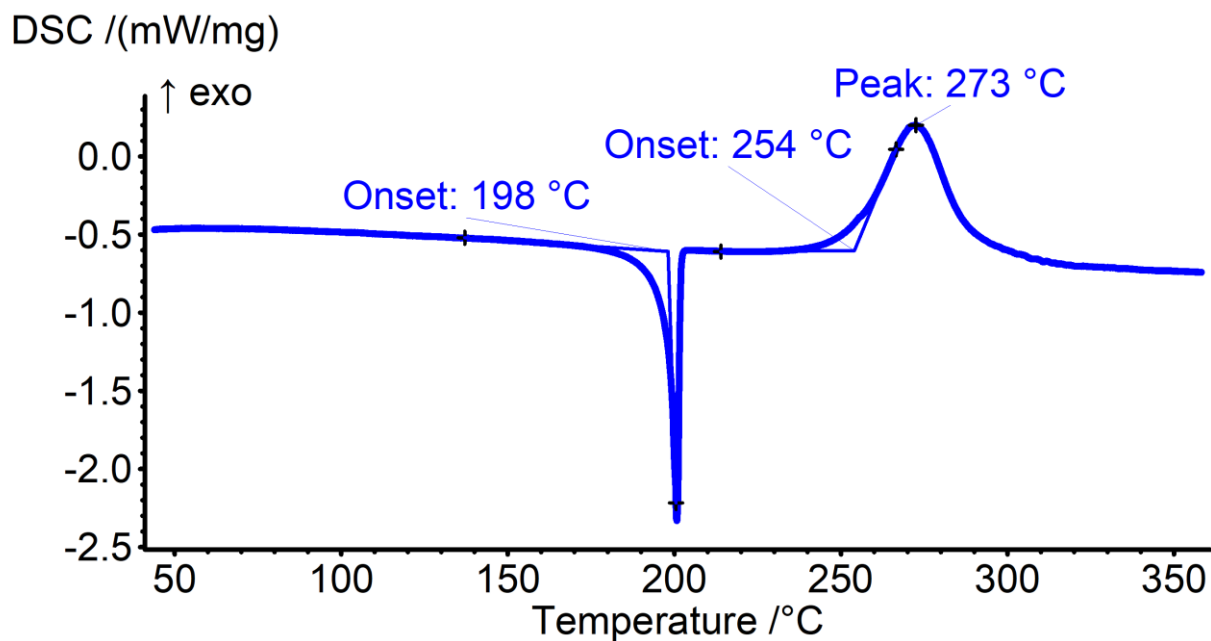

### DSC curve for compound 5b

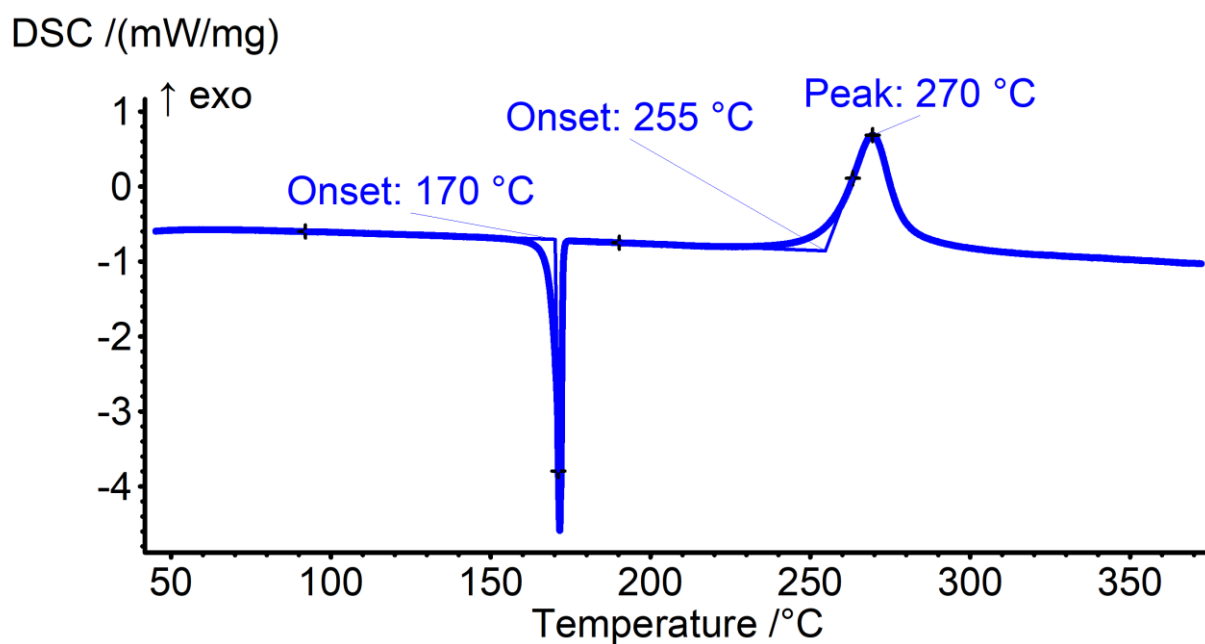

### DSC curve for compound 5c

DSC /(mW/mg)

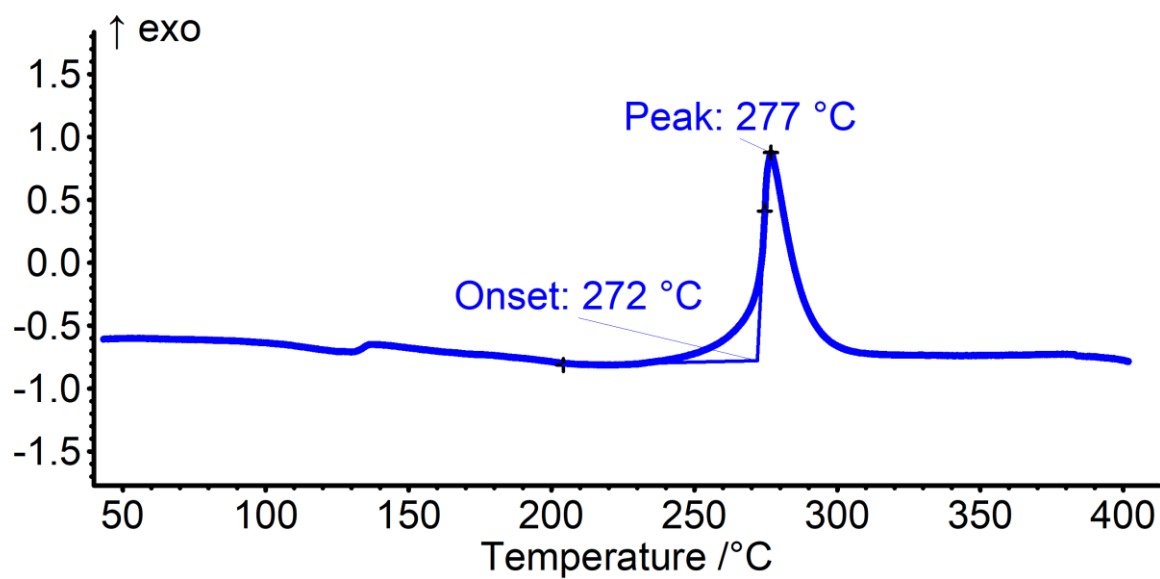

1082 2022-03-04 16:16 User: igor

### DSC curve for compound 5d

DSC /(mW/mg)

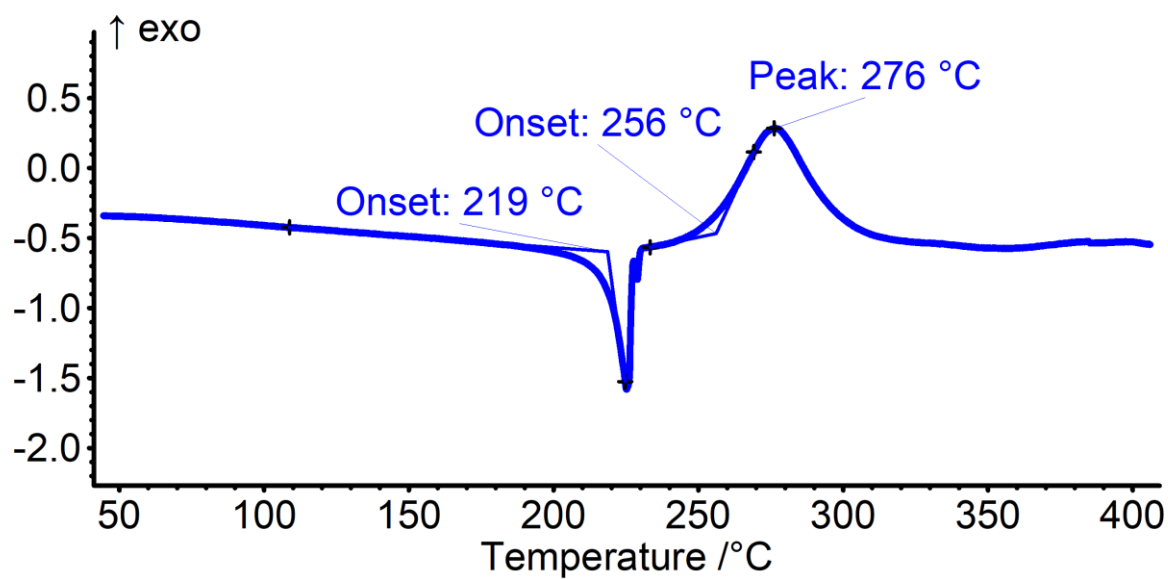

1079 2022-03-04 16:14 User: igor

### DSC curve for compound 5e

DSC /(mW/mg)

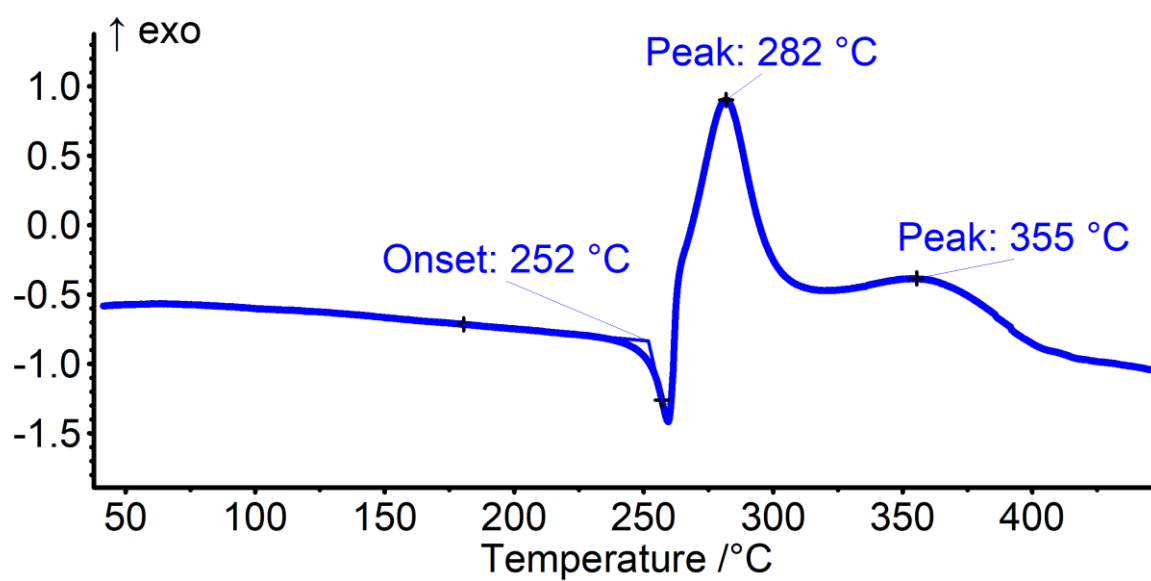

### DSC curve for compound 5f

DSC /(mW/mg)

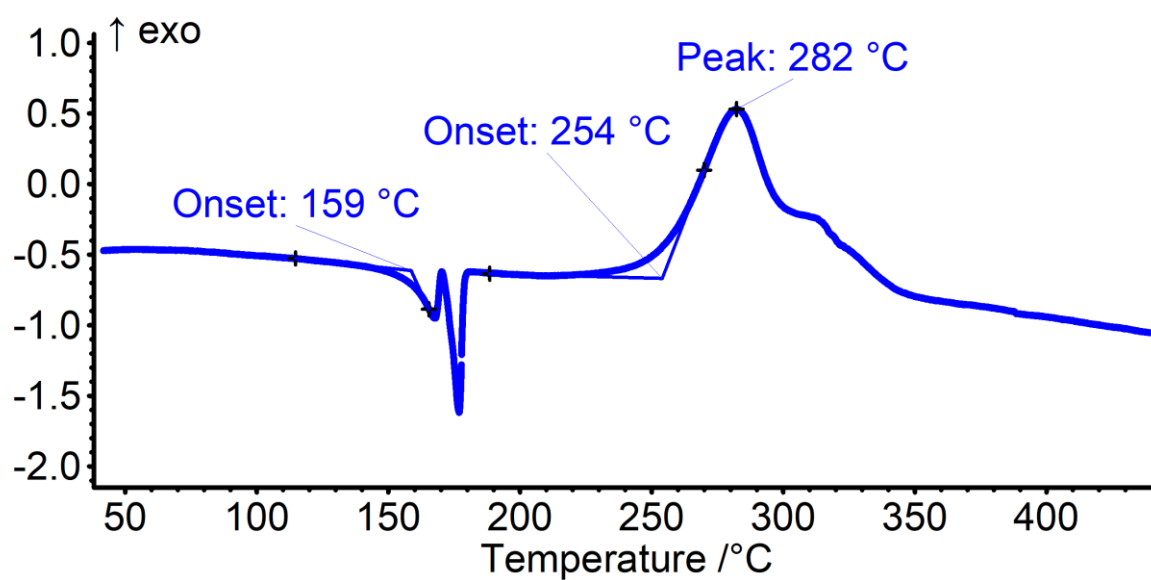

### DSC curve for compound 5g

DSC /(mW/mg)

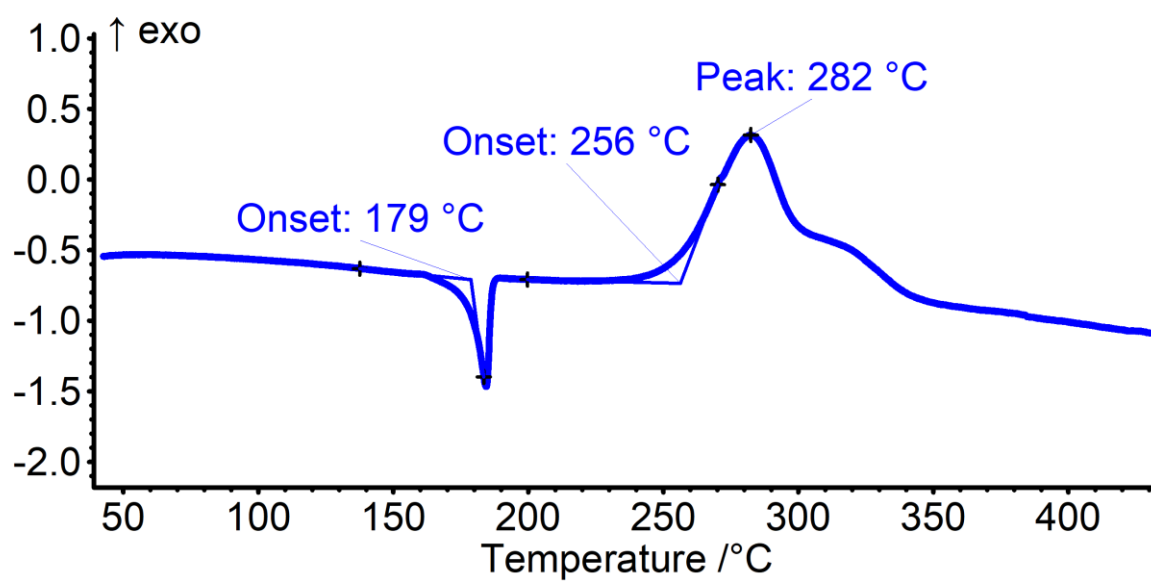

1109 2022-03-04 16:31 User: igor

### DSC curve for compound 5i

DSC /(mW/mg)

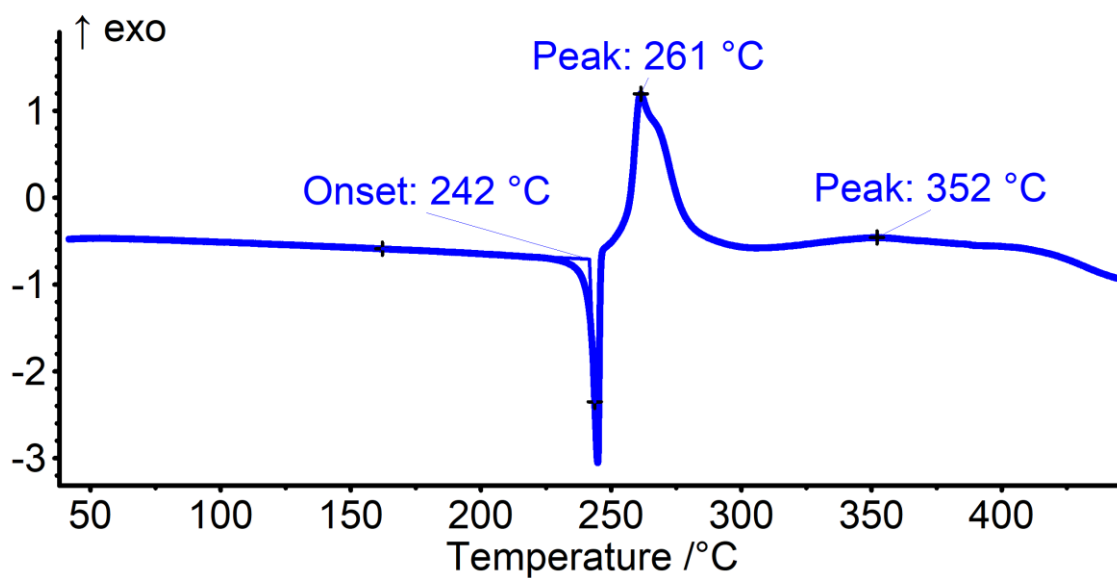

1103 2022-03-04 16:25 User: igor

### DSC curve for compound 5j

DSC /(mW/mg)

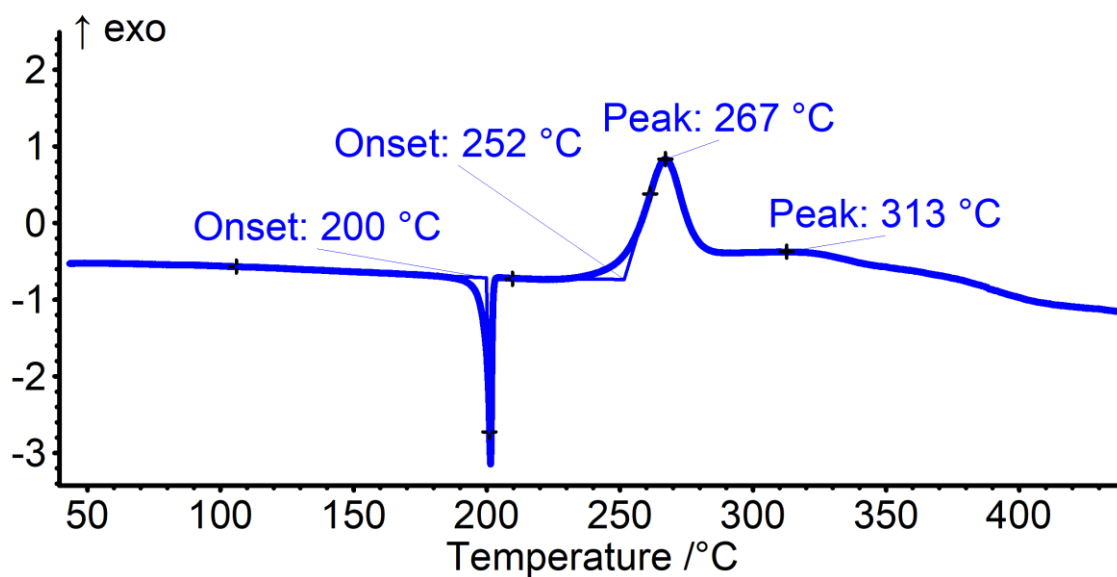

1101 2022-03-04 16:24 User: igor

### DSC curve for compound 5k

DSC /(mW/mg)

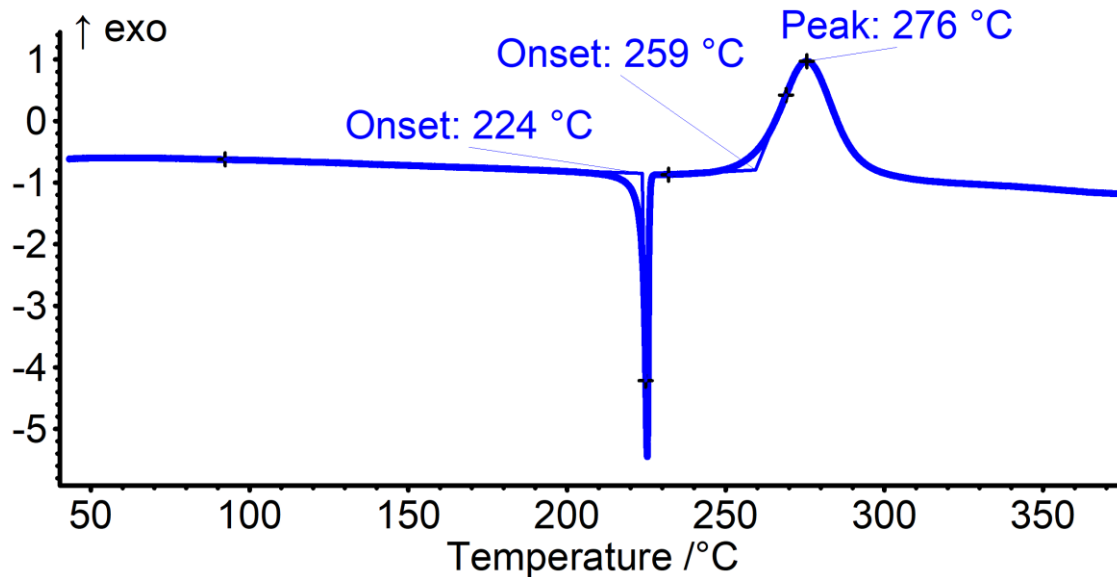

1104-B 2022-03-04 16:26 User: igor

### DSC curve for compound 6k

DSC /(mW/mg)

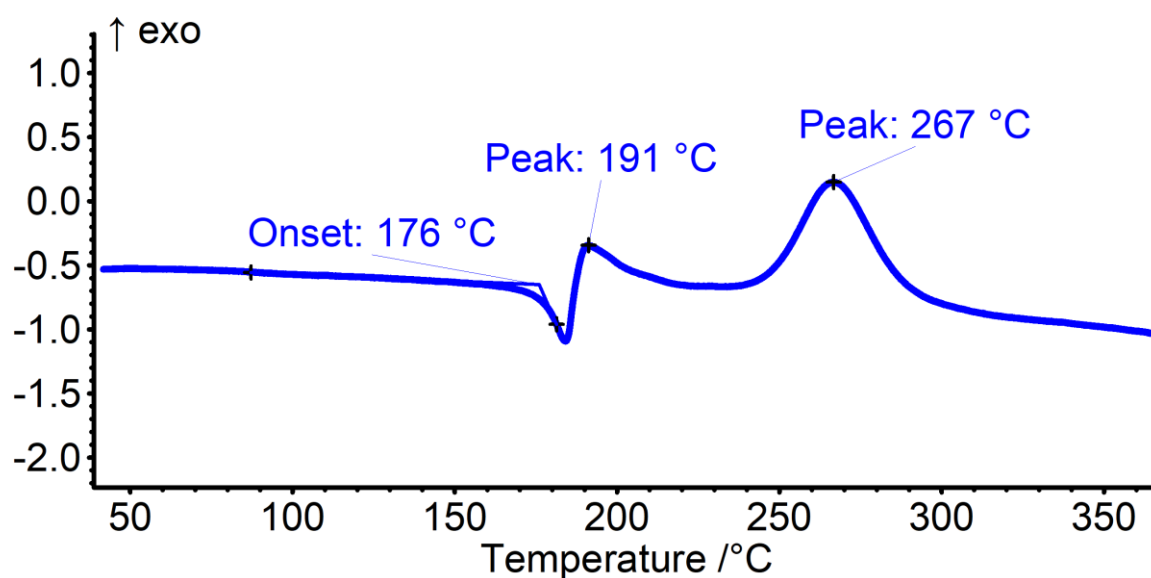

### DSC curve for compound 6l

DSC /(mW/mg)

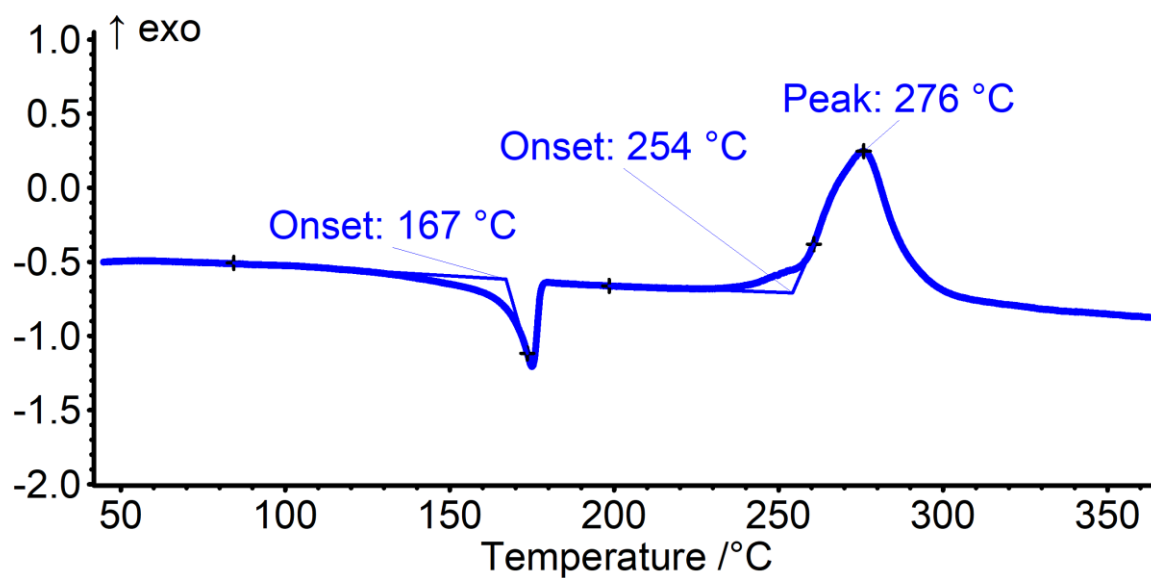

## DSC curve for compound 7

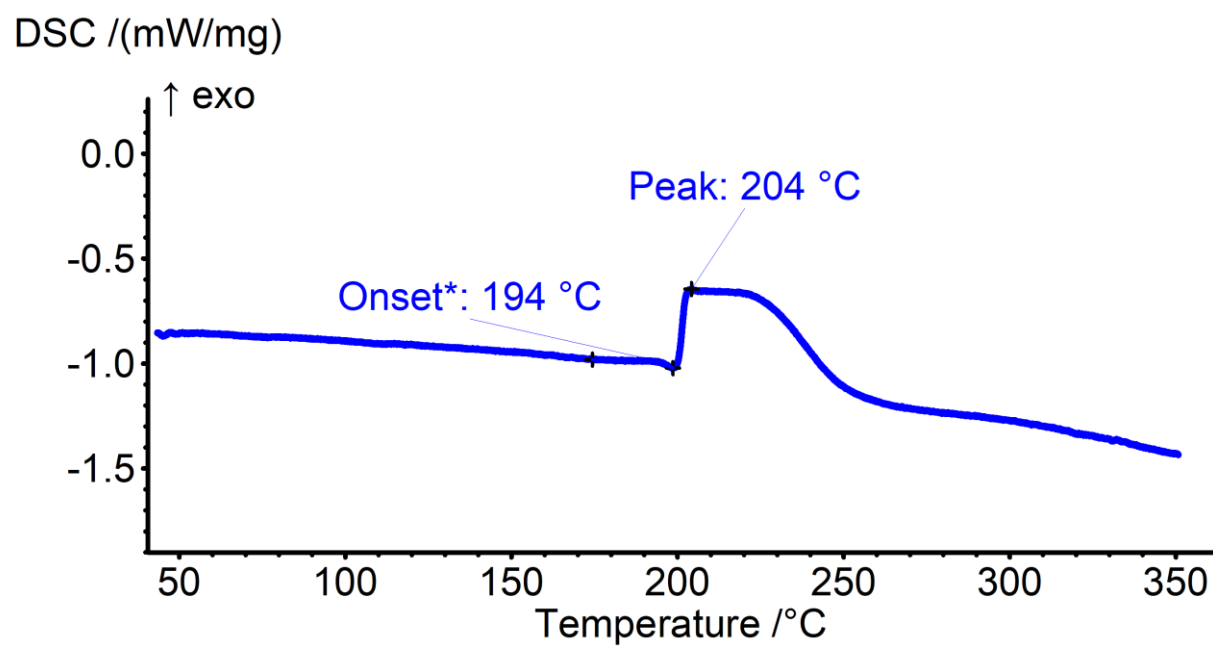



## S2. Crystallographic data

Table S1. Crystal data and structure refinement for **7**.

|                                   |                                                                                              |          |
|-----------------------------------|----------------------------------------------------------------------------------------------|----------|
| Identification code               | <b>7</b>                                                                                     |          |
| Empirical formula                 | C <sub>32</sub> H <sub>34</sub> Cl <sub>4</sub> N <sub>6</sub> O <sub>3</sub> S <sub>3</sub> |          |
| Formula weight                    | 788.63                                                                                       |          |
| Temperature                       | 100.00(10) K                                                                                 |          |
| Wavelength                        | 1.54184 Å                                                                                    |          |
| Crystal system                    | Orthorhombic                                                                                 |          |
| Space group                       | P2 <sub>1</sub> 2 <sub>1</sub> 2 <sub>1</sub>                                                |          |
| Unit cell dimensions              | a = 9.19173(6) Å                                                                             | α = 90°. |
|                                   | b = 18.42596(16) Å                                                                           | β = 90°. |
|                                   | c = 41.9864(3) Å                                                                             | γ = 90°. |
| Volume                            | 7111.09(9) Å <sup>3</sup>                                                                    |          |
| Z                                 | 8                                                                                            |          |
| Density (calculated)              | 1.473 g/cm <sup>3</sup>                                                                      |          |
| Absorption coefficient            | 5.031 mm <sup>-1</sup>                                                                       |          |
| F(000)                            | 3264                                                                                         |          |
| Crystal size                      | 0.132 x 0.111 x 0.032 mm <sup>3</sup>                                                        |          |
| Theta range for data collection   | 2.105 to 80.017°.                                                                            |          |
| Index ranges                      | -9 ≤ h ≤ 11, -23 ≤ k ≤ 23, -53 ≤ l ≤ 53                                                      |          |
| Reflections collected             | 95880                                                                                        |          |
| Independent reflections           | 15320 [R(int) = 0.0460]                                                                      |          |
| Observed reflections              | 14743                                                                                        |          |
| Completeness to theta = 67.684°   | 100.0 %                                                                                      |          |
| Absorption correction             | Semi-empirical from equivalents                                                              |          |
| Max. and min. transmission        | 1.00000 and 0.81599                                                                          |          |
| Refinement method                 | Full-matrix least-squares on F <sup>2</sup>                                                  |          |
| Data / restraints / parameters    | 15320 / 18 / 912                                                                             |          |
| Goodness-of-fit on F <sup>2</sup> | 1.056                                                                                        |          |
| Final R indices [I > 2σ(I)]       | R1 = 0.0373, wR2 = 0.0983                                                                    |          |
| R indices (all data)              | R1 = 0.0386, wR2 = 0.0992                                                                    |          |
| Absolute structure parameter      | 0.007(3)                                                                                     |          |
| Largest diff. peak and hole       | 0.327 and -0.426 e.Å <sup>-3</sup>                                                           |          |

Table S2. Atomic coordinates ( $\times 10^4$ ) and equivalent isotropic displacement parameters ( $\text{\AA}^2 \times 10^3$ ) for **7**.  $U(\text{eq})$  is defined as one third of the trace of the orthogonalized  $U^{ij}$  tensor.

|        | x        | y        | z       | $U(\text{eq})$ |
|--------|----------|----------|---------|----------------|
| Cl(1B) | 3423(1)  | 3960(1)  | 5209(1) | 31(1)          |
| Cl(3B) | 12643(1) | 6769(1)  | 7190(1) | 35(1)          |
| Cl(2A) | 10669(1) | 7033(1)  | 7972(1) | 36(1)          |
| S(50)  | 8908(1)  | 3559(1)  | 4788(1) | 29(1)          |
| Cl(1A) | -1246(1) | 3923(1)  | 7371(1) | 38(1)          |
| Cl(3A) | 7261(1)  | 6741(1)  | 5279(1) | 40(1)          |
| Cl(4B) | 5052(1)  | 1904(1)  | 6898(1) | 42(1)          |
| Cl(4A) | 182(1)   | 1895(1)  | 5679(1) | 43(1)          |
| Cl(2B) | 15175(1) | 6808(1)  | 4453(1) | 45(1)          |
| S(55)  | 4658(1)  | 8456(1)  | 7258(1) | 35(1)          |
| S(70)  | 8366(1)  | 4467(1)  | 4052(1) | 45(1)          |
| S(75)  | 4453(1)  | 7932(1)  | 5912(1) | 49(1)          |
| S(65)  | 10076(1) | 8105(1)  | 6801(1) | 41(1)          |
| S(60)  | 8310(2)  | 10060(1) | 6362(1) | 44(1)          |
| O(50)  | 10183(3) | 3795(2)  | 4990(1) | 35(1)          |
| N(12A) | 4523(3)  | 4880(2)  | 6912(1) | 24(1)          |
| N(12B) | 9312(3)  | 4816(2)  | 5630(1) | 25(1)          |
| N(2A)  | 5429(3)  | 5523(2)  | 6518(1) | 26(1)          |
| N(2B)  | 10350(3) | 5478(2)  | 6002(1) | 25(1)          |
| O(55)  | 4822(4)  | 9273(2)  | 7231(1) | 36(1)          |
| N(1A)  | 6156(3)  | 5753(2)  | 6797(1) | 26(1)          |
| N(14B) | 10665(3) | 5224(2)  | 5182(1) | 28(1)          |
| N(14A) | 5934(3)  | 5383(2)  | 7339(1) | 26(1)          |
| N(4B)  | 8515(3)  | 4624(2)  | 6166(1) | 25(1)          |
| N(4A)  | 3681(3)  | 4607(2)  | 6387(1) | 26(1)          |
| O(75)  | 3315(3)  | 8292(2)  | 6114(1) | 46(1)          |
| N(5A)  | 2966(3)  | 4022(2)  | 6553(1) | 25(1)          |
| N(5B)  | 7677(3)  | 4060(2)  | 6019(1) | 28(1)          |
| N(1B)  | 11039(3) | 5654(2)  | 5712(1) | 26(1)          |
| C(13A) | 5570(3)  | 5371(2)  | 7027(1) | 24(1)          |
| O(70)  | 9789(4)  | 4699(2)  | 4196(1) | 58(1)          |
| C(21A) | 5834(3)  | 5826(2)  | 6225(1) | 24(1)          |
| C(7A)  | 969(4)   | 3981(2)  | 6950(1) | 27(1)          |
| C(28A) | 1943(4)  | 3720(2)  | 6030(1) | 28(1)          |
| C(27A) | 2254(4)  | 3531(2)  | 6342(1) | 25(1)          |

|        |          |          |         |       |
|--------|----------|----------|---------|-------|
| C(3A)  | 4480(3)  | 4972(2)  | 6582(1) | 23(1) |
| C(3B)  | 9328(4)  | 4943(2)  | 5959(1) | 24(1) |
| C(6A)  | 2342(4)  | 4202(2)  | 6850(1) | 24(1) |
| C(9B)  | 6020(4)  | 4614(2)  | 5116(1) | 28(1) |
| C(25B) | 10755(4) | 5940(2)  | 6854(1) | 28(1) |
| O(65)  | 8741(4)  | 8458(2)  | 6931(1) | 53(1) |
| C(26A) | 5034(4)  | 5676(2)  | 5950(1) | 25(1) |
| C(15A) | 7058(3)  | 5806(2)  | 7475(1) | 24(1) |
| C(11B) | 7929(4)  | 4613(2)  | 5508(1) | 25(1) |
| C(25A) | 5472(4)  | 5968(2)  | 5661(1) | 28(1) |
| C(23B) | 12528(4) | 6604(2)  | 6546(1) | 29(1) |
| C(29B) | 6467(4)  | 3172(2)  | 6767(1) | 31(1) |
| C(26B) | 10210(4) | 5636(2)  | 6578(1) | 26(1) |
| C(11A) | 3181(3)  | 4655(2)  | 7050(1) | 24(1) |
| C(31A) | 1281(4)  | 2330(2)  | 6250(1) | 33(1) |
| C(16A) | 7702(4)  | 6401(2)  | 7328(1) | 29(1) |
| C(23A) | 7503(4)  | 6556(2)  | 5918(1) | 29(1) |
| C(21B) | 10841(3) | 5805(2)  | 6284(1) | 24(1) |
| C(24B) | 11929(4) | 6411(2)  | 6837(1) | 27(1) |
| C(28B) | 7064(4)  | 3684(2)  | 6562(1) | 28(1) |
| C(27B) | 7055(4)  | 3567(2)  | 6234(1) | 26(1) |
| C(10A) | 2647(4)  | 4884(2)  | 7342(1) | 27(1) |
| C(13B) | 10379(4) | 5263(2)  | 5499(1) | 25(1) |
| O(60)  | 9892(4)  | 10200(3) | 6419(1) | 60(1) |
| C(15B) | 11751(4) | 5618(2)  | 5023(1) | 26(1) |
| C(9A)  | 1288(4)  | 4651(2)  | 7444(1) | 30(1) |
| C(22A) | 7059(4)  | 6277(2)  | 6209(1) | 29(1) |
| C(30A) | 967(4)   | 2531(2)  | 5938(1) | 31(1) |
| C(6B)  | 7054(4)  | 4222(2)  | 5721(1) | 26(1) |
| C(32A) | 1930(4)  | 2830(2)  | 6450(1) | 30(1) |
| C(19A) | 8629(4)  | 5978(2)  | 7932(1) | 32(1) |
| C(16B) | 12368(4) | 6254(2)  | 5142(1) | 30(1) |
| C(10B) | 7408(4)  | 4823(2)  | 5210(1) | 27(1) |
| C(8B)  | 5156(4)  | 4221(2)  | 5327(1) | 28(1) |
| C(17A) | 8811(4)  | 6780(2)  | 7483(1) | 31(1) |
| C(22B) | 11983(4) | 6308(2)  | 6269(1) | 28(1) |
| C(24A) | 6704(4)  | 6393(2)  | 5647(1) | 28(1) |
| C(29A) | 1285(4)  | 3217(2)  | 5826(1) | 30(1) |
| C(32B) | 6452(5)  | 2918(2)  | 6119(1) | 36(1) |
| C(17B) | 13425(4) | 6612(2)  | 4967(1) | 33(1) |

|        |           |           |          |       |
|--------|-----------|-----------|----------|-------|
| C(20A) | 7521(4)   | 5603(2)   | 7780(1)  | 30(1) |
| C(18A) | 9267(4)   | 6569(2)   | 7781(1)  | 30(1) |
| C(30B) | 5832(4)   | 2553(2)   | 6644(1)  | 32(1) |
| C(7B)  | 5643(4)   | 4043(2)   | 5630(1)  | 27(1) |
| C(19B) | 13237(4)  | 5726(2)   | 4550(1)  | 34(1) |
| C(31B) | 5809(5)   | 2426(2)   | 6320(1)  | 39(1) |
| C(20B) | 12183(4)  | 5365(2)   | 4722(1)  | 31(1) |
| C(18B) | 13856(4)  | 6349(2)   | 4675(1)  | 33(1) |
| C(8A)  | 475(4)    | 4203(2)   | 7248(1)  | 30(1) |
| C(51)  | 9664(5)   | 2943(2)   | 4502(1)  | 37(1) |
| C(52)  | 7939(4)   | 2909(2)   | 5024(1)  | 34(1) |
| C(56)  | 6132(6)   | 8133(3)   | 7496(1)  | 41(1) |
| C(57)  | 5286(6)   | 8089(3)   | 6888(1)  | 41(1) |
| C(71)  | 8388(6)   | 4782(3)   | 3650(1)  | 52(1) |
| C(67)  | 9769(6)   | 7979(3)   | 6382(1)  | 50(1) |
| C(72)  | 7006(6)   | 5077(3)   | 4194(1)  | 53(1) |
| C(61)  | 7448(8)   | 10082(4)  | 6748(2)  | 62(1) |
| C(76)  | 6138(6)   | 8345(3)   | 6015(1)  | 57(1) |
| C(66)  | 11420(6)  | 8772(3)   | 6760(1)  | 50(1) |
| C(77)  | 4343(6)   | 8345(4)   | 5523(1)  | 64(2) |
| C(62)  | 7608(7)   | 10886(4)  | 6204(2)  | 62(1) |
| C(61A) | 7700(40)  | 10610(20) | 6038(7)  | 62(1) |
| S(60A) | 8351(12)  | 10918(8)  | 6408(3)  | 80(4) |
| C(62A) | 7390(40)  | 10300(30) | 6675(10) | 62(1) |
| O(60A) | 9870(20)  | 10640(20) | 6421(7)  | 60(1) |
| O(55A) | 4270(30)  | 9099(19)  | 7327(7)  | 36(1) |
| C(56A) | 5080(60)  | 8290(30)  | 6816(9)  | 41(1) |
| S(55A) | 5606(11)  | 8823(6)   | 7147(3)  | 35(1) |
| C(57A) | 6290(60)  | 8100(20)  | 7400(10) | 41(1) |
| O(65A) | 8060(40)  | 8850(30)  | 6651(11) | 53(1) |
| S(65A) | 9387(17)  | 8713(9)   | 6438(4)  | 41(1) |
| C(66A) | 9490(70)  | 7780(16)  | 6512(16) | 50(1) |
| C(67A) | 10850(50) | 9020(40)  | 6690(15) | 50(1) |

---

Table S3. Bond lengths [Å] and angles [°] for **7**.

|               |          |
|---------------|----------|
| Cl(1B)-C(8B)  | 1.736(4) |
| Cl(3B)-C(24B) | 1.750(4) |
| Cl(2A)-C(18A) | 1.742(4) |
| S(50)-O(50)   | 1.511(3) |
| S(50)-C(51)   | 1.792(4) |
| S(50)-C(52)   | 1.793(4) |
| Cl(1A)-C(8A)  | 1.742(4) |
| Cl(3A)-C(24A) | 1.749(4) |
| Cl(4B)-C(30B) | 1.755(4) |
| Cl(4A)-C(30A) | 1.755(4) |
| Cl(2B)-C(18B) | 1.746(4) |
| S(55)-O(55)   | 1.518(3) |
| S(55)-C(56)   | 1.784(5) |
| S(55)-C(57)   | 1.793(5) |
| S(70)-O(70)   | 1.502(4) |
| S(70)-C(71)   | 1.787(5) |
| S(70)-C(72)   | 1.783(5) |
| S(75)-O(75)   | 1.502(3) |
| S(75)-C(76)   | 1.779(6) |
| S(75)-C(77)   | 1.802(6) |
| S(65)-O(65)   | 1.493(4) |
| S(65)-C(67)   | 1.799(5) |
| S(65)-C(66)   | 1.752(6) |
| S(60)-O(60)   | 1.496(4) |
| S(60)-C(61)   | 1.803(8) |
| S(60)-C(62)   | 1.781(7) |
| N(12A)-C(13A) | 1.406(4) |
| N(12A)-C(3A)  | 1.397(4) |
| N(12A)-C(11A) | 1.424(4) |
| N(12B)-C(3B)  | 1.399(4) |
| N(12B)-C(11B) | 1.422(4) |
| N(12B)-C(13B) | 1.395(4) |
| N(2A)-N(1A)   | 1.412(4) |
| N(2A)-C(21A)  | 1.404(4) |
| N(2A)-C(3A)   | 1.364(4) |
| N(2B)-N(1B)   | 1.411(4) |
| N(2B)-C(3B)   | 1.374(4) |
| N(2B)-C(21B)  | 1.403(4) |

|               |          |
|---------------|----------|
| N(1A)-C(13A)  | 1.310(4) |
| N(14B)-C(13B) | 1.355(4) |
| N(14B)-C(15B) | 1.404(4) |
| N(14B)-H(14B) | 0.84(5)  |
| N(14A)-C(13A) | 1.354(4) |
| N(14A)-C(15A) | 1.415(4) |
| N(14A)-H(14A) | 0.85(4)  |
| N(4B)-N(5B)   | 1.432(4) |
| N(4B)-C(3B)   | 1.289(4) |
| N(4A)-N(5A)   | 1.441(4) |
| N(4A)-C(3A)   | 1.290(5) |
| N(5A)-C(27A)  | 1.424(4) |
| N(5A)-C(6A)   | 1.413(4) |
| N(5B)-C(27B)  | 1.401(5) |
| N(5B)-C(6B)   | 1.409(4) |
| N(1B)-C(13B)  | 1.300(5) |
| C(21A)-C(26A) | 1.395(5) |
| C(21A)-C(22A) | 1.400(5) |
| C(7A)-H(7A)   | 0.9500   |
| C(7A)-C(6A)   | 1.391(5) |
| C(7A)-C(8A)   | 1.391(5) |
| C(28A)-H(28A) | 0.9500   |
| C(28A)-C(27A) | 1.384(5) |
| C(28A)-C(29A) | 1.399(5) |
| C(27A)-C(32A) | 1.401(5) |
| C(6A)-C(11A)  | 1.413(5) |
| C(9B)-H(9B)   | 0.9500   |
| C(9B)-C(10B)  | 1.391(5) |
| C(9B)-C(8B)   | 1.395(5) |
| C(25B)-H(25B) | 0.9500   |
| C(25B)-C(26B) | 1.378(5) |
| C(25B)-C(24B) | 1.388(5) |
| C(26A)-H(26A) | 0.9500   |
| C(26A)-C(25A) | 1.386(5) |
| C(15A)-C(16A) | 1.390(5) |
| C(15A)-C(20A) | 1.398(5) |
| C(11B)-C(6B)  | 1.402(5) |
| C(11B)-C(10B) | 1.391(5) |
| C(25A)-H(25A) | 0.9500   |
| C(25A)-C(24A) | 1.379(5) |

|               |          |
|---------------|----------|
| C(23B)-H(23B) | 0.9500   |
| C(23B)-C(24B) | 1.385(5) |
| C(23B)-C(22B) | 1.377(5) |
| C(29B)-H(29B) | 0.9500   |
| C(29B)-C(28B) | 1.389(5) |
| C(29B)-C(30B) | 1.381(5) |
| C(26B)-H(26B) | 0.9500   |
| C(26B)-C(21B) | 1.399(5) |
| C(11A)-C(10A) | 1.385(5) |
| C(31A)-H(31A) | 0.9500   |
| C(31A)-C(30A) | 1.388(5) |
| C(31A)-C(32A) | 1.382(5) |
| C(16A)-H(16A) | 0.9500   |
| C(16A)-C(17A) | 1.396(5) |
| C(23A)-H(23A) | 0.9500   |
| C(23A)-C(22A) | 1.388(5) |
| C(23A)-C(24A) | 1.387(5) |
| C(21B)-C(22B) | 1.401(5) |
| C(28B)-H(28B) | 0.9500   |
| C(28B)-C(27B) | 1.394(5) |
| C(27B)-C(32B) | 1.402(5) |
| C(10A)-H(10A) | 0.9500   |
| C(10A)-C(9A)  | 1.389(5) |
| C(15B)-C(16B) | 1.393(5) |
| C(15B)-C(20B) | 1.404(5) |
| C(9A)-H(9A)   | 0.9500   |
| C(9A)-C(8A)   | 1.387(5) |
| C(22A)-H(22A) | 0.9500   |
| C(30A)-C(29A) | 1.381(5) |
| C(6B)-C(7B)   | 1.392(5) |
| C(32A)-H(32A) | 0.9500   |
| C(19A)-H(19A) | 0.9500   |
| C(19A)-C(20A) | 1.387(5) |
| C(19A)-C(18A) | 1.390(5) |
| C(16B)-H(16B) | 0.9500   |
| C(16B)-C(17B) | 1.386(5) |
| C(10B)-H(10B) | 0.9500   |
| C(8B)-C(7B)   | 1.389(5) |
| C(17A)-H(17A) | 0.9500   |
| C(17A)-C(18A) | 1.374(5) |

|               |          |
|---------------|----------|
| C(22B)-H(22B) | 0.9500   |
| C(29A)-H(29A) | 0.9500   |
| C(32B)-H(32B) | 0.9500   |
| C(32B)-C(31B) | 1.372(6) |
| C(17B)-H(17B) | 0.9500   |
| C(17B)-C(18B) | 1.379(6) |
| C(20A)-H(20A) | 0.9500   |
| C(30B)-C(31B) | 1.380(6) |
| C(7B)-H(7B)   | 0.9500   |
| C(19B)-H(19B) | 0.9500   |
| C(19B)-C(20B) | 1.381(5) |
| C(19B)-C(18B) | 1.385(6) |
| C(31B)-H(31B) | 0.9500   |
| C(20B)-H(20B) | 0.9500   |
| C(51)-H(51A)  | 0.9800   |
| C(51)-H(51B)  | 0.9800   |
| C(51)-H(51C)  | 0.9800   |
| C(52)-H(52A)  | 0.9800   |
| C(52)-H(52B)  | 0.9800   |
| C(52)-H(52C)  | 0.9800   |
| C(56)-H(56A)  | 0.9800   |
| C(56)-H(56B)  | 0.9800   |
| C(56)-H(56C)  | 0.9800   |
| C(57)-H(57A)  | 0.9800   |
| C(57)-H(57B)  | 0.9800   |
| C(57)-H(57C)  | 0.9800   |
| C(71)-H(71A)  | 0.9800   |
| C(71)-H(71B)  | 0.9800   |
| C(71)-H(71C)  | 0.9800   |
| C(67)-H(67A)  | 0.9800   |
| C(67)-H(67B)  | 0.9800   |
| C(67)-H(67C)  | 0.9800   |
| C(72)-H(72A)  | 0.9800   |
| C(72)-H(72B)  | 0.9800   |
| C(72)-H(72C)  | 0.9800   |
| C(61)-H(61A)  | 0.9800   |
| C(61)-H(61B)  | 0.9800   |
| C(61)-H(61C)  | 0.9800   |
| C(76)-H(76A)  | 0.9800   |
| C(76)-H(76B)  | 0.9800   |



|                   |            |
|-------------------|------------|
| C(76)-H(76C)      | 0.9800     |
| C(66)-H(66A)      | 0.9800     |
| C(66)-H(66B)      | 0.9800     |
| C(66)-H(66C)      | 0.9800     |
| C(77)-H(77A)      | 0.9800     |
| C(77)-H(77B)      | 0.9800     |
| C(77)-H(77C)      | 0.9800     |
| C(62)-H(62A)      | 0.9800     |
| C(62)-H(62B)      | 0.9800     |
| C(62)-H(62C)      | 0.9800     |
| C(61A)-H(61D)     | 0.9800     |
| C(61A)-H(61E)     | 0.9800     |
| C(61A)-H(61F)     | 0.9800     |
| C(61A)-S(60A)     | 1.76(2)    |
| S(60A)-C(62A)     | 1.83(2)    |
| S(60A)-O(60A)     | 1.48(2)    |
| C(62A)-H(62D)     | 0.9800     |
| C(62A)-H(62E)     | 0.9800     |
| C(62A)-H(62F)     | 0.9800     |
| O(55A)-S(55A)     | 1.53(2)    |
| C(56A)-H(56D)     | 0.9800     |
| C(56A)-H(56E)     | 0.9800     |
| C(56A)-H(56F)     | 0.9800     |
| C(56A)-S(55A)     | 1.77(2)    |
| S(55A)-C(57A)     | 1.81(3)    |
| C(57A)-H(57D)     | 0.9800     |
| C(57A)-H(57E)     | 0.9800     |
| C(57A)-H(57F)     | 0.9800     |
| O(65A)-S(65A)     | 1.53(2)    |
| S(65A)-C(66A)     | 1.75(3)    |
| S(65A)-C(67A)     | 1.80(3)    |
| C(66A)-H(66D)     | 0.9800     |
| C(66A)-H(66E)     | 0.9800     |
| C(66A)-H(66F)     | 0.9800     |
| C(67A)-H(67D)     | 0.9800     |
| C(67A)-H(67E)     | 0.9800     |
| C(67A)-H(67F)     | 0.9800     |
| O(50)-S(50)-C(51) | 104.92(18) |
| O(50)-S(50)-C(52) | 105.50(17) |

|                      |           |
|----------------------|-----------|
| C(52)-S(50)-C(51)    | 98.05(19) |
| O(55)-S(55)-C(56)    | 107.3(2)  |
| O(55)-S(55)-C(57)    | 106.0(2)  |
| C(56)-S(55)-C(57)    | 96.7(2)   |
| O(70)-S(70)-C(71)    | 106.1(2)  |
| O(70)-S(70)-C(72)    | 107.3(2)  |
| C(72)-S(70)-C(71)    | 96.8(2)   |
| O(75)-S(75)-C(76)    | 106.3(2)  |
| O(75)-S(75)-C(77)    | 106.7(2)  |
| C(76)-S(75)-C(77)    | 95.1(3)   |
| O(65)-S(65)-C(67)    | 106.6(2)  |
| O(65)-S(65)-C(66)    | 108.1(2)  |
| C(66)-S(65)-C(67)    | 96.0(3)   |
| O(60)-S(60)-C(61)    | 106.3(3)  |
| O(60)-S(60)-C(62)    | 105.3(3)  |
| C(62)-S(60)-C(61)    | 99.0(3)   |
| C(13A)-N(12A)-C(11A) | 130.0(3)  |
| C(3A)-N(12A)-C(13A)  | 106.2(3)  |
| C(3A)-N(12A)-C(11A)  | 114.4(3)  |
| C(3B)-N(12B)-C(11B)  | 114.3(3)  |
| C(13B)-N(12B)-C(3B)  | 106.5(3)  |
| C(13B)-N(12B)-C(11B) | 129.8(3)  |
| C(21A)-N(2A)-N(1A)   | 118.8(3)  |
| C(3A)-N(2A)-N(1A)    | 111.3(3)  |
| C(3A)-N(2A)-C(21A)   | 129.7(3)  |
| C(3B)-N(2B)-N(1B)    | 110.9(3)  |
| C(3B)-N(2B)-C(21B)   | 129.8(3)  |
| C(21B)-N(2B)-N(1B)   | 119.1(3)  |
| C(13A)-N(1A)-N(2A)   | 104.7(3)  |
| C(13B)-N(14B)-C(15B) | 125.2(3)  |
| C(13B)-N(14B)-H(14B) | 112(3)    |
| C(15B)-N(14B)-H(14B) | 114(3)    |
| C(13A)-N(14A)-C(15A) | 125.5(3)  |
| C(13A)-N(14A)-H(14A) | 119(3)    |
| C(15A)-N(14A)-H(14A) | 112(3)    |
| C(3B)-N(4B)-N(5B)    | 110.6(3)  |
| C(3A)-N(4A)-N(5A)    | 110.2(3)  |
| C(27A)-N(5A)-N(4A)   | 112.7(3)  |
| C(6A)-N(5A)-N(4A)    | 115.7(3)  |
| C(6A)-N(5A)-C(27A)   | 120.8(3)  |

|                      |          |
|----------------------|----------|
| C(27B)-N(5B)-N(4B)   | 114.4(3) |
| C(27B)-N(5B)-C(6B)   | 122.9(3) |
| C(6B)-N(5B)-N(4B)    | 116.6(3) |
| C(13B)-N(1B)-N(2B)   | 105.0(3) |
| N(1A)-C(13A)-N(12A)  | 112.1(3) |
| N(1A)-C(13A)-N(14A)  | 127.1(3) |
| N(14A)-C(13A)-N(12A) | 120.6(3) |
| C(26A)-C(21A)-N(2A)  | 120.5(3) |
| C(26A)-C(21A)-C(22A) | 120.2(3) |
| C(22A)-C(21A)-N(2A)  | 119.3(3) |
| C(6A)-C(7A)-H(7A)    | 120.6    |
| C(6A)-C(7A)-C(8A)    | 118.7(3) |
| C(8A)-C(7A)-H(7A)    | 120.6    |
| C(27A)-C(28A)-H(28A) | 119.9    |
| C(27A)-C(28A)-C(29A) | 120.2(3) |
| C(29A)-C(28A)-H(28A) | 119.9    |
| C(28A)-C(27A)-N(5A)  | 121.6(3) |
| C(28A)-C(27A)-C(32A) | 119.5(3) |
| C(32A)-C(27A)-N(5A)  | 118.8(3) |
| N(2A)-C(3A)-N(12A)   | 105.6(3) |
| N(4A)-C(3A)-N(12A)   | 125.6(3) |
| N(4A)-C(3A)-N(2A)    | 128.8(3) |
| N(2B)-C(3B)-N(12B)   | 105.0(3) |
| N(4B)-C(3B)-N(12B)   | 125.6(3) |
| N(4B)-C(3B)-N(2B)    | 129.4(3) |
| C(7A)-C(6A)-N(5A)    | 124.4(3) |
| C(7A)-C(6A)-C(11A)   | 119.3(3) |
| C(11A)-C(6A)-N(5A)   | 116.3(3) |
| C(10B)-C(9B)-H(9B)   | 120.5    |
| C(10B)-C(9B)-C(8B)   | 118.9(3) |
| C(8B)-C(9B)-H(9B)    | 120.5    |
| C(26B)-C(25B)-H(25B) | 120.2    |
| C(26B)-C(25B)-C(24B) | 119.6(3) |
| C(24B)-C(25B)-H(25B) | 120.2    |
| C(21A)-C(26A)-H(26A) | 120.2    |
| C(25A)-C(26A)-C(21A) | 119.6(3) |
| C(25A)-C(26A)-H(26A) | 120.2    |
| C(16A)-C(15A)-N(14A) | 124.5(3) |
| C(16A)-C(15A)-C(20A) | 119.2(3) |
| C(20A)-C(15A)-N(14A) | 116.4(3) |

|                      |          |
|----------------------|----------|
| C(6B)-C(11B)-N(12B)  | 114.6(3) |
| C(10B)-C(11B)-N(12B) | 124.1(3) |
| C(10B)-C(11B)-C(6B)  | 121.2(3) |
| C(26A)-C(25A)-H(25A) | 120.1    |
| C(24A)-C(25A)-C(26A) | 119.8(3) |
| C(24A)-C(25A)-H(25A) | 120.1    |
| C(24B)-C(23B)-H(23B) | 120.1    |
| C(22B)-C(23B)-H(23B) | 120.1    |
| C(22B)-C(23B)-C(24B) | 119.8(3) |
| C(28B)-C(29B)-H(29B) | 120.1    |
| C(30B)-C(29B)-H(29B) | 120.1    |
| C(30B)-C(29B)-C(28B) | 119.8(3) |
| C(25B)-C(26B)-H(26B) | 120.0    |
| C(25B)-C(26B)-C(21B) | 119.9(3) |
| C(21B)-C(26B)-H(26B) | 120.0    |
| C(6A)-C(11A)-N(12A)  | 113.8(3) |
| C(10A)-C(11A)-N(12A) | 125.2(3) |
| C(10A)-C(11A)-C(6A)  | 120.8(3) |
| C(30A)-C(31A)-H(31A) | 120.5    |
| C(32A)-C(31A)-H(31A) | 120.5    |
| C(32A)-C(31A)-C(30A) | 119.0(4) |
| C(15A)-C(16A)-H(16A) | 120.1    |
| C(15A)-C(16A)-C(17A) | 119.9(3) |
| C(17A)-C(16A)-H(16A) | 120.1    |
| C(22A)-C(23A)-H(23A) | 120.4    |
| C(24A)-C(23A)-H(23A) | 120.4    |
| C(24A)-C(23A)-C(22A) | 119.1(3) |
| C(26B)-C(21B)-N(2B)  | 121.0(3) |
| C(26B)-C(21B)-C(22B) | 119.8(3) |
| C(22B)-C(21B)-N(2B)  | 119.1(3) |
| C(25B)-C(24B)-Cl(3B) | 119.0(3) |
| C(23B)-C(24B)-Cl(3B) | 120.1(3) |
| C(23B)-C(24B)-C(25B) | 120.9(3) |
| C(29B)-C(28B)-H(28B) | 119.9    |
| C(29B)-C(28B)-C(27B) | 120.3(3) |
| C(27B)-C(28B)-H(28B) | 119.9    |
| N(5B)-C(27B)-C(32B)  | 119.6(3) |
| C(28B)-C(27B)-N(5B)  | 122.1(3) |
| C(28B)-C(27B)-C(32B) | 118.2(3) |
| C(11A)-C(10A)-H(10A) | 120.0    |

|                      |          |
|----------------------|----------|
| C(11A)-C(10A)-C(9A)  | 120.0(3) |
| C(9A)-C(10A)-H(10A)  | 120.0    |
| N(14B)-C(13B)-N(12B) | 119.6(3) |
| N(1B)-C(13B)-N(12B)  | 112.5(3) |
| N(1B)-C(13B)-N(14B)  | 127.8(3) |
| N(14B)-C(15B)-C(20B) | 117.2(3) |
| C(16B)-C(15B)-N(14B) | 123.6(3) |
| C(16B)-C(15B)-C(20B) | 119.2(3) |
| C(10A)-C(9A)-H(9A)   | 120.6    |
| C(8A)-C(9A)-C(10A)   | 118.9(3) |
| C(8A)-C(9A)-H(9A)    | 120.6    |
| C(21A)-C(22A)-H(22A) | 120.1    |
| C(23A)-C(22A)-C(21A) | 119.8(3) |
| C(23A)-C(22A)-H(22A) | 120.1    |
| C(31A)-C(30A)-Cl(4A) | 119.5(3) |
| C(29A)-C(30A)-Cl(4A) | 119.0(3) |
| C(29A)-C(30A)-C(31A) | 121.5(4) |
| C(11B)-C(6B)-N(5B)   | 116.3(3) |
| C(7B)-C(6B)-N(5B)    | 124.8(3) |
| C(7B)-C(6B)-C(11B)   | 118.8(3) |
| C(27A)-C(32A)-H(32A) | 119.7    |
| C(31A)-C(32A)-C(27A) | 120.6(3) |
| C(31A)-C(32A)-H(32A) | 119.7    |
| C(20A)-C(19A)-H(19A) | 120.4    |
| C(20A)-C(19A)-C(18A) | 119.2(3) |
| C(18A)-C(19A)-H(19A) | 120.4    |
| C(15B)-C(16B)-H(16B) | 120.1    |
| C(17B)-C(16B)-C(15B) | 119.8(3) |
| C(17B)-C(16B)-H(16B) | 120.1    |
| C(9B)-C(10B)-C(11B)  | 119.7(3) |
| C(9B)-C(10B)-H(10B)  | 120.1    |
| C(11B)-C(10B)-H(10B) | 120.1    |
| C(9B)-C(8B)-Cl(1B)   | 119.0(3) |
| C(7B)-C(8B)-Cl(1B)   | 119.5(3) |
| C(7B)-C(8B)-C(9B)    | 121.5(3) |
| C(16A)-C(17A)-H(17A) | 119.9    |
| C(18A)-C(17A)-C(16A) | 120.3(3) |
| C(18A)-C(17A)-H(17A) | 119.9    |
| C(23B)-C(22B)-C(21B) | 119.7(3) |
| C(23B)-C(22B)-H(22B) | 120.1    |

|                      |          |
|----------------------|----------|
| C(21B)-C(22B)-H(22B) | 120.1    |
| C(25A)-C(24A)-Cl(3A) | 119.2(3) |
| C(25A)-C(24A)-C(23A) | 121.5(3) |
| C(23A)-C(24A)-Cl(3A) | 119.3(3) |
| C(28A)-C(29A)-H(29A) | 120.4    |
| C(30A)-C(29A)-C(28A) | 119.2(3) |
| C(30A)-C(29A)-H(29A) | 120.4    |
| C(27B)-C(32B)-H(32B) | 119.2    |
| C(31B)-C(32B)-C(27B) | 121.5(4) |
| C(31B)-C(32B)-H(32B) | 119.2    |
| C(16B)-C(17B)-H(17B) | 119.8    |
| C(18B)-C(17B)-C(16B) | 120.4(4) |
| C(18B)-C(17B)-H(17B) | 119.8    |
| C(15A)-C(20A)-H(20A) | 119.6    |
| C(19A)-C(20A)-C(15A) | 120.8(3) |
| C(19A)-C(20A)-H(20A) | 119.6    |
| C(19A)-C(18A)-Cl(2A) | 119.1(3) |
| C(17A)-C(18A)-Cl(2A) | 120.3(3) |
| C(17A)-C(18A)-C(19A) | 120.6(3) |
| C(29B)-C(30B)-Cl(4B) | 120.5(3) |
| C(31B)-C(30B)-Cl(4B) | 118.5(3) |
| C(31B)-C(30B)-C(29B) | 120.9(4) |
| C(6B)-C(7B)-H(7B)    | 120.2    |
| C(8B)-C(7B)-C(6B)    | 119.7(3) |
| C(8B)-C(7B)-H(7B)    | 120.2    |
| C(20B)-C(19B)-H(19B) | 120.4    |
| C(20B)-C(19B)-C(18B) | 119.2(4) |
| C(18B)-C(19B)-H(19B) | 120.4    |
| C(32B)-C(31B)-C(30B) | 119.1(4) |
| C(32B)-C(31B)-H(31B) | 120.4    |
| C(30B)-C(31B)-H(31B) | 120.4    |
| C(15B)-C(20B)-H(20B) | 119.7    |
| C(19B)-C(20B)-C(15B) | 120.7(4) |
| C(19B)-C(20B)-H(20B) | 119.7    |
| C(17B)-C(18B)-Cl(2B) | 120.2(3) |
| C(17B)-C(18B)-C(19B) | 120.8(4) |
| C(19B)-C(18B)-Cl(2B) | 119.0(3) |
| C(7A)-C(8A)-Cl(1A)   | 118.4(3) |
| C(9A)-C(8A)-Cl(1A)   | 119.2(3) |
| C(9A)-C(8A)-C(7A)    | 122.3(3) |

|                     |       |
|---------------------|-------|
| S(50)-C(51)-H(51A)  | 109.5 |
| S(50)-C(51)-H(51B)  | 109.5 |
| S(50)-C(51)-H(51C)  | 109.5 |
| H(51A)-C(51)-H(51B) | 109.5 |
| H(51A)-C(51)-H(51C) | 109.5 |
| H(51B)-C(51)-H(51C) | 109.5 |
| S(50)-C(52)-H(52A)  | 109.5 |
| S(50)-C(52)-H(52B)  | 109.5 |
| S(50)-C(52)-H(52C)  | 109.5 |
| H(52A)-C(52)-H(52B) | 109.5 |
| H(52A)-C(52)-H(52C) | 109.5 |
| H(52B)-C(52)-H(52C) | 109.5 |
| S(55)-C(56)-H(56A)  | 109.5 |
| S(55)-C(56)-H(56B)  | 109.5 |
| S(55)-C(56)-H(56C)  | 109.5 |
| H(56A)-C(56)-H(56B) | 109.5 |
| H(56A)-C(56)-H(56C) | 109.5 |
| H(56B)-C(56)-H(56C) | 109.5 |
| S(55)-C(57)-H(57A)  | 109.5 |
| S(55)-C(57)-H(57B)  | 109.5 |
| S(55)-C(57)-H(57C)  | 109.5 |
| H(57A)-C(57)-H(57B) | 109.5 |
| H(57A)-C(57)-H(57C) | 109.5 |
| H(57B)-C(57)-H(57C) | 109.5 |
| S(70)-C(71)-H(71A)  | 109.5 |
| S(70)-C(71)-H(71B)  | 109.5 |
| S(70)-C(71)-H(71C)  | 109.5 |
| H(71A)-C(71)-H(71B) | 109.5 |
| H(71A)-C(71)-H(71C) | 109.5 |
| H(71B)-C(71)-H(71C) | 109.5 |
| S(65)-C(67)-H(67A)  | 109.5 |
| S(65)-C(67)-H(67B)  | 109.5 |
| S(65)-C(67)-H(67C)  | 109.5 |
| H(67A)-C(67)-H(67B) | 109.5 |
| H(67A)-C(67)-H(67C) | 109.5 |
| H(67B)-C(67)-H(67C) | 109.5 |
| S(70)-C(72)-H(72A)  | 109.5 |
| S(70)-C(72)-H(72B)  | 109.5 |
| S(70)-C(72)-H(72C)  | 109.5 |
| H(72A)-C(72)-H(72B) | 109.5 |

|                      |           |
|----------------------|-----------|
| H(72A)-C(72)-H(72C)  | 109.5     |
| H(72B)-C(72)-H(72C)  | 109.5     |
| S(60)-C(61)-H(61A)   | 109.5     |
| S(60)-C(61)-H(61B)   | 109.5     |
| S(60)-C(61)-H(61C)   | 109.5     |
| H(61A)-C(61)-H(61B)  | 109.5     |
| H(61A)-C(61)-H(61C)  | 109.5     |
| H(61B)-C(61)-H(61C)  | 109.5     |
| S(75)-C(76)-H(76A)   | 109.5     |
| S(75)-C(76)-H(76B)   | 109.5     |
| S(75)-C(76)-H(76C)   | 109.5     |
| H(76A)-C(76)-H(76B)  | 109.5     |
| H(76A)-C(76)-H(76C)  | 109.5     |
| H(76B)-C(76)-H(76C)  | 109.5     |
| S(65)-C(66)-H(66A)   | 109.5     |
| S(65)-C(66)-H(66B)   | 109.5     |
| S(65)-C(66)-H(66C)   | 109.5     |
| H(66A)-C(66)-H(66B)  | 109.5     |
| H(66A)-C(66)-H(66C)  | 109.5     |
| H(66B)-C(66)-H(66C)  | 109.5     |
| S(75)-C(77)-H(77A)   | 109.5     |
| S(75)-C(77)-H(77B)   | 109.5     |
| S(75)-C(77)-H(77C)   | 109.5     |
| H(77A)-C(77)-H(77B)  | 109.5     |
| H(77A)-C(77)-H(77C)  | 109.5     |
| H(77B)-C(77)-H(77C)  | 109.5     |
| S(60)-C(62)-H(62A)   | 109.5     |
| S(60)-C(62)-H(62B)   | 109.5     |
| S(60)-C(62)-H(62C)   | 109.5     |
| H(62A)-C(62)-H(62B)  | 109.5     |
| H(62A)-C(62)-H(62C)  | 109.5     |
| H(62B)-C(62)-H(62C)  | 109.5     |
| H(61D)-C(61A)-H(61E) | 109.5     |
| H(61D)-C(61A)-H(61F) | 109.5     |
| H(61E)-C(61A)-H(61F) | 109.5     |
| S(60A)-C(61A)-H(61D) | 109.5     |
| S(60A)-C(61A)-H(61E) | 109.5     |
| S(60A)-C(61A)-H(61F) | 109.5     |
| C(61A)-S(60A)-C(62A) | 100.1(19) |
| O(60A)-S(60A)-C(61A) | 104.0(18) |



|                      |           |
|----------------------|-----------|
| O(60A)-S(60A)-C(62A) | 102.6(19) |
| S(60A)-C(62A)-H(62D) | 109.5     |
| S(60A)-C(62A)-H(62E) | 109.5     |
| S(60A)-C(62A)-H(62F) | 109.5     |
| H(62D)-C(62A)-H(62E) | 109.5     |
| H(62D)-C(62A)-H(62F) | 109.5     |
| H(62E)-C(62A)-H(62F) | 109.5     |
| H(56D)-C(56A)-H(56E) | 109.5     |
| H(56D)-C(56A)-H(56F) | 109.5     |
| H(56E)-C(56A)-H(56F) | 109.5     |
| S(55A)-C(56A)-H(56D) | 109.5     |
| S(55A)-C(56A)-H(56E) | 109.5     |
| S(55A)-C(56A)-H(56F) | 109.5     |
| O(55A)-S(55A)-C(56A) | 111(2)    |
| O(55A)-S(55A)-C(57A) | 103(2)    |
| C(56A)-S(55A)-C(57A) | 99(2)     |
| S(55A)-C(57A)-H(57D) | 109.5     |
| S(55A)-C(57A)-H(57E) | 109.5     |
| S(55A)-C(57A)-H(57F) | 109.5     |
| H(57D)-C(57A)-H(57E) | 109.5     |
| H(57D)-C(57A)-H(57F) | 109.5     |
| H(57E)-C(57A)-H(57F) | 109.5     |
| O(65A)-S(65A)-C(66A) | 96(2)     |
| O(65A)-S(65A)-C(67A) | 102(2)    |
| C(66A)-S(65A)-C(67A) | 100(2)    |
| S(65A)-C(66A)-H(66D) | 109.5     |
| S(65A)-C(66A)-H(66E) | 109.5     |
| S(65A)-C(66A)-H(66F) | 109.5     |
| H(66D)-C(66A)-H(66E) | 109.5     |
| H(66D)-C(66A)-H(66F) | 109.5     |
| H(66E)-C(66A)-H(66F) | 109.5     |
| S(65A)-C(67A)-H(67D) | 109.5     |
| S(65A)-C(67A)-H(67E) | 109.5     |
| S(65A)-C(67A)-H(67F) | 109.5     |
| H(67D)-C(67A)-H(67E) | 109.5     |
| H(67D)-C(67A)-H(67F) | 109.5     |
| H(67E)-C(67A)-H(67F) | 109.5     |

---

Table S4. Anisotropic displacement parameters ( $\text{\AA}^2 \times 10^3$ ) for **7**. The anisotropic displacement factor exponent takes the form:  $-2\pi^2 [h^2 a^{*2} U^{11} + \dots + 2 h k a^* b^* U^{12}]$

|        | $U^{11}$ | $U^{22}$ | $U^{33}$ | $U^{23}$ | $U^{13}$ | $U^{12}$ |
|--------|----------|----------|----------|----------|----------|----------|
| Cl(1B) | 23(1)    | 36(1)    | 36(1)    | 1(1)     | -4(1)    | -3(1)    |
| Cl(3B) | 36(1)    | 39(1)    | 30(1)    | -7(1)    | -3(1)    | -5(1)    |
| Cl(2A) | 31(1)    | 43(1)    | 34(1)    | -7(1)    | 0(1)     | -10(1)   |
| S(50)  | 28(1)    | 32(1)    | 29(1)    | -5(1)    | 0(1)     | 2(1)     |
| Cl(1A) | 24(1)    | 55(1)    | 36(1)    | -9(1)    | 9(1)     | -9(1)    |
| Cl(3A) | 48(1)    | 44(1)    | 28(1)    | 9(1)     | 5(1)     | -8(1)    |
| Cl(4B) | 46(1)    | 41(1)    | 40(1)    | 8(1)     | 2(1)     | -10(1)   |
| Cl(4A) | 52(1)    | 42(1)    | 34(1)    | -2(1)    | -5(1)    | -14(1)   |
| Cl(2B) | 36(1)    | 59(1)    | 40(1)    | 14(1)    | 6(1)     | -7(1)    |
| S(55)  | 27(1)    | 39(1)    | 40(1)    | -12(1)   | 5(1)     | -3(1)    |
| S(70)  | 48(1)    | 45(1)    | 42(1)    | 1(1)     | -6(1)    | 1(1)     |
| S(75)  | 45(1)    | 39(1)    | 62(1)    | -4(1)    | 22(1)    | -3(1)    |
| S(65)  | 44(1)    | 42(1)    | 37(1)    | 3(1)     | 3(1)     | 6(1)     |
| S(60)  | 44(1)    | 46(1)    | 43(1)    | -6(1)    | -8(1)    | 6(1)     |
| O(50)  | 29(1)    | 41(1)    | 36(1)    | -7(1)    | -5(1)    | -1(1)    |
| N(12A) | 18(1)    | 33(2)    | 22(1)    | 3(1)     | -1(1)    | -2(1)    |
| N(12B) | 19(1)    | 30(1)    | 25(1)    | -3(1)    | 2(1)     | -2(1)    |
| N(2A)  | 21(1)    | 36(2)    | 21(1)    | 2(1)     | -1(1)    | -3(1)    |
| N(2B)  | 22(1)    | 30(1)    | 23(1)    | -4(1)    | 3(1)     | -3(1)    |
| O(55)  | 36(2)    | 40(2)    | 33(2)    | -10(1)   | -1(1)    | 5(1)     |
| N(1A)  | 21(1)    | 35(2)    | 24(1)    | 1(1)     | -3(1)    | -1(1)    |
| N(14B) | 22(1)    | 34(2)    | 27(1)    | -6(1)    | 3(1)     | -4(1)    |
| N(14A) | 21(1)    | 33(2)    | 24(1)    | 4(1)     | -3(1)    | -4(1)    |
| N(4B)  | 21(1)    | 28(1)    | 25(1)    | -5(1)    | 1(1)     | -5(1)    |
| N(4A)  | 23(1)    | 32(2)    | 23(1)    | 3(1)     | 3(1)     | -4(1)    |
| O(75)  | 41(2)    | 55(2)    | 42(2)    | 2(1)     | 13(1)    | 4(1)     |
| N(5A)  | 23(1)    | 30(1)    | 22(1)    | 1(1)     | 3(1)     | -5(1)    |
| N(5B)  | 30(1)    | 28(1)    | 25(1)    | -2(1)    | -3(1)    | -4(1)    |
| N(1B)  | 21(1)    | 33(2)    | 25(1)    | -2(1)    | 4(1)     | -1(1)    |
| C(13A) | 18(1)    | 29(2)    | 24(2)    | 4(1)     | -1(1)    | -1(1)    |
| O(70)  | 51(2)    | 74(2)    | 50(2)    | 2(2)     | -14(2)   | 1(2)     |
| C(21A) | 20(1)    | 27(2)    | 25(2)    | 6(1)     | 2(1)     | 3(1)     |
| C(7A)  | 23(2)    | 33(2)    | 24(2)    | 1(1)     | 1(1)     | 1(1)     |
| C(28A) | 23(2)    | 34(2)    | 26(2)    | 2(1)     | 2(1)     | 1(1)     |
| C(27A) | 19(1)    | 32(2)    | 25(2)    | -1(1)    | 2(1)     | 2(1)     |

|        |       |       |       |       |       |       |
|--------|-------|-------|-------|-------|-------|-------|
| C(3A)  | 17(1) | 29(2) | 25(2) | 2(1)  | 1(1)  | 0(1)  |
| C(3B)  | 21(2) | 28(2) | 24(2) | -5(1) | 0(1)  | 0(1)  |
| C(6A)  | 21(1) | 28(2) | 24(2) | 3(1)  | 0(1)  | 1(1)  |
| C(9B)  | 23(2) | 35(2) | 26(2) | -1(1) | -3(1) | 0(1)  |
| C(25B) | 26(2) | 30(2) | 28(2) | 1(1)  | -1(1) | 2(1)  |
| O(65)  | 40(2) | 65(2) | 54(2) | -4(2) | 13(2) | -5(2) |
| C(26A) | 21(2) | 30(2) | 25(2) | 0(1)  | 2(1)  | 2(1)  |
| C(15A) | 19(1) | 27(2) | 27(2) | -2(1) | 1(1)  | 2(1)  |
| C(11B) | 21(2) | 29(2) | 24(2) | -6(1) | -1(1) | 1(1)  |
| C(25A) | 28(2) | 30(2) | 24(2) | 0(1)  | 1(1)  | 1(1)  |
| C(23B) | 23(2) | 31(2) | 34(2) | -7(1) | 2(1)  | -4(1) |
| C(29B) | 25(2) | 39(2) | 30(2) | 0(2)  | 1(1)  | -4(2) |
| C(26B) | 21(2) | 29(2) | 28(2) | -1(1) | 1(1)  | 2(1)  |
| C(11A) | 18(1) | 31(2) | 24(2) | 4(1)  | 2(1)  | -1(1) |
| C(31A) | 35(2) | 34(2) | 28(2) | 3(1)  | 3(2)  | -4(2) |
| C(16A) | 27(2) | 32(2) | 29(2) | 4(1)  | -1(1) | 0(1)  |
| C(23A) | 23(2) | 32(2) | 33(2) | 6(1)  | 3(1)  | 2(1)  |
| C(21B) | 19(1) | 26(2) | 27(2) | -5(1) | -1(1) | 3(1)  |
| C(24B) | 22(2) | 30(2) | 30(2) | -3(1) | -2(1) | 1(1)  |
| C(28B) | 22(2) | 33(2) | 29(2) | -4(1) | -2(1) | -2(1) |
| C(27B) | 22(2) | 28(2) | 28(2) | 1(1)  | 0(1)  | 0(1)  |
| C(10A) | 24(2) | 32(2) | 26(2) | 1(1)  | 1(1)  | 0(1)  |
| C(13B) | 21(2) | 30(2) | 24(2) | -2(1) | 4(1)  | 0(1)  |
| O(60)  | 38(2) | 84(3) | 57(2) | -6(3) | 0(2)  | 12(2) |
| C(15B) | 20(1) | 34(2) | 24(2) | 1(1)  | 1(1)  | 2(1)  |
| C(9A)  | 24(2) | 38(2) | 28(2) | 0(1)  | 4(1)  | 2(1)  |
| C(22A) | 23(2) | 35(2) | 29(2) | 5(1)  | -1(1) | -1(1) |
| C(30A) | 27(2) | 38(2) | 29(2) | -1(2) | 2(1)  | -6(2) |
| C(6B)  | 28(2) | 28(2) | 23(2) | -5(1) | 0(1)  | -2(1) |
| C(32A) | 31(2) | 32(2) | 26(2) | 2(1)  | 1(1)  | -1(1) |
| C(19A) | 32(2) | 37(2) | 28(2) | -1(1) | -4(1) | -2(2) |
| C(16B) | 29(2) | 34(2) | 26(2) | 1(1)  | -2(1) | 1(1)  |
| C(10B) | 23(2) | 30(2) | 27(2) | 1(1)  | 0(1)  | -1(1) |
| C(8B)  | 24(2) | 31(2) | 29(2) | -2(1) | 2(1)  | 2(1)  |
| C(17A) | 28(2) | 33(2) | 33(2) | 0(2)  | 4(1)  | -4(1) |
| C(22B) | 22(2) | 30(2) | 30(2) | -4(1) | 4(1)  | 0(1)  |
| C(24A) | 27(2) | 31(2) | 28(2) | 4(1)  | 1(1)  | 4(1)  |
| C(29A) | 25(2) | 37(2) | 28(2) | 1(1)  | -1(1) | 0(1)  |
| C(32B) | 47(2) | 32(2) | 30(2) | -3(2) | -1(2) | -6(2) |
| C(17B) | 32(2) | 38(2) | 29(2) | 7(2)  | -5(2) | -4(2) |

|        |       |         |       |        |       |       |
|--------|-------|---------|-------|--------|-------|-------|
| C(20A) | 30(2) | 34(2)   | 28(2) | 3(1)   | -3(1) | -4(1) |
| C(18A) | 24(2) | 35(2)   | 31(2) | -3(1)  | 3(1)  | 2(1)  |
| C(30B) | 26(2) | 35(2)   | 34(2) | 5(2)   | -1(1) | -1(2) |
| C(7B)  | 26(2) | 28(2)   | 27(2) | -2(1)  | 1(1)  | -2(1) |
| C(19B) | 31(2) | 43(2)   | 28(2) | 2(2)   | 2(1)  | 5(2)  |
| C(31B) | 49(2) | 27(2)   | 40(2) | -1(2)  | -3(2) | -7(2) |
| C(20B) | 29(2) | 35(2)   | 29(2) | -1(1)  | 3(1)  | 2(2)  |
| C(18B) | 28(2) | 41(2)   | 30(2) | 10(2)  | -1(1) | 3(2)  |
| C(8A)  | 26(2) | 38(2)   | 27(2) | 2(1)   | 4(1)  | 0(1)  |
| C(51)  | 38(2) | 40(2)   | 34(2) | -8(2)  | 2(2)  | 2(2)  |
| C(52)  | 31(2) | 36(2)   | 34(2) | -5(2)  | 1(2)  | 2(2)  |
| C(56)  | 40(2) | 42(2)   | 41(2) | -9(2)  | 4(2)  | -1(1) |
| C(57)  | 40(2) | 42(2)   | 41(2) | -9(2)  | 4(2)  | -1(1) |
| C(71)  | 47(2) | 70(3)   | 40(2) | -8(2)  | -2(2) | 10(2) |
| C(67)  | 42(2) | 66(2)   | 43(2) | -13(2) | -3(2) | 3(2)  |
| C(72)  | 52(3) | 65(3)   | 40(2) | -3(2)  | 5(2)  | 1(2)  |
| C(61)  | 47(2) | 73(3)   | 65(3) | 17(2)  | -4(2) | 4(2)  |
| C(76)  | 45(3) | 78(4)   | 48(3) | 9(2)   | 7(2)  | 8(3)  |
| C(66)  | 42(2) | 66(2)   | 43(2) | -13(2) | -3(2) | 3(2)  |
| C(77)  | 47(3) | 108(5)  | 37(2) | -21(3) | 8(2)  | -9(3) |
| C(62)  | 47(2) | 73(3)   | 65(3) | 17(2)  | -4(2) | 4(2)  |
| C(61A) | 47(2) | 73(3)   | 65(3) | 17(2)  | -4(2) | 4(2)  |
| S(60A) | 45(5) | 102(10) | 92(9) | -12(7) | -1(6) | 22(6) |
| C(62A) | 47(2) | 73(3)   | 65(3) | 17(2)  | -4(2) | 4(2)  |
| O(60A) | 38(2) | 84(3)   | 57(2) | -6(3)  | 0(2)  | 12(2) |
| O(55A) | 36(2) | 40(2)   | 33(2) | -10(1) | -1(1) | 5(1)  |
| C(56A) | 40(2) | 42(2)   | 41(2) | -9(2)  | 4(2)  | -1(1) |
| S(55A) | 27(1) | 39(1)   | 40(1) | -12(1) | 5(1)  | -3(1) |
| C(57A) | 40(2) | 42(2)   | 41(2) | -9(2)  | 4(2)  | -1(1) |
| O(65A) | 40(2) | 65(2)   | 54(2) | -4(2)  | 13(2) | -5(2) |
| S(65A) | 44(1) | 42(1)   | 37(1) | 3(1)   | 3(1)  | 6(1)  |
| C(66A) | 42(2) | 66(2)   | 43(2) | -13(2) | -3(2) | 3(2)  |
| C(67A) | 42(2) | 66(2)   | 43(2) | -13(2) | -3(2) | 3(2)  |

---

Table S5. Hydrogen coordinates ( $\times 10^4$ ) and isotropic displacement parameters ( $\text{\AA}^2 \times 10^{-3}$ ) for **7**.

|        | x     | y    | z    | U(eq) |
|--------|-------|------|------|-------|
| H(7A)  | 379   | 3685 | 6817 | 32    |
| H(28A) | 2177  | 4191 | 5954 | 33    |
| H(9B)  | 5667  | 4737 | 4910 | 34    |
| H(25B) | 10329 | 5827 | 7054 | 34    |
| H(26A) | 4196  | 5376 | 5961 | 30    |
| H(25A) | 4924  | 5875 | 5474 | 33    |
| H(23B) | 13312 | 6939 | 6537 | 35    |
| H(29B) | 6494  | 3248 | 6990 | 38    |
| H(26B) | 9406  | 5313 | 6588 | 31    |
| H(31A) | 1054  | 1857 | 6324 | 39    |
| H(16A) | 7389  | 6549 | 7123 | 35    |
| H(23A) | 8342  | 6855 | 5905 | 35    |
| H(28B) | 7481  | 4115 | 6645 | 34    |
| H(10A) | 3209  | 5200 | 7471 | 33    |
| H(9A)  | 922   | 4795 | 7646 | 36    |
| H(22A) | 7585  | 6390 | 6398 | 35    |
| H(32A) | 2158  | 2697 | 6663 | 36    |
| H(19A) | 8949  | 5832 | 8138 | 39    |
| H(16B) | 12065 | 6440 | 5342 | 36    |
| H(10B) | 7998  | 5108 | 5073 | 32    |
| H(17A) | 9251  | 7186 | 7383 | 37    |
| H(22B) | 12379 | 6444 | 6069 | 33    |
| H(29A) | 1060  | 3346 | 5612 | 36    |
| H(32B) | 6489  | 2817 | 5897 | 44    |
| H(17B) | 13856 | 7042 | 5049 | 40    |
| H(20A) | 7071  | 5204 | 7883 | 36    |
| H(7B)  | 5016  | 3800 | 5775 | 32    |
| H(19B) | 13535 | 5549 | 4347 | 41    |
| H(31B) | 5353  | 2004 | 6237 | 46    |
| H(20B) | 11746 | 4940 | 4637 | 37    |
| H(51A) | 10333 | 3206 | 4362 | 56    |
| H(51B) | 8878  | 2730 | 4375 | 56    |
| H(51C) | 10192 | 2557 | 4613 | 56    |
| H(52A) | 8617  | 2539 | 5102 | 51    |

|        |           |          |          |        |
|--------|-----------|----------|----------|--------|
| H(52B) | 7185      | 2678     | 4894     | 51     |
| H(52C) | 7484      | 3154     | 5206     | 51     |
| H(56A) | 7055      | 8292     | 7402     | 61     |
| H(56B) | 6106      | 7602     | 7504     | 61     |
| H(56C) | 6044      | 8329     | 7712     | 61     |
| H(57A) | 4672      | 8269     | 6714     | 61     |
| H(57B) | 5234      | 7558     | 6895     | 61     |
| H(57C) | 6295      | 8240     | 6851     | 61     |
| H(71A) | 8649      | 5298     | 3646     | 78     |
| H(71B) | 7422      | 4717     | 3555     | 78     |
| H(71C) | 9105      | 4504     | 3527     | 78     |
| H(67A) | 8994      | 7621     | 6350     | 76     |
| H(67B) | 10665     | 7806     | 6281     | 76     |
| H(67C) | 9479      | 8442     | 6286     | 76     |
| H(72A) | 6900      | 5021     | 4425     | 79     |
| H(72B) | 6078      | 4968     | 4089     | 79     |
| H(72C) | 7294      | 5576     | 4145     | 79     |
| H(61A) | 7784      | 9668     | 6875     | 92     |
| H(61B) | 6390      | 10053    | 6721     | 92     |
| H(61C) | 7700      | 10535    | 6857     | 92     |
| H(76A) | 6032      | 8874     | 6010     | 86     |
| H(76B) | 6887      | 8197     | 5862     | 86     |
| H(76C) | 6425      | 8190     | 6229     | 86     |
| H(66A) | 10981     | 9218     | 6677     | 76     |
| H(66B) | 12170     | 8601     | 6612     | 76     |
| H(66C) | 11861     | 8871     | 6968     | 76     |
| H(77A) | 3386      | 8246     | 5430     | 95     |
| H(77B) | 5103      | 8143     | 5386     | 95     |
| H(77C) | 4479      | 8871     | 5543     | 95     |
| H(62A) | 7596      | 11258    | 6371     | 92     |
| H(62B) | 6616      | 10807    | 6126     | 92     |
| H(62C) | 8226      | 11049    | 6028     | 92     |
| H(14B) | 10530(50) | 4810(30) | 5108(11) | 35(12) |
| H(61D) | 6692      | 10771    | 6010     | 92     |
| H(61E) | 8305      | 10811    | 5867     | 92     |
| H(61F) | 7742      | 10080    | 6032     | 92     |
| H(62D) | 6358      | 10433    | 6684     | 92     |
| H(62E) | 7479      | 9800     | 6595     | 92     |
| H(62F) | 7812      | 10327    | 6889     | 92     |
| H(14A) | 5730(40)  | 5020(20) | 7454(10) | 19(9)  |

|        |       |      |      |    |
|--------|-------|------|------|----|
| H(56D) | 5950  | 8121 | 6704 | 61 |
| H(56E) | 4512  | 7874 | 6889 | 61 |
| H(56F) | 4487  | 8586 | 6671 | 61 |
| H(57D) | 7159  | 7890 | 7303 | 61 |
| H(57E) | 6540  | 8305 | 7609 | 61 |
| H(57F) | 5541  | 7731 | 7425 | 61 |
| H(66D) | 10302 | 7572 | 6393 | 76 |
| H(66E) | 9631  | 7698 | 6741 | 76 |
| H(66F) | 8578  | 7548 | 6444 | 76 |
| H(67D) | 11781 | 8962 | 6578 | 76 |
| H(67E) | 10707 | 9535 | 6742 | 76 |
| H(67F) | 10866 | 8735 | 6887 | 76 |

---

Table S6. Torsion angles [°] for **7**.

|                             |           |
|-----------------------------|-----------|
| Cl(1B)-C(8B)-C(7B)-C(6B)    | 177.1(3)  |
| Cl(4B)-C(30B)-C(31B)-C(32B) | -178.1(3) |
| Cl(4A)-C(30A)-C(29A)-C(28A) | -178.5(3) |
| N(12A)-C(11A)-C(10A)-C(9A)  | 177.1(3)  |
| N(12B)-C(11B)-C(6B)-N(5B)   | -2.5(4)   |
| N(12B)-C(11B)-C(6B)-C(7B)   | 175.6(3)  |
| N(12B)-C(11B)-C(10B)-C(9B)  | -178.0(3) |
| N(2A)-N(1A)-C(13A)-N(12A)   | 2.0(4)    |
| N(2A)-N(1A)-C(13A)-N(14A)   | 177.9(3)  |
| N(2A)-C(21A)-C(26A)-C(25A)  | -178.5(3) |
| N(2A)-C(21A)-C(22A)-C(23A)  | 177.4(3)  |
| N(2B)-N(1B)-C(13B)-N(12B)   | -1.8(4)   |
| N(2B)-N(1B)-C(13B)-N(14B)   | -178.3(3) |
| N(2B)-C(21B)-C(22B)-C(23B)  | -176.6(3) |
| N(1A)-N(2A)-C(21A)-C(26A)   | -172.6(3) |
| N(1A)-N(2A)-C(21A)-C(22A)   | 8.1(5)    |
| N(1A)-N(2A)-C(3A)-N(12A)    | 4.0(4)    |
| N(1A)-N(2A)-C(3A)-N(4A)     | -176.8(3) |
| N(14B)-C(15B)-C(16B)-C(17B) | -179.4(3) |
| N(14B)-C(15B)-C(20B)-C(19B) | 179.5(3)  |
| N(14A)-C(15A)-C(16A)-C(17A) | -179.7(3) |
| N(14A)-C(15A)-C(20A)-C(19A) | 179.2(3)  |
| N(4B)-N(5B)-C(27B)-C(28B)   | 9.6(5)    |
| N(4B)-N(5B)-C(27B)-C(32B)   | -167.8(3) |
| N(4B)-N(5B)-C(6B)-C(11B)    | 41.1(4)   |
| N(4B)-N(5B)-C(6B)-C(7B)     | -136.9(3) |
| N(4A)-N(5A)-C(27A)-C(28A)   | -17.4(4)  |
| N(4A)-N(5A)-C(27A)-C(32A)   | 159.5(3)  |
| N(4A)-N(5A)-C(6A)-C(7A)     | 135.8(3)  |
| N(4A)-N(5A)-C(6A)-C(11A)    | -42.4(4)  |
| N(5A)-N(4A)-C(3A)-N(12A)    | -7.4(5)   |
| N(5A)-N(4A)-C(3A)-N(2A)     | 173.6(3)  |
| N(5A)-C(27A)-C(32A)-C(31A)  | -178.0(3) |
| N(5A)-C(6A)-C(11A)-N(12A)   | 2.0(4)    |
| N(5A)-C(6A)-C(11A)-C(10A)   | 177.8(3)  |
| N(5B)-N(4B)-C(3B)-N(12B)    | 5.8(5)    |
| N(5B)-N(4B)-C(3B)-N(2B)     | -175.9(3) |
| N(5B)-C(27B)-C(32B)-C(31B)  | -178.8(4) |



|                             |           |
|-----------------------------|-----------|
| N(5B)-C(6B)-C(7B)-C(8B)     | -178.9(3) |
| N(1B)-N(2B)-C(3B)-N(12B)    | -3.9(4)   |
| N(1B)-N(2B)-C(3B)-N(4B)     | 177.5(3)  |
| N(1B)-N(2B)-C(21B)-C(26B)   | -178.8(3) |
| N(1B)-N(2B)-C(21B)-C(22B)   | 1.3(5)    |
| C(13A)-N(12A)-C(3A)-N(2A)   | -2.6(4)   |
| C(13A)-N(12A)-C(3A)-N(4A)   | 178.1(3)  |
| C(13A)-N(12A)-C(11A)-C(6A)  | 174.1(3)  |
| C(13A)-N(12A)-C(11A)-C(10A) | -1.4(6)   |
| C(13A)-N(14A)-C(15A)-C(16A) | 17.3(5)   |
| C(13A)-N(14A)-C(15A)-C(20A) | -163.4(3) |
| C(21A)-N(2A)-N(1A)-C(13A)   | -178.9(3) |
| C(21A)-N(2A)-C(3A)-N(12A)   | 178.4(3)  |
| C(21A)-N(2A)-C(3A)-N(4A)    | -2.4(6)   |
| C(21A)-C(26A)-C(25A)-C(24A) | 1.1(5)    |
| C(7A)-C(6A)-C(11A)-N(12A)   | -176.3(3) |
| C(7A)-C(6A)-C(11A)-C(10A)   | -0.5(5)   |
| C(28A)-C(27A)-C(32A)-C(31A) | -1.1(5)   |
| C(27A)-N(5A)-C(6A)-C(7A)    | -5.9(5)   |
| C(27A)-N(5A)-C(6A)-C(11A)   | 175.9(3)  |
| C(27A)-C(28A)-C(29A)-C(30A) | -0.7(5)   |
| C(3A)-N(12A)-C(13A)-N(1A)   | 0.3(4)    |
| C(3A)-N(12A)-C(13A)-N(14A)  | -175.9(3) |
| C(3A)-N(12A)-C(11A)-C(6A)   | 32.8(4)   |
| C(3A)-N(12A)-C(11A)-C(10A)  | -142.7(4) |
| C(3A)-N(2A)-N(1A)-C(13A)    | -3.8(4)   |
| C(3A)-N(2A)-C(21A)-C(26A)   | 13.4(5)   |
| C(3A)-N(2A)-C(21A)-C(22A)   | -166.0(3) |
| C(3A)-N(4A)-N(5A)-C(27A)    | -170.6(3) |
| C(3A)-N(4A)-N(5A)-C(6A)     | 44.6(4)   |
| C(3B)-N(12B)-C(11B)-C(6B)   | -31.3(4)  |
| C(3B)-N(12B)-C(11B)-C(10B)  | 143.9(3)  |
| C(3B)-N(12B)-C(13B)-N(14B)  | 176.3(3)  |
| C(3B)-N(12B)-C(13B)-N(1B)   | -0.5(4)   |
| C(3B)-N(2B)-N(1B)-C(13B)    | 3.6(4)    |
| C(3B)-N(2B)-C(21B)-C(26B)   | -4.7(5)   |
| C(3B)-N(2B)-C(21B)-C(22B)   | 175.4(3)  |
| C(3B)-N(4B)-N(5B)-C(27B)    | 164.3(3)  |
| C(3B)-N(4B)-N(5B)-C(6B)     | -42.3(4)  |
| C(6A)-N(5A)-C(27A)-C(28A)   | 125.4(4)  |

|                             |           |
|-----------------------------|-----------|
| C(6A)-N(5A)-C(27A)-C(32A)   | -57.7(4)  |
| C(6A)-C(7A)-C(8A)-Cl(1A)    | 180.0(3)  |
| C(6A)-C(7A)-C(8A)-C(9A)     | 1.7(6)    |
| C(6A)-C(11A)-C(10A)-C(9A)   | 1.9(5)    |
| C(9B)-C(8B)-C(7B)-C(6B)     | -3.7(5)   |
| C(25B)-C(26B)-C(21B)-N(2B)  | 177.1(3)  |
| C(25B)-C(26B)-C(21B)-C(22B) | -3.0(5)   |
| C(26A)-C(21A)-C(22A)-C(23A) | -1.9(5)   |
| C(26A)-C(25A)-C(24A)-Cl(3A) | 178.7(3)  |
| C(26A)-C(25A)-C(24A)-C(23A) | -2.0(5)   |
| C(15A)-N(14A)-C(13A)-N(12A) | 174.0(3)  |
| C(15A)-N(14A)-C(13A)-N(1A)  | -1.6(6)   |
| C(15A)-C(16A)-C(17A)-C(18A) | -0.1(6)   |
| C(11B)-N(12B)-C(3B)-N(2B)   | -147.4(3) |
| C(11B)-N(12B)-C(3B)-N(4B)   | 31.3(5)   |
| C(11B)-N(12B)-C(13B)-N(14B) | -40.0(5)  |
| C(11B)-N(12B)-C(13B)-N(1B)  | 143.2(3)  |
| C(11B)-C(6B)-C(7B)-C(8B)    | 3.1(5)    |
| C(29B)-C(28B)-C(27B)-N(5B)  | -178.5(3) |
| C(29B)-C(28B)-C(27B)-C(32B) | -1.0(5)   |
| C(29B)-C(30B)-C(31B)-C(32B) | 1.3(6)    |
| C(26B)-C(25B)-C(24B)-Cl(3B) | -178.0(3) |
| C(26B)-C(25B)-C(24B)-C(23B) | 2.5(5)    |
| C(26B)-C(21B)-C(22B)-C(23B) | 3.5(5)    |
| C(11A)-N(12A)-C(13A)-N(1A)  | -143.3(3) |
| C(11A)-N(12A)-C(13A)-N(14A) | 40.5(5)   |
| C(11A)-N(12A)-C(3A)-N(2A)   | 147.4(3)  |
| C(11A)-N(12A)-C(3A)-N(4A)   | -31.8(5)  |
| C(11A)-C(10A)-C(9A)-C(8A)   | -1.5(5)   |
| C(31A)-C(30A)-C(29A)-C(28A) | 0.2(6)    |
| C(16A)-C(15A)-C(20A)-C(19A) | -1.4(5)   |
| C(16A)-C(17A)-C(18A)-Cl(2A) | 179.0(3)  |
| C(16A)-C(17A)-C(18A)-C(19A) | -0.2(6)   |
| C(21B)-N(2B)-N(1B)-C(13B)   | 178.7(3)  |
| C(21B)-N(2B)-C(3B)-N(12B)   | -178.3(3) |
| C(21B)-N(2B)-C(3B)-N(4B)    | 3.1(6)    |
| C(24B)-C(25B)-C(26B)-C(21B) | 0.0(5)    |
| C(24B)-C(23B)-C(22B)-C(21B) | -1.0(5)   |
| C(28B)-C(29B)-C(30B)-Cl(4B) | -179.3(3) |
| C(28B)-C(29B)-C(30B)-C(31B) | 1.3(6)    |

|                             |           |
|-----------------------------|-----------|
| C(28B)-C(27B)-C(32B)-C(31B) | 3.7(6)    |
| C(27B)-N(5B)-C(6B)-C(11B)   | -168.0(3) |
| C(27B)-N(5B)-C(6B)-C(7B)    | 14.0(5)   |
| C(27B)-C(32B)-C(31B)-C(30B) | -3.8(7)   |
| C(10A)-C(9A)-C(8A)-Cl(1A)   | -178.6(3) |
| C(10A)-C(9A)-C(8A)-C(7A)    | -0.3(6)   |
| C(13B)-N(12B)-C(3B)-N(2B)   | 2.6(4)    |
| C(13B)-N(12B)-C(3B)-N(4B)   | -178.7(3) |
| C(13B)-N(12B)-C(11B)-C(6B)  | -172.7(3) |
| C(13B)-N(12B)-C(11B)-C(10B) | 2.5(5)    |
| C(13B)-N(14B)-C(15B)-C(16B) | -20.8(6)  |
| C(13B)-N(14B)-C(15B)-C(20B) | 161.8(3)  |
| C(15B)-N(14B)-C(13B)-N(12B) | -177.0(3) |
| C(15B)-N(14B)-C(13B)-N(1B)  | -0.8(6)   |
| C(15B)-C(16B)-C(17B)-C(18B) | 0.8(6)    |
| C(22A)-C(21A)-C(26A)-C(25A) | 0.8(5)    |
| C(22A)-C(23A)-C(24A)-Cl(3A) | -179.8(3) |
| C(22A)-C(23A)-C(24A)-C(25A) | 0.9(5)    |
| C(30A)-C(31A)-C(32A)-C(27A) | 0.6(6)    |
| C(6B)-N(5B)-C(27B)-C(28B)   | -141.8(4) |
| C(6B)-N(5B)-C(27B)-C(32B)   | 40.8(5)   |
| C(6B)-C(11B)-C(10B)-C(9B)   | -3.1(5)   |
| C(32A)-C(31A)-C(30A)-Cl(4A) | 178.6(3)  |
| C(32A)-C(31A)-C(30A)-C(29A) | -0.2(6)   |
| C(16B)-C(15B)-C(20B)-C(19B) | 1.9(5)    |
| C(16B)-C(17B)-C(18B)-Cl(2B) | 179.3(3)  |
| C(16B)-C(17B)-C(18B)-C(19B) | 0.3(6)    |
| C(10B)-C(9B)-C(8B)-Cl(1B)   | 180.0(3)  |
| C(10B)-C(9B)-C(8B)-C(7B)    | 0.8(5)    |
| C(10B)-C(11B)-C(6B)-N(5B)   | -177.9(3) |
| C(10B)-C(11B)-C(6B)-C(7B)   | 0.2(5)    |
| C(8B)-C(9B)-C(10B)-C(11B)   | 2.6(5)    |
| C(22B)-C(23B)-C(24B)-Cl(3B) | 178.6(3)  |
| C(22B)-C(23B)-C(24B)-C(25B) | -2.0(5)   |
| C(24A)-C(23A)-C(22A)-C(21A) | 1.1(5)    |
| C(29A)-C(28A)-C(27A)-N(5A)  | 178.0(3)  |
| C(29A)-C(28A)-C(27A)-C(32A) | 1.1(5)    |
| C(20A)-C(15A)-C(16A)-C(17A) | 0.9(5)    |
| C(20A)-C(19A)-C(18A)-Cl(2A) | -179.5(3) |
| C(20A)-C(19A)-C(18A)-C(17A) | -0.2(6)   |

|                             |           |
|-----------------------------|-----------|
| C(18A)-C(19A)-C(20A)-C(15A) | 1.1(6)    |
| C(30B)-C(29B)-C(28B)-C(27B) | -1.4(6)   |
| C(20B)-C(15B)-C(16B)-C(17B) | -1.9(5)   |
| C(20B)-C(19B)-C(18B)-Cl(2B) | -179.4(3) |
| C(20B)-C(19B)-C(18B)-C(17B) | -0.4(6)   |
| C(18B)-C(19B)-C(20B)-C(15B) | -0.8(6)   |
| C(8A)-C(7A)-C(6A)-N(5A)     | -179.4(3) |
| C(8A)-C(7A)-C(6A)-C(11A)    | -1.2(5)   |

---

Table S7. Hydrogen bonds for **7** [Å and °].

| D-H...A                  | d(D-H)  | d(H...A) | d(D...A) | <(DHA) |
|--------------------------|---------|----------|----------|--------|
| N(14B)-H(14B)...O(50)    | 0.84(5) | 1.95(5)  | 2.789(4) | 173(4) |
| N(14A)-H(14A)...O(55)#1  | 0.85(4) | 1.97(4)  | 2.814(4) | 172(4) |
| N(14A)-H(14A)...O(55A)#1 | 0.85(4) | 1.93(5)  | 2.76(3)  | 165(4) |

Symmetry transformations used to generate equivalent atoms:

#1 -x+1,y-1/2,-z+3/2

### S3. EPR spectra

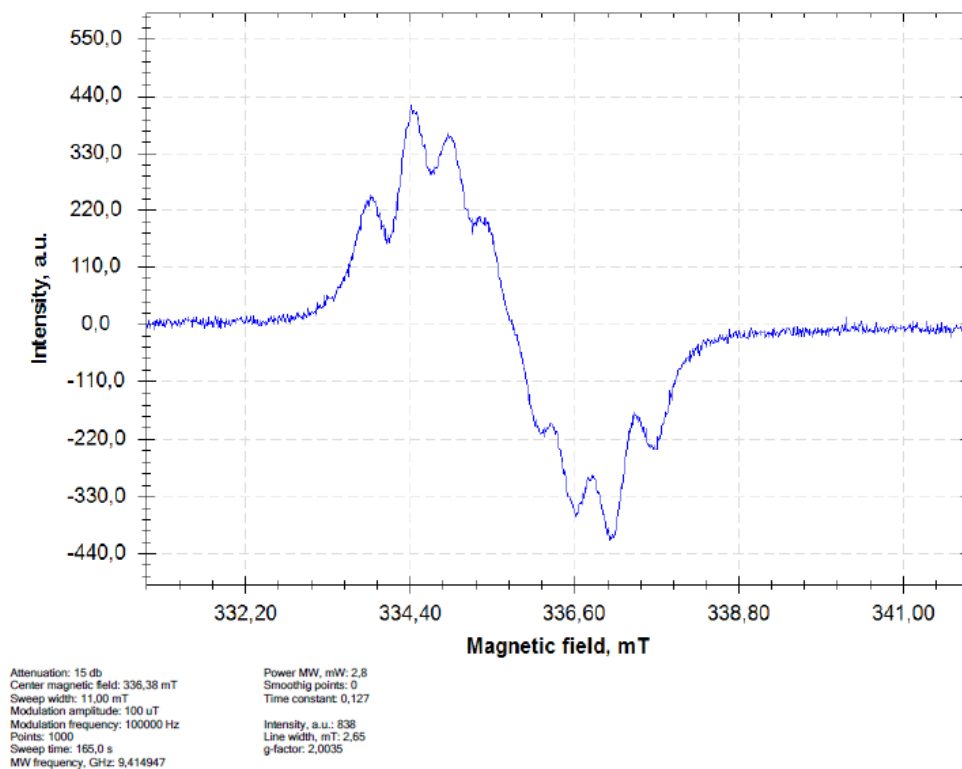

**EPR spectrum of compound 6l**

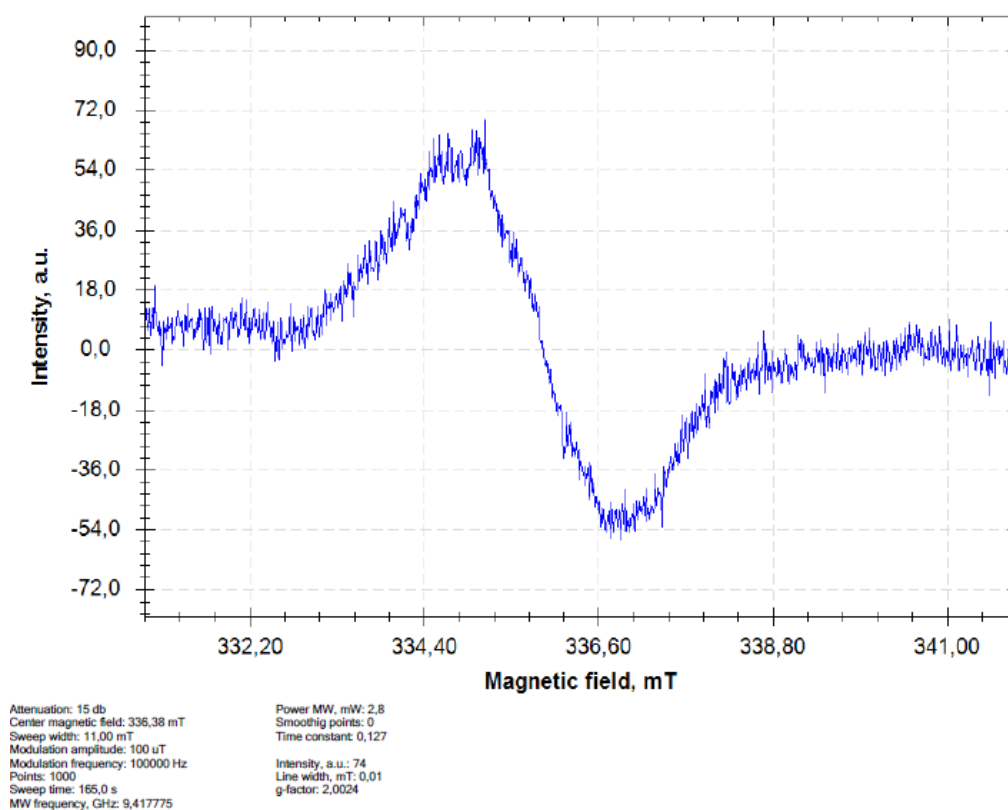

**EPR spectrum of compound 7**

### S4. NMR and HRMS spectra

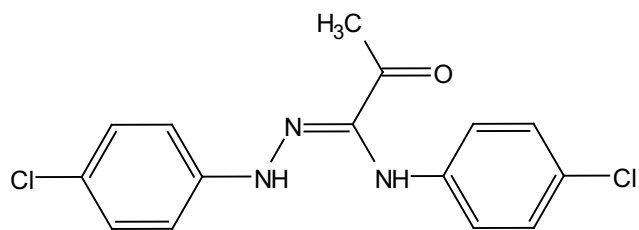

**1a**

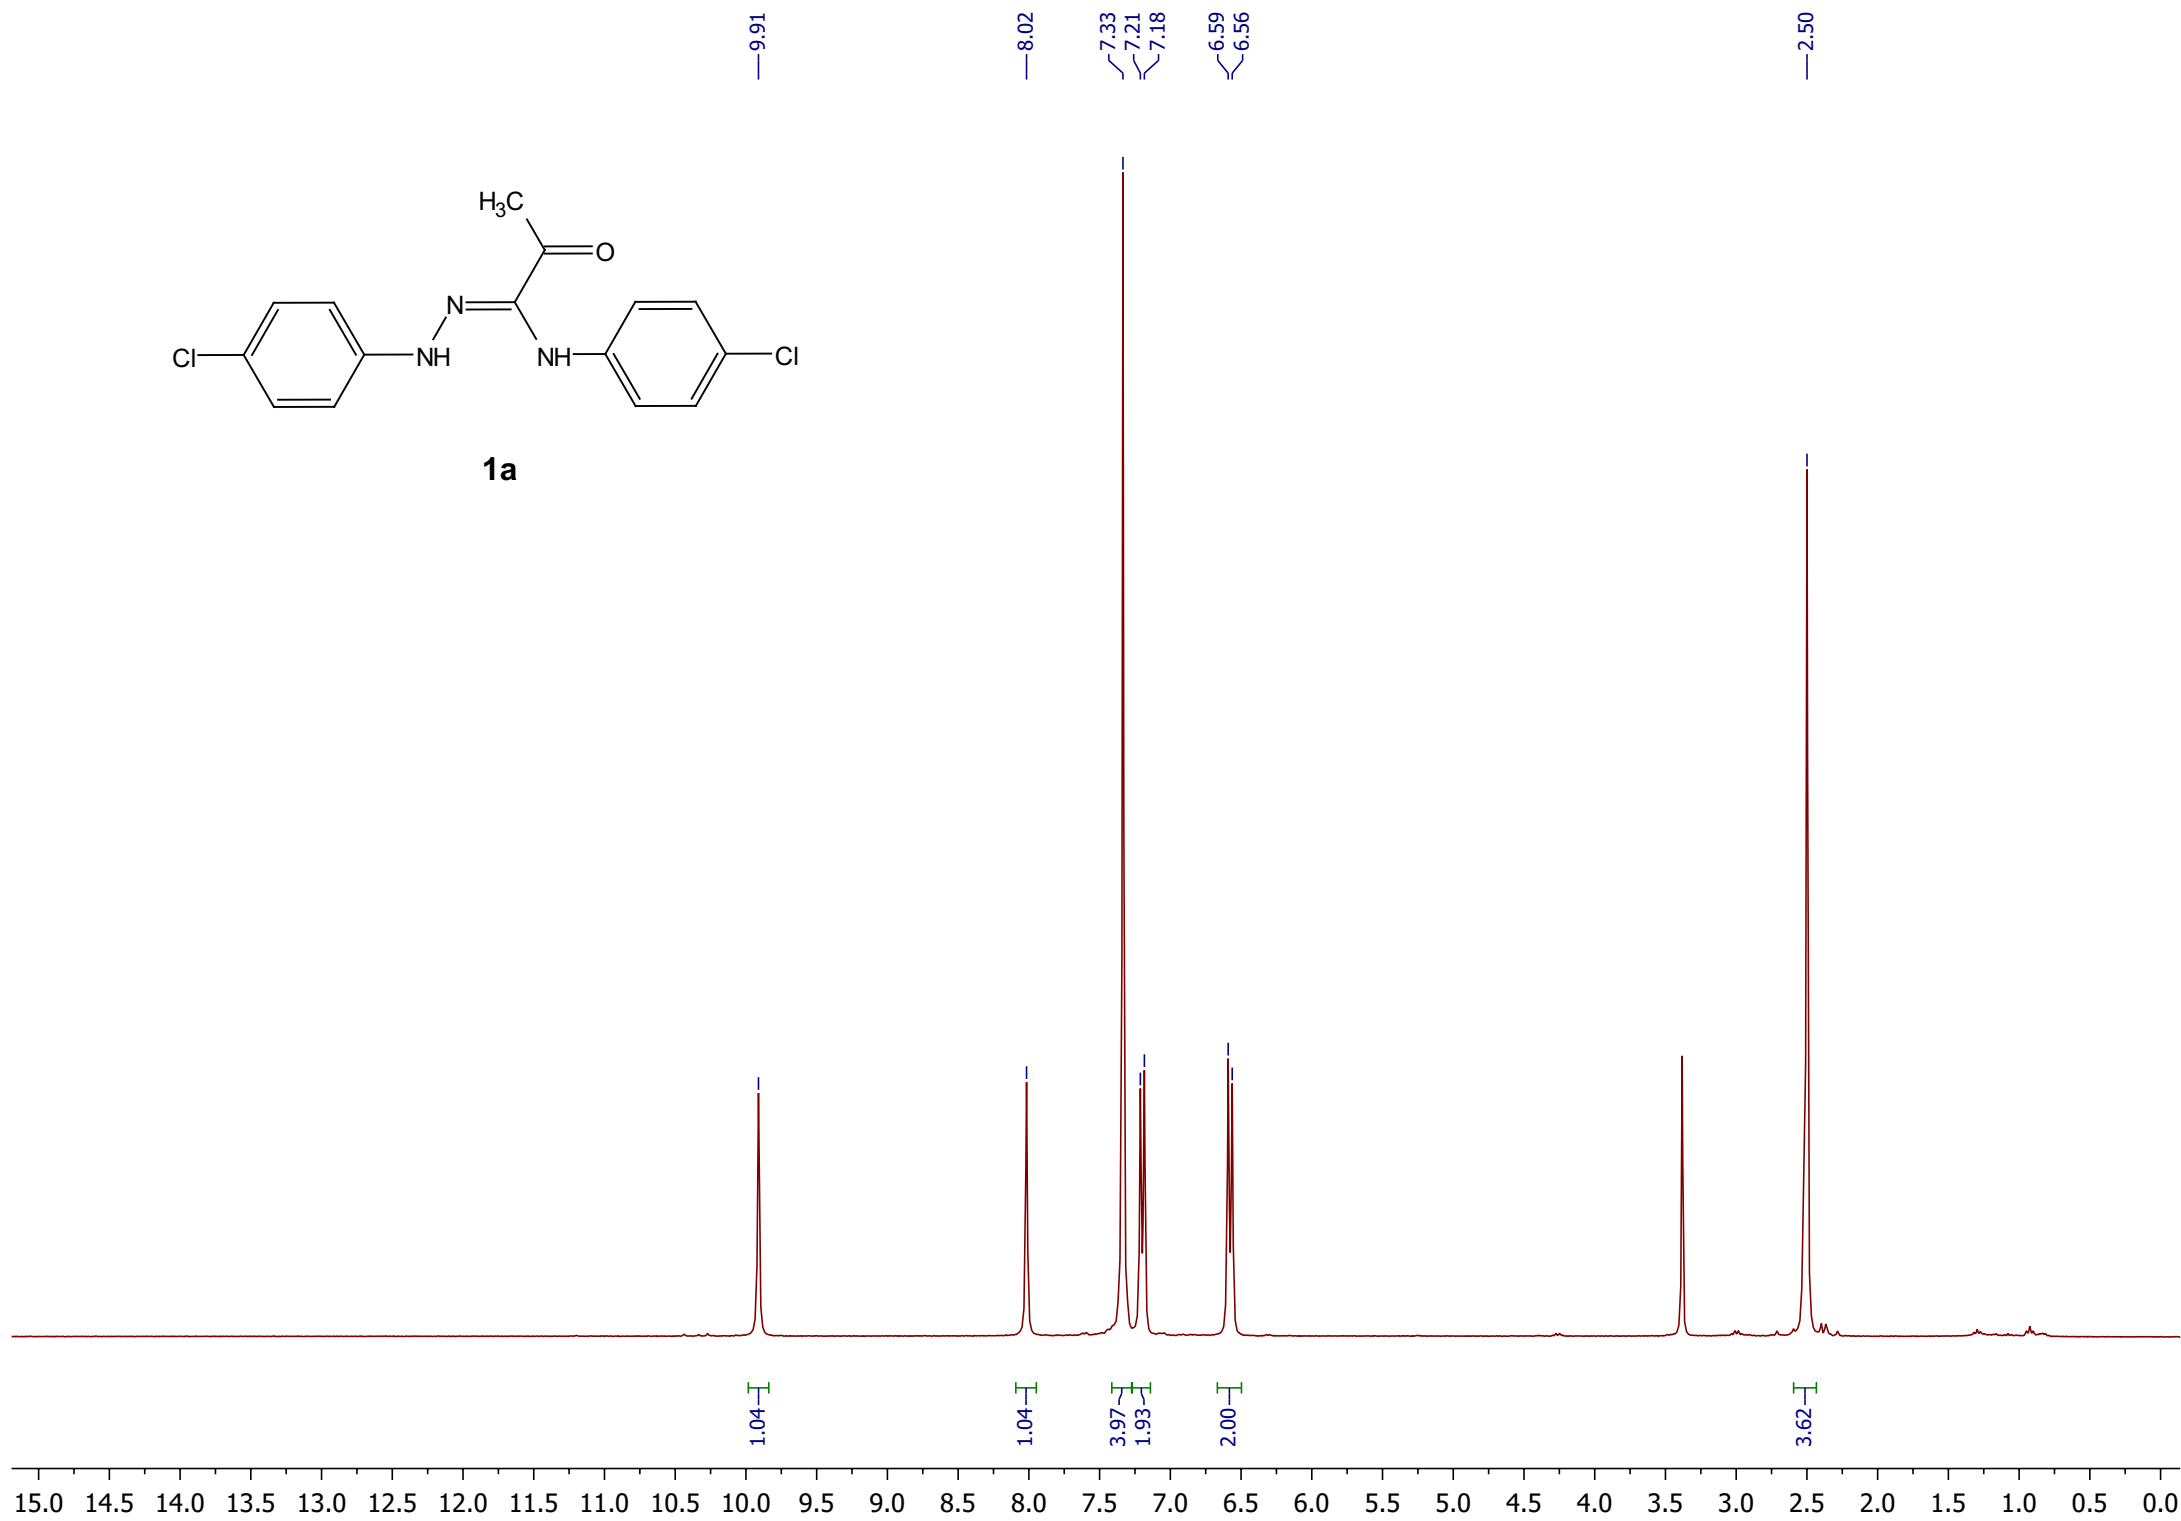



**1a**

—192.91

—142.84

—141.28

—135.92

—128.90

—128.29

—124.50

—122.65

—117.30

—115.46

—24.87

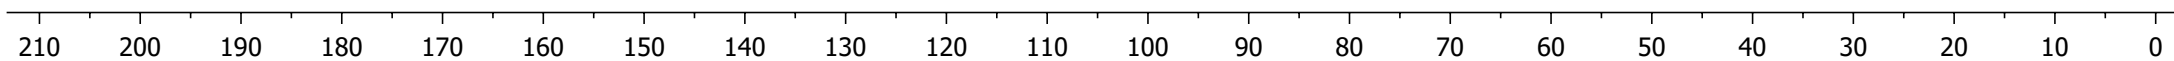



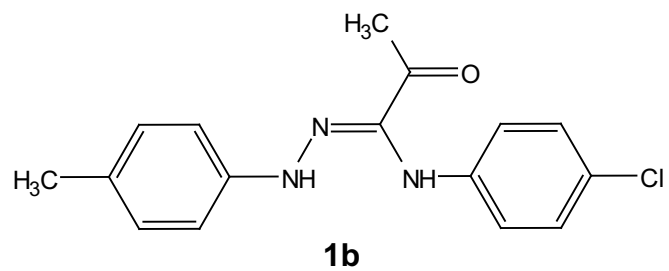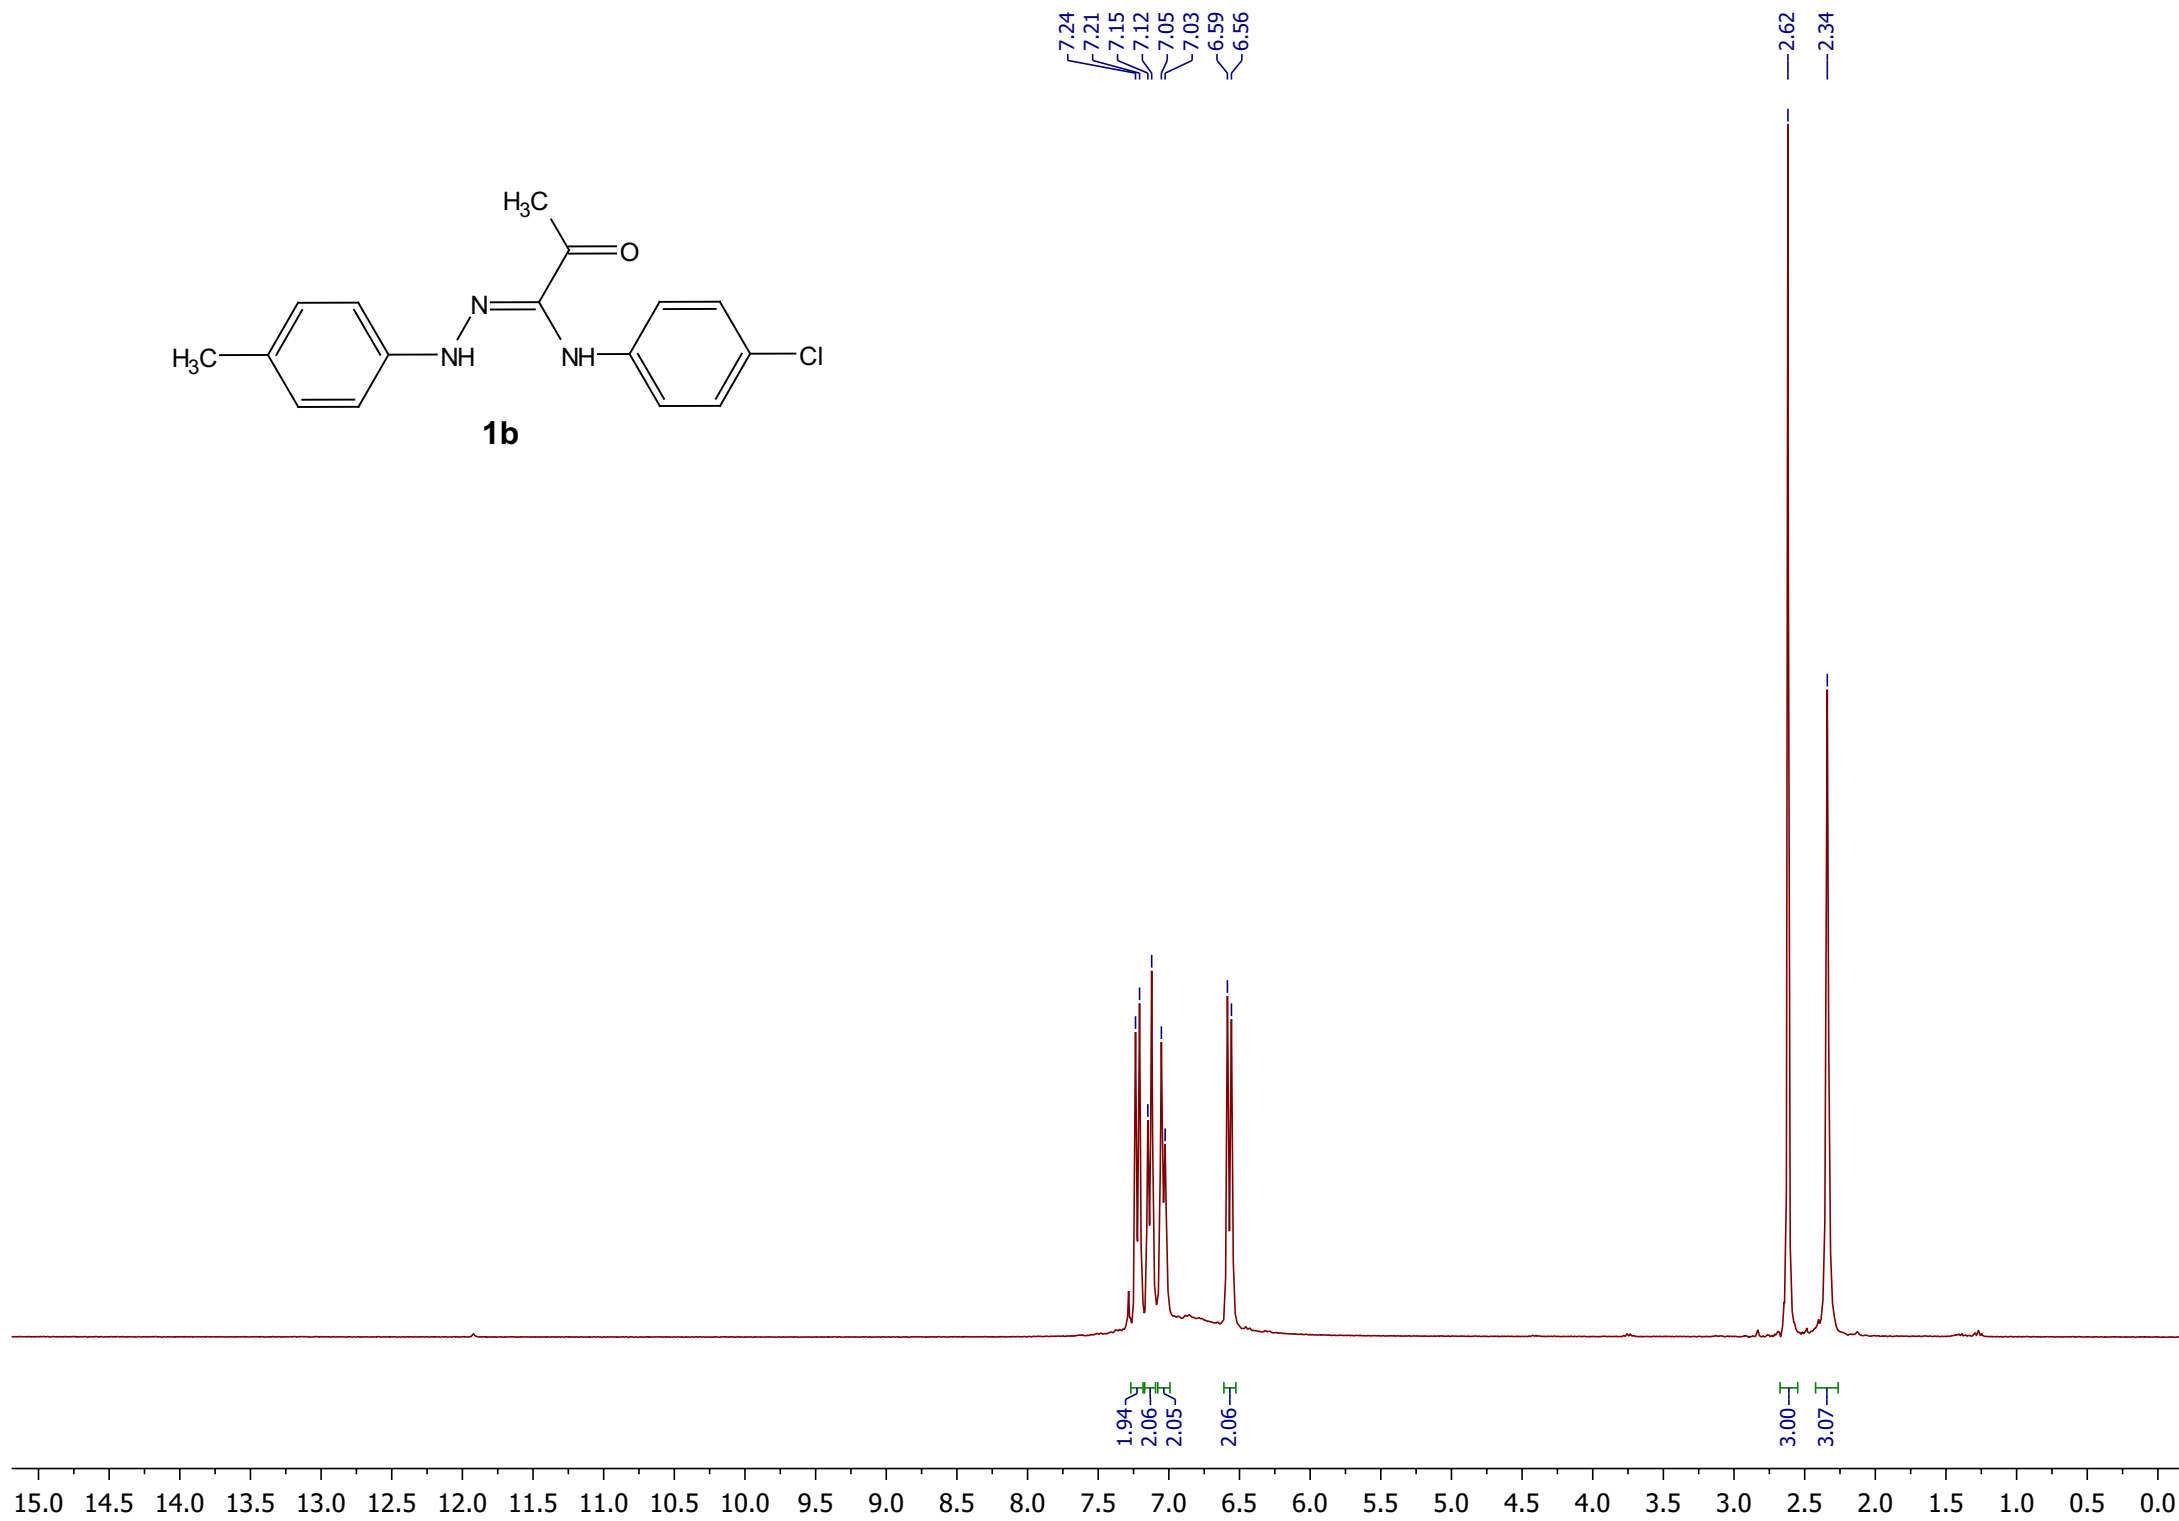

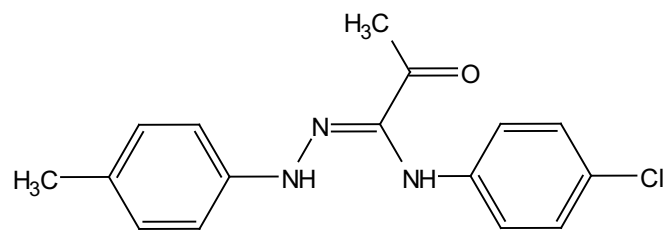

**1b**

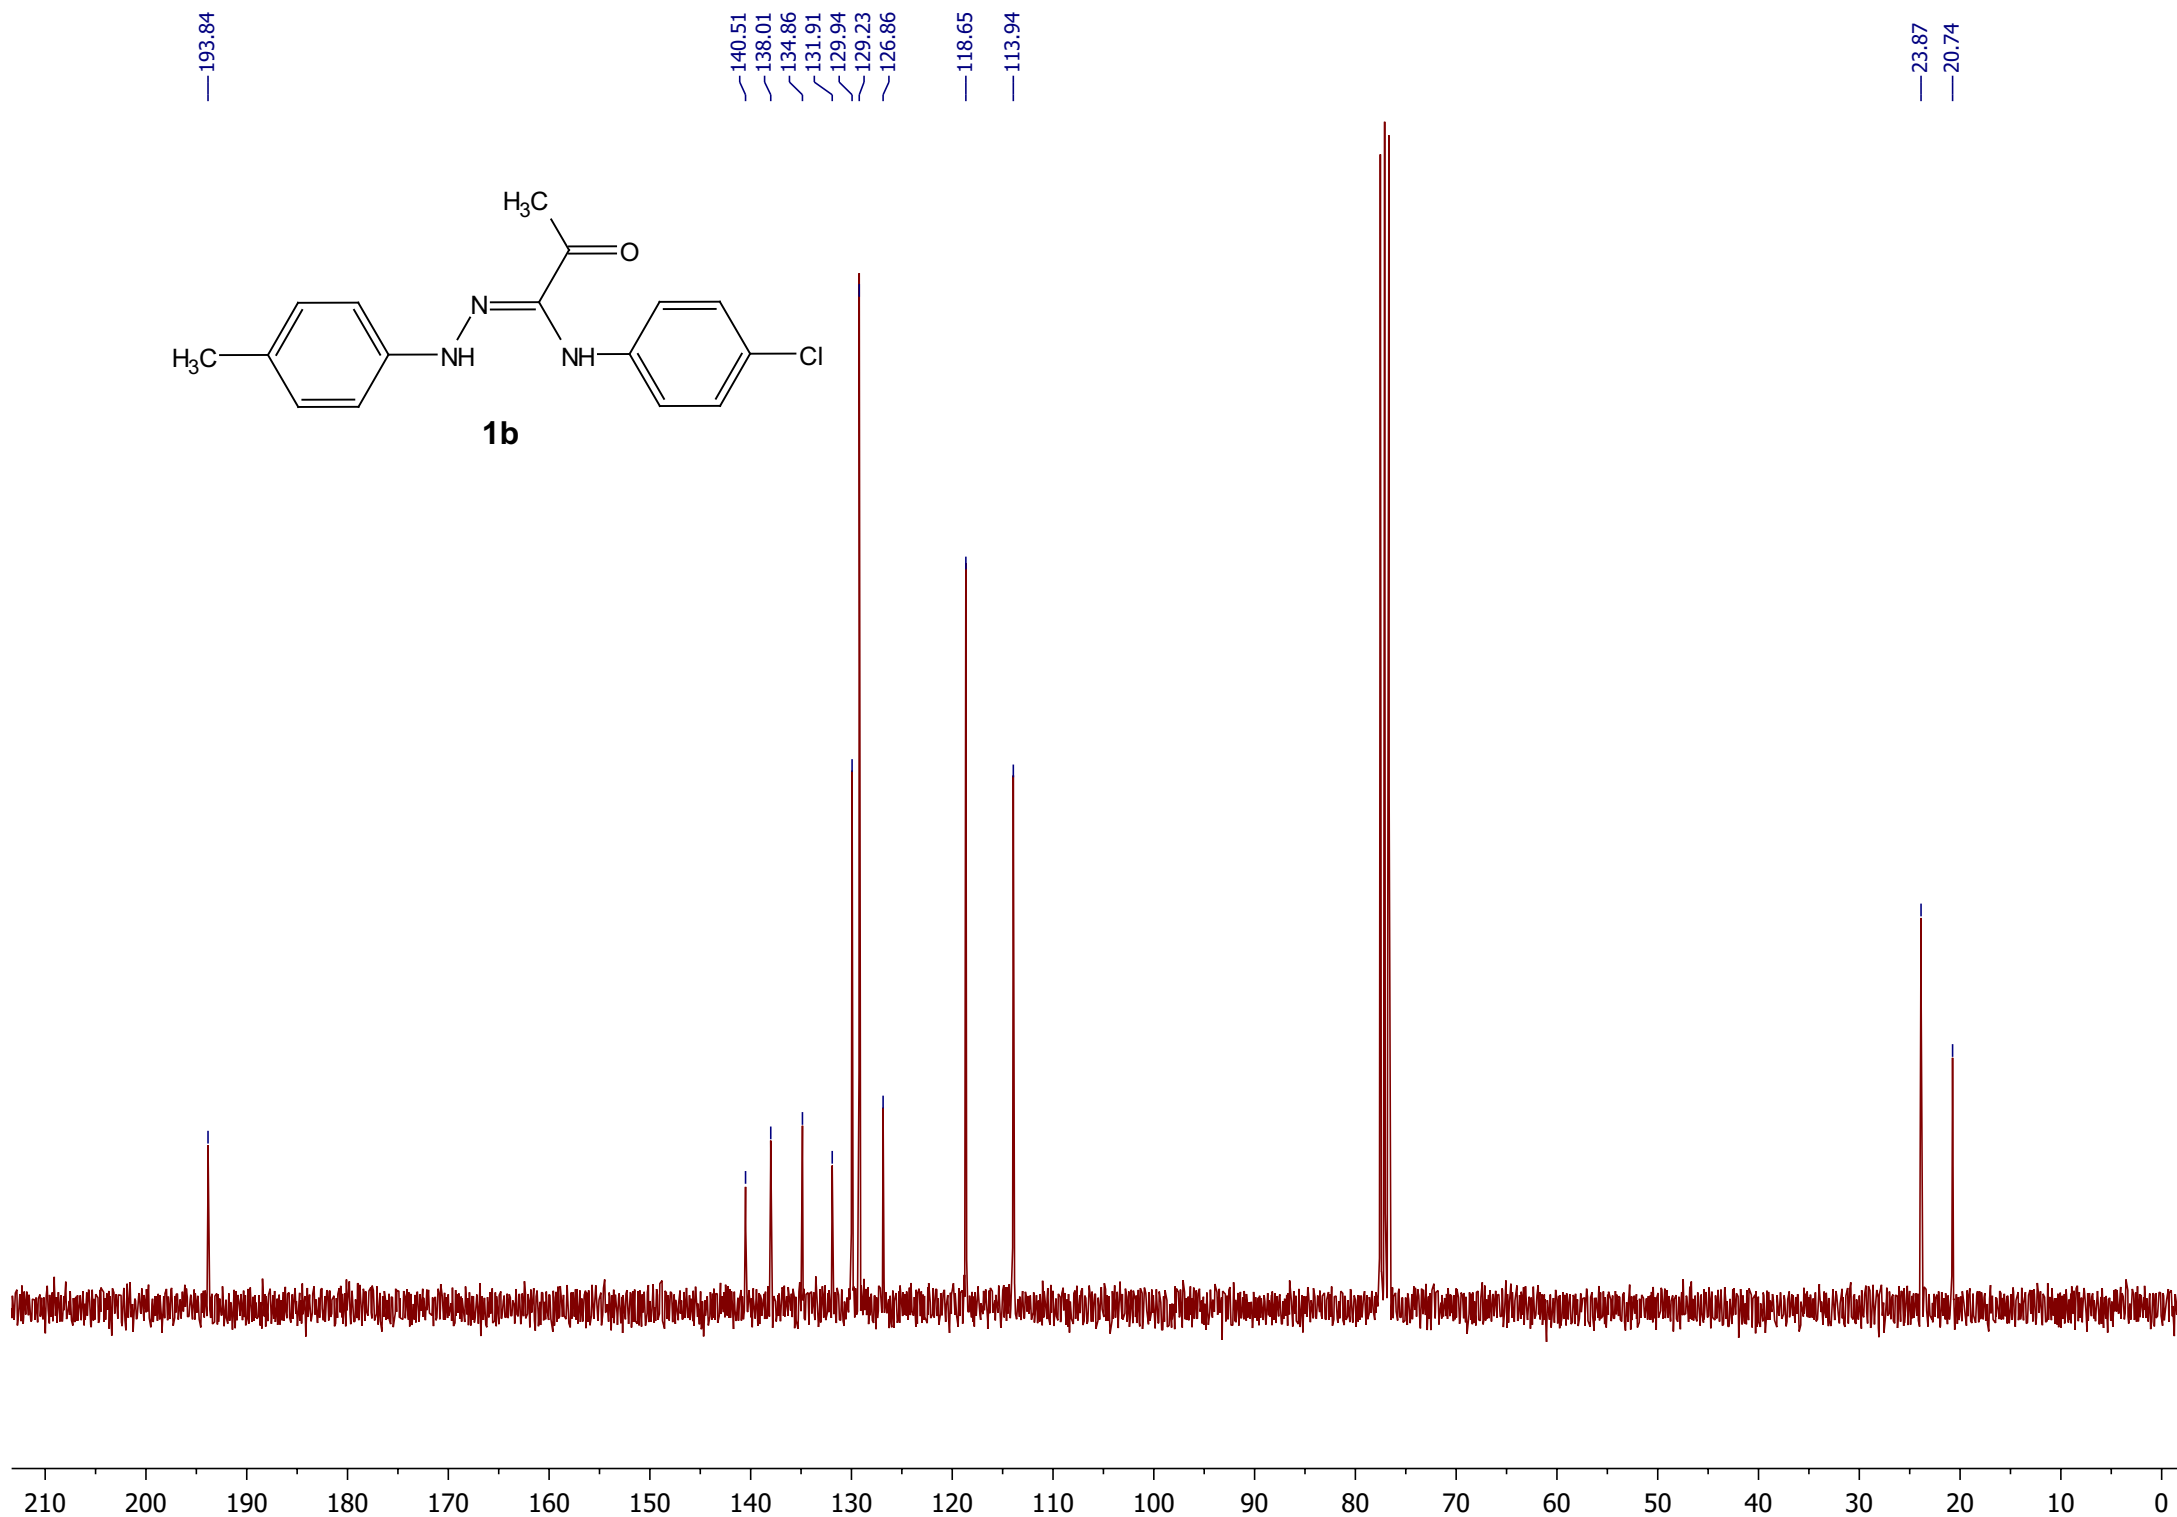

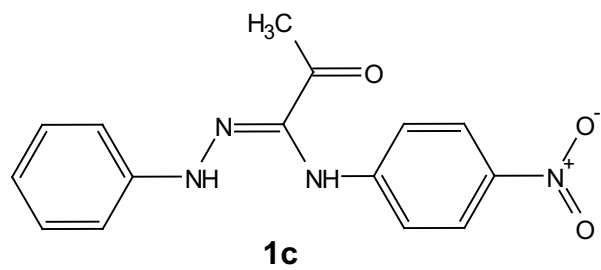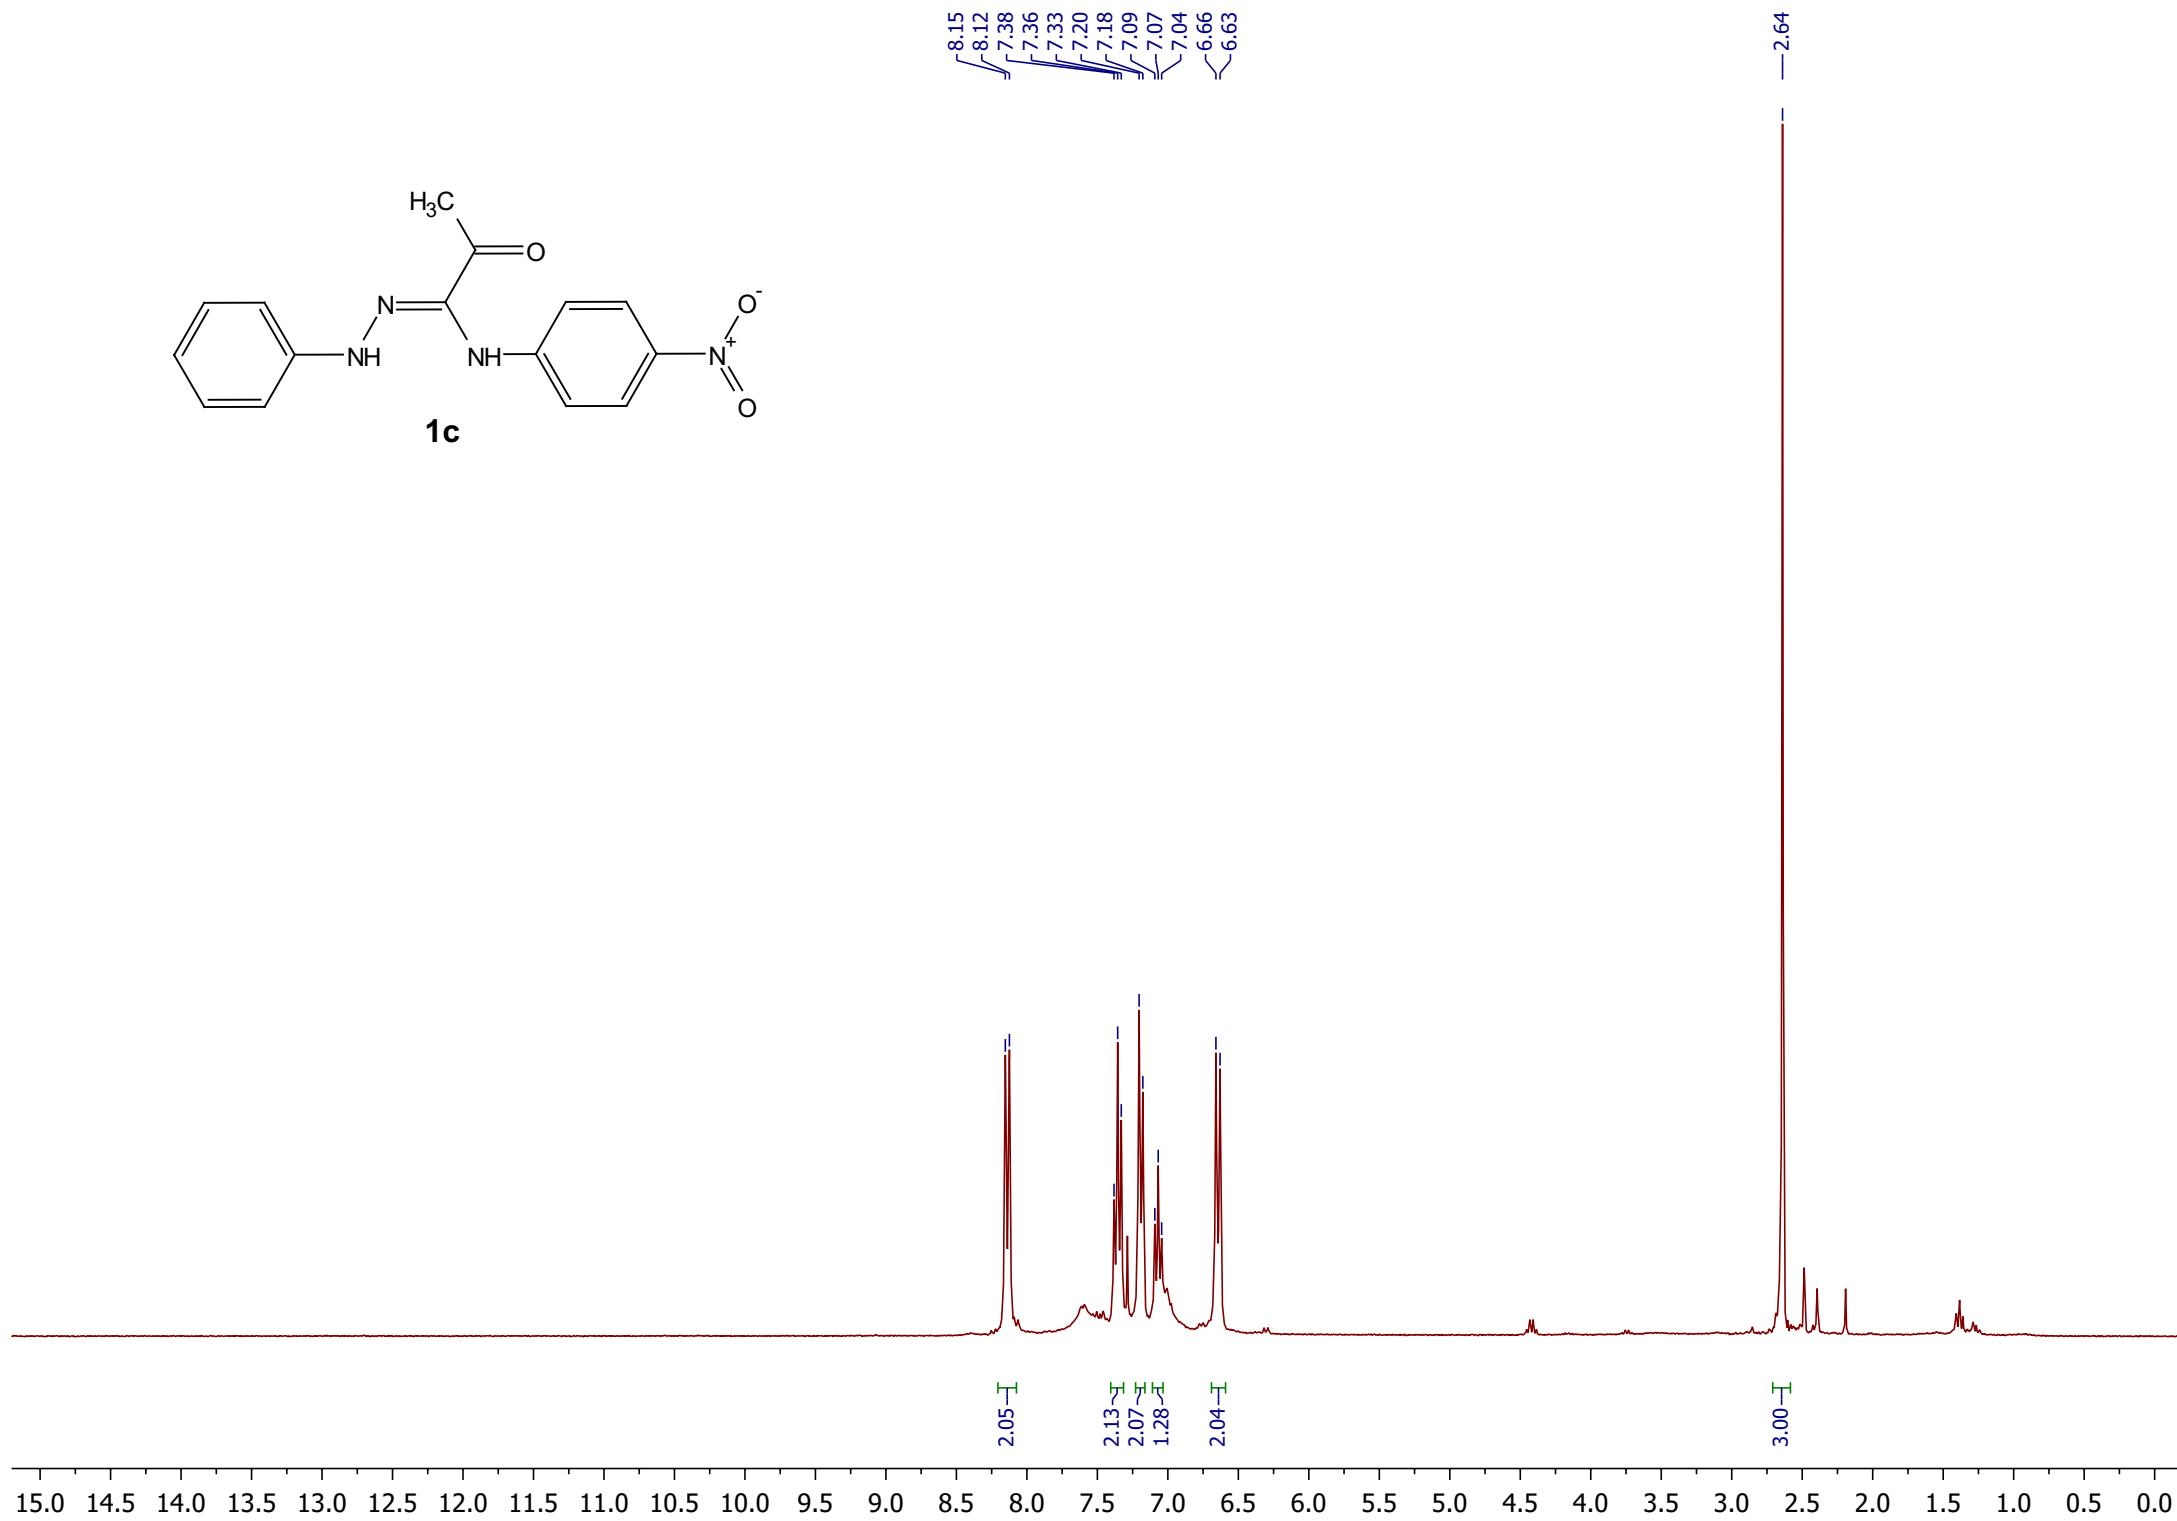

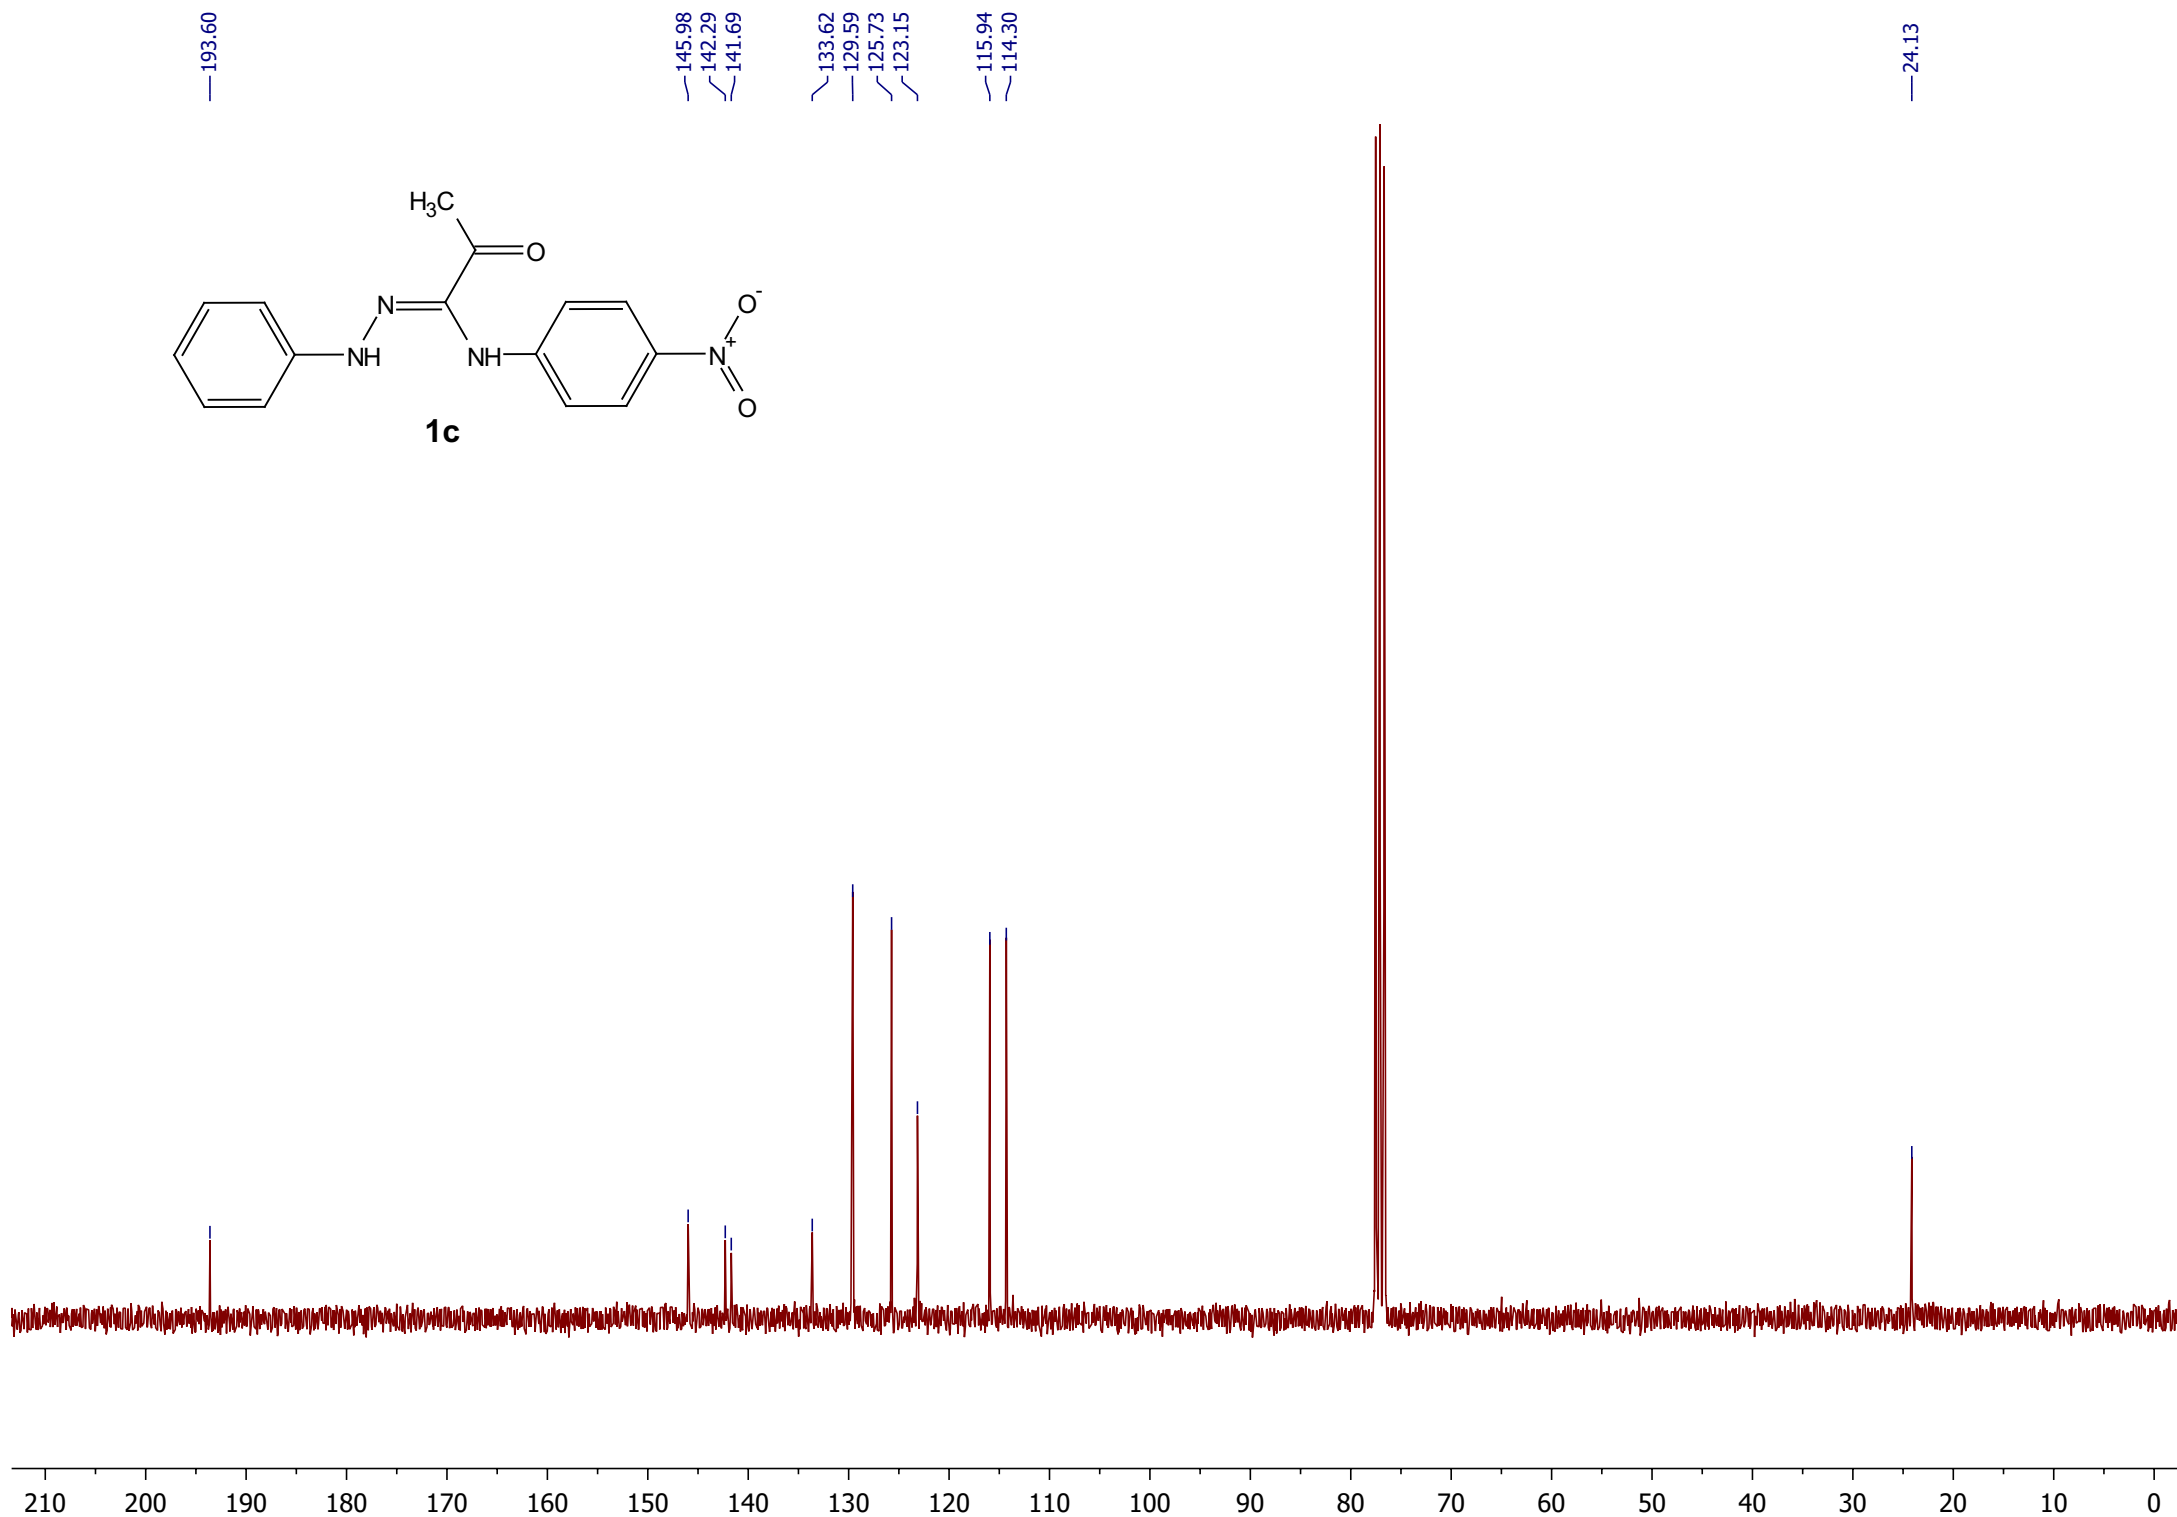

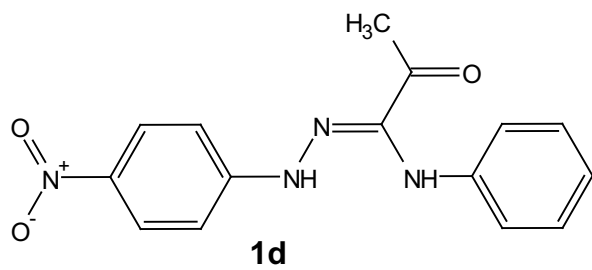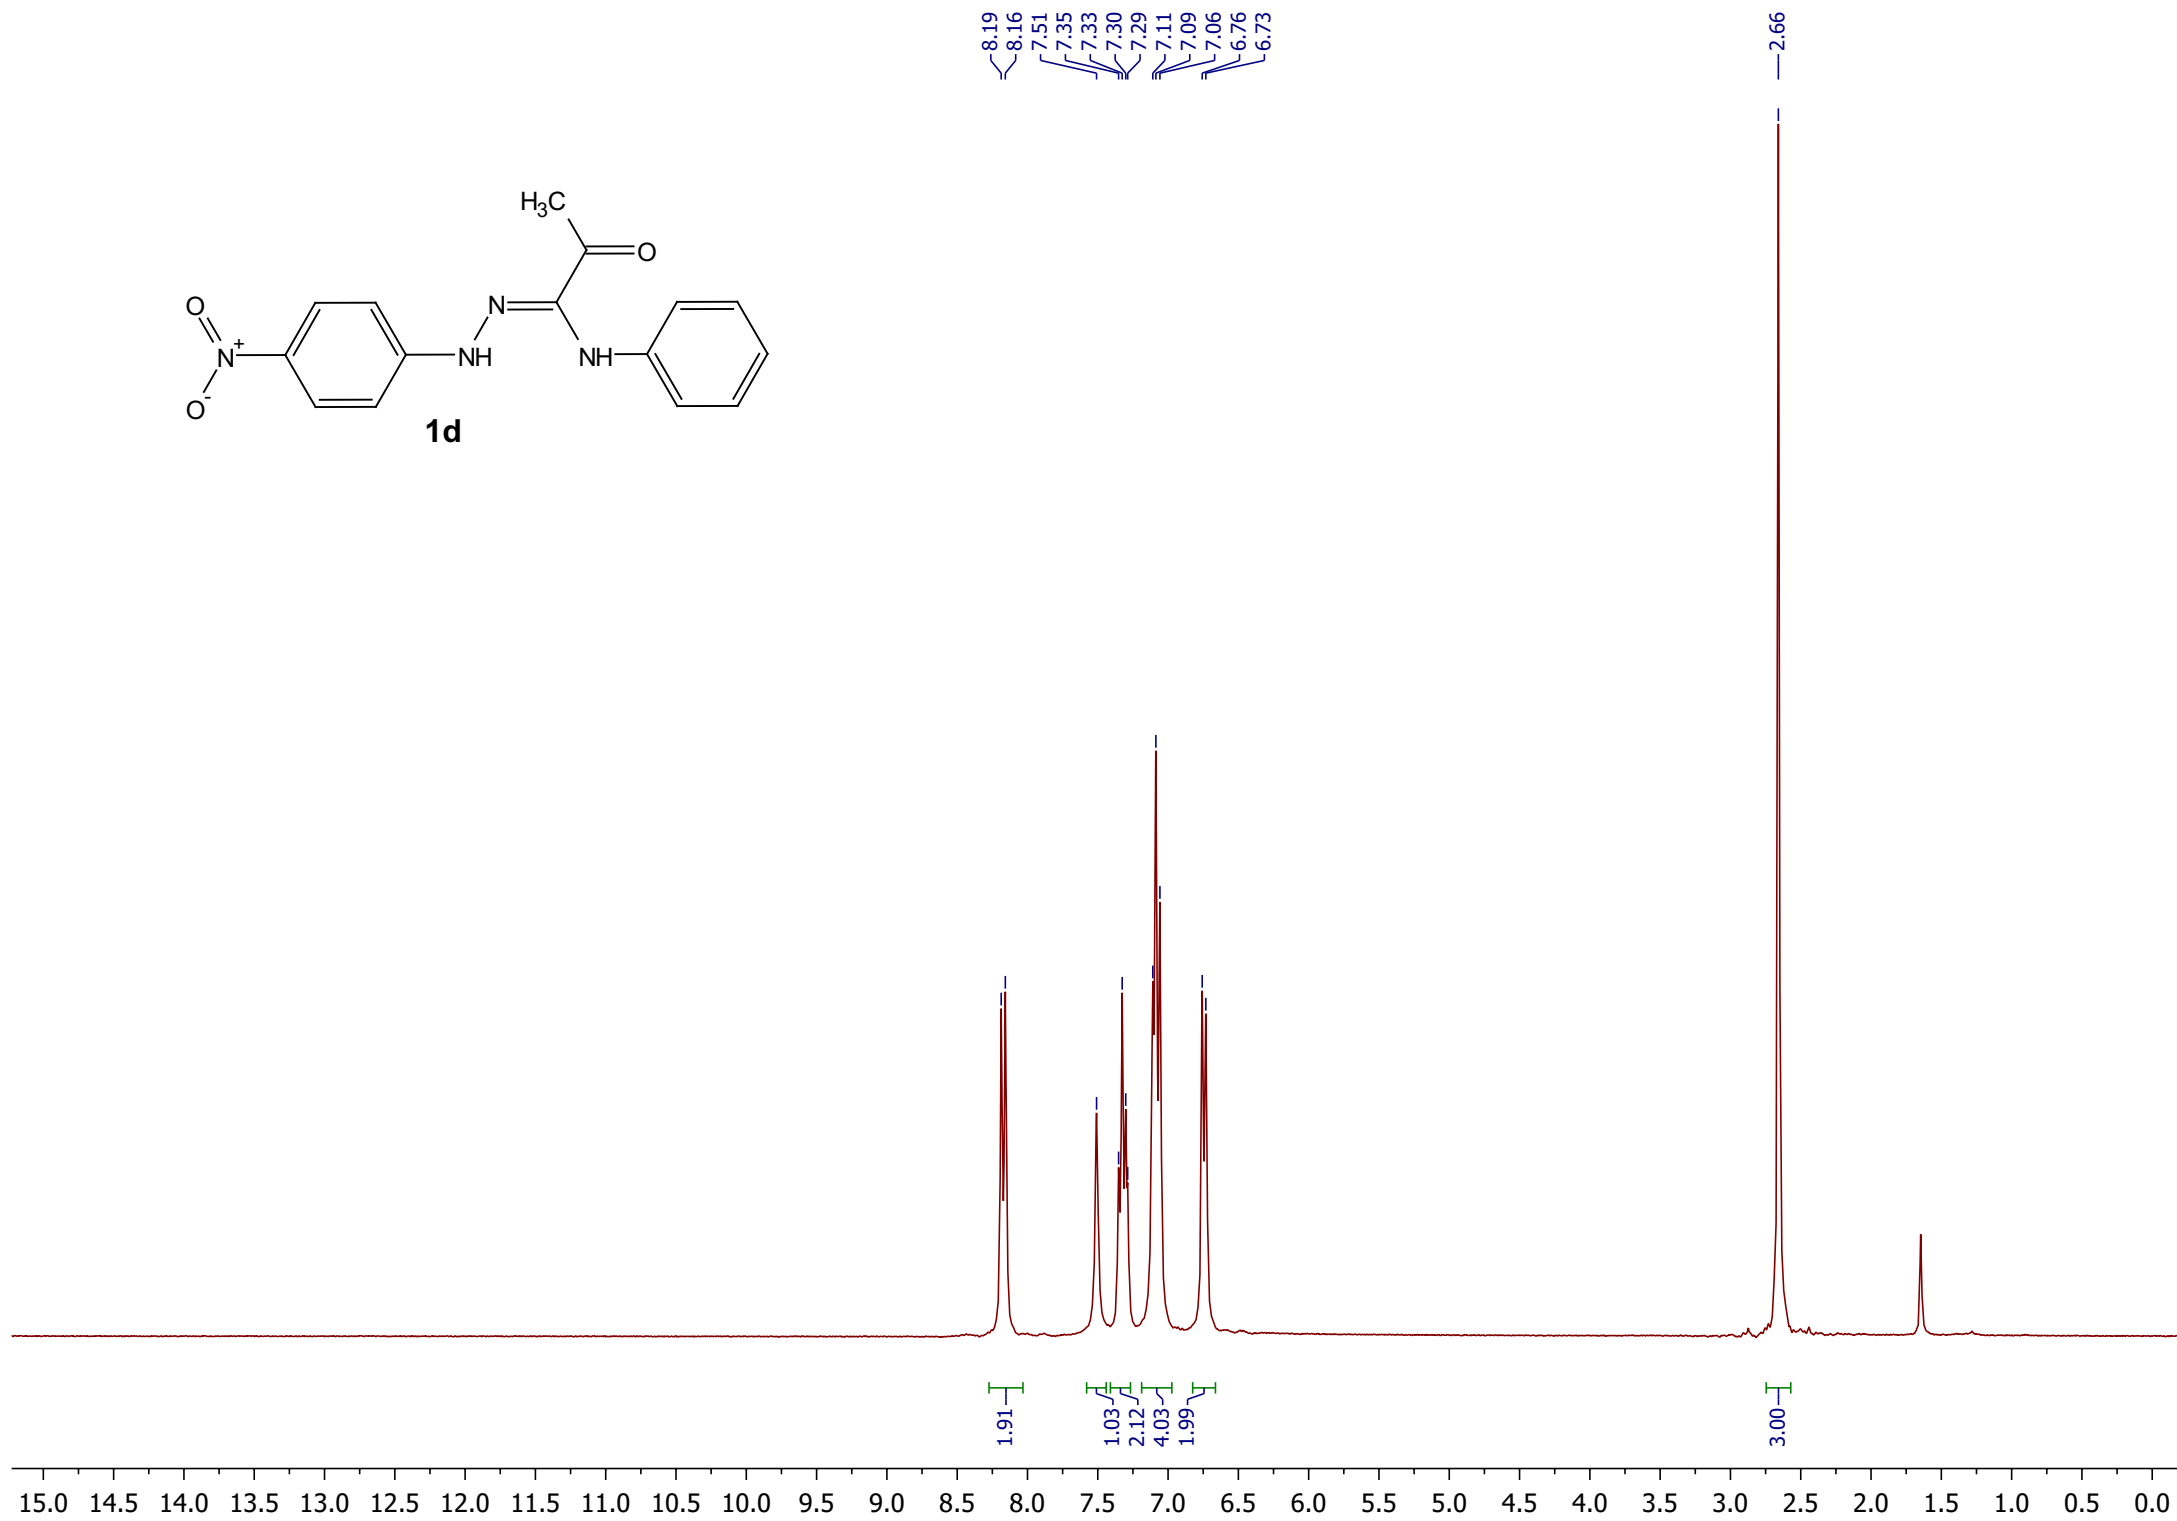

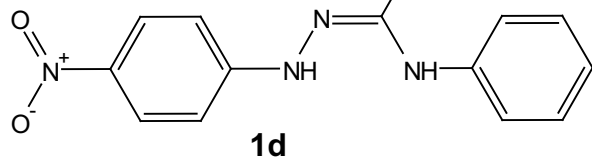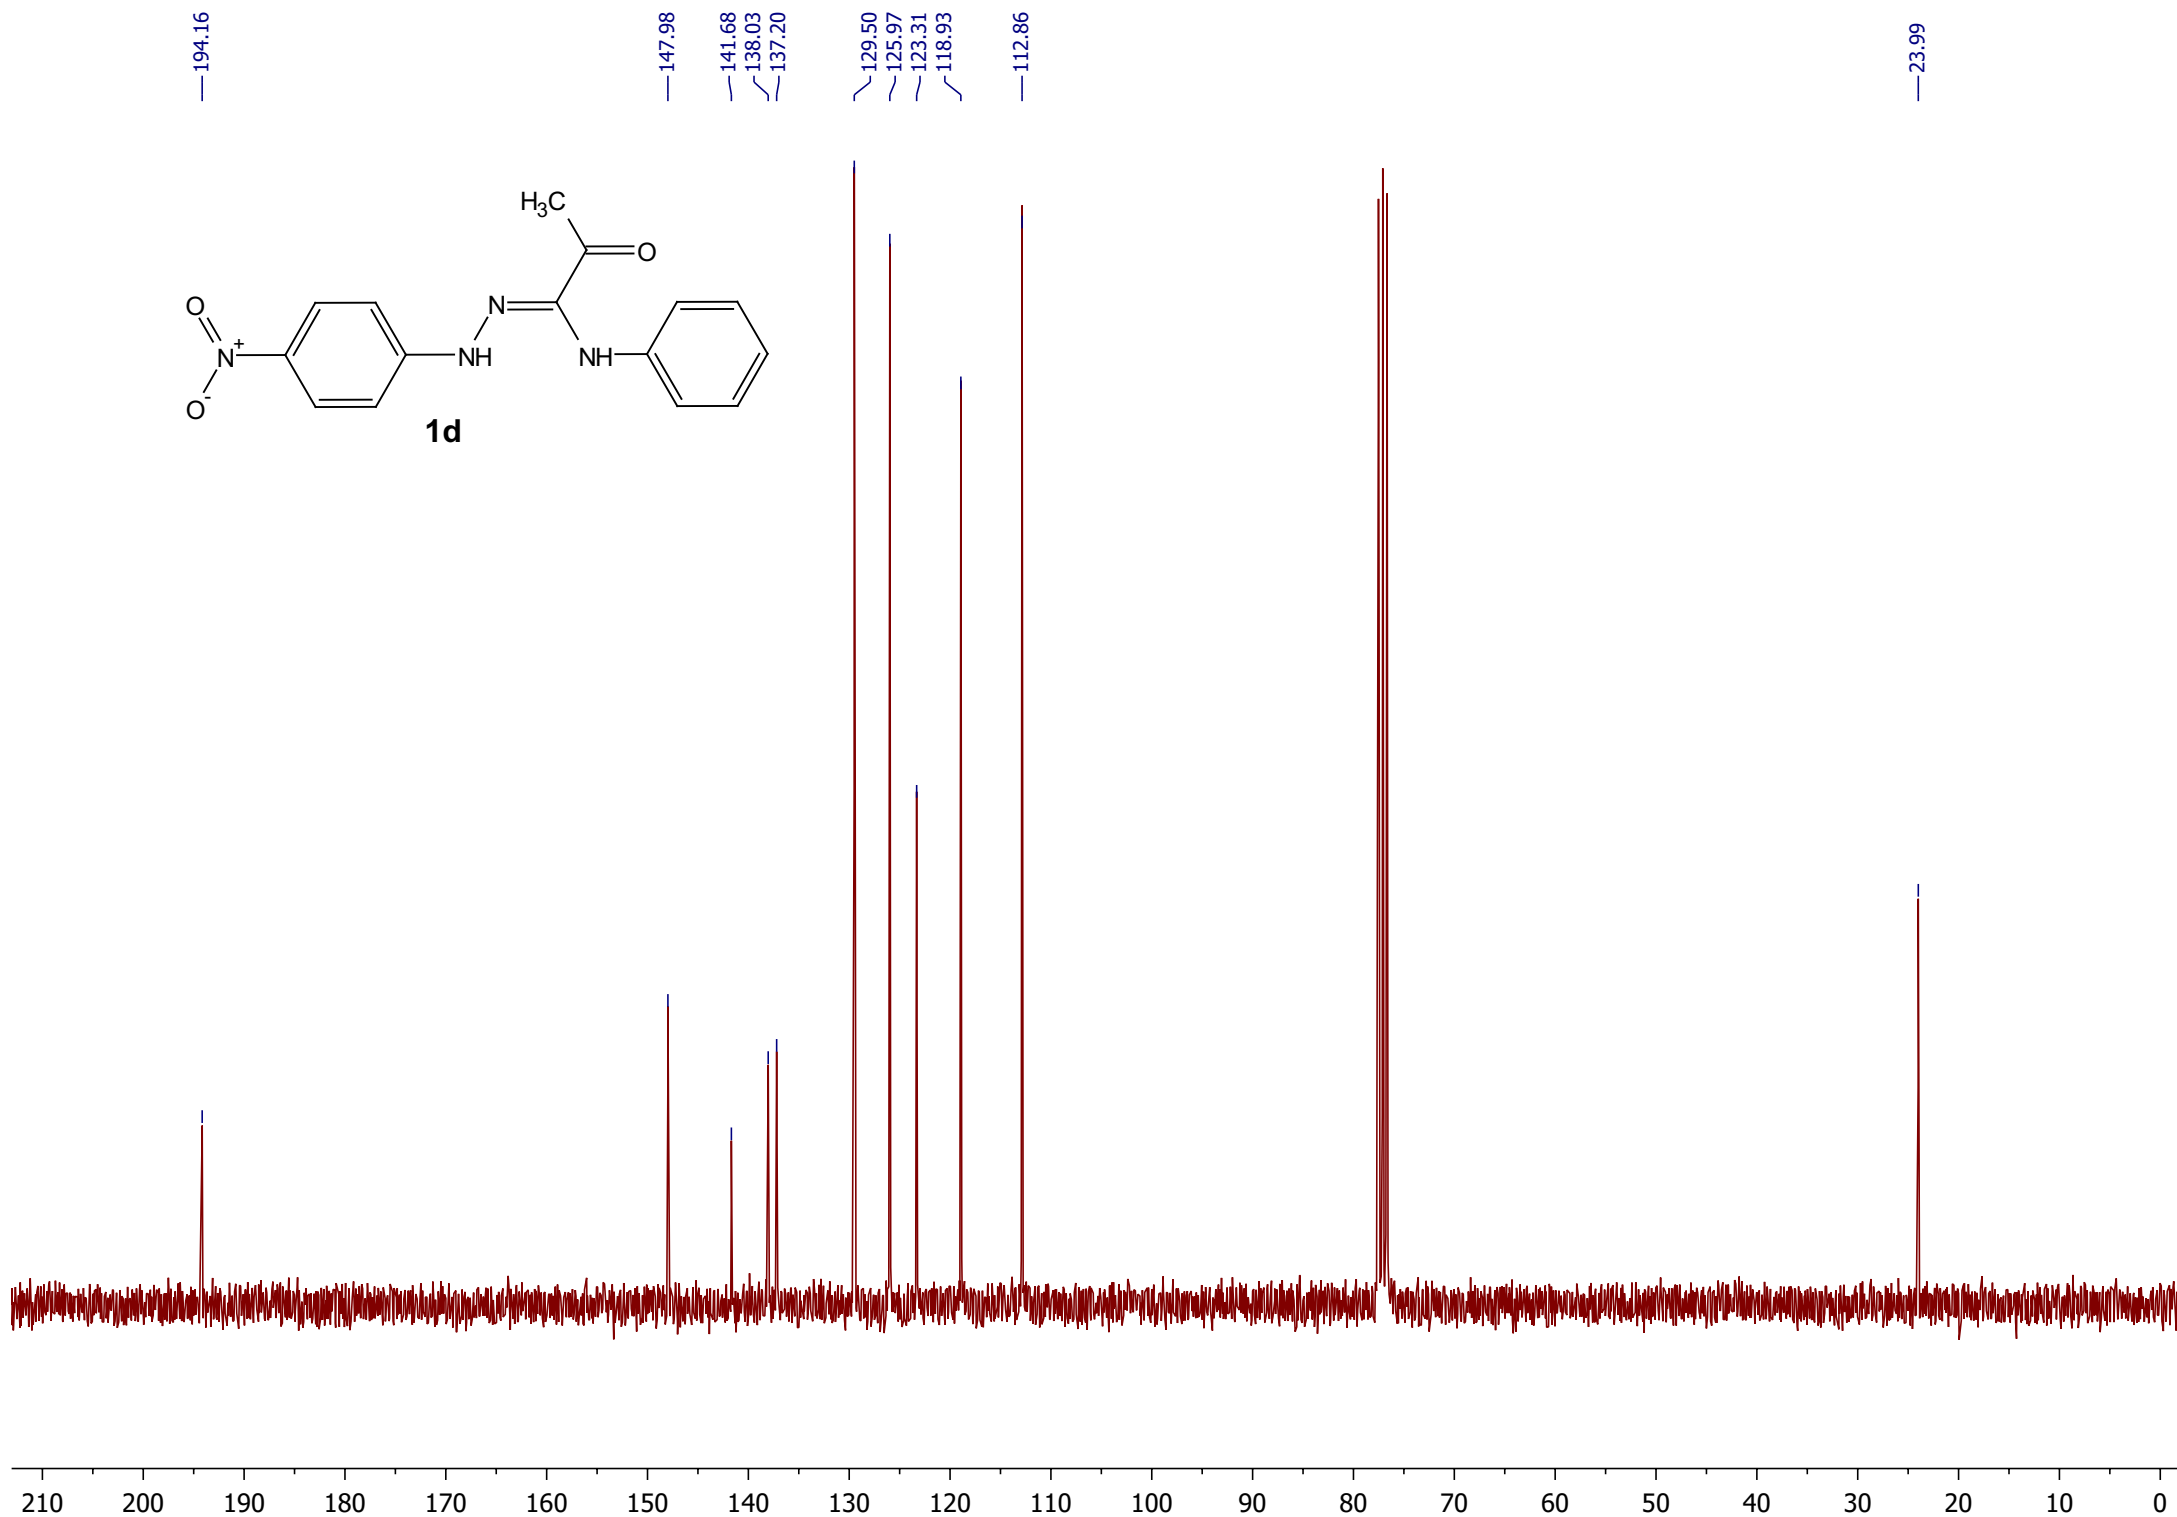

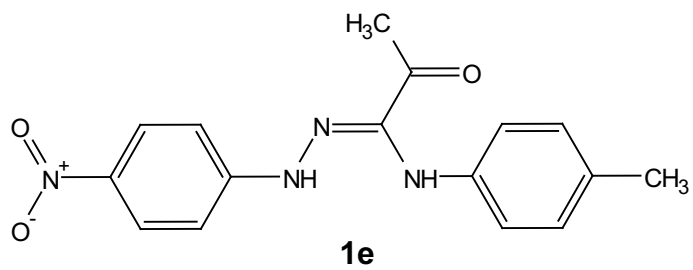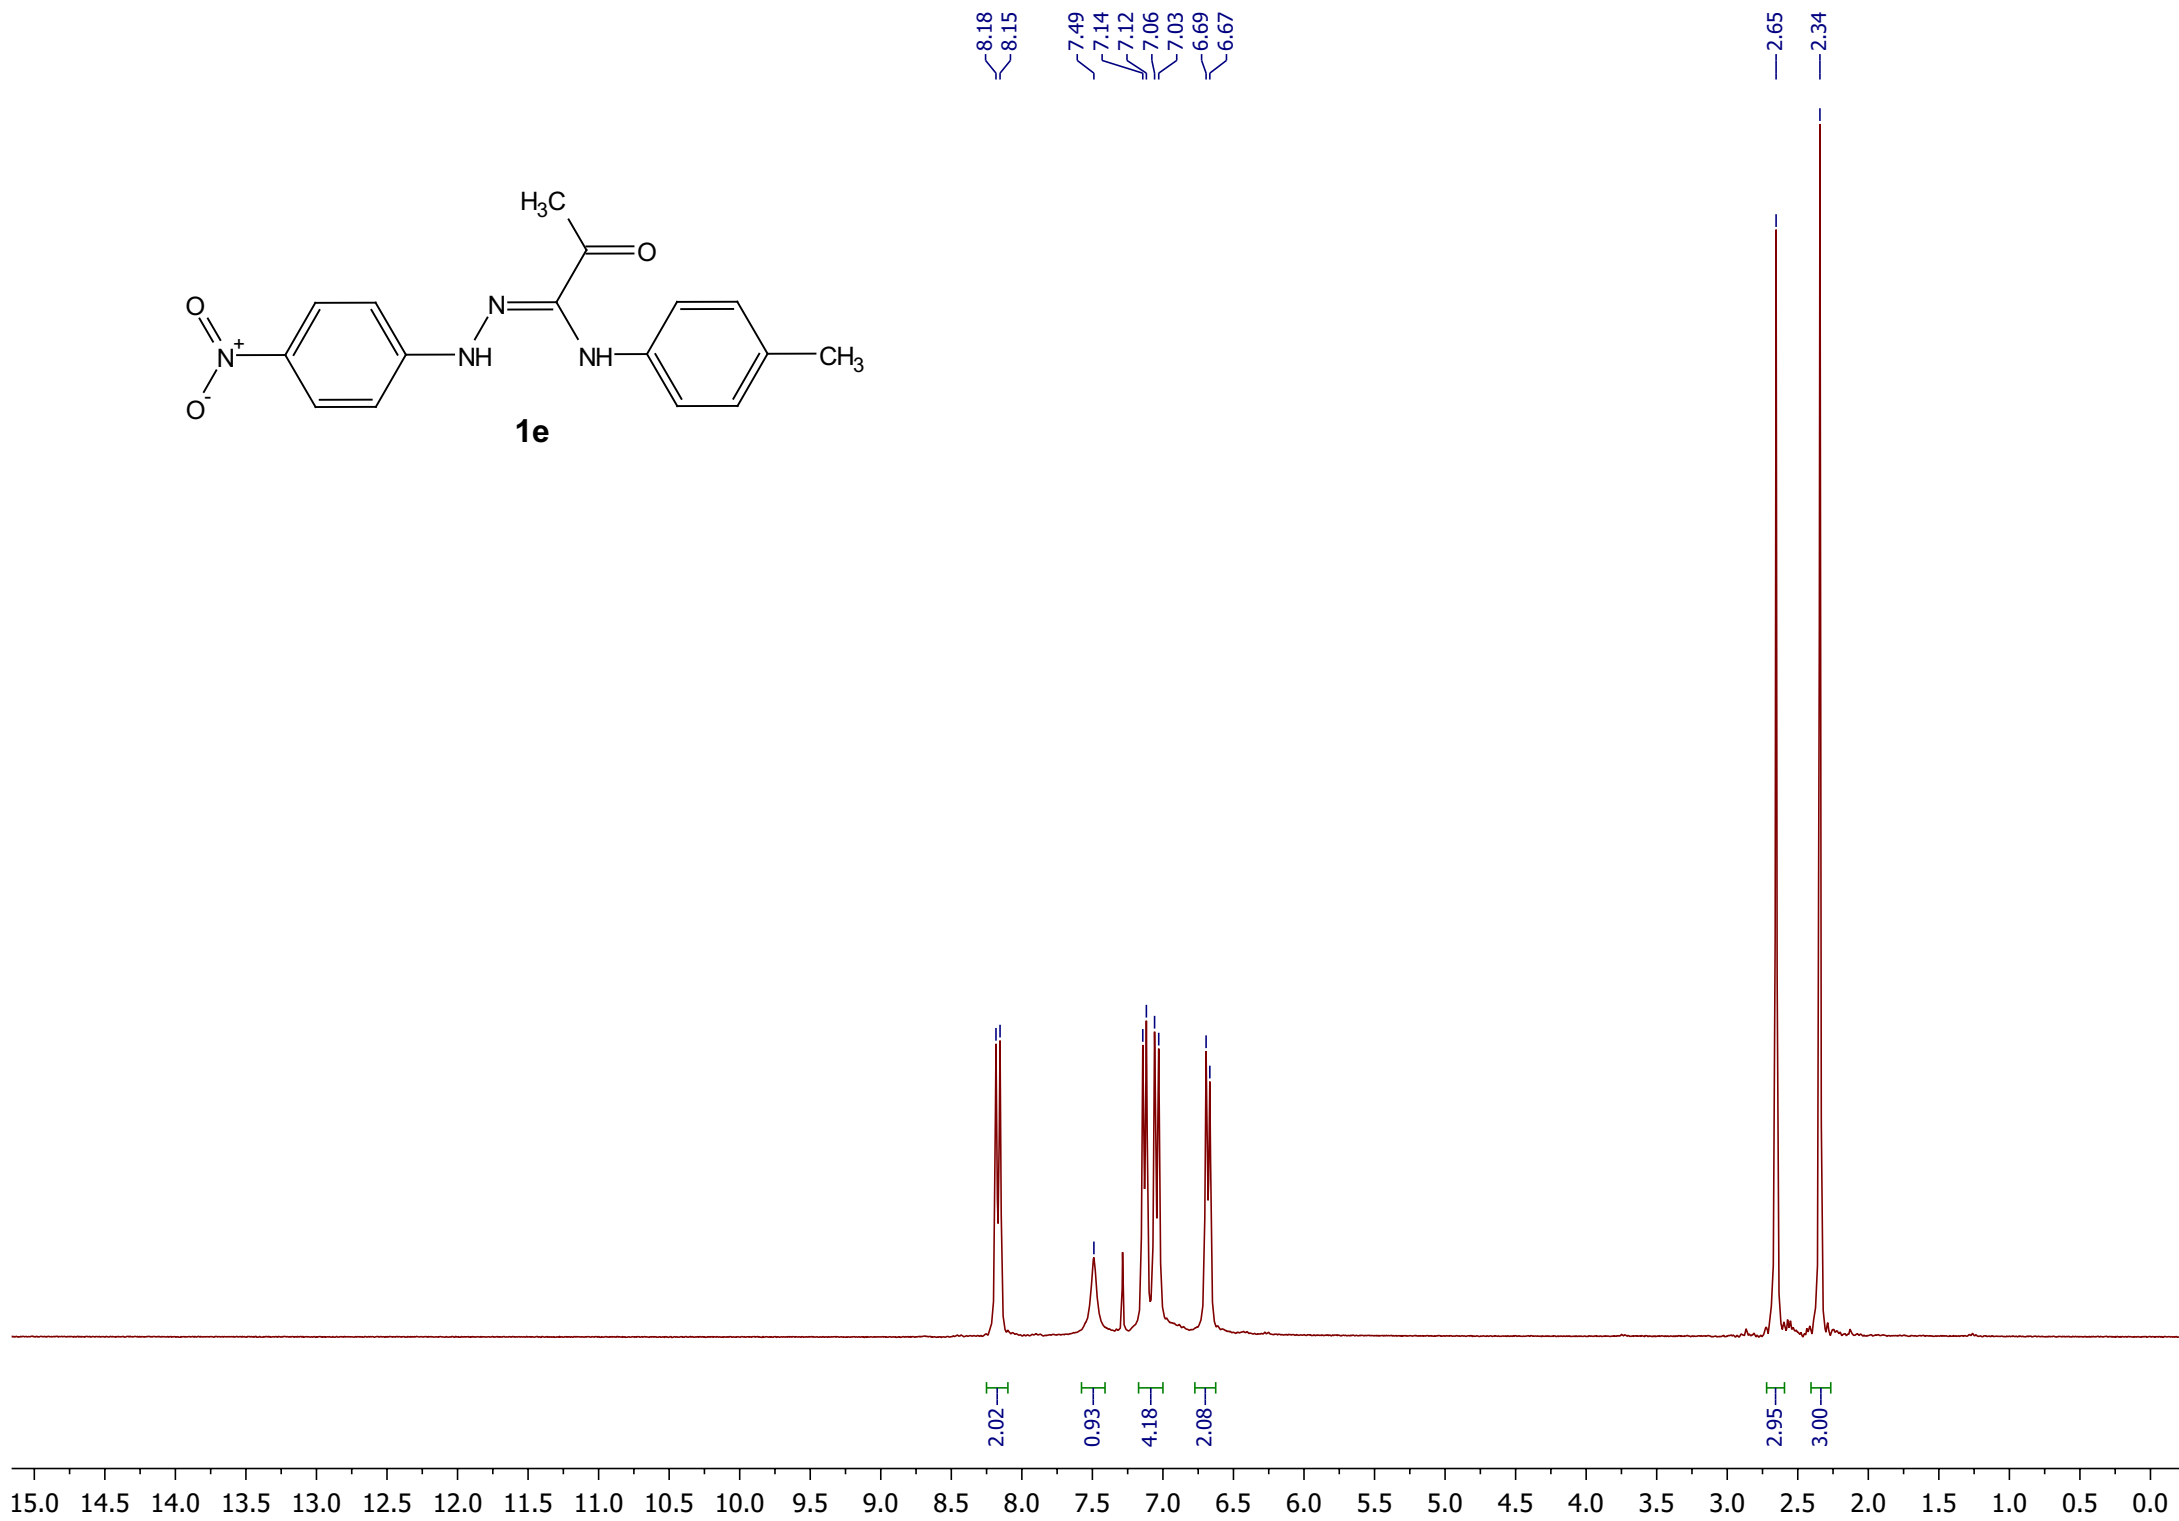

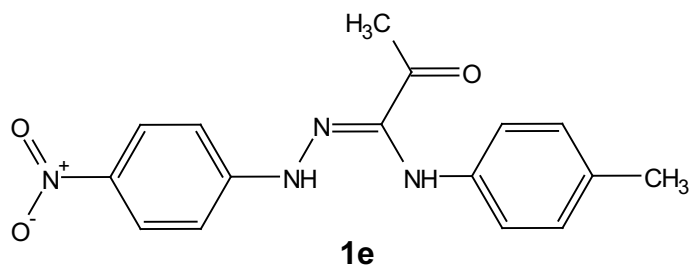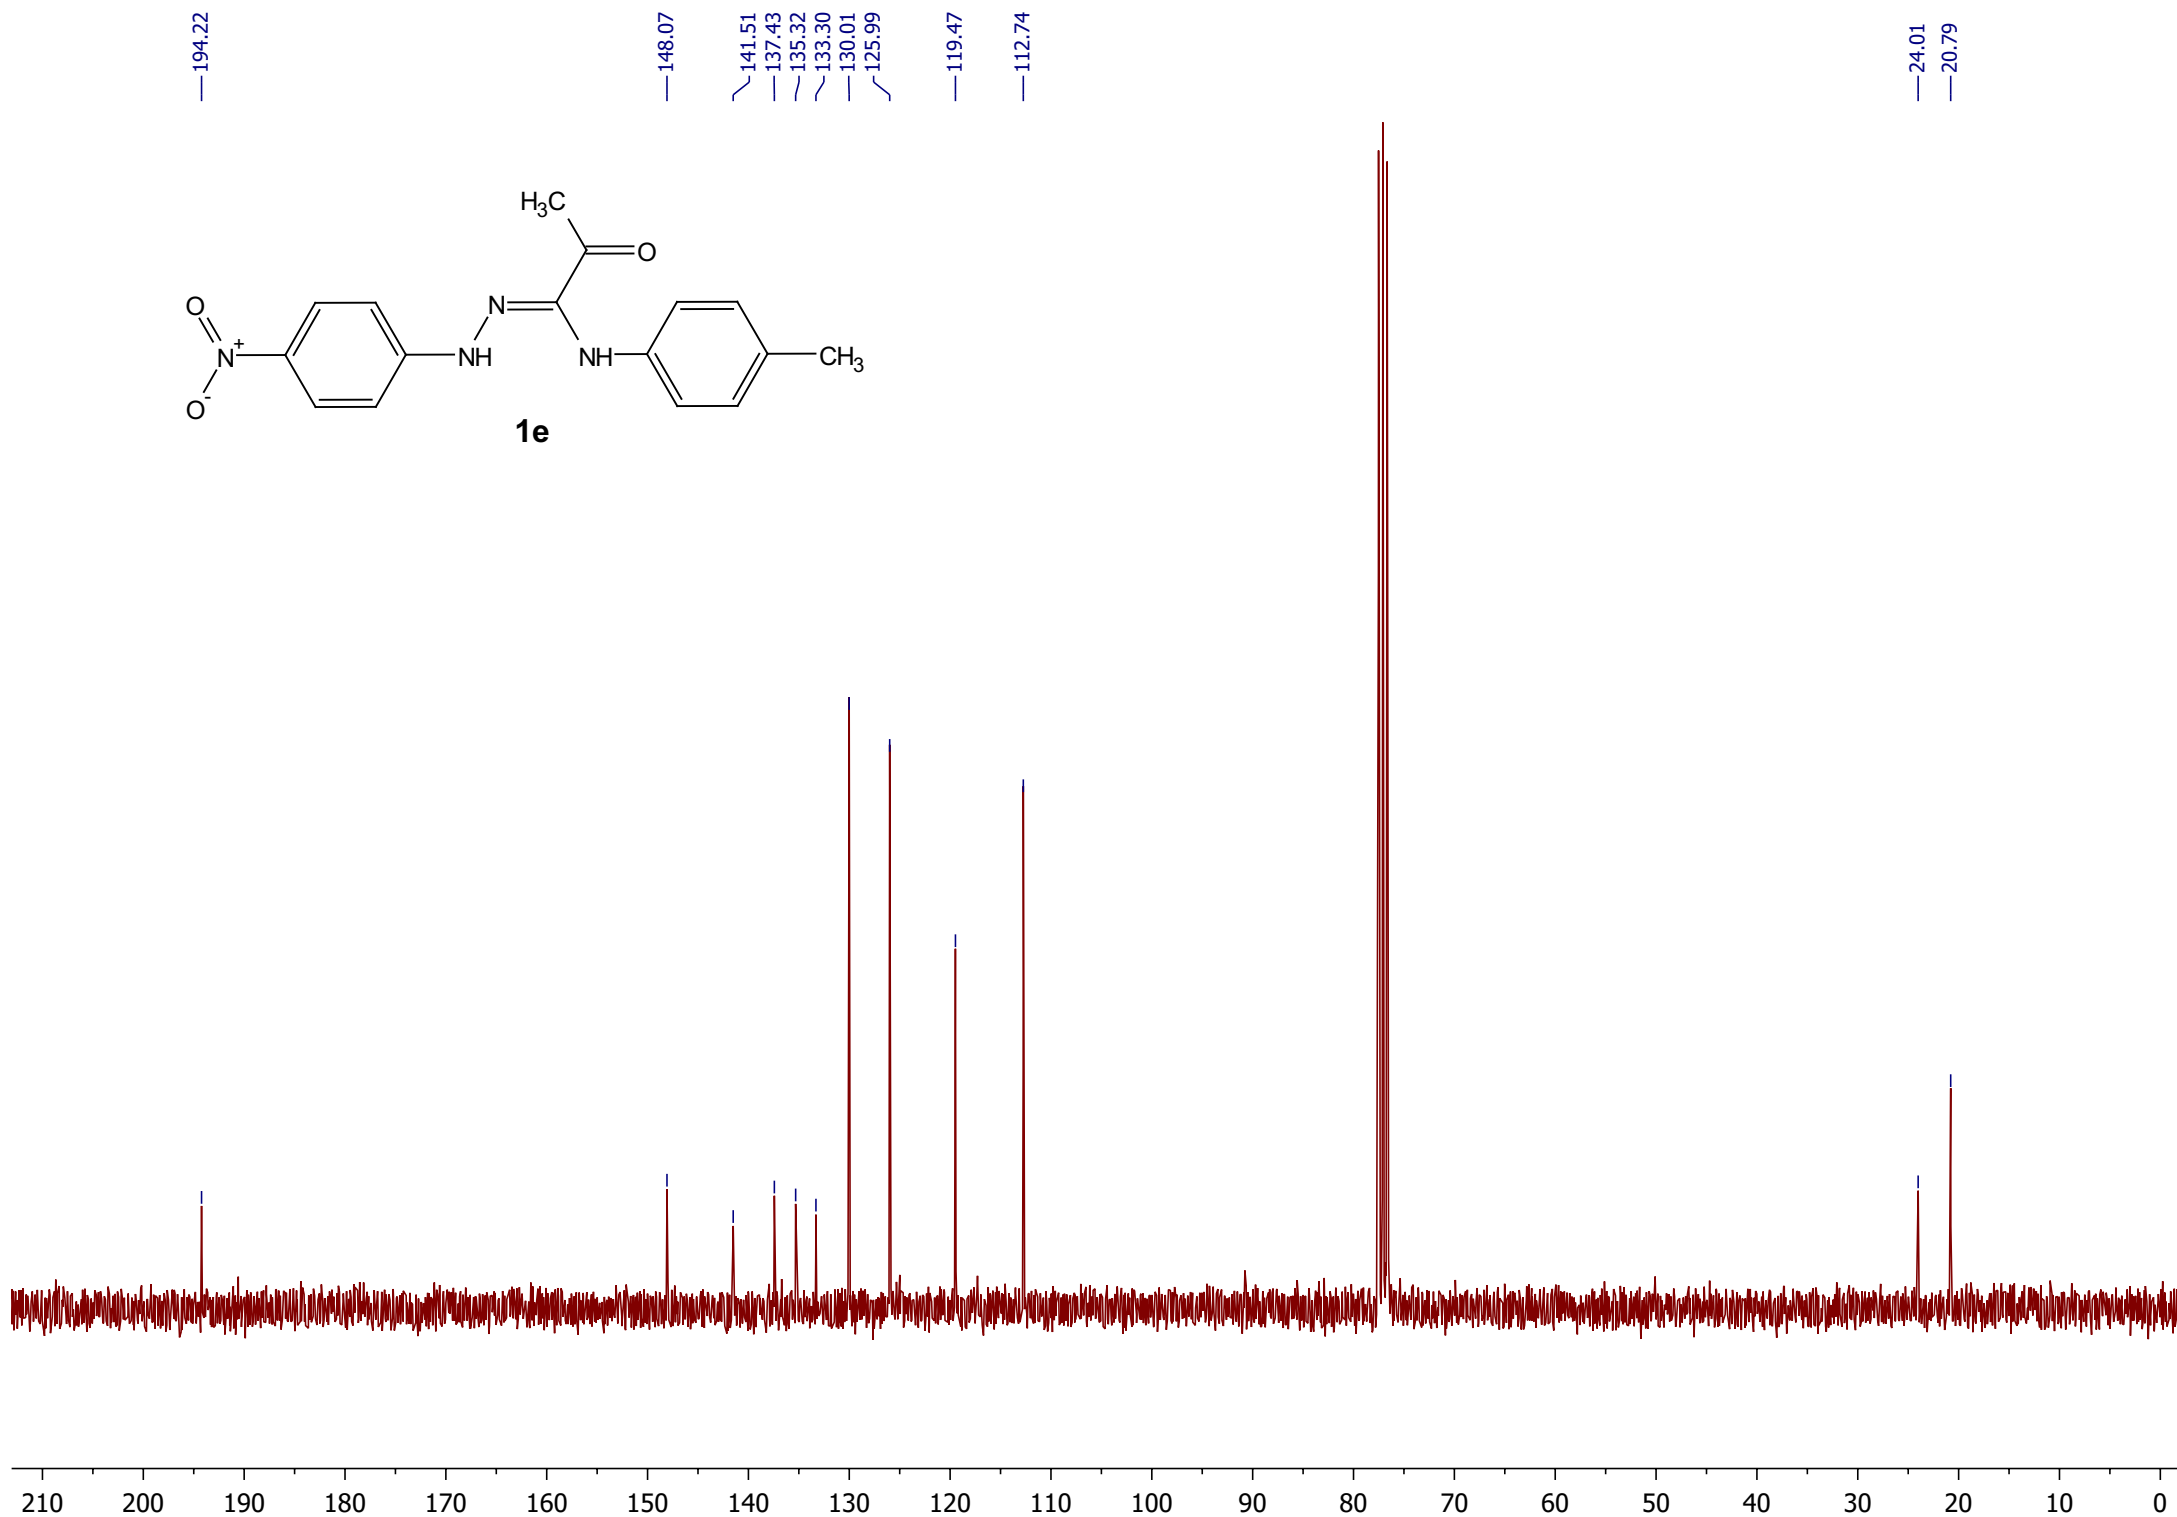



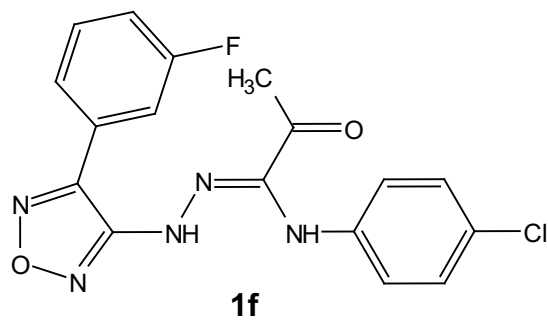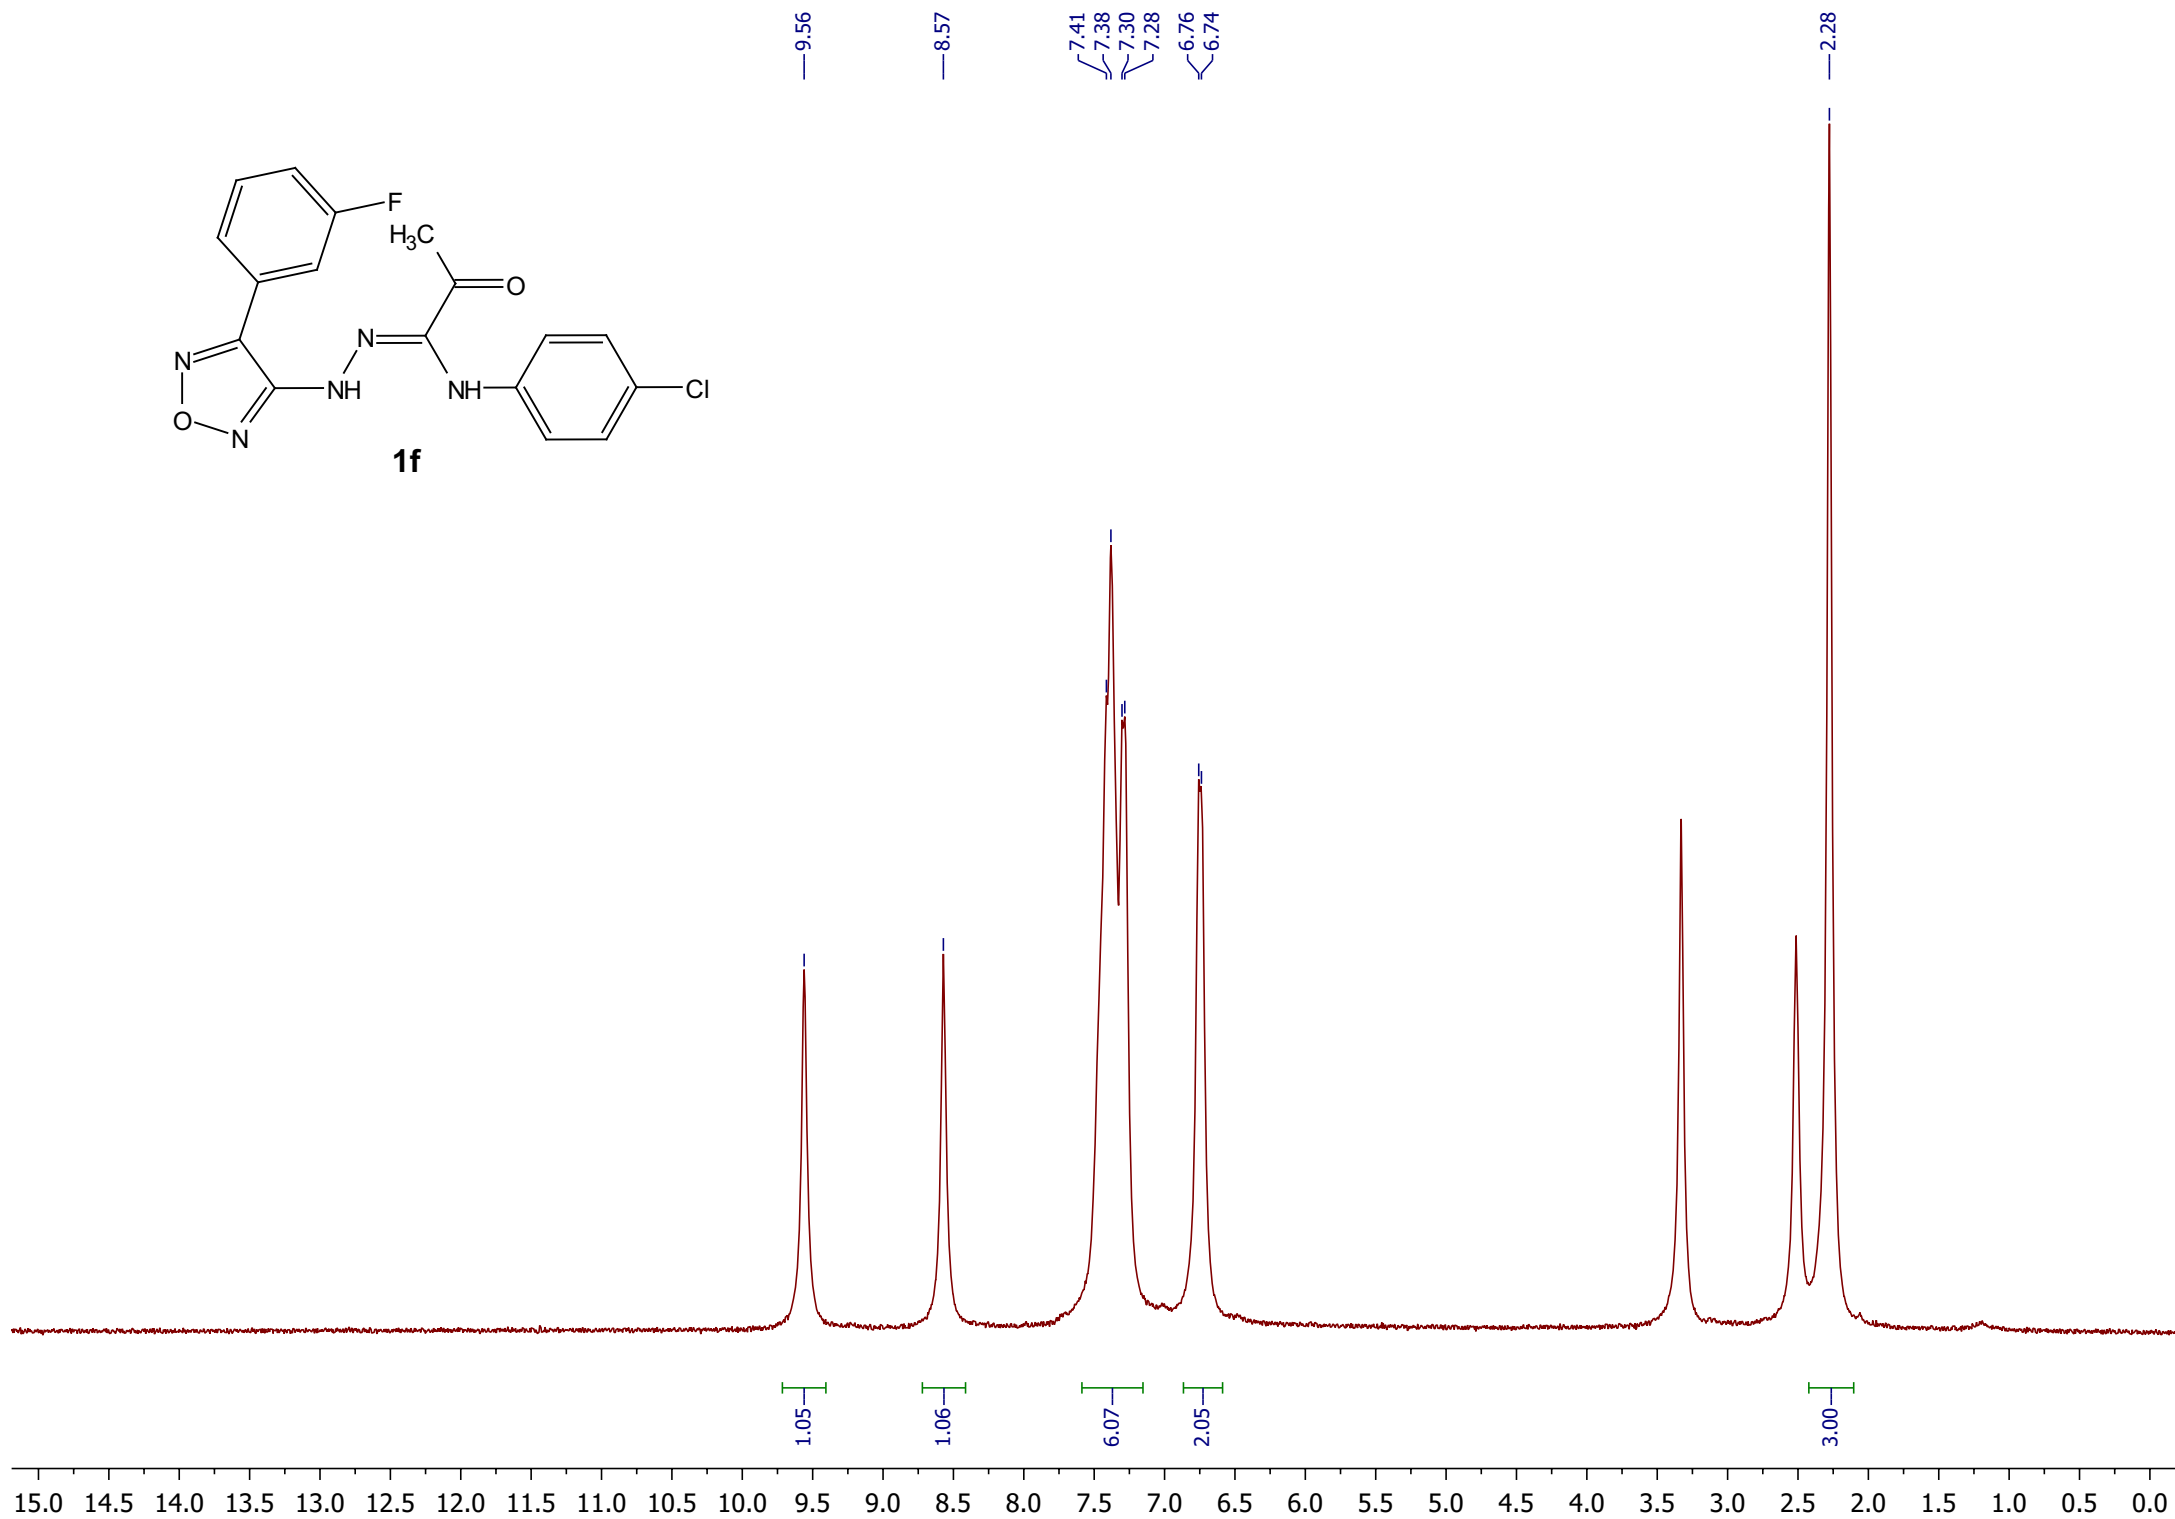

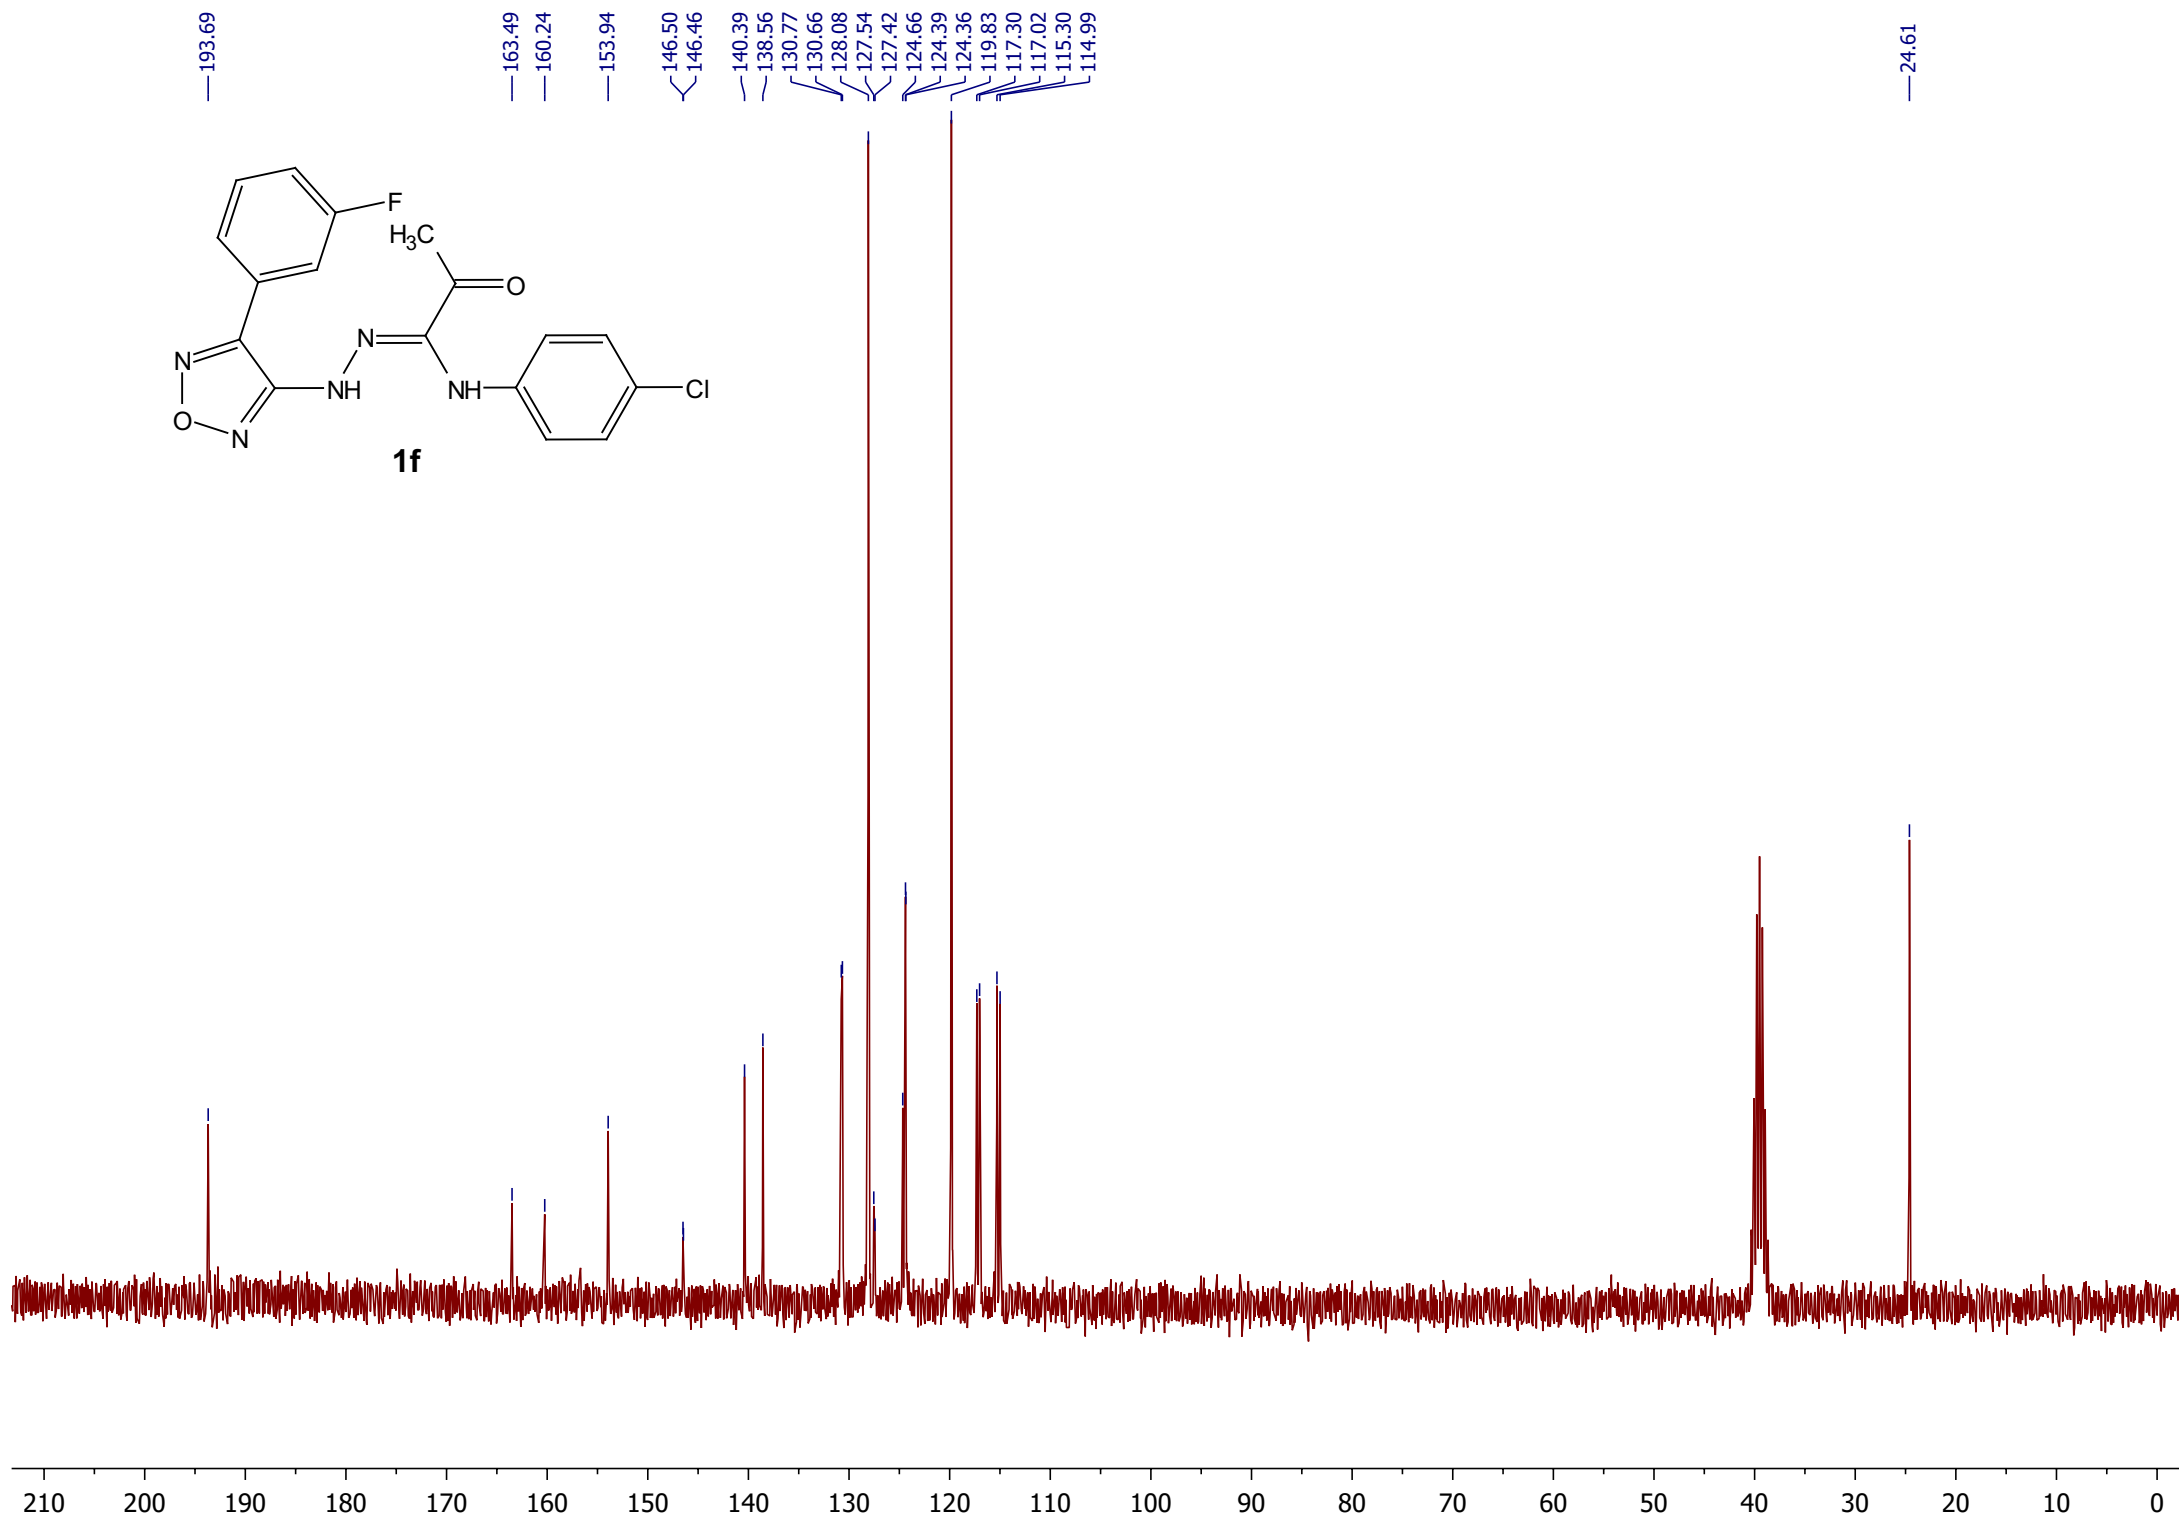

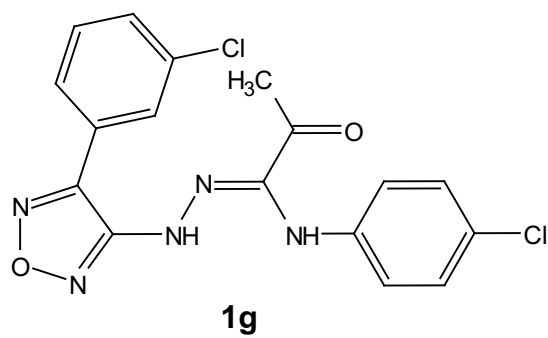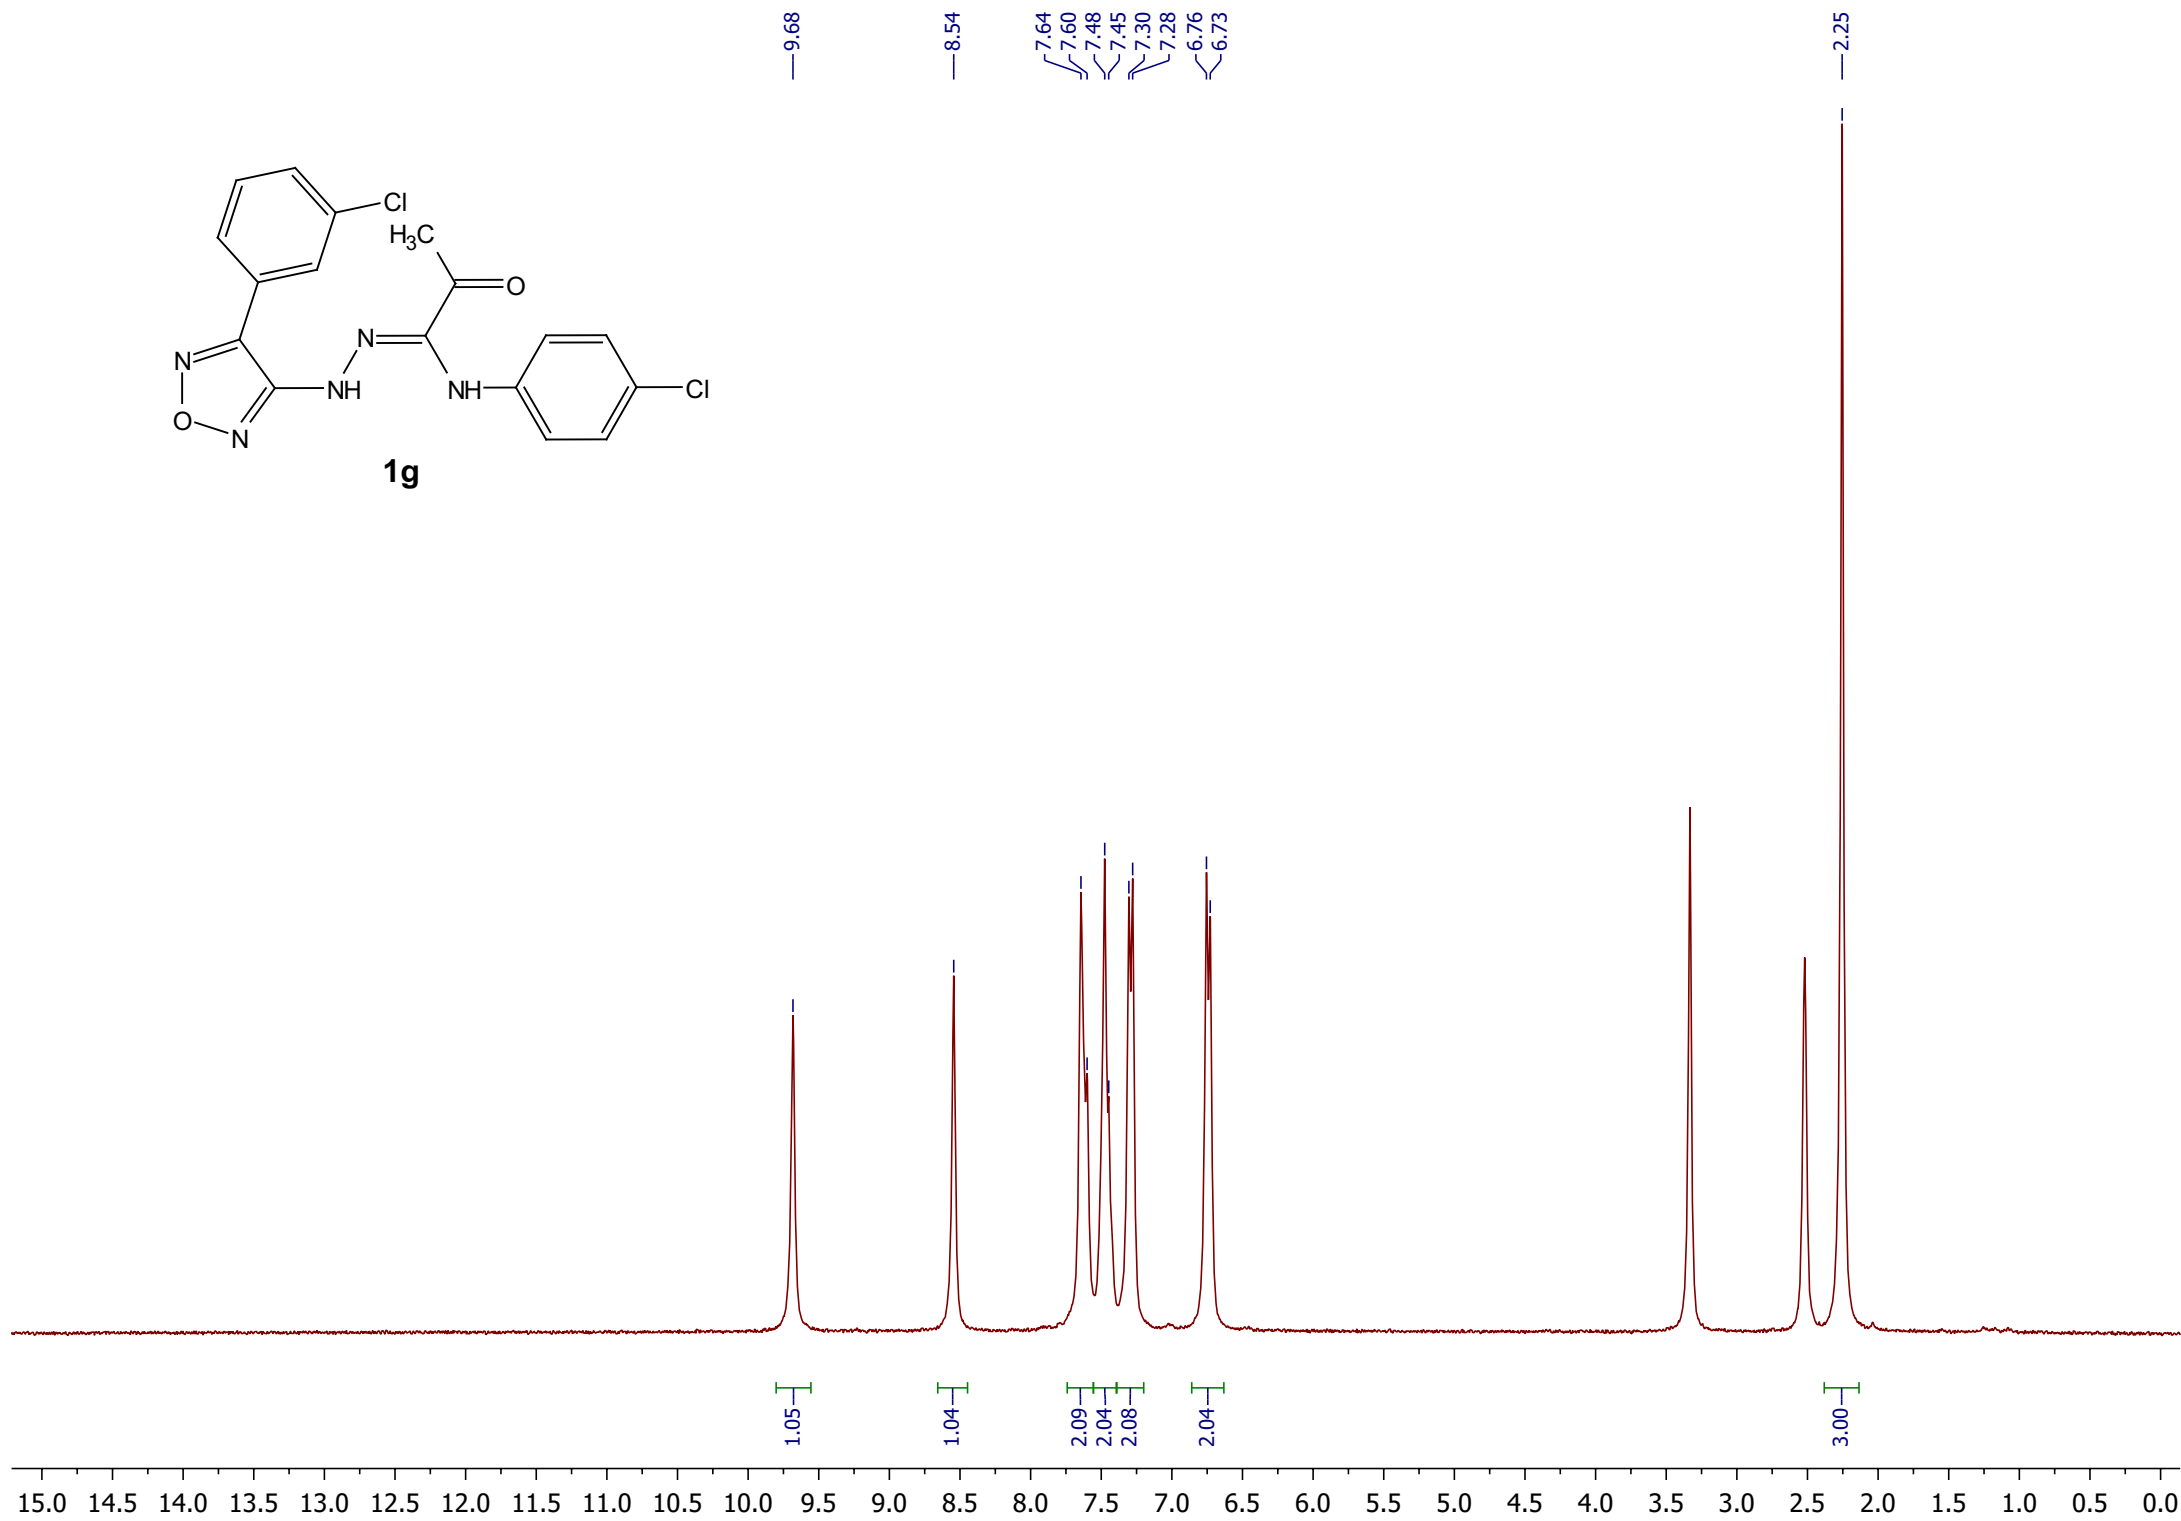

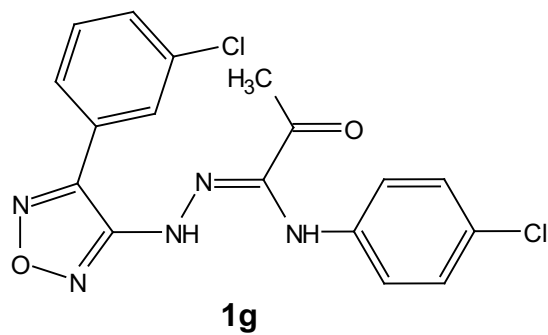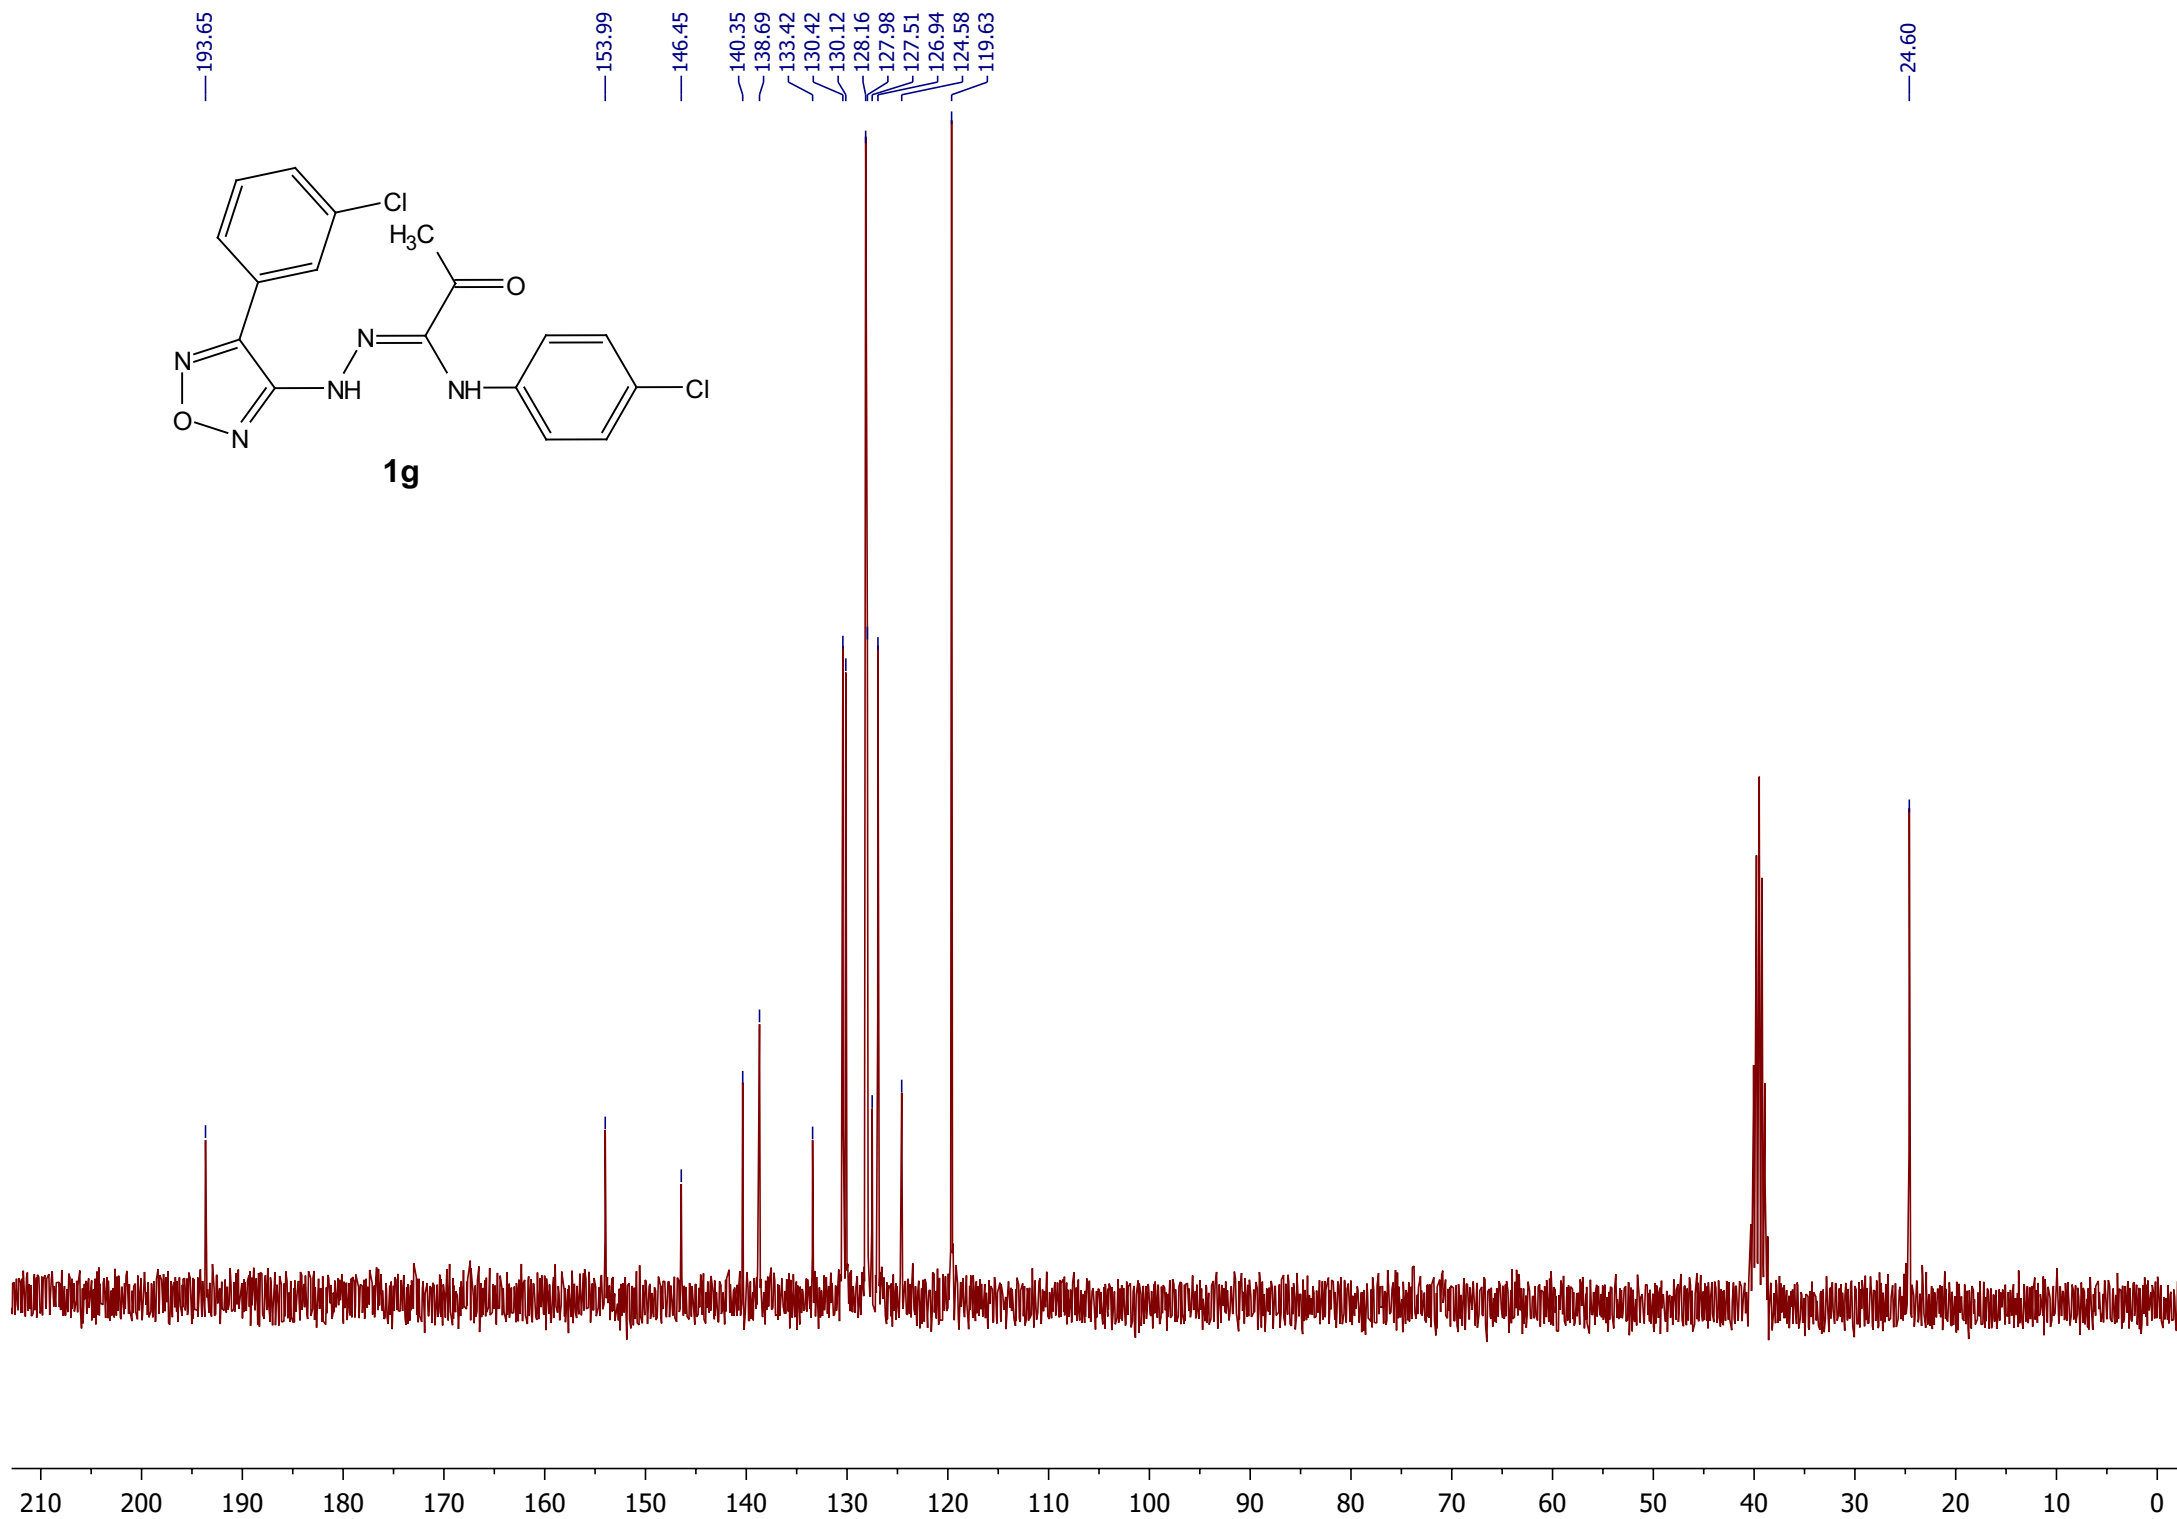

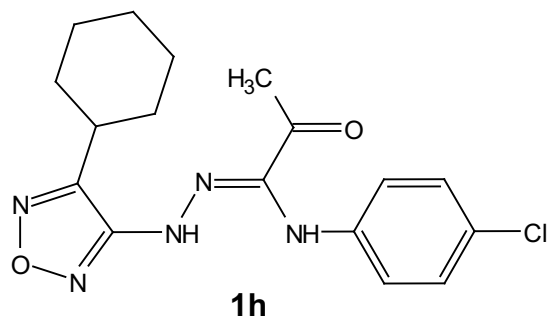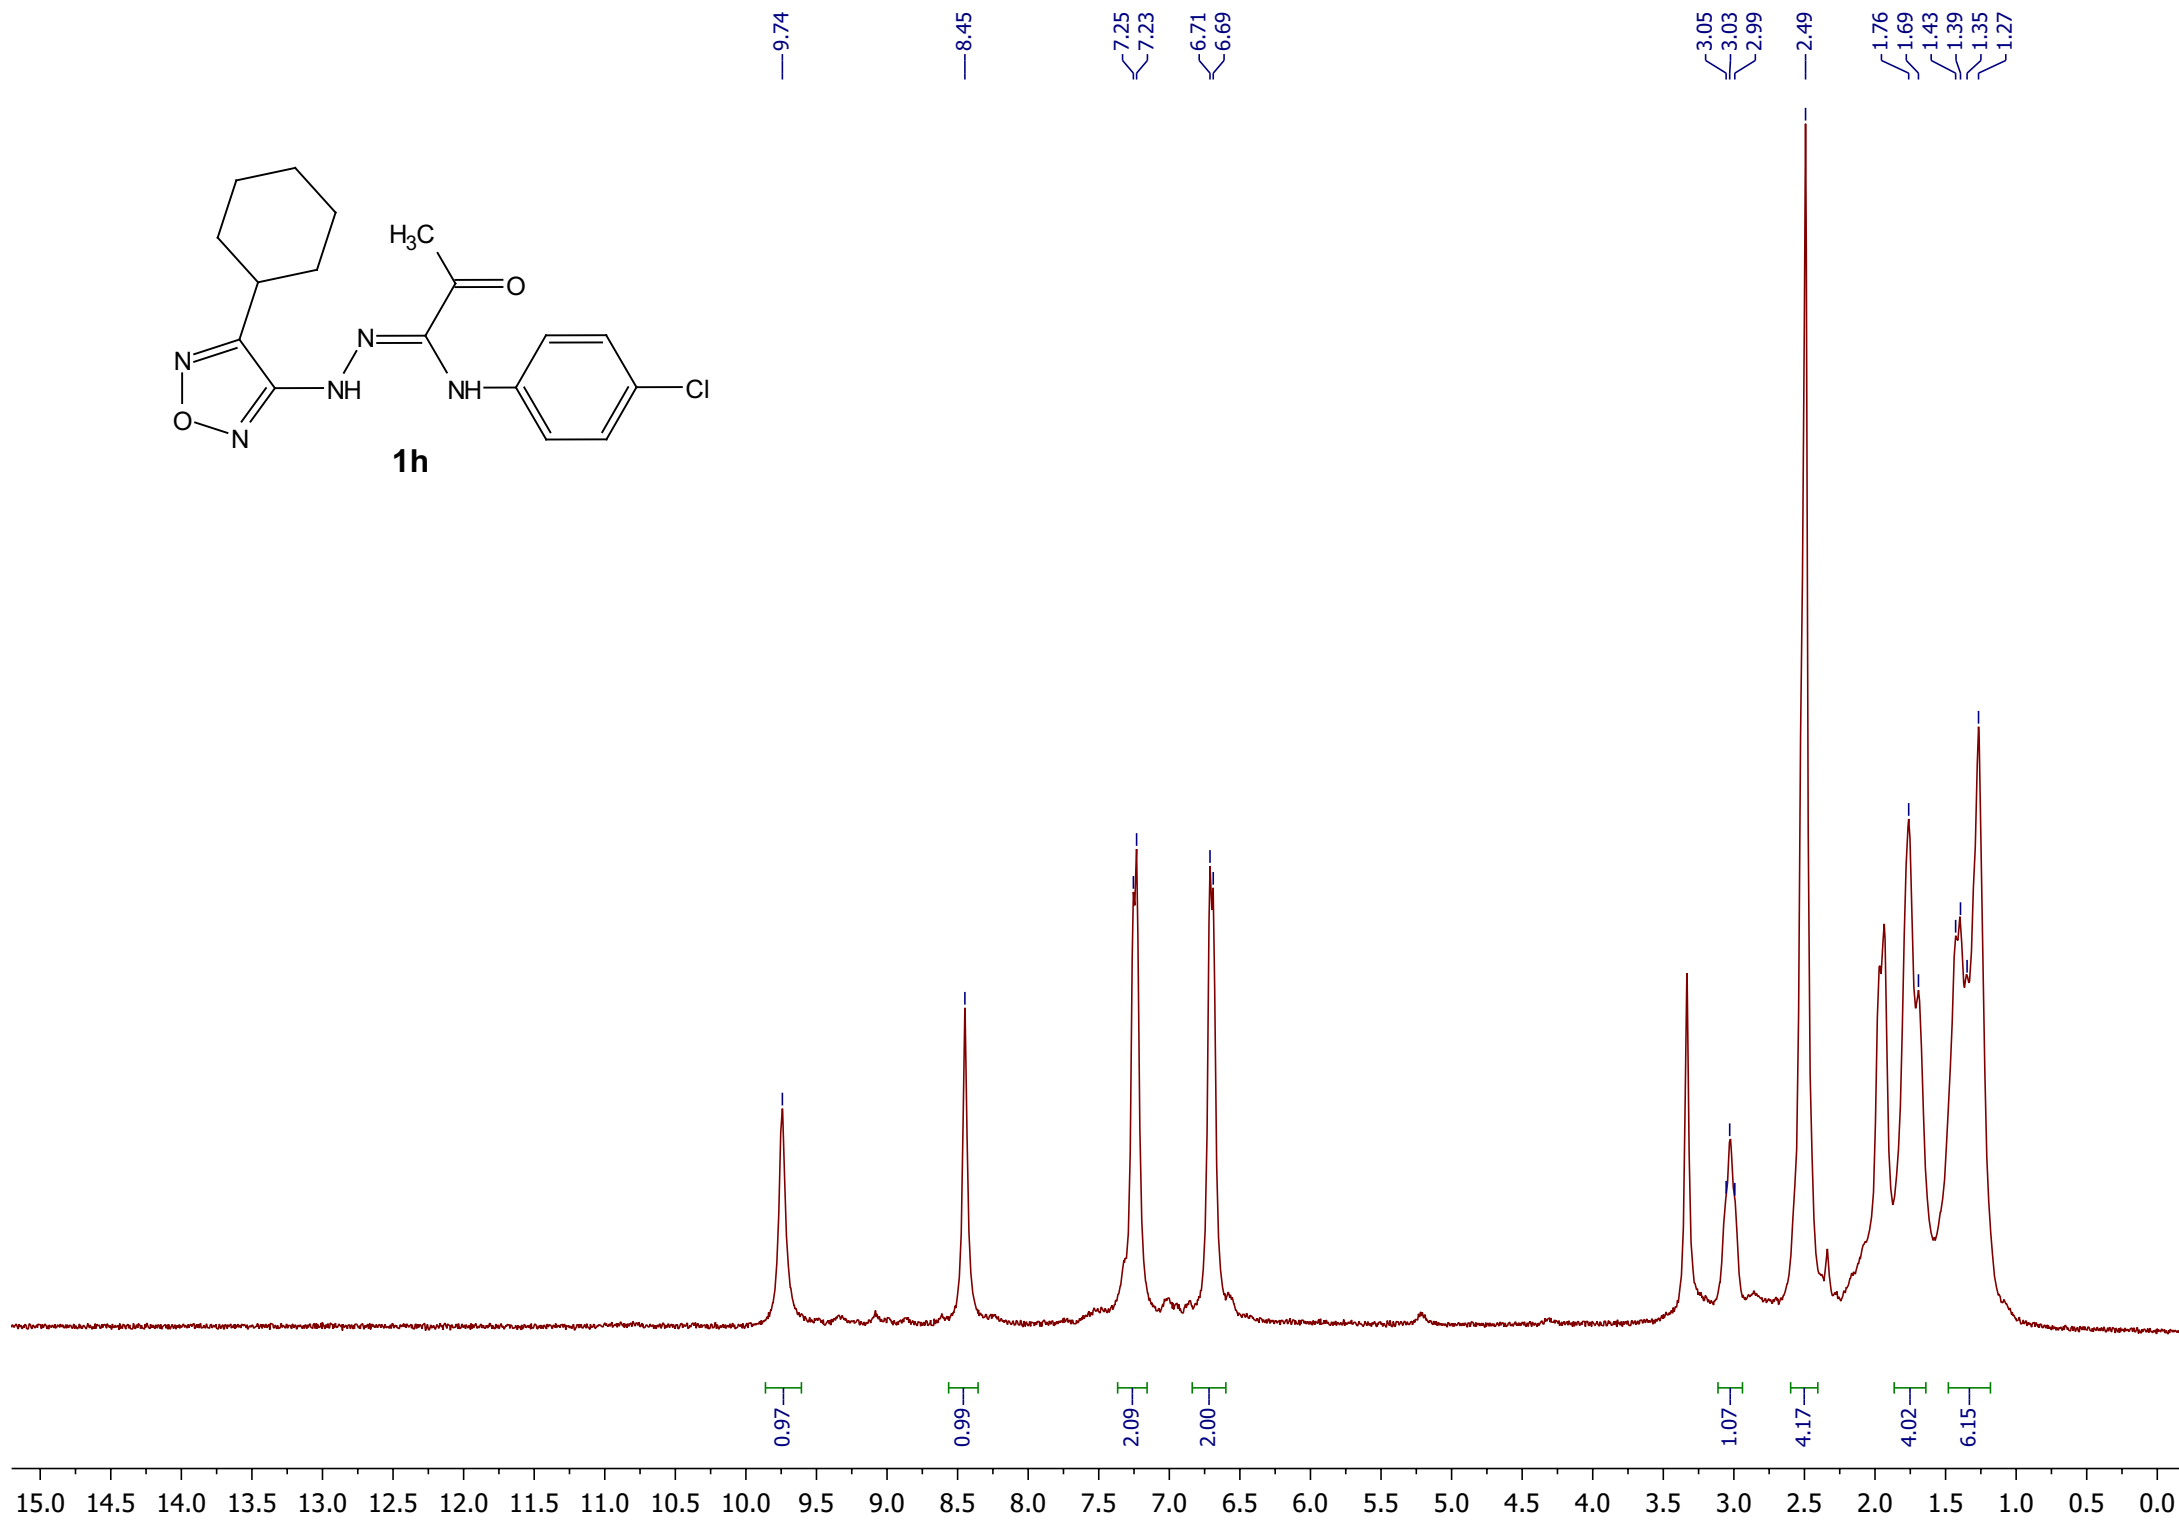

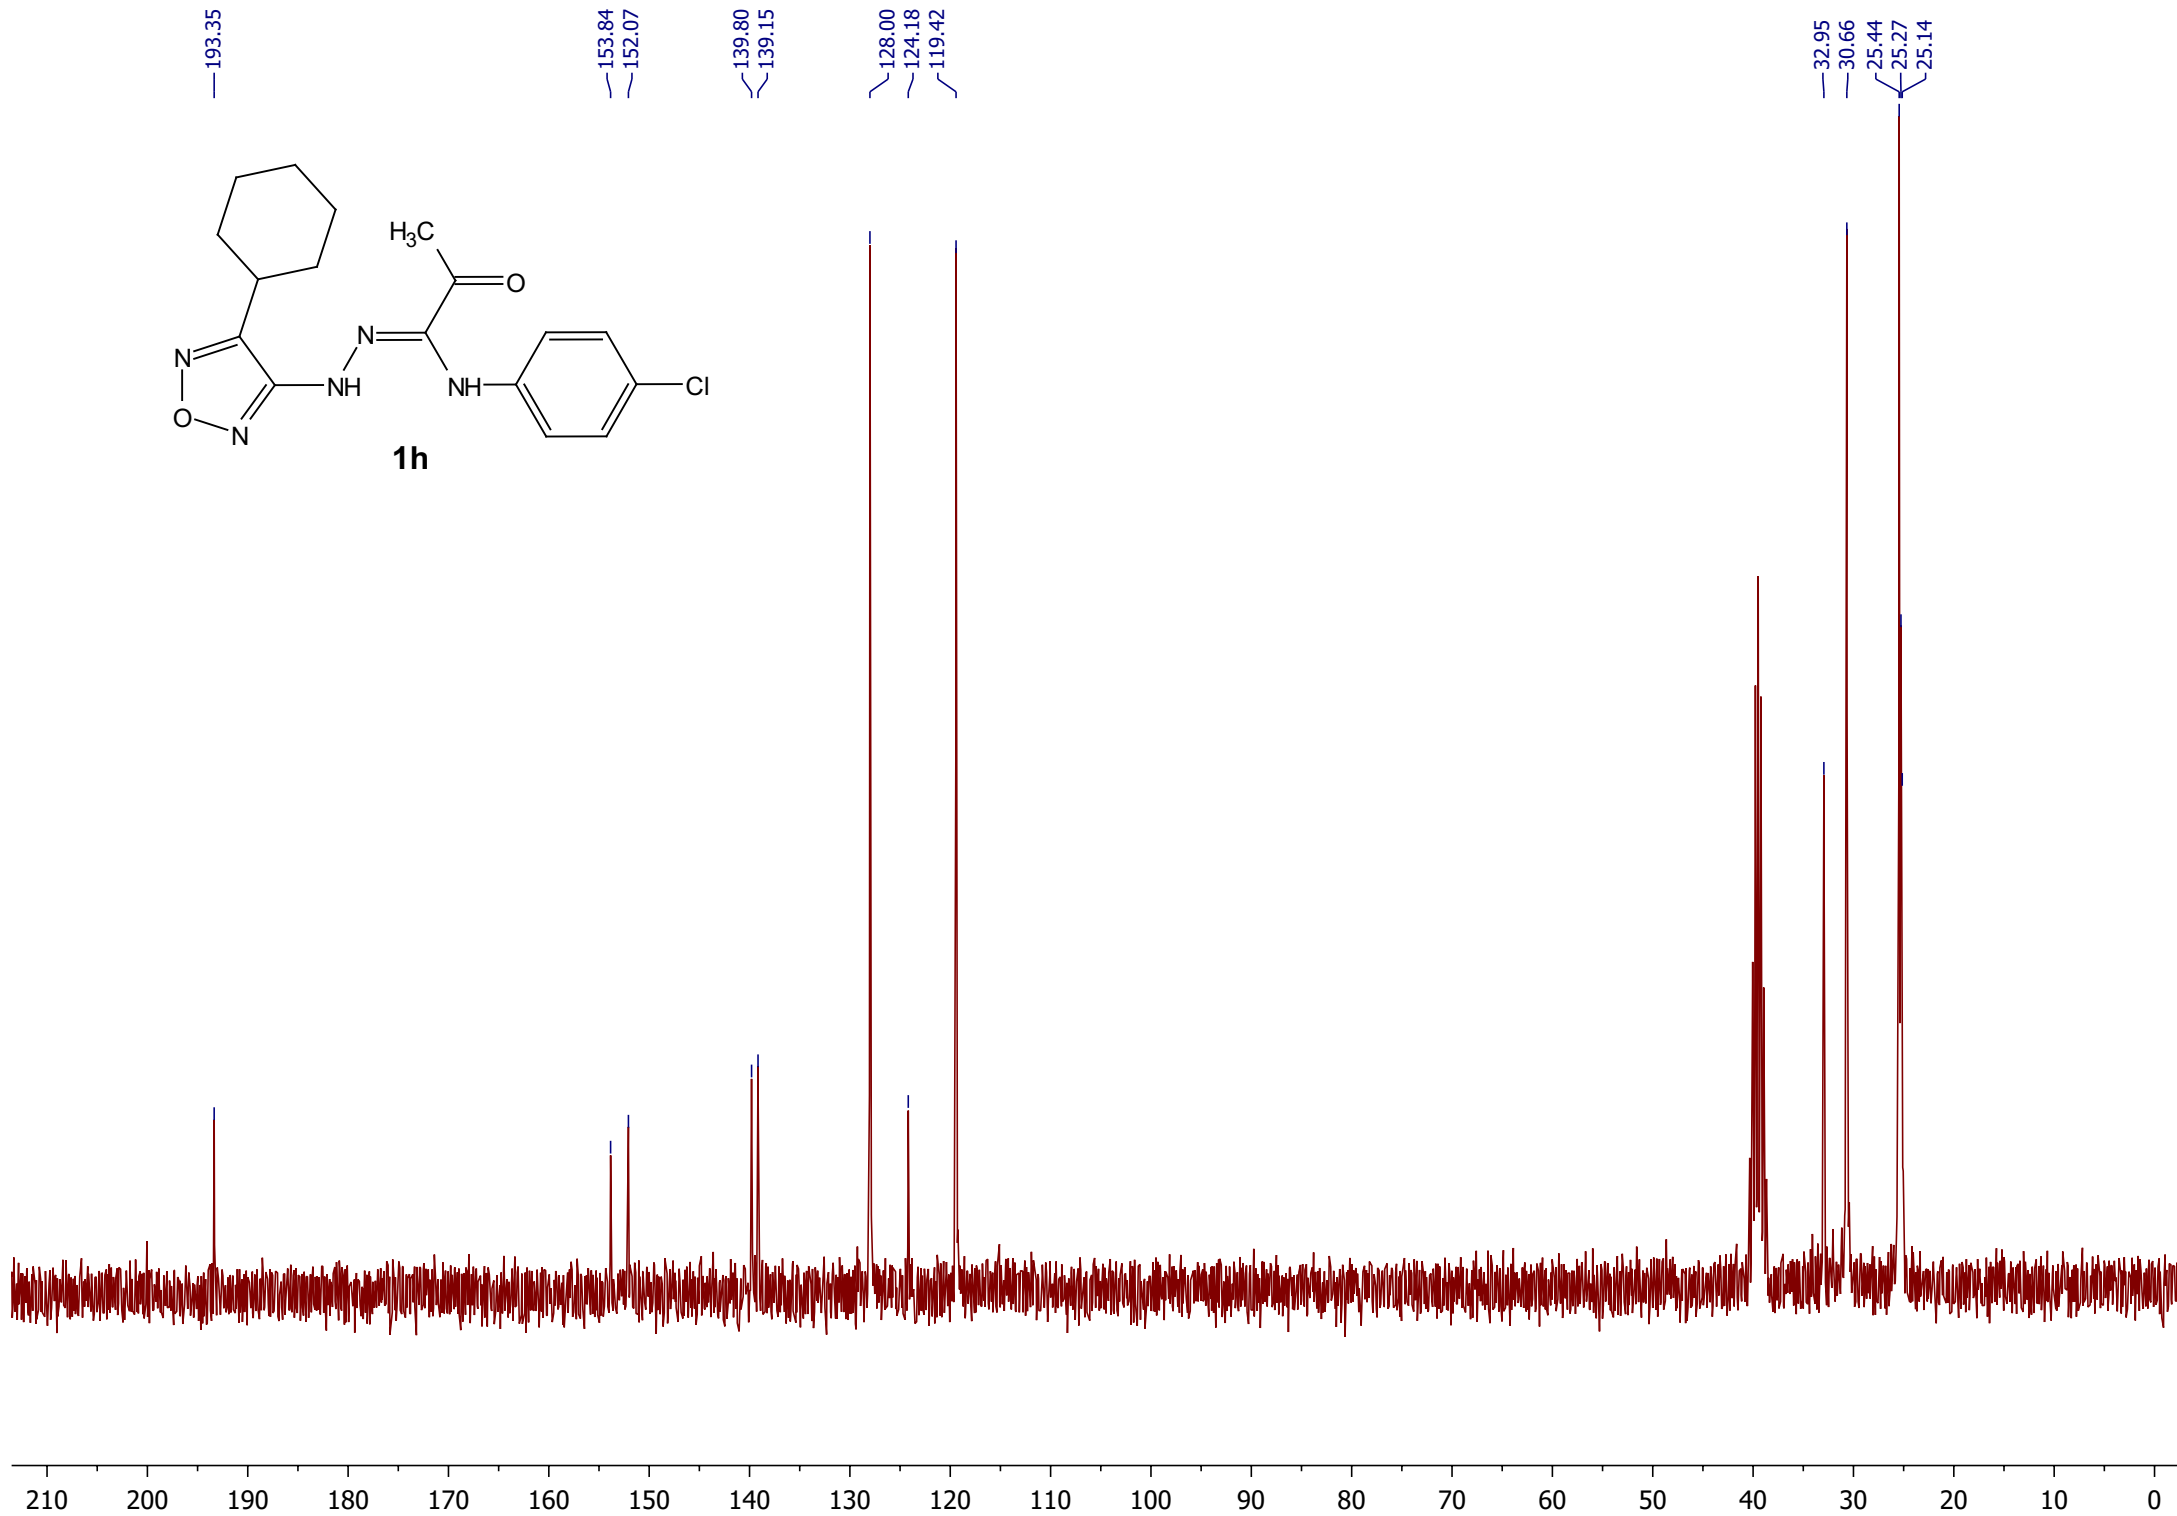

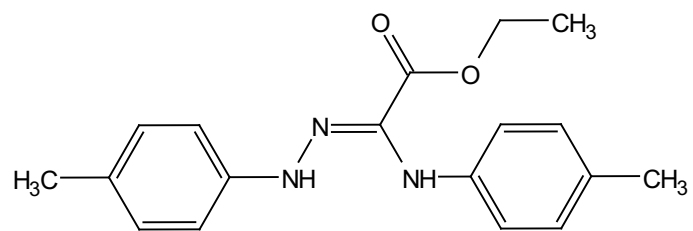

**1k**

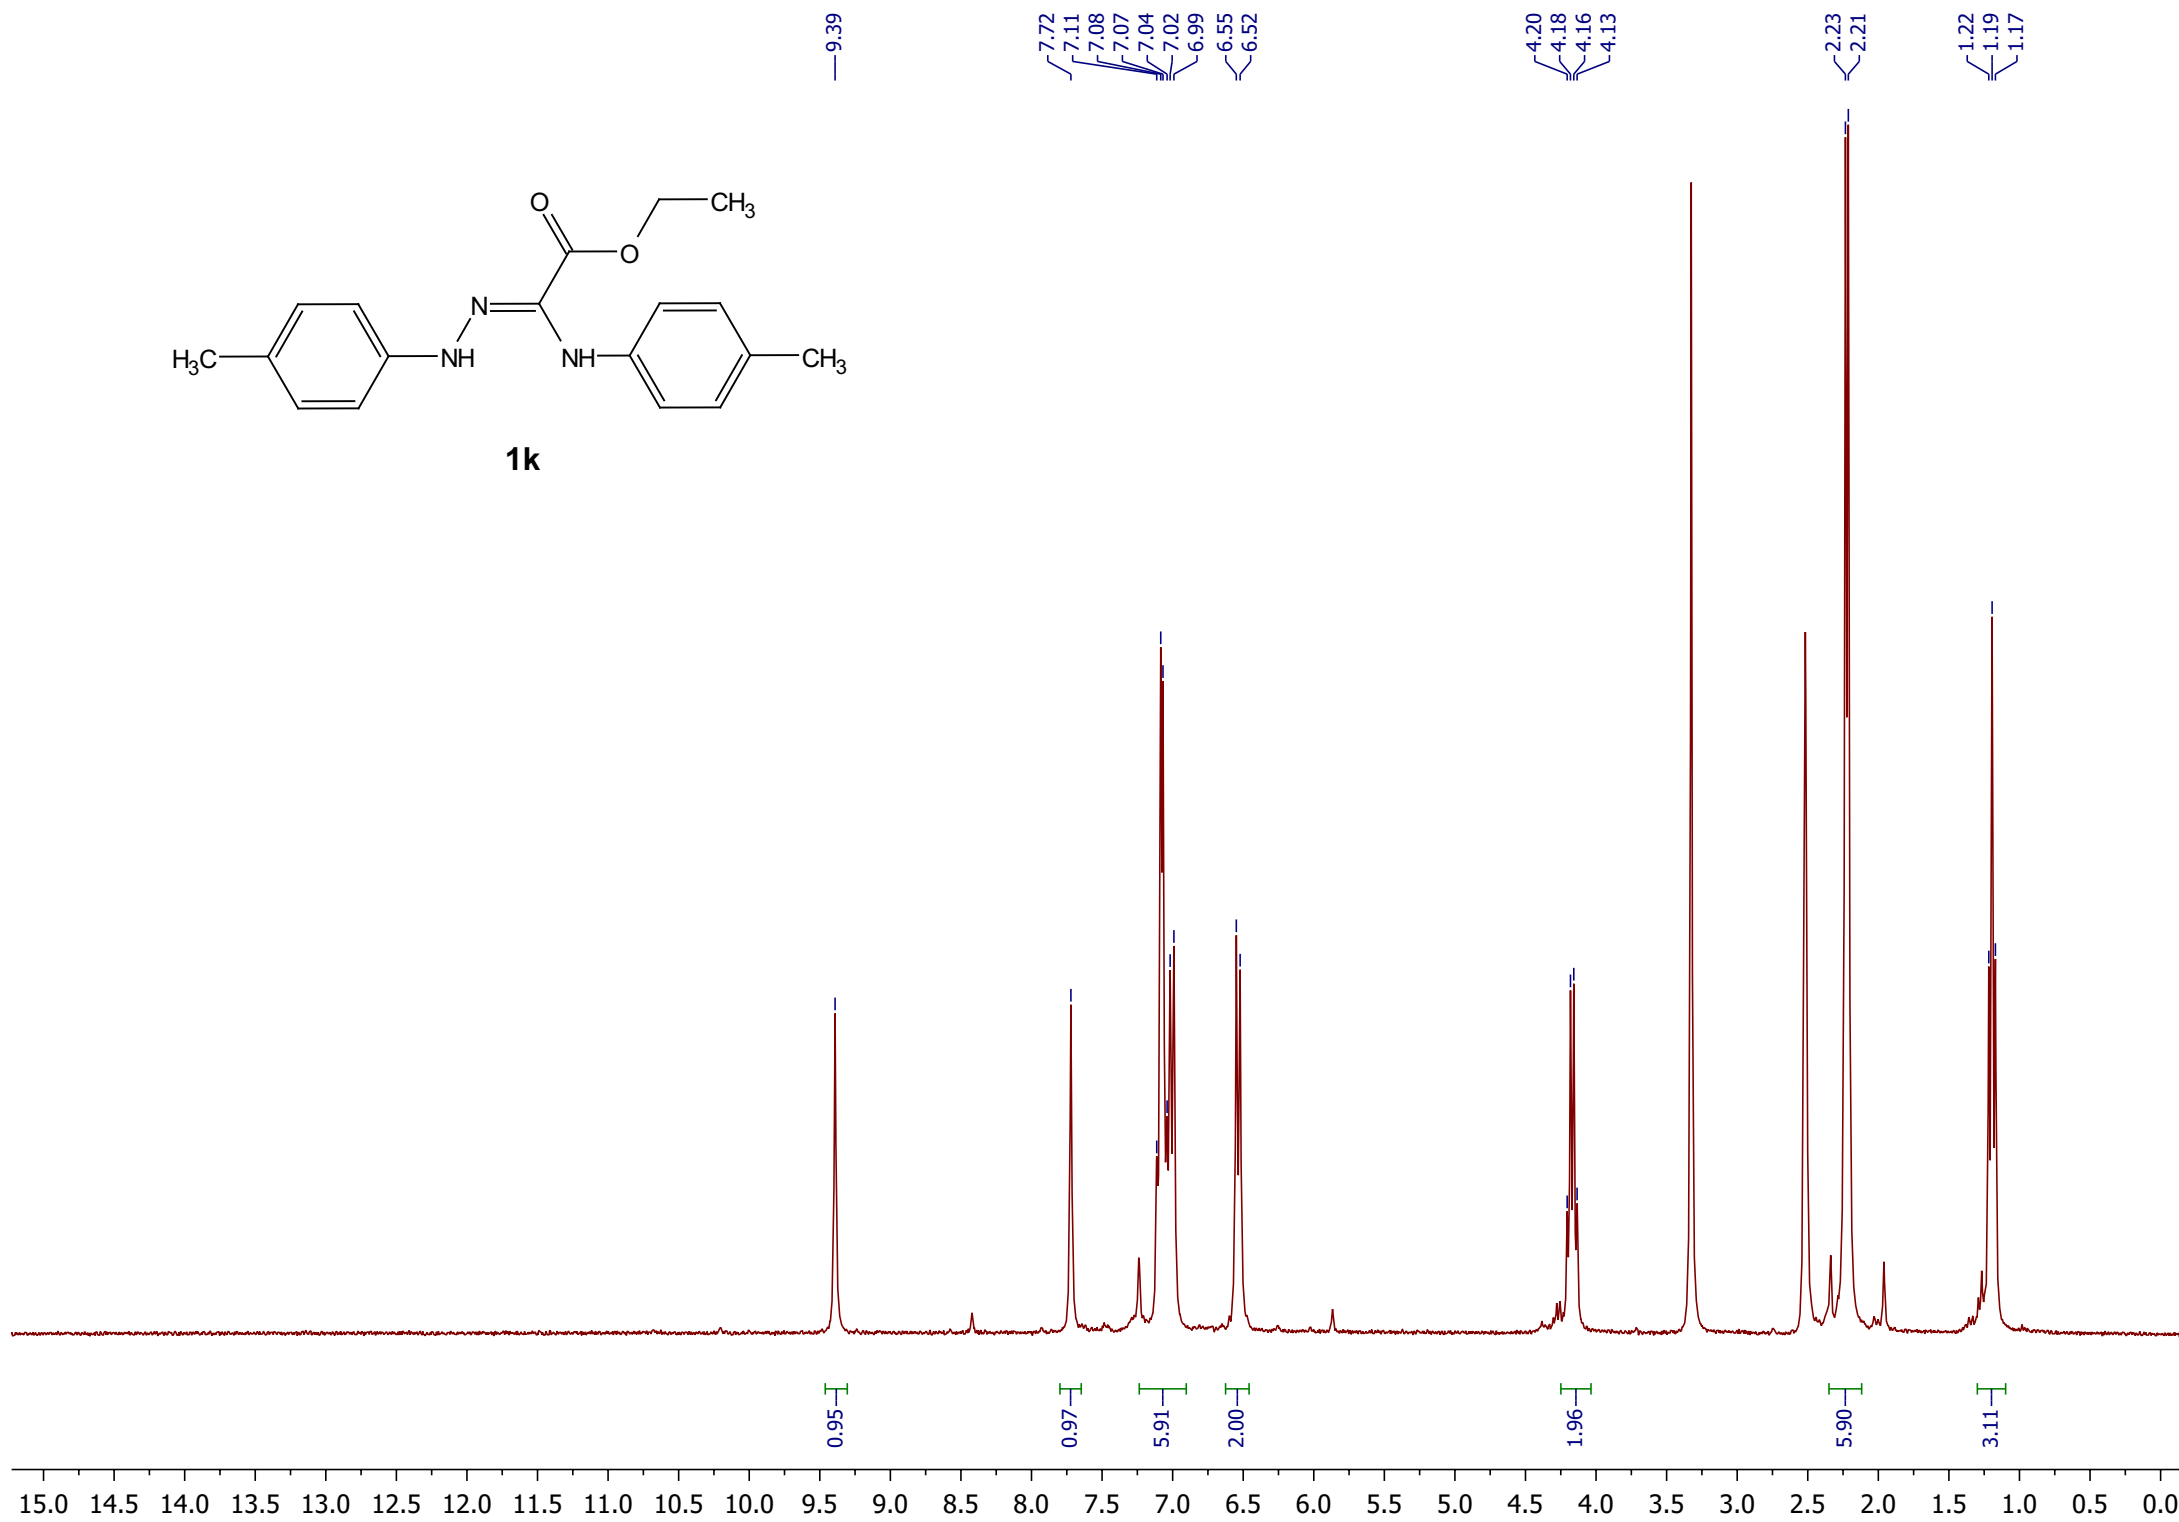

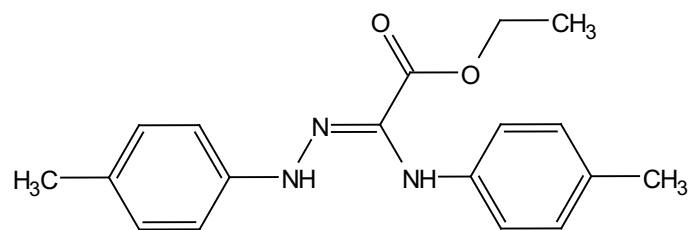

**1k**

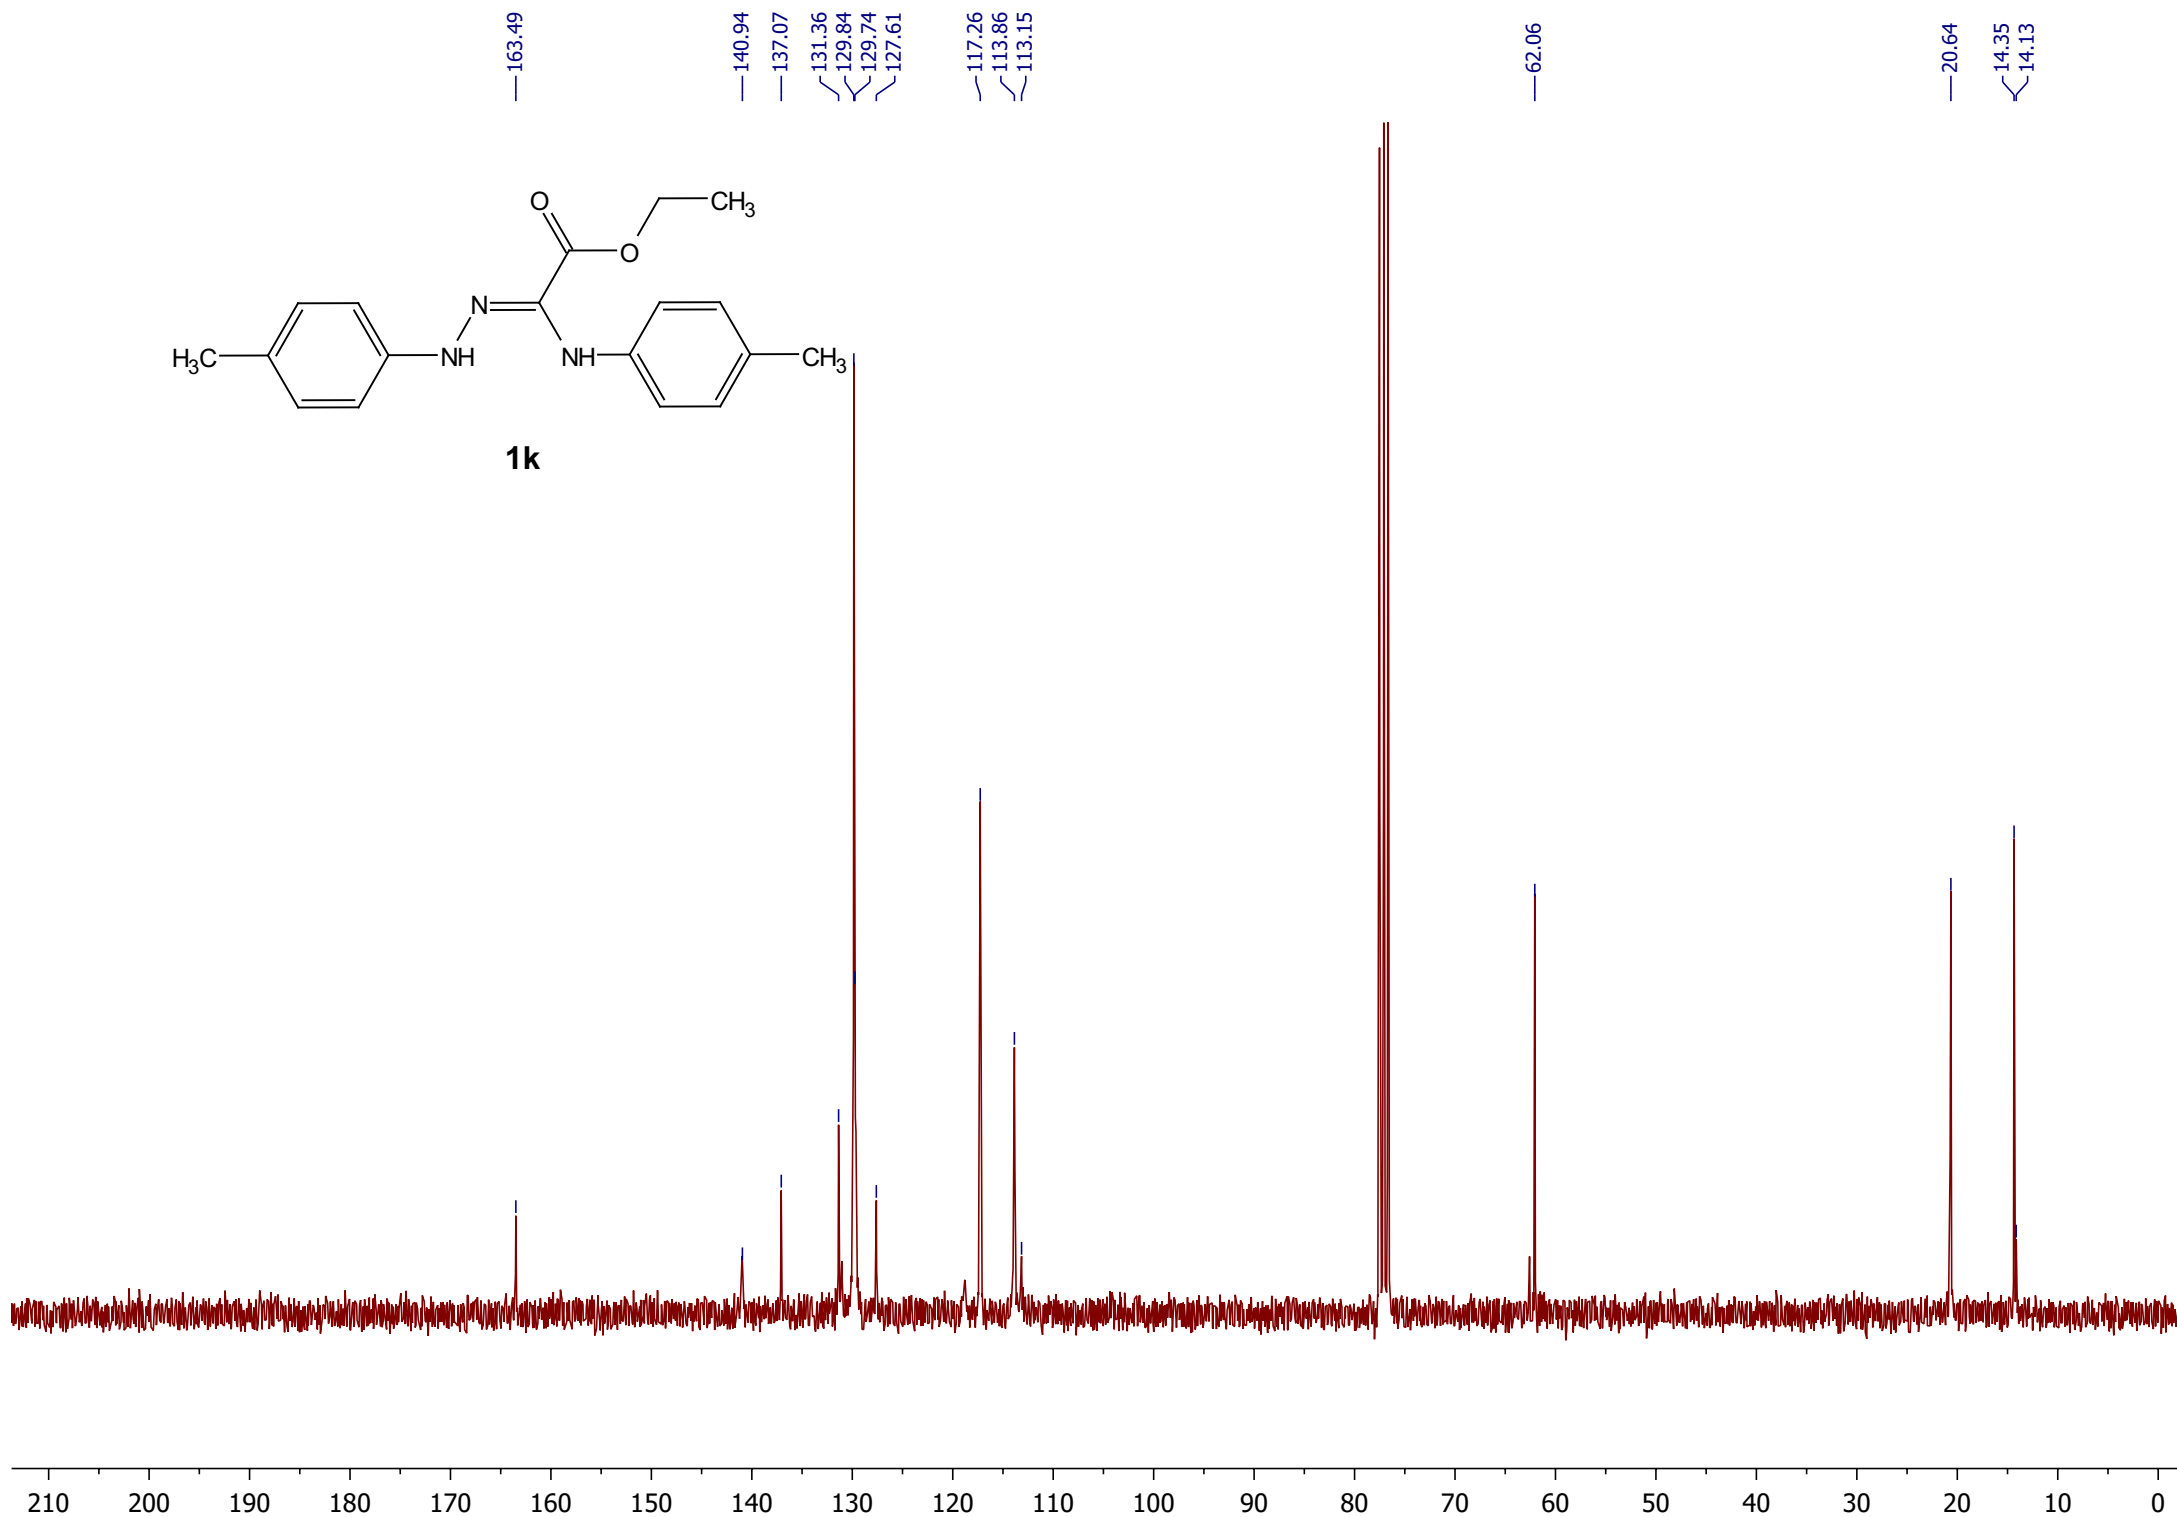



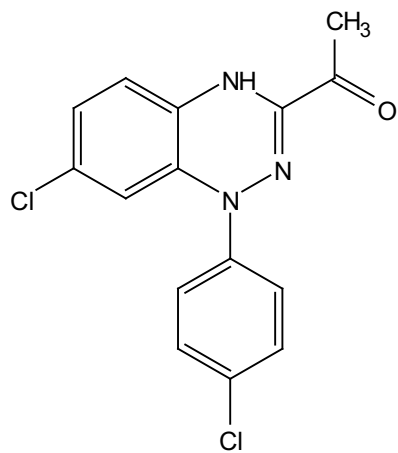

**5a**

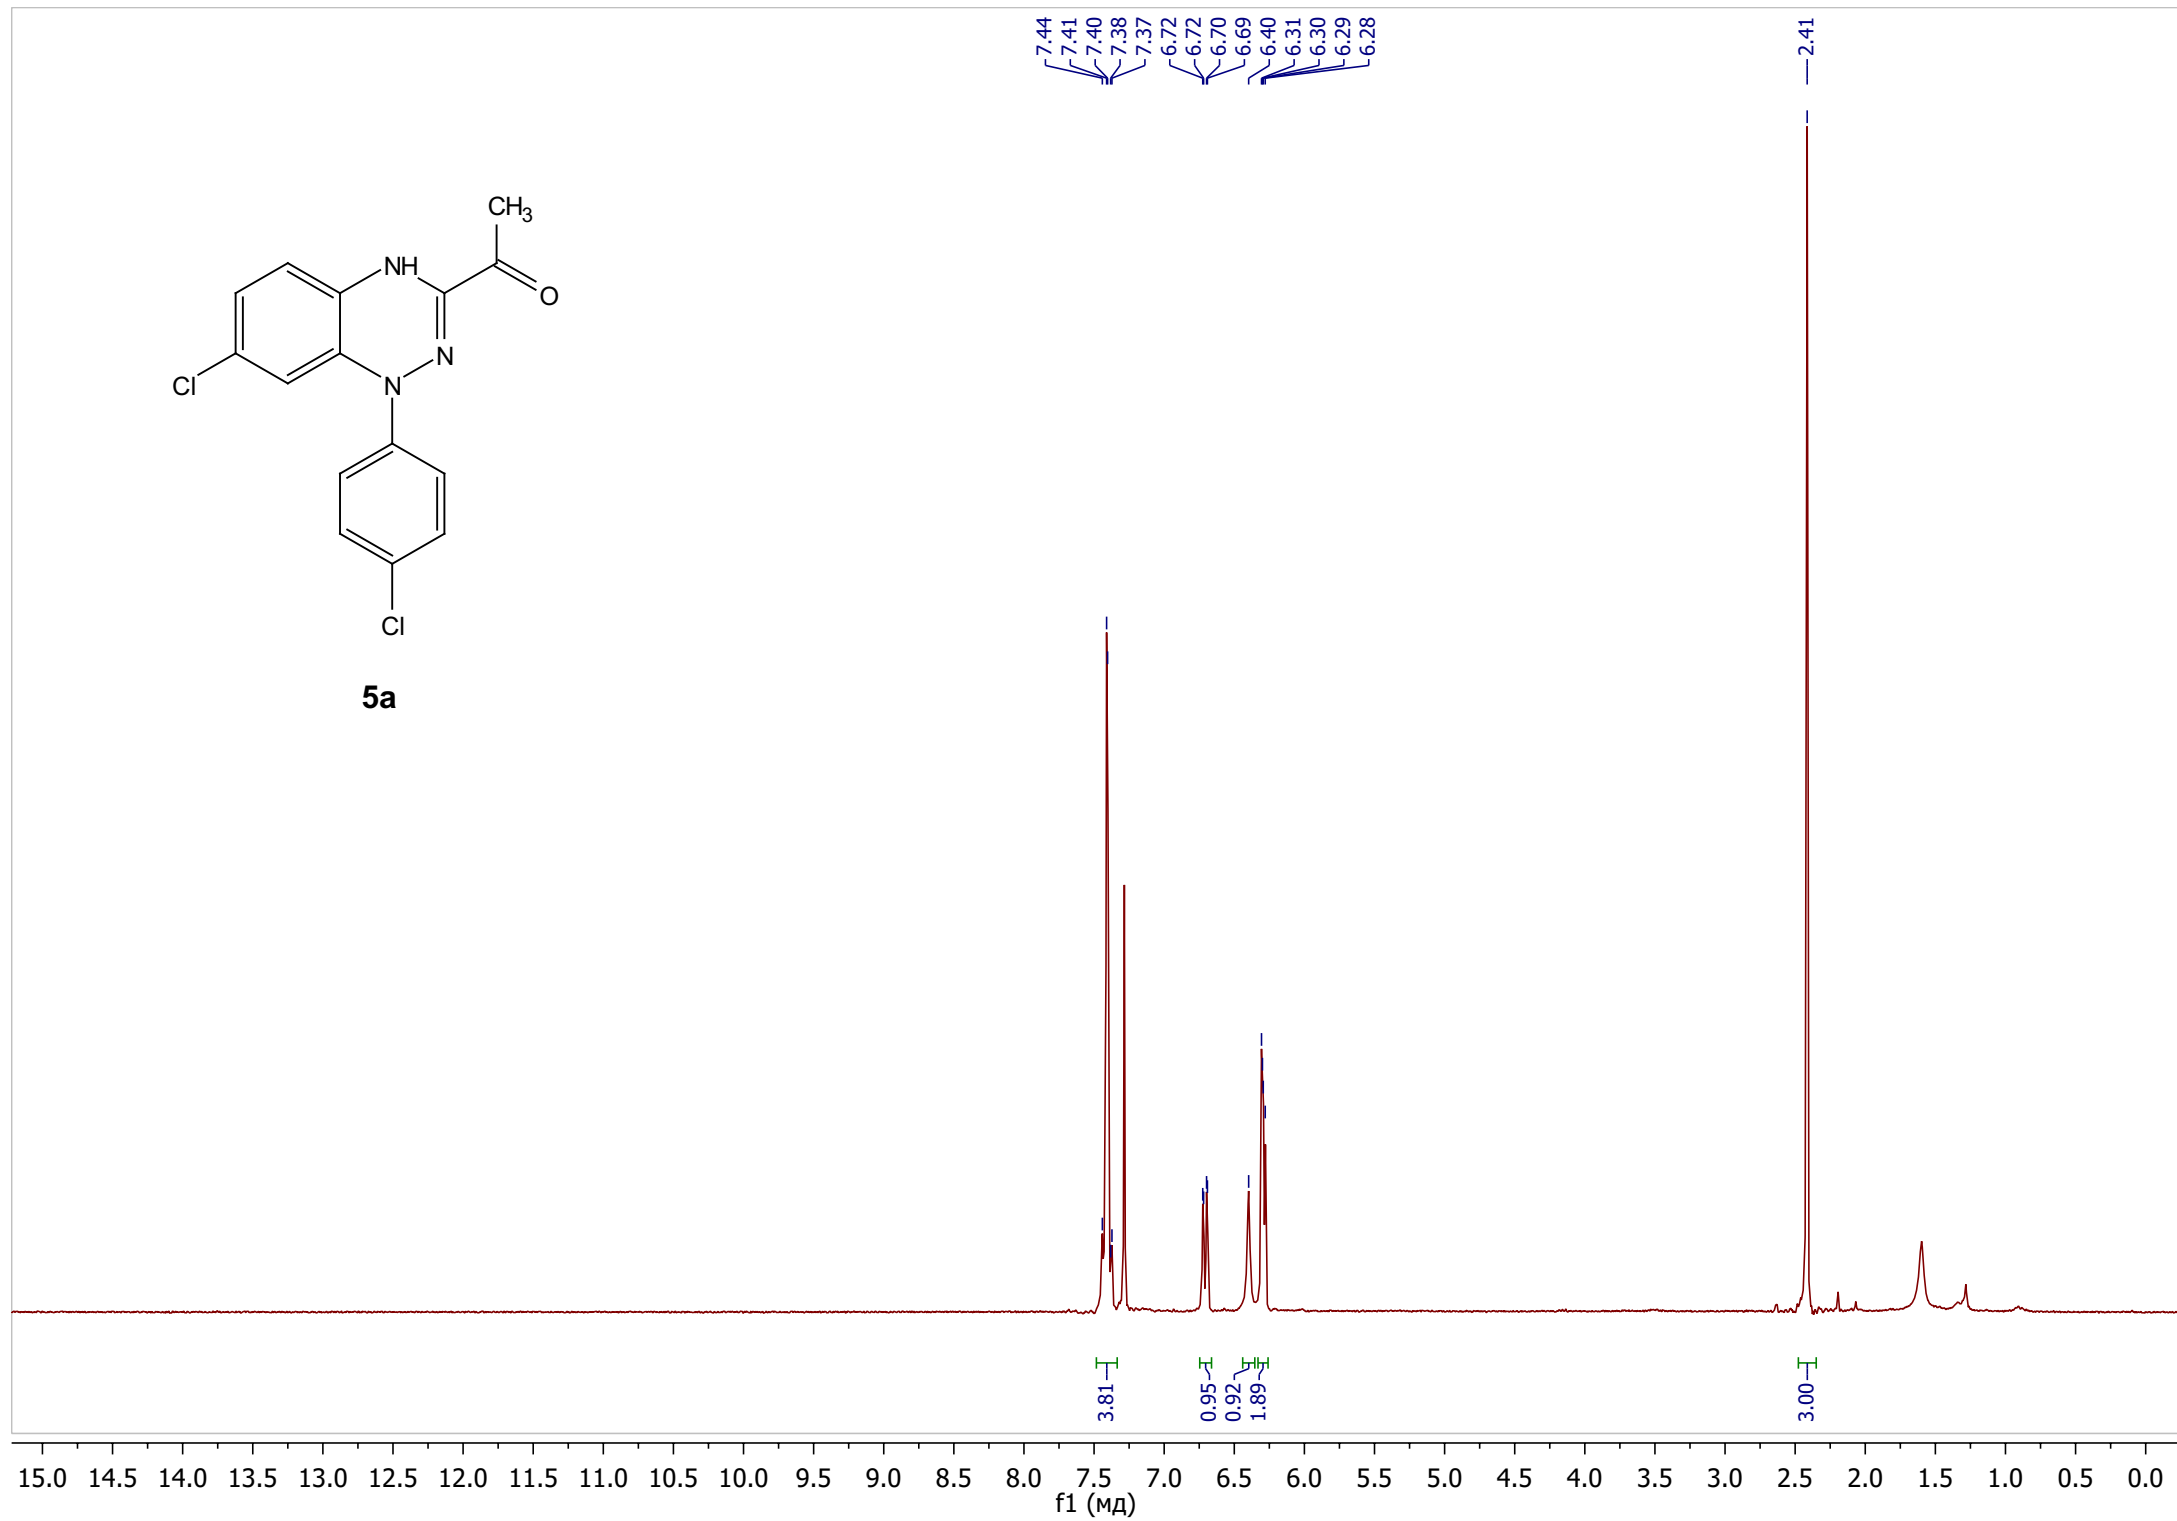



**5a**

— 191.05

— 143.82

— 141.01

— 133.71

— 131.29

— 130.89

— 129.60

— 129.09

— 124.27

— 124.03

— 114.25

— 112.73

— 23.65

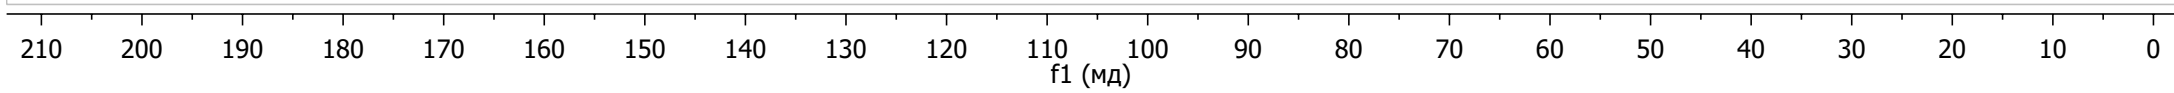

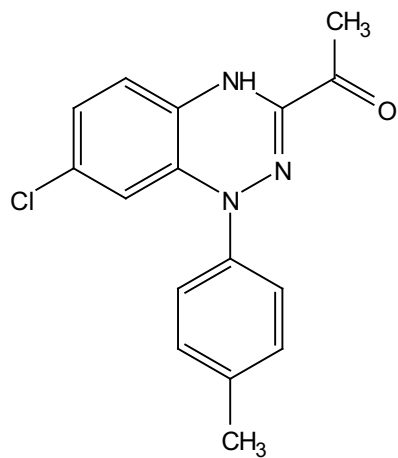

**5b**

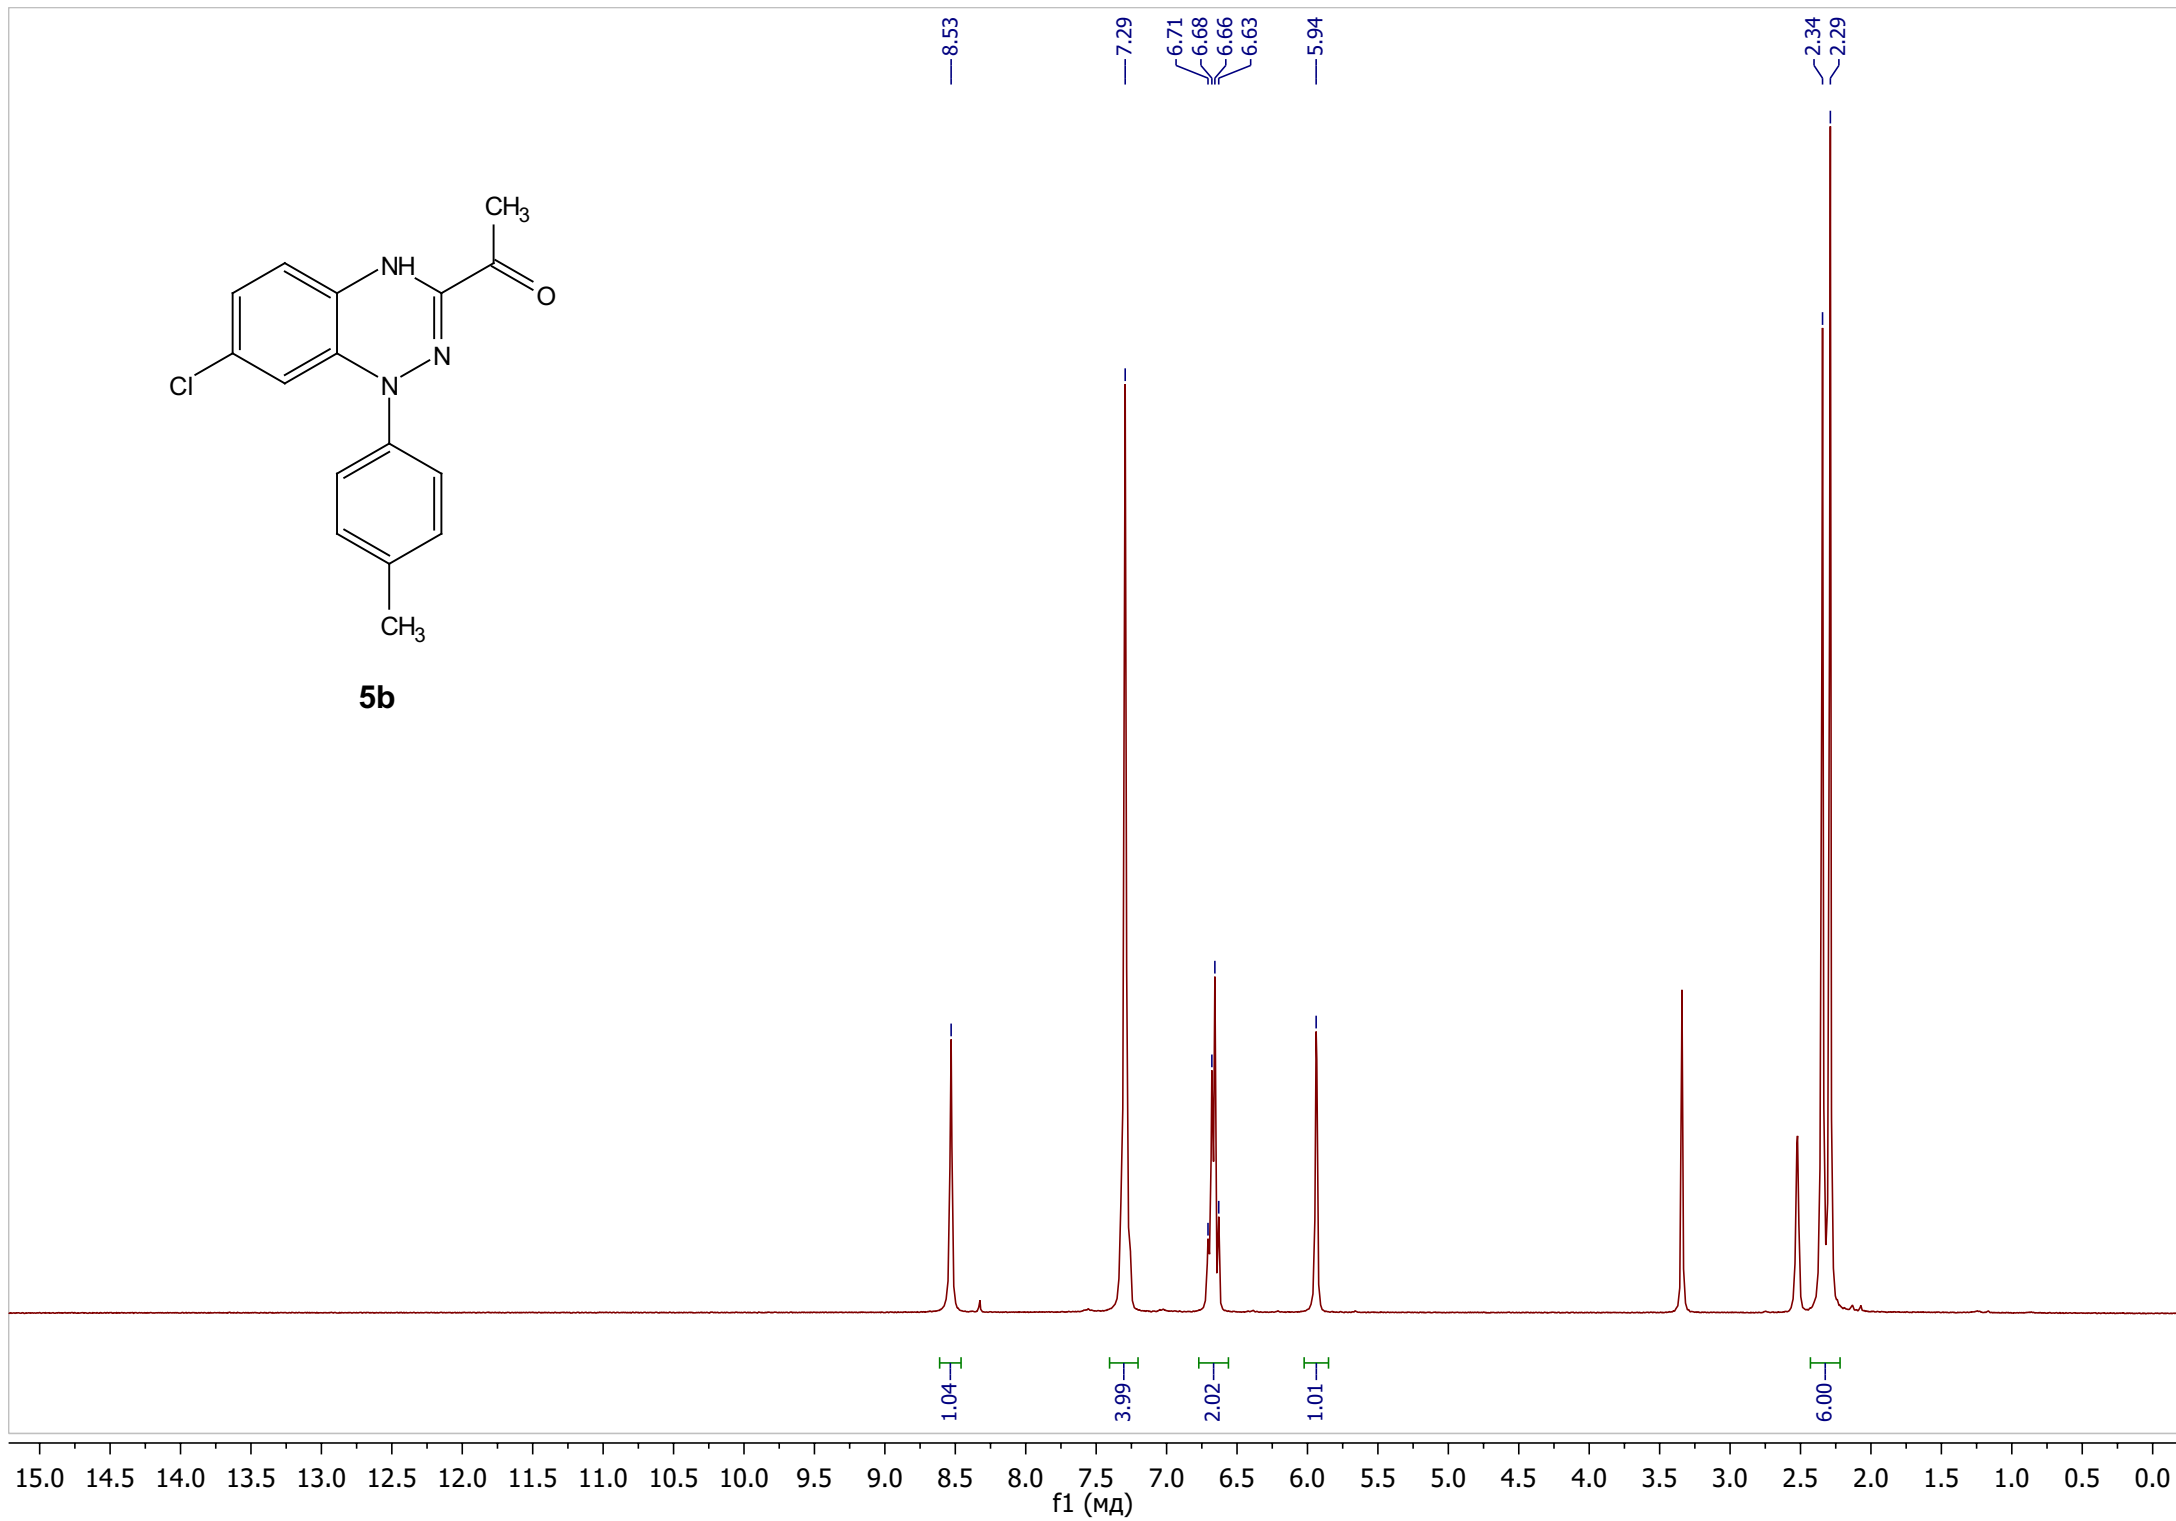



**5b**

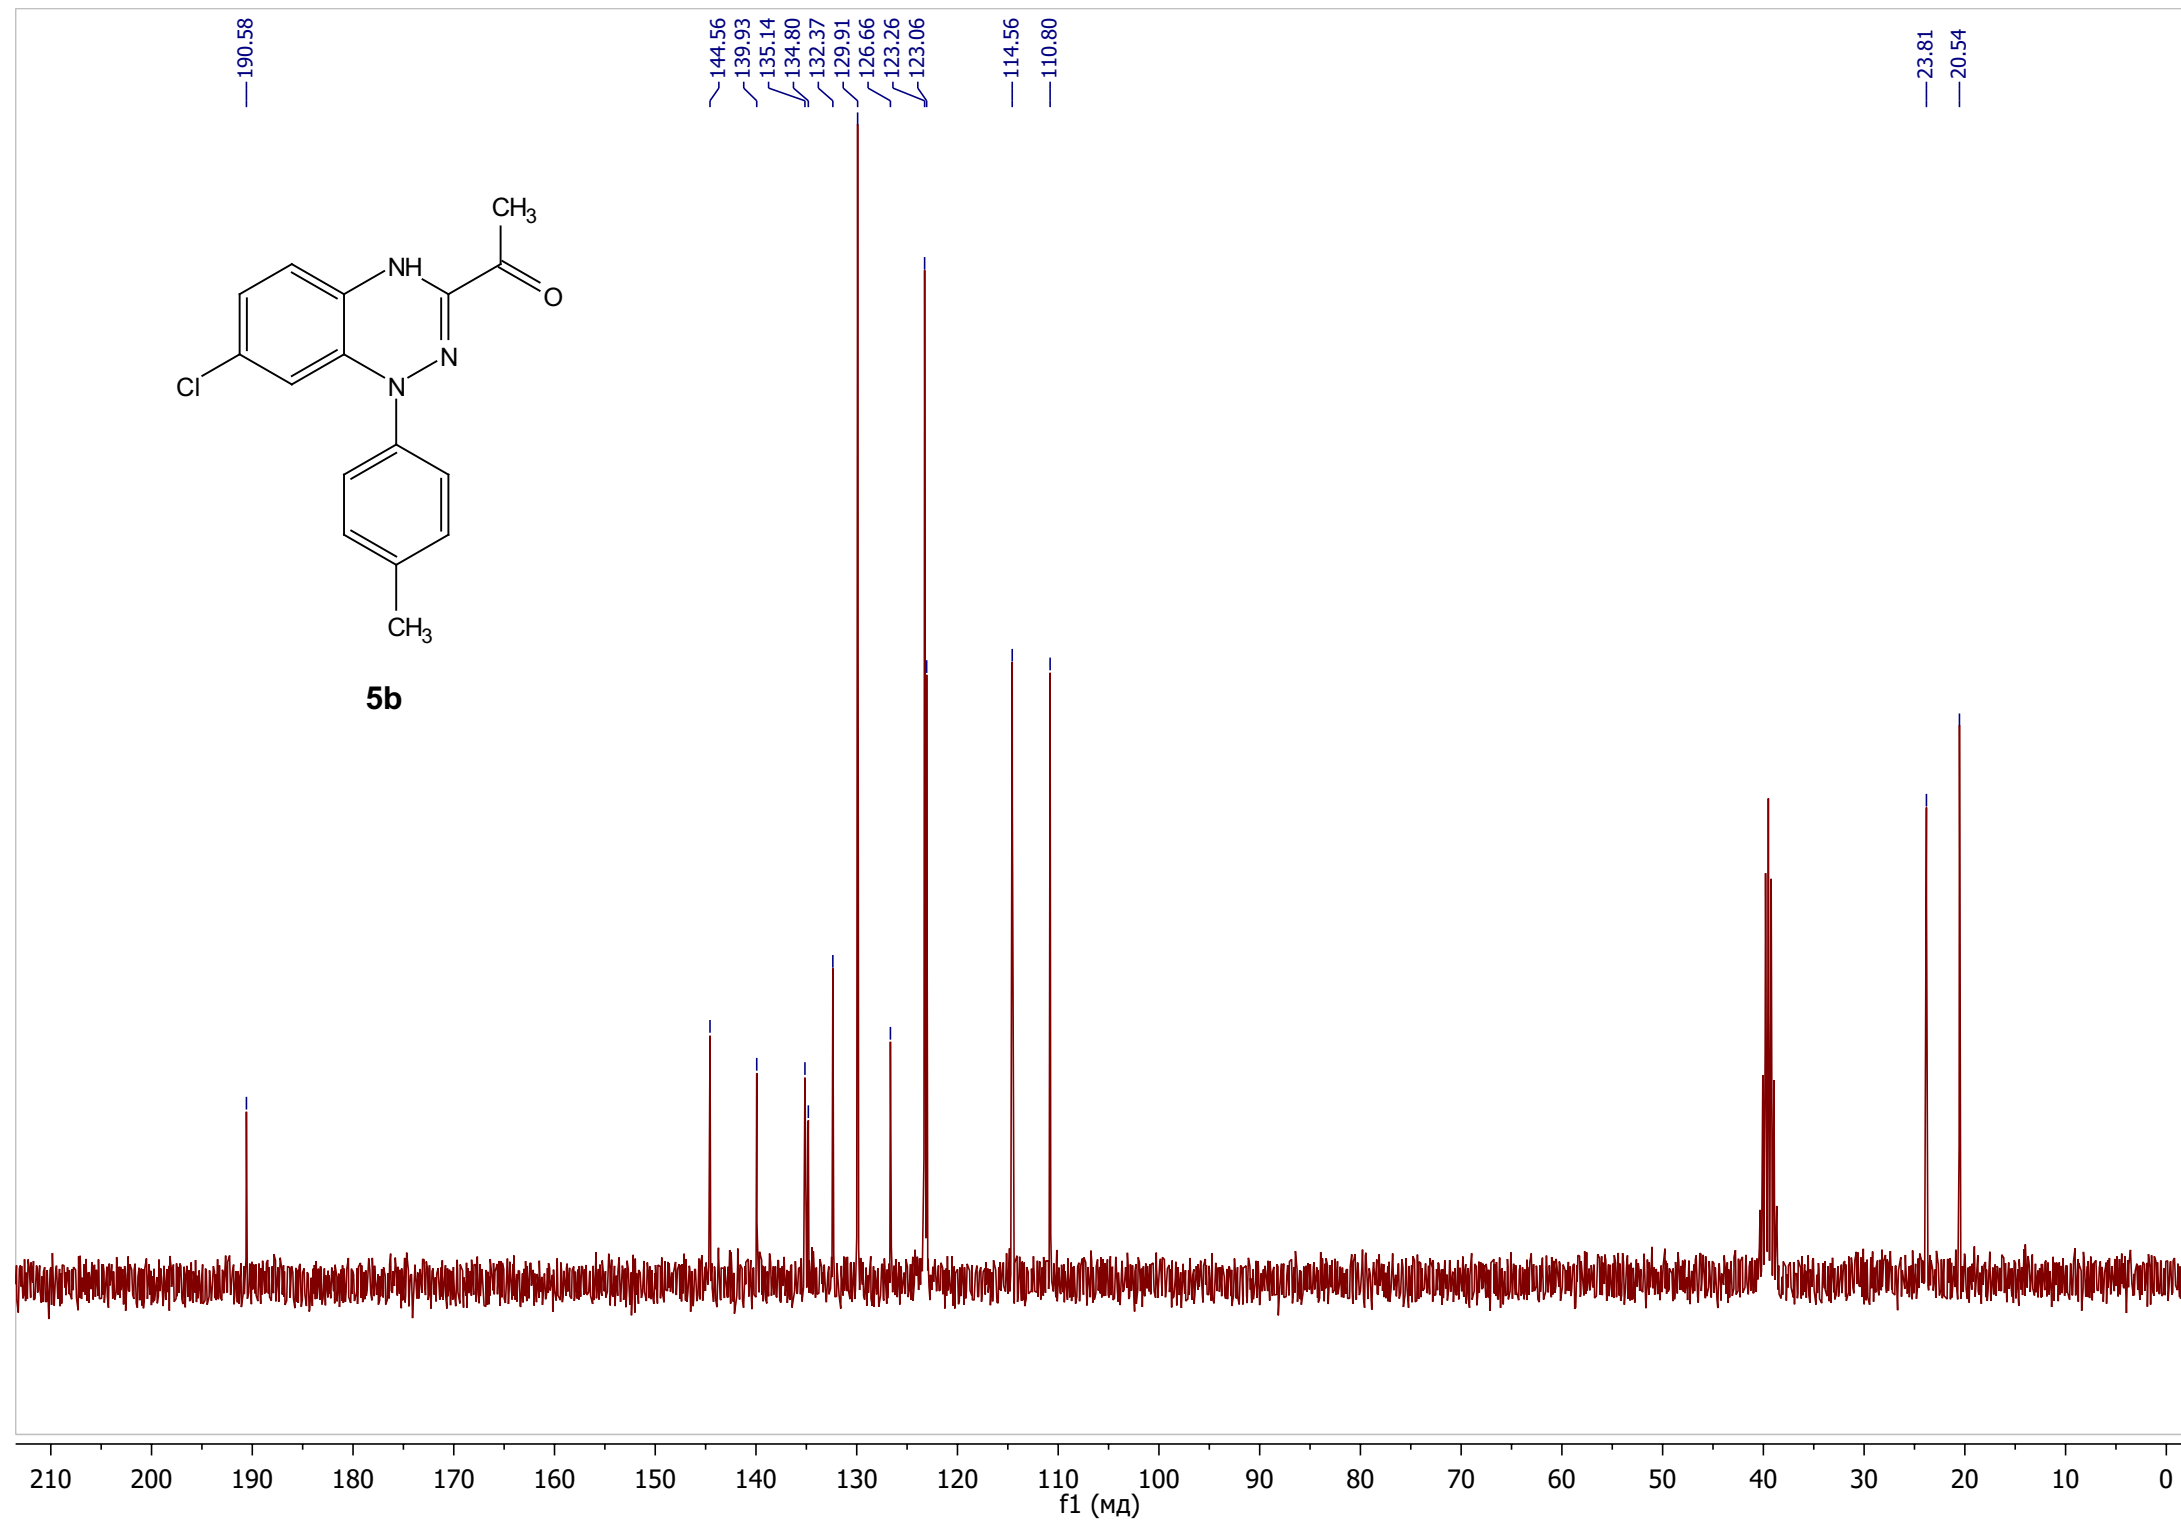

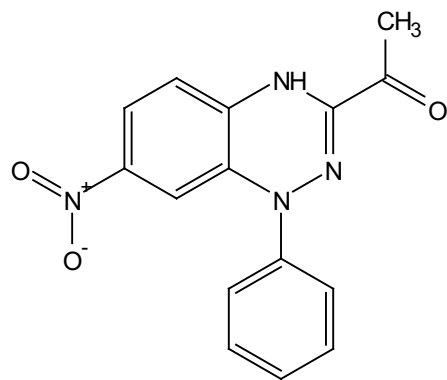

**5c**

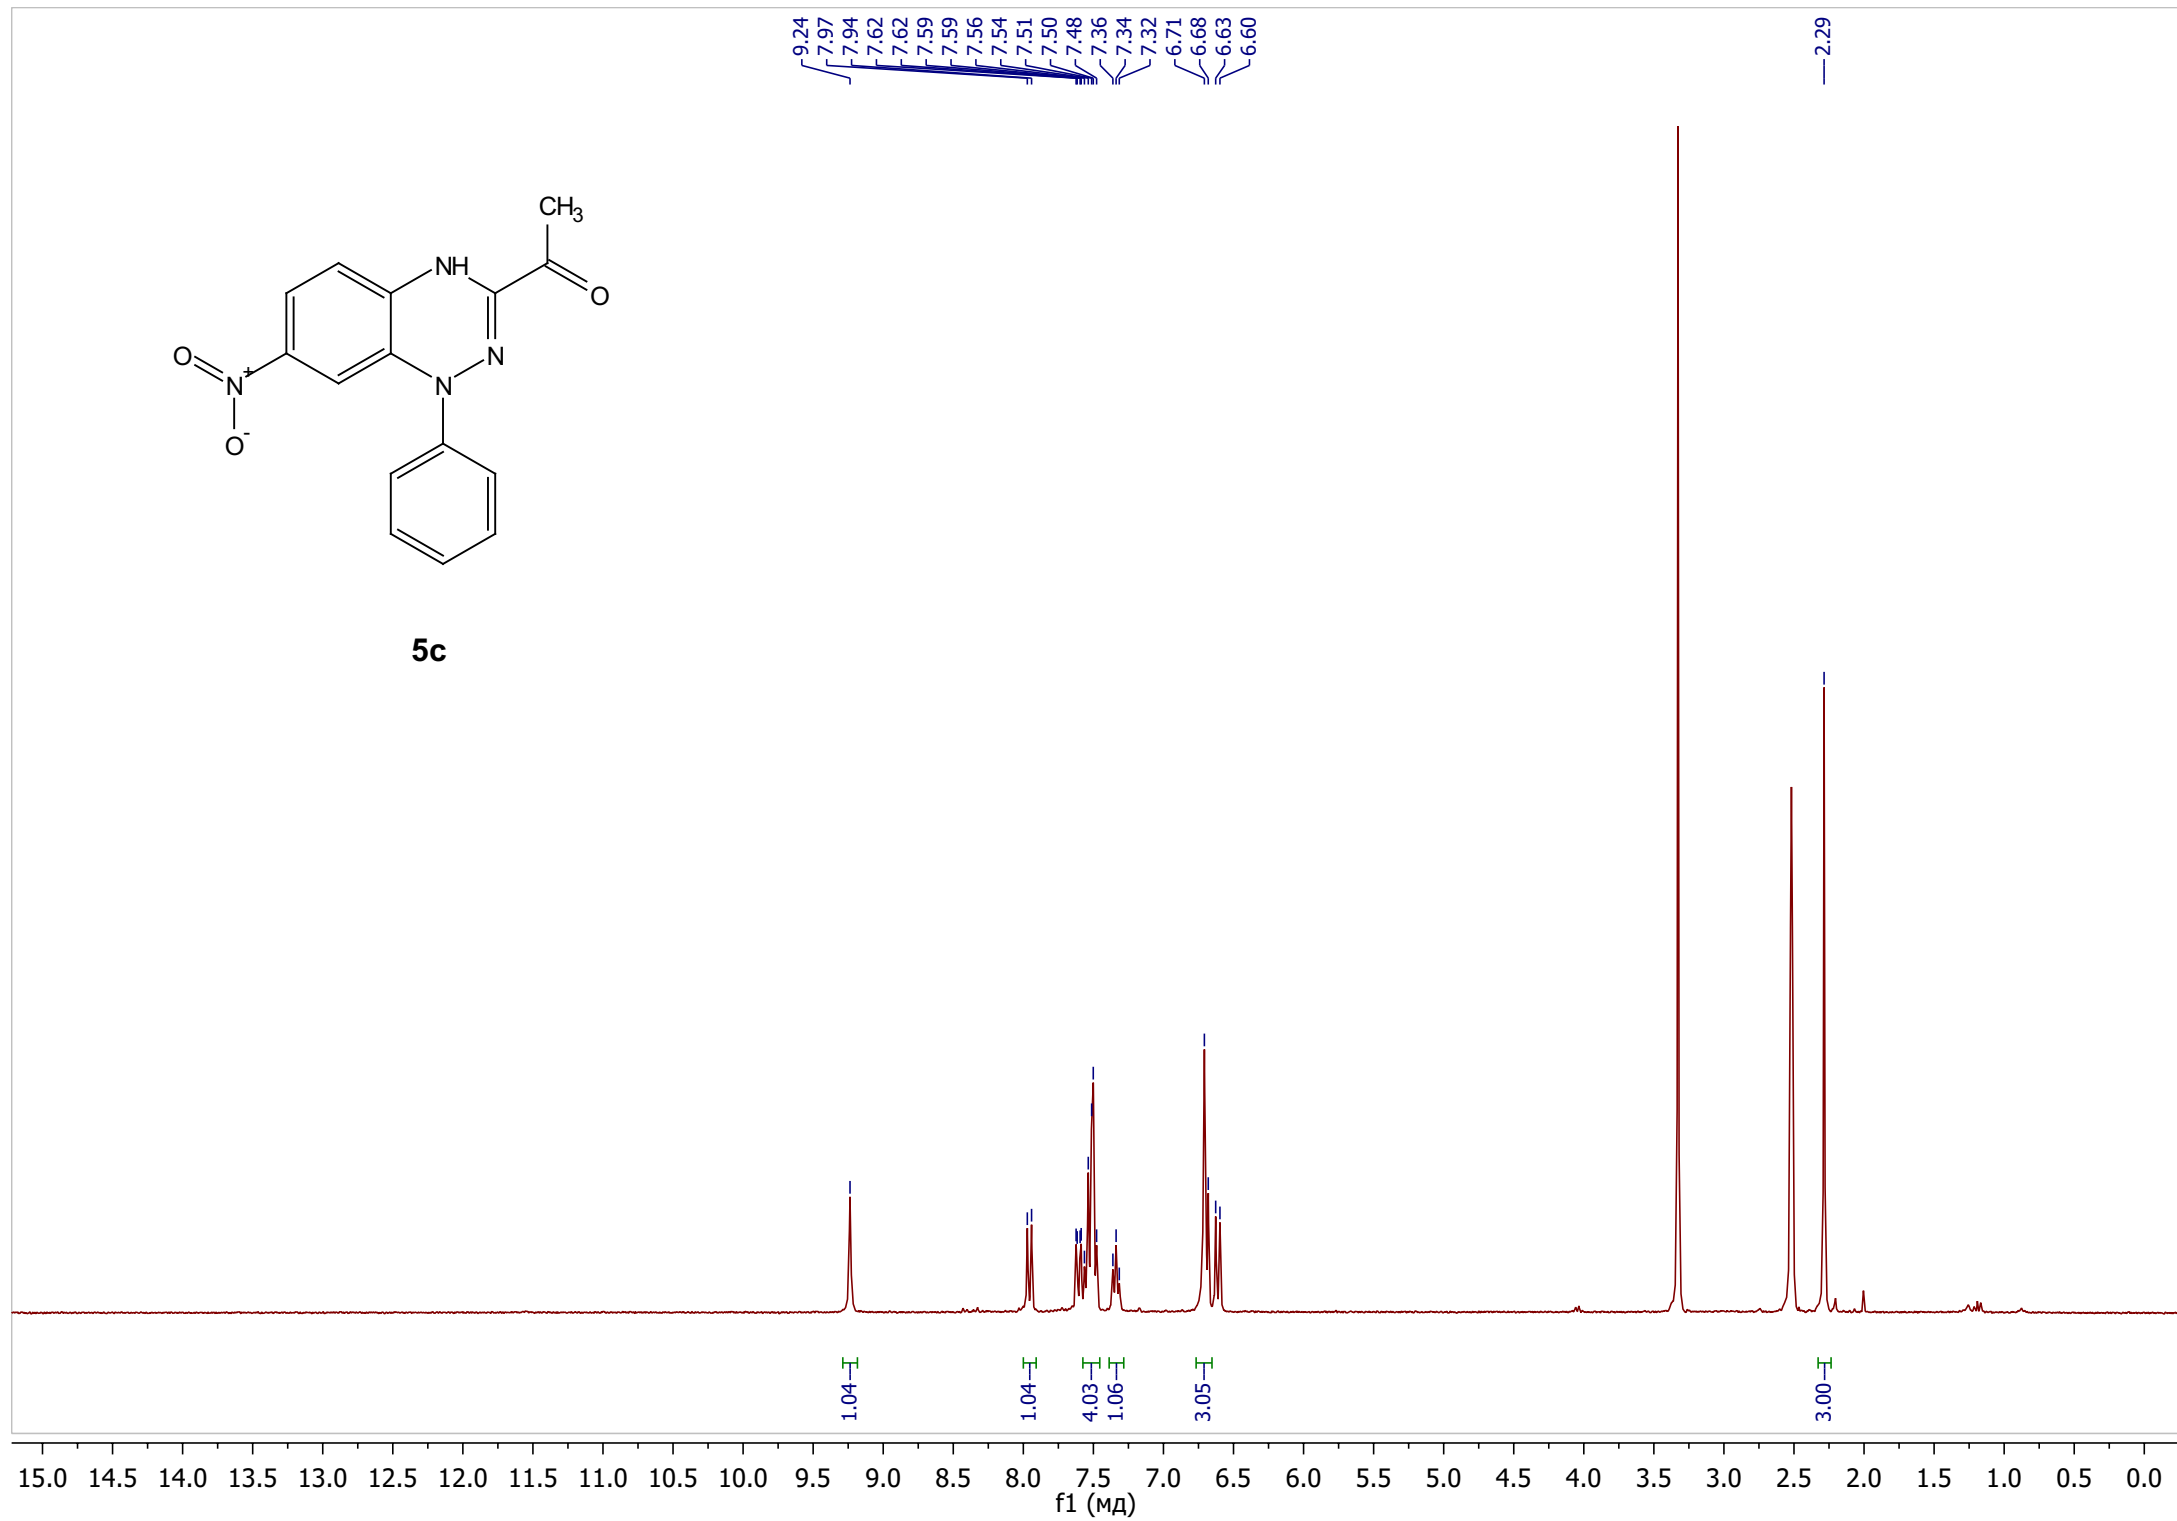



**5c**

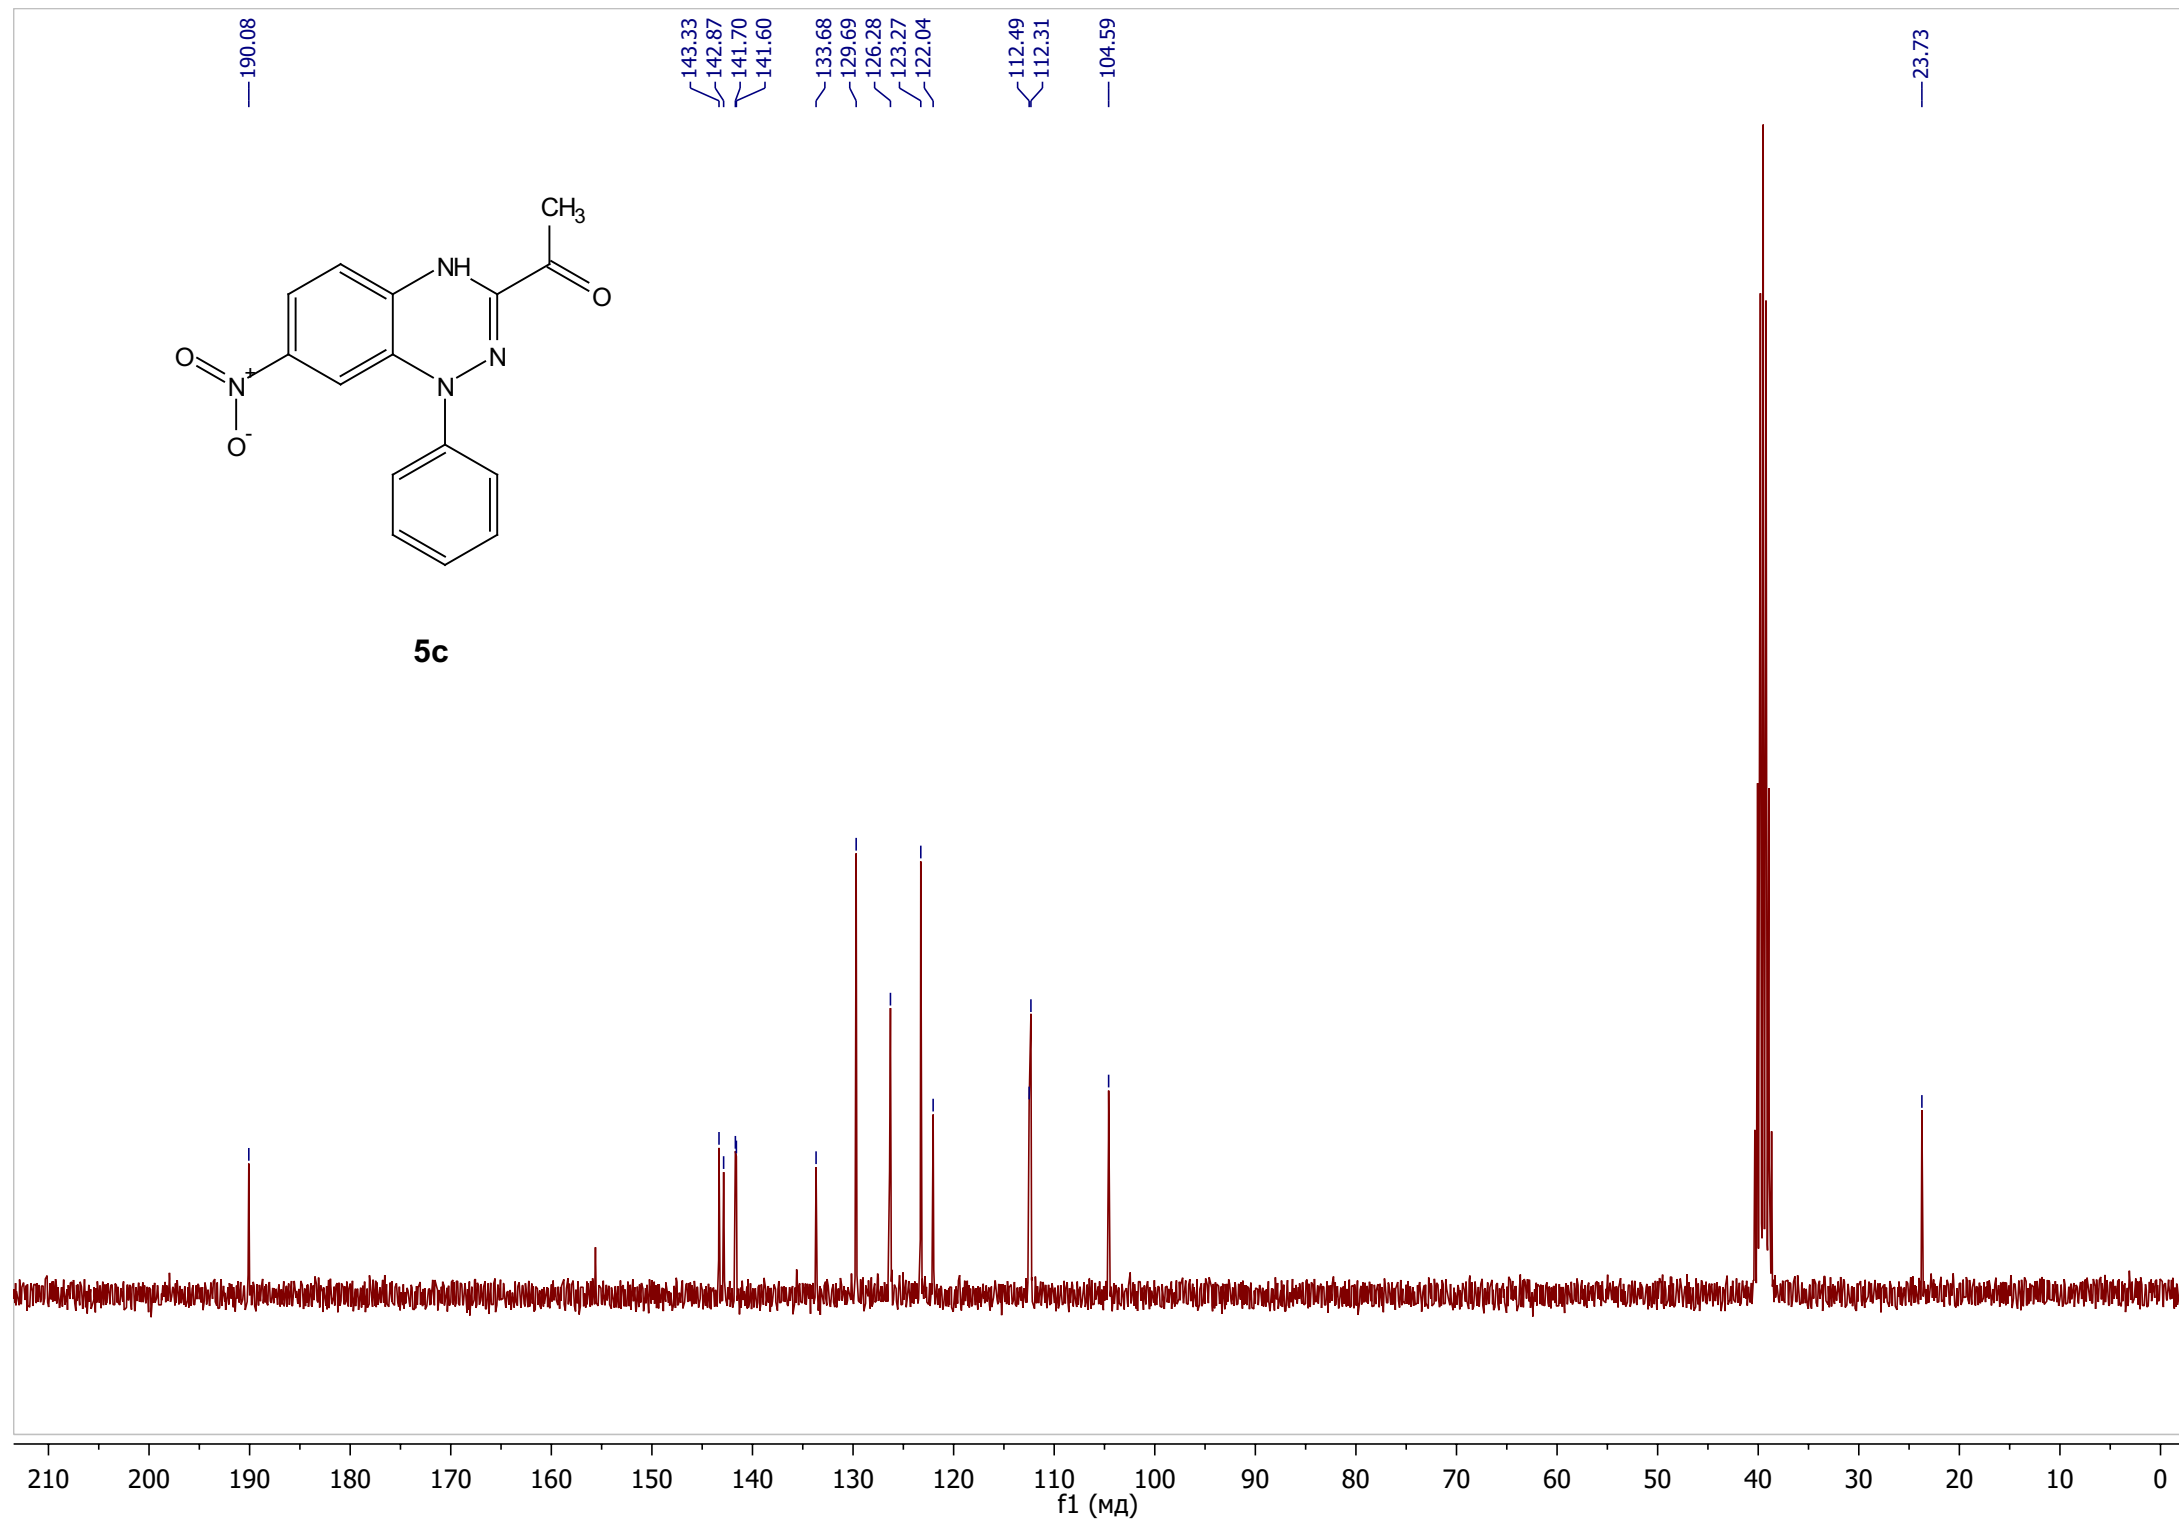

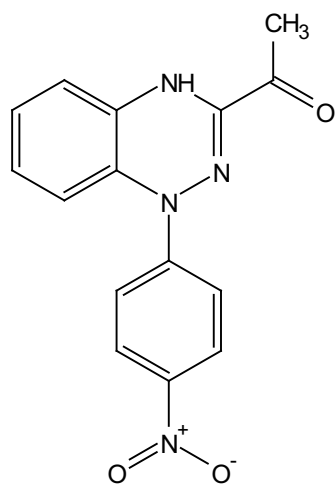

**5d**

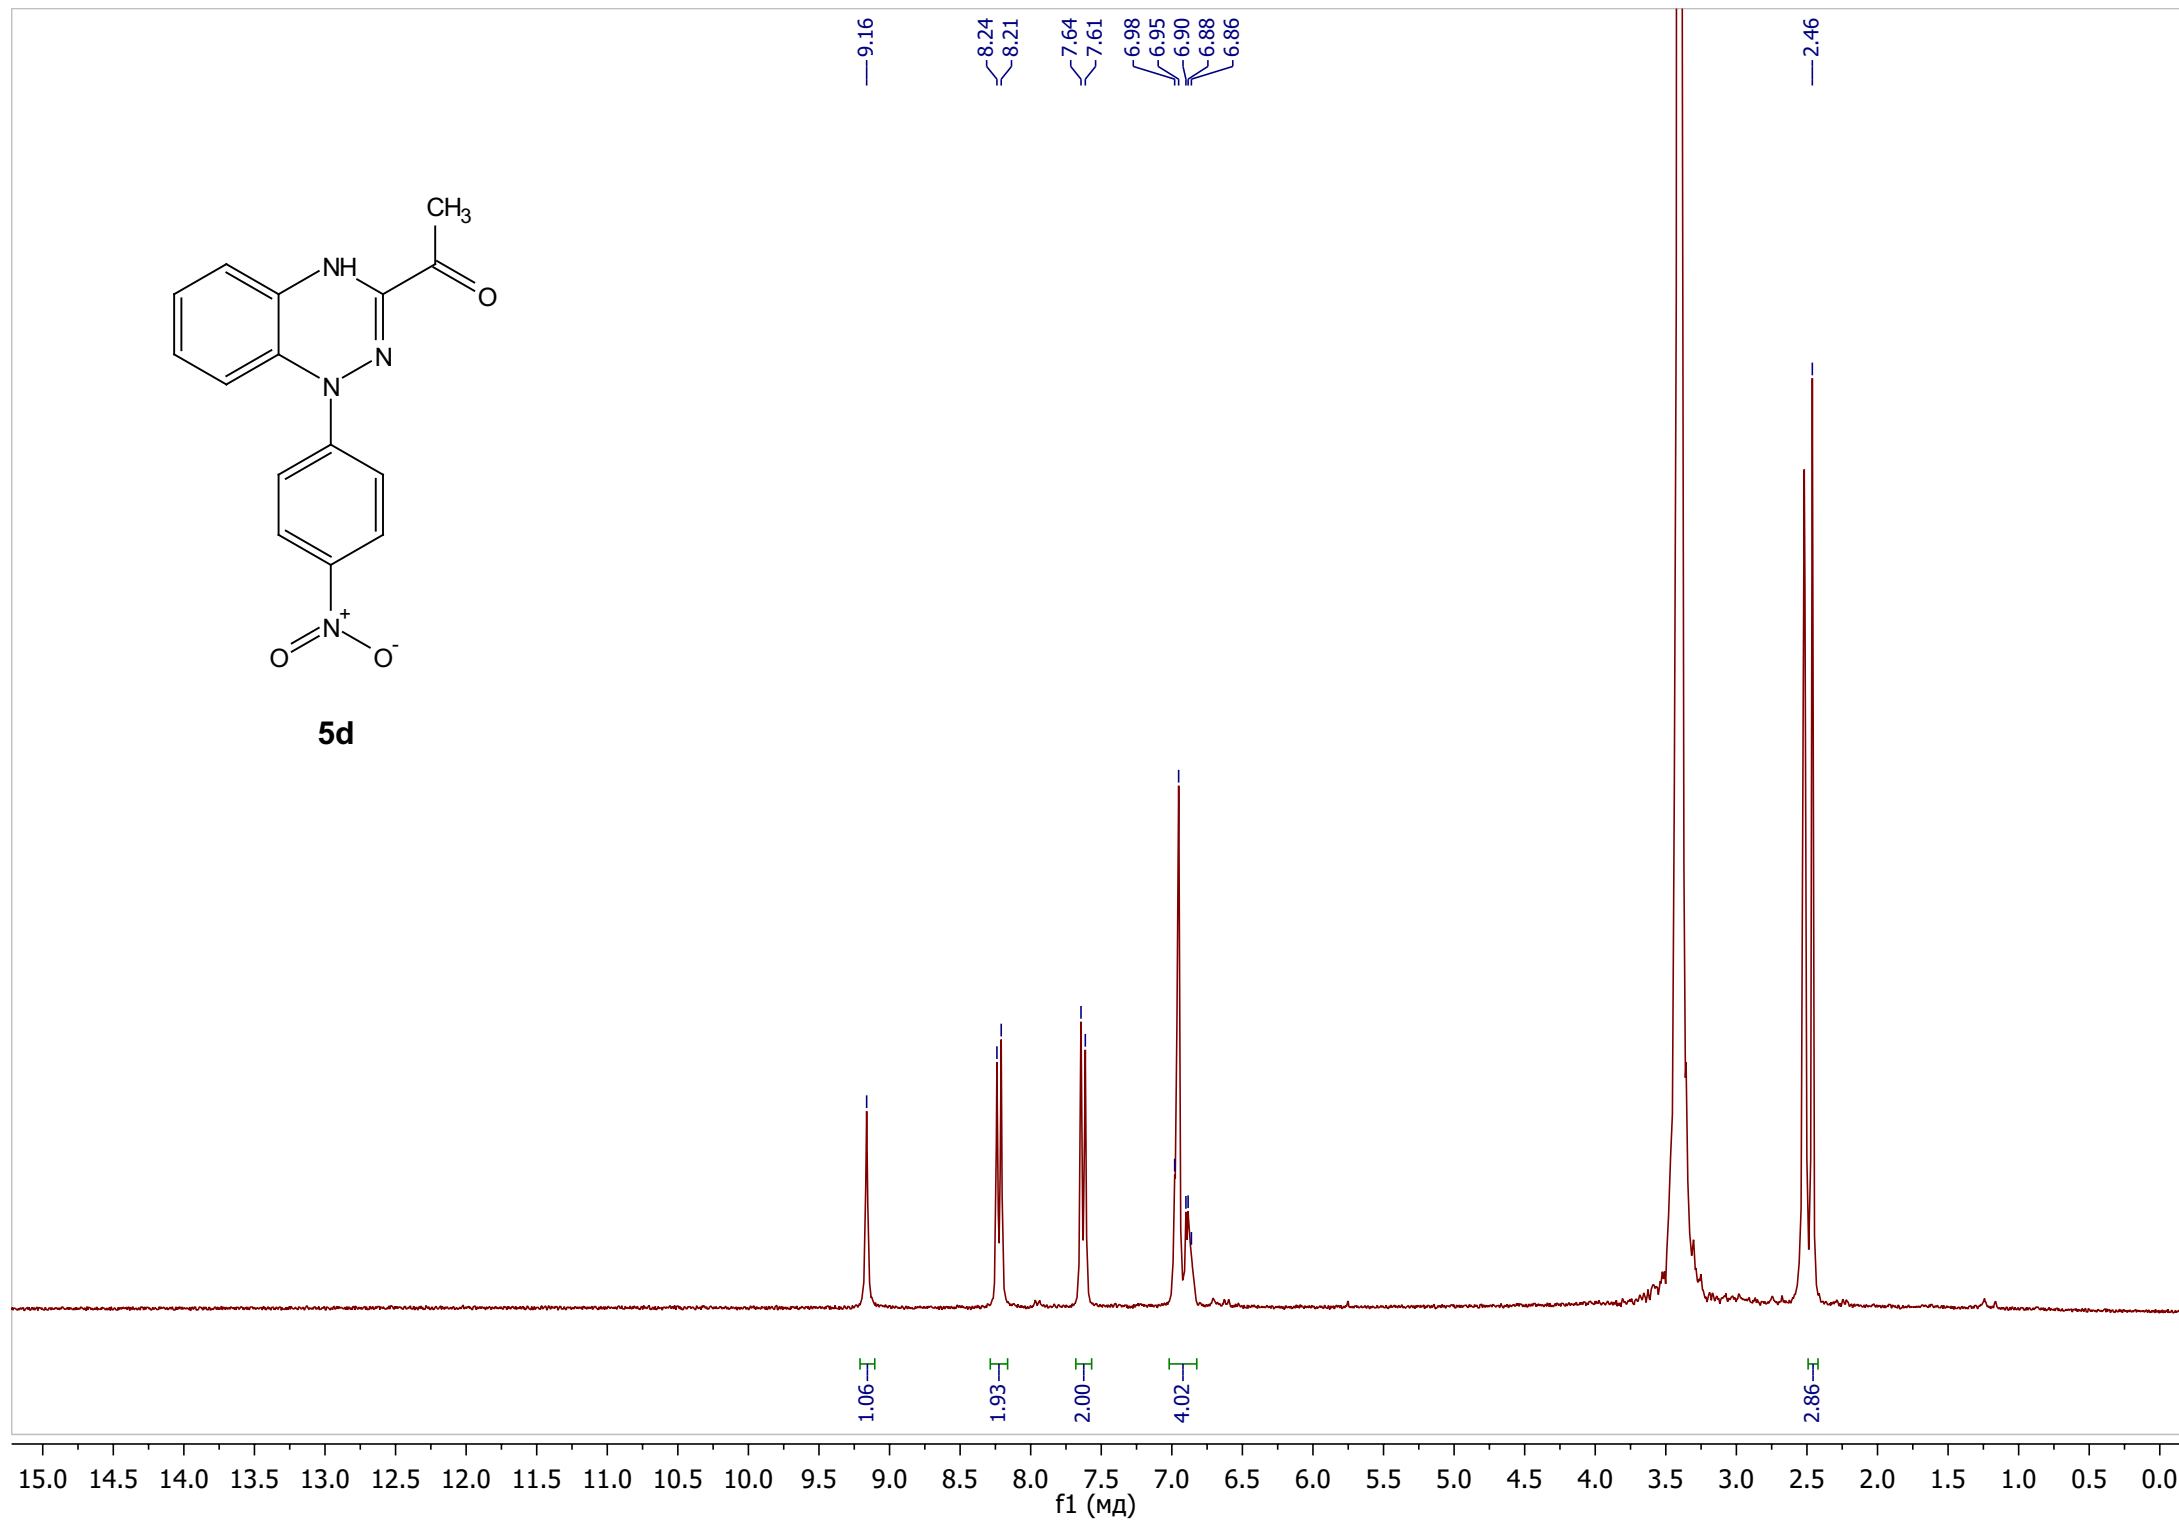

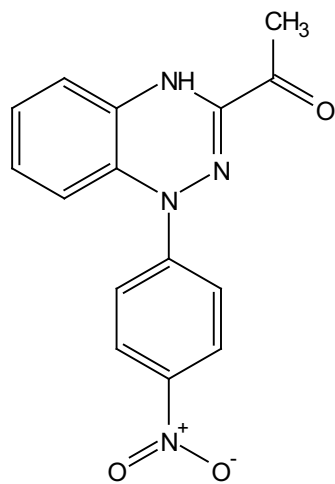

**5d**

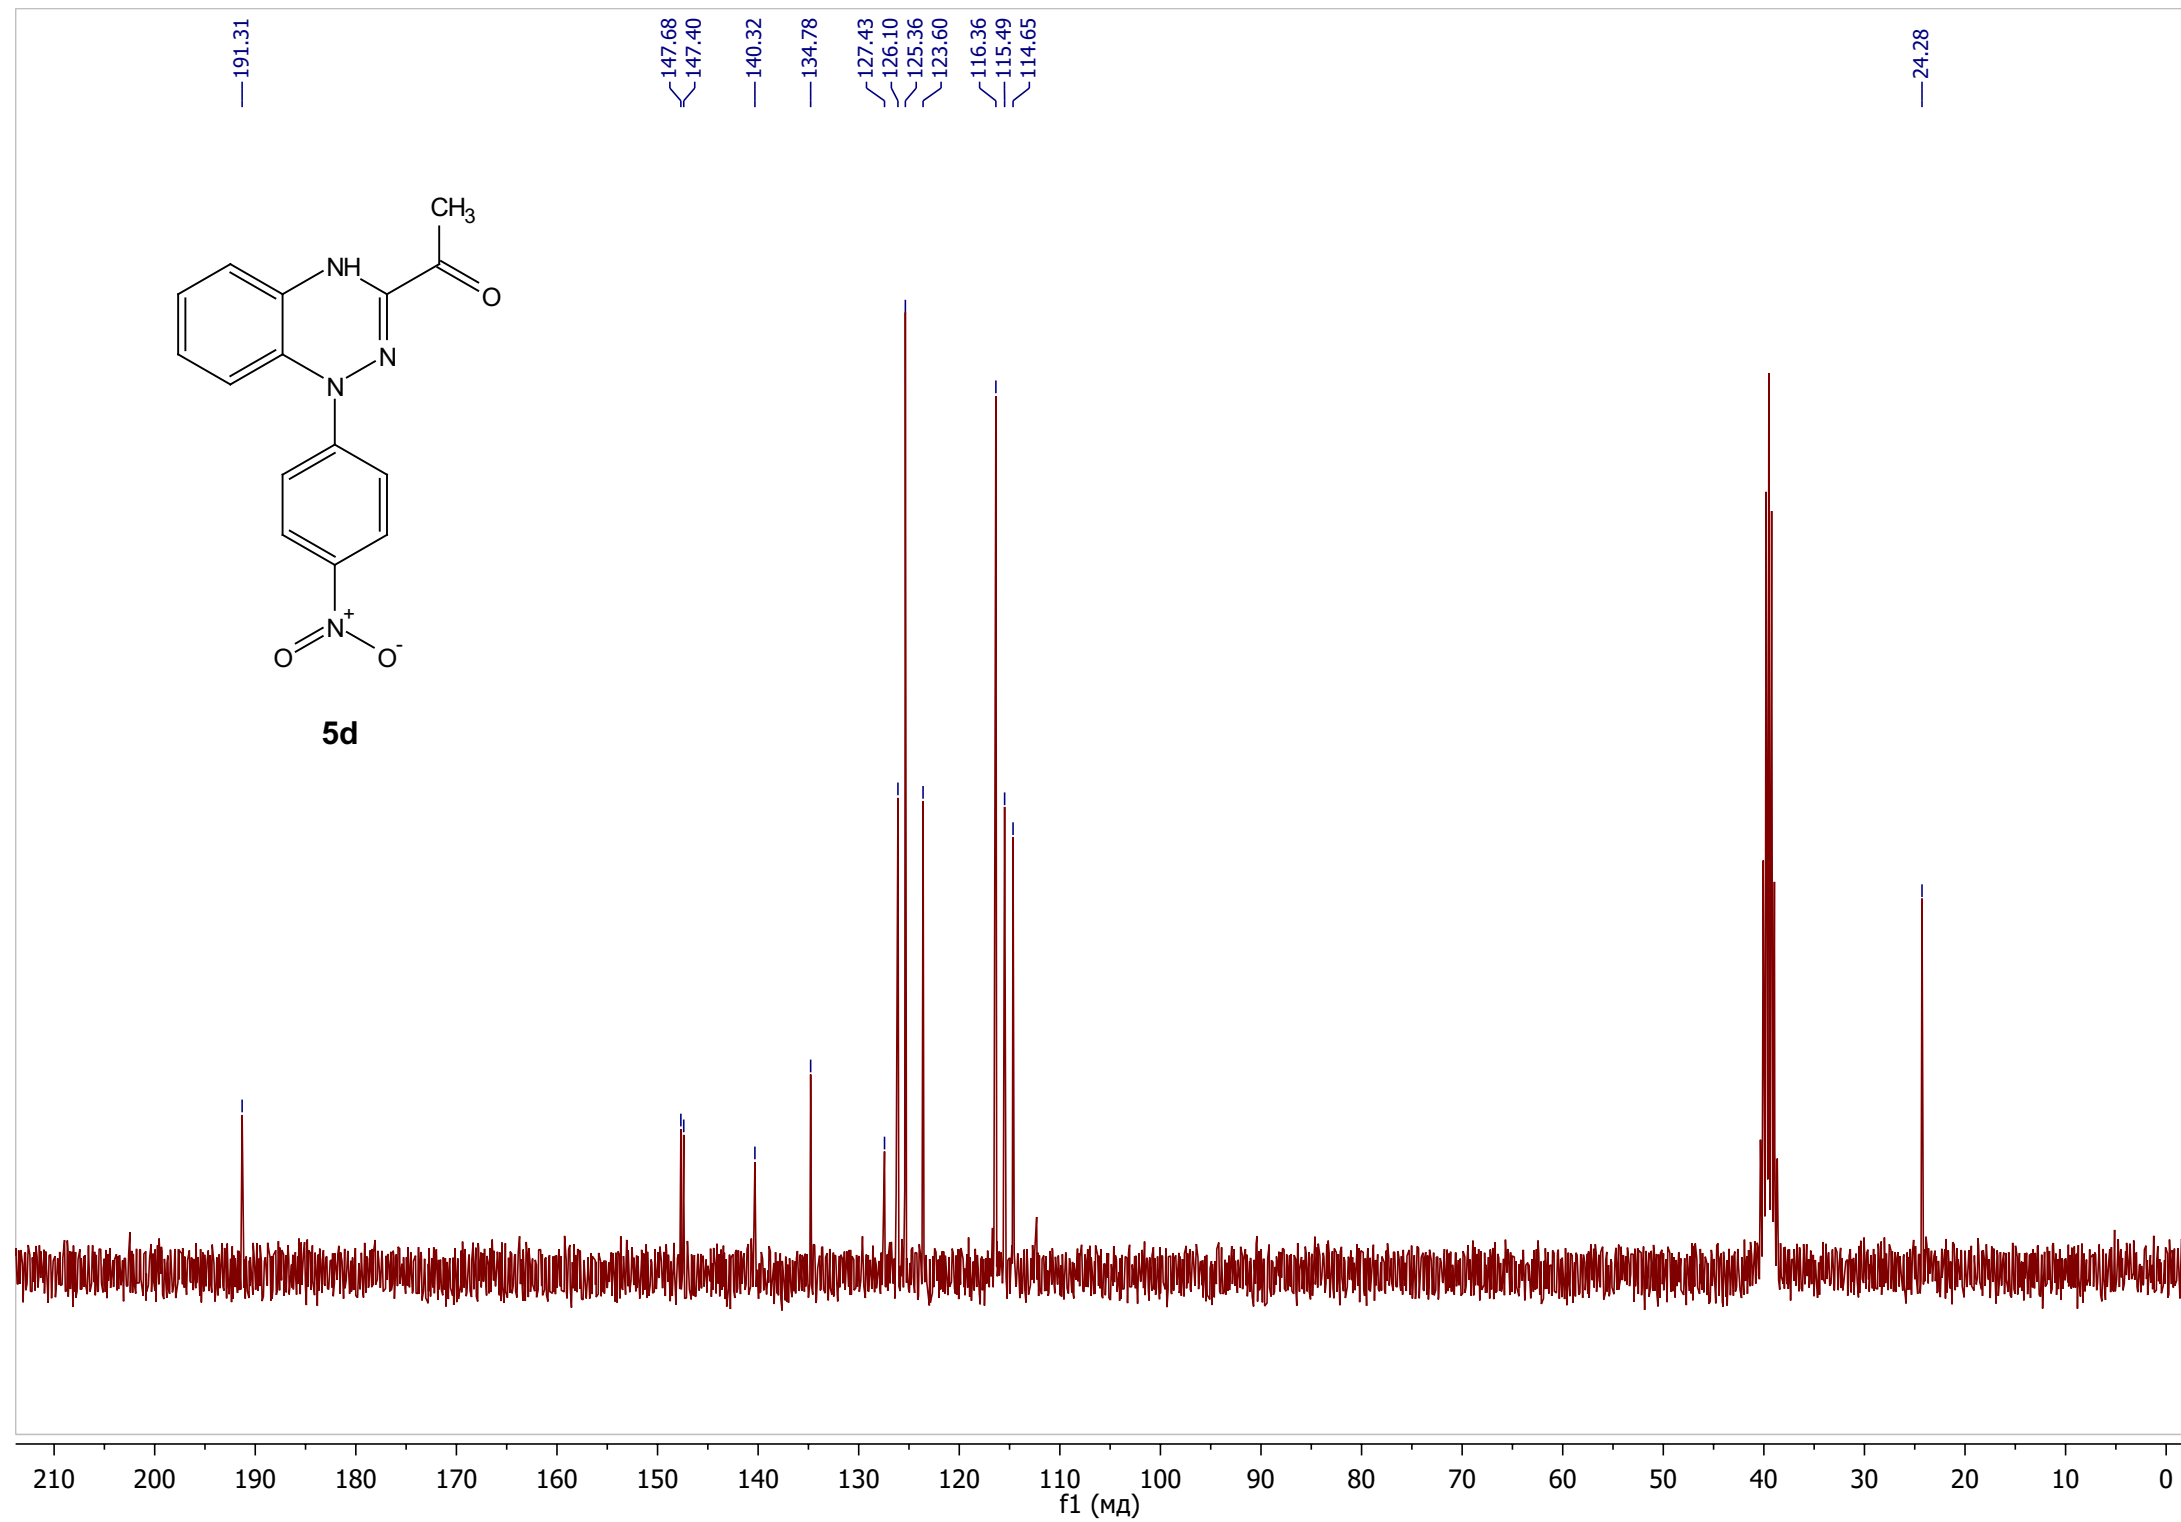



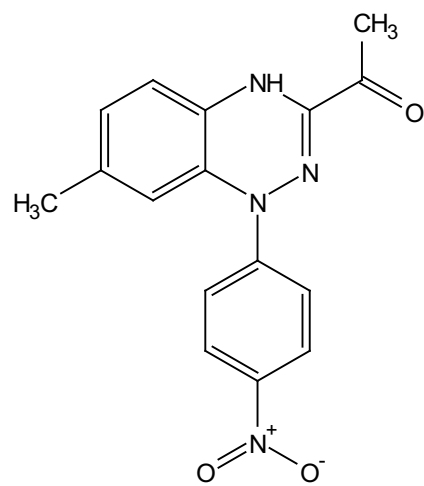

5e

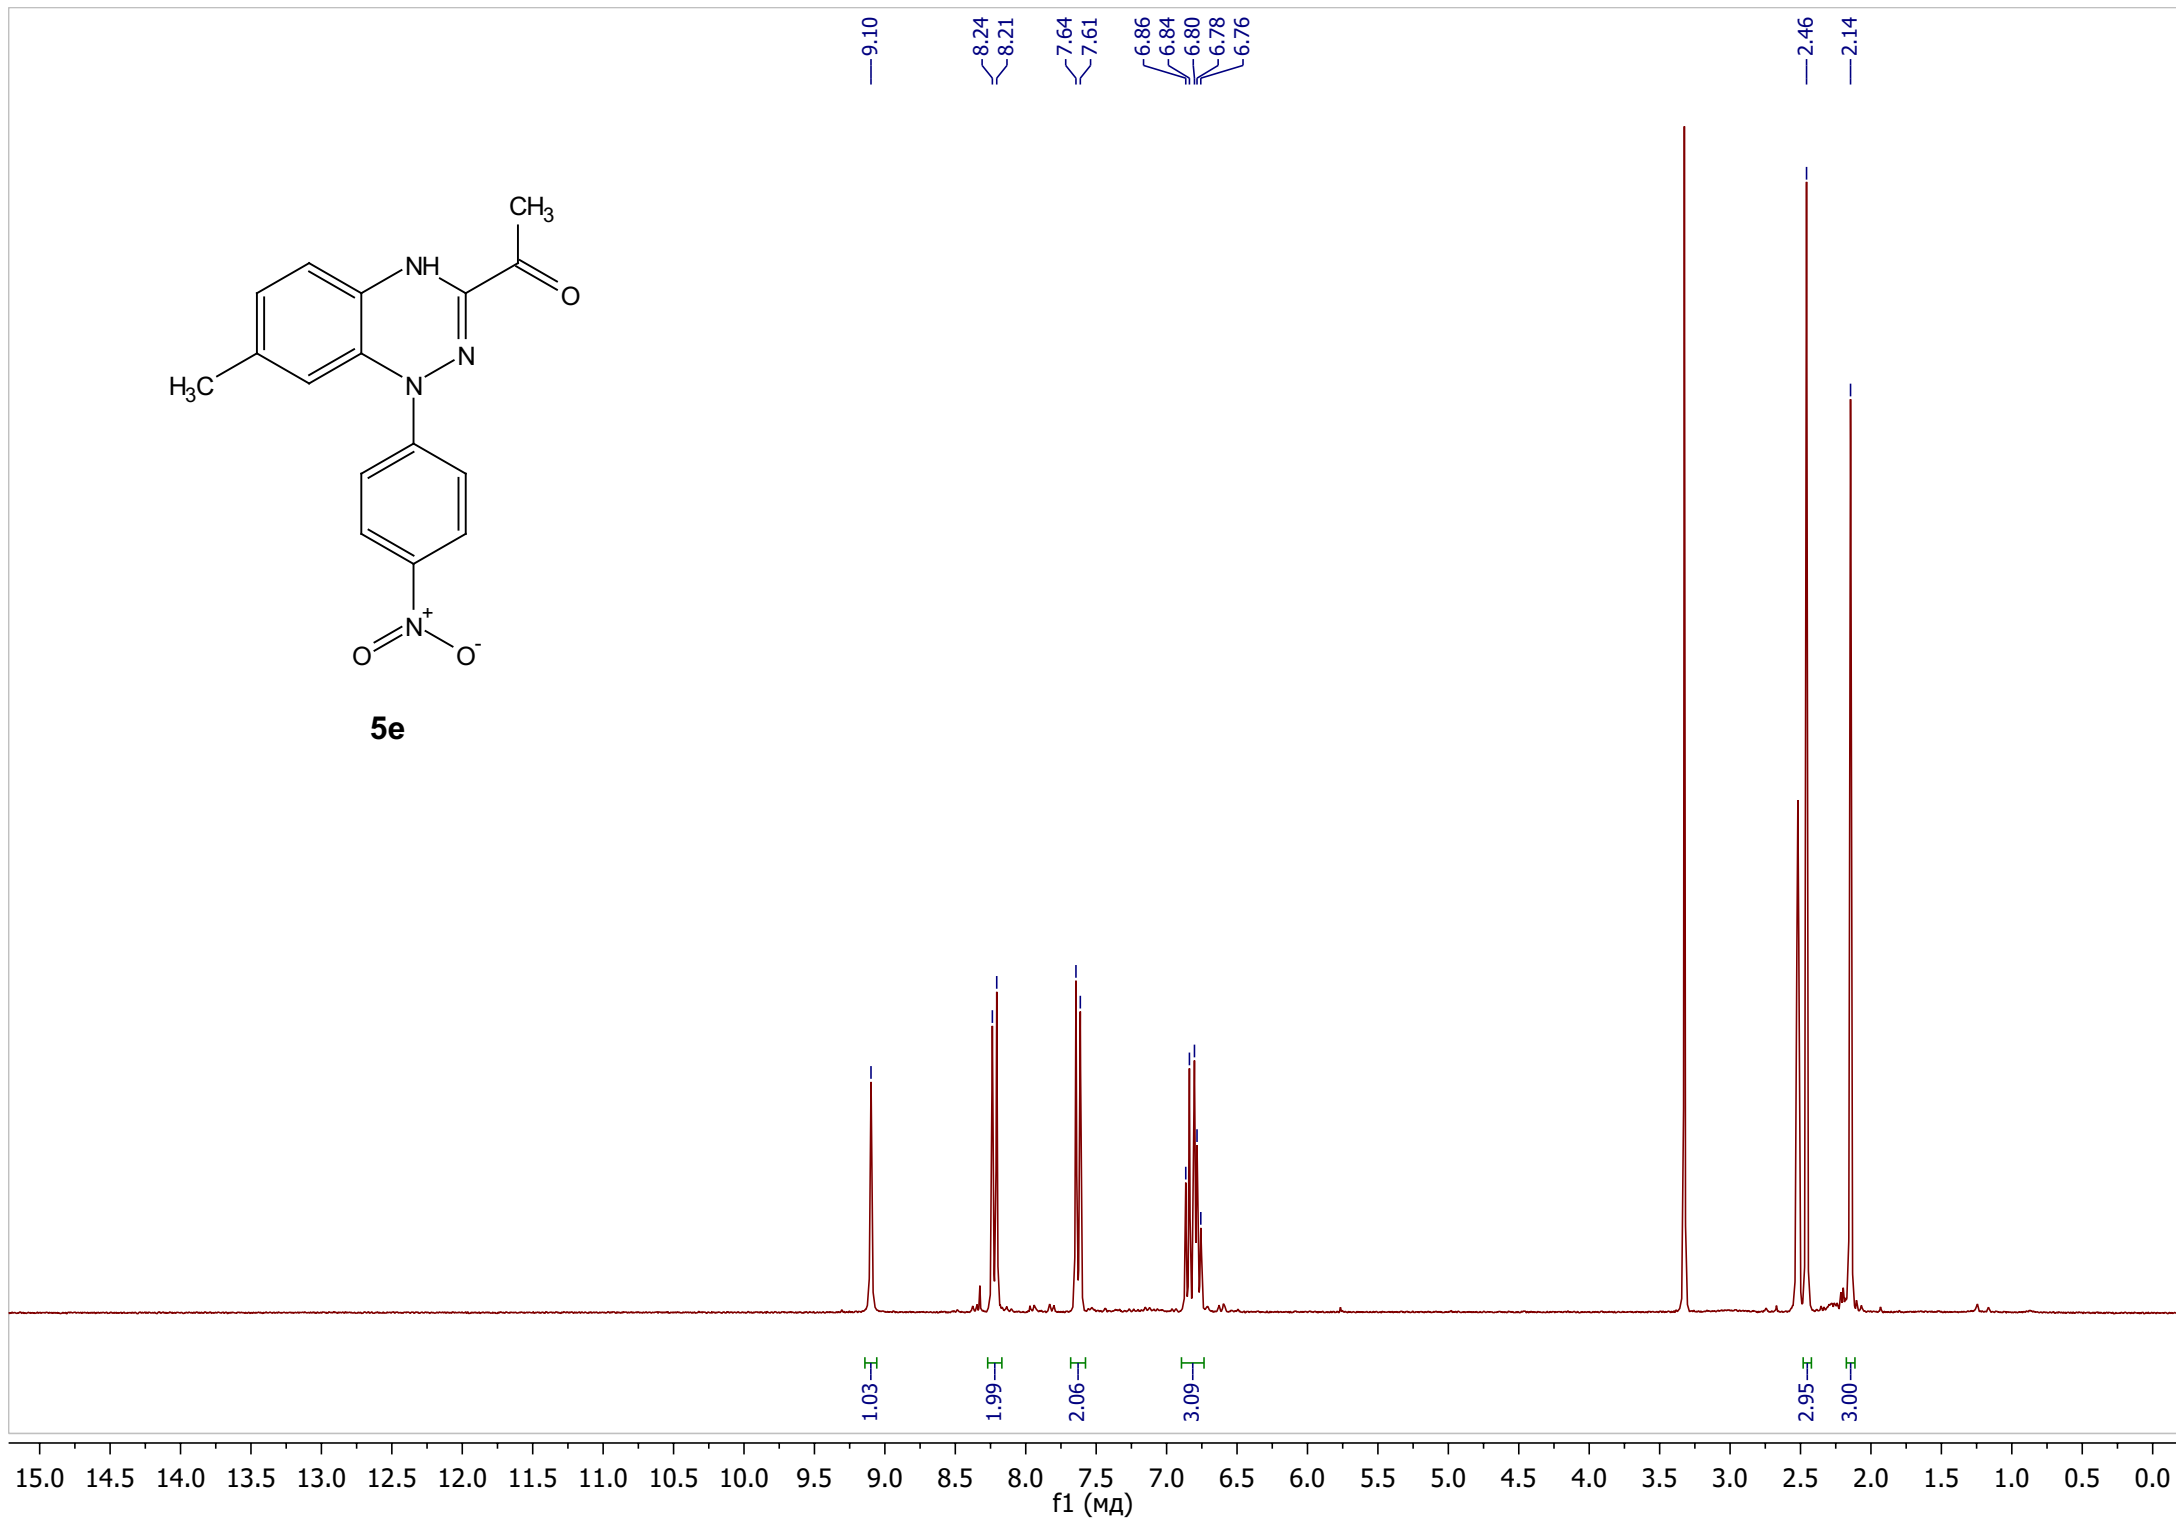



**5e**

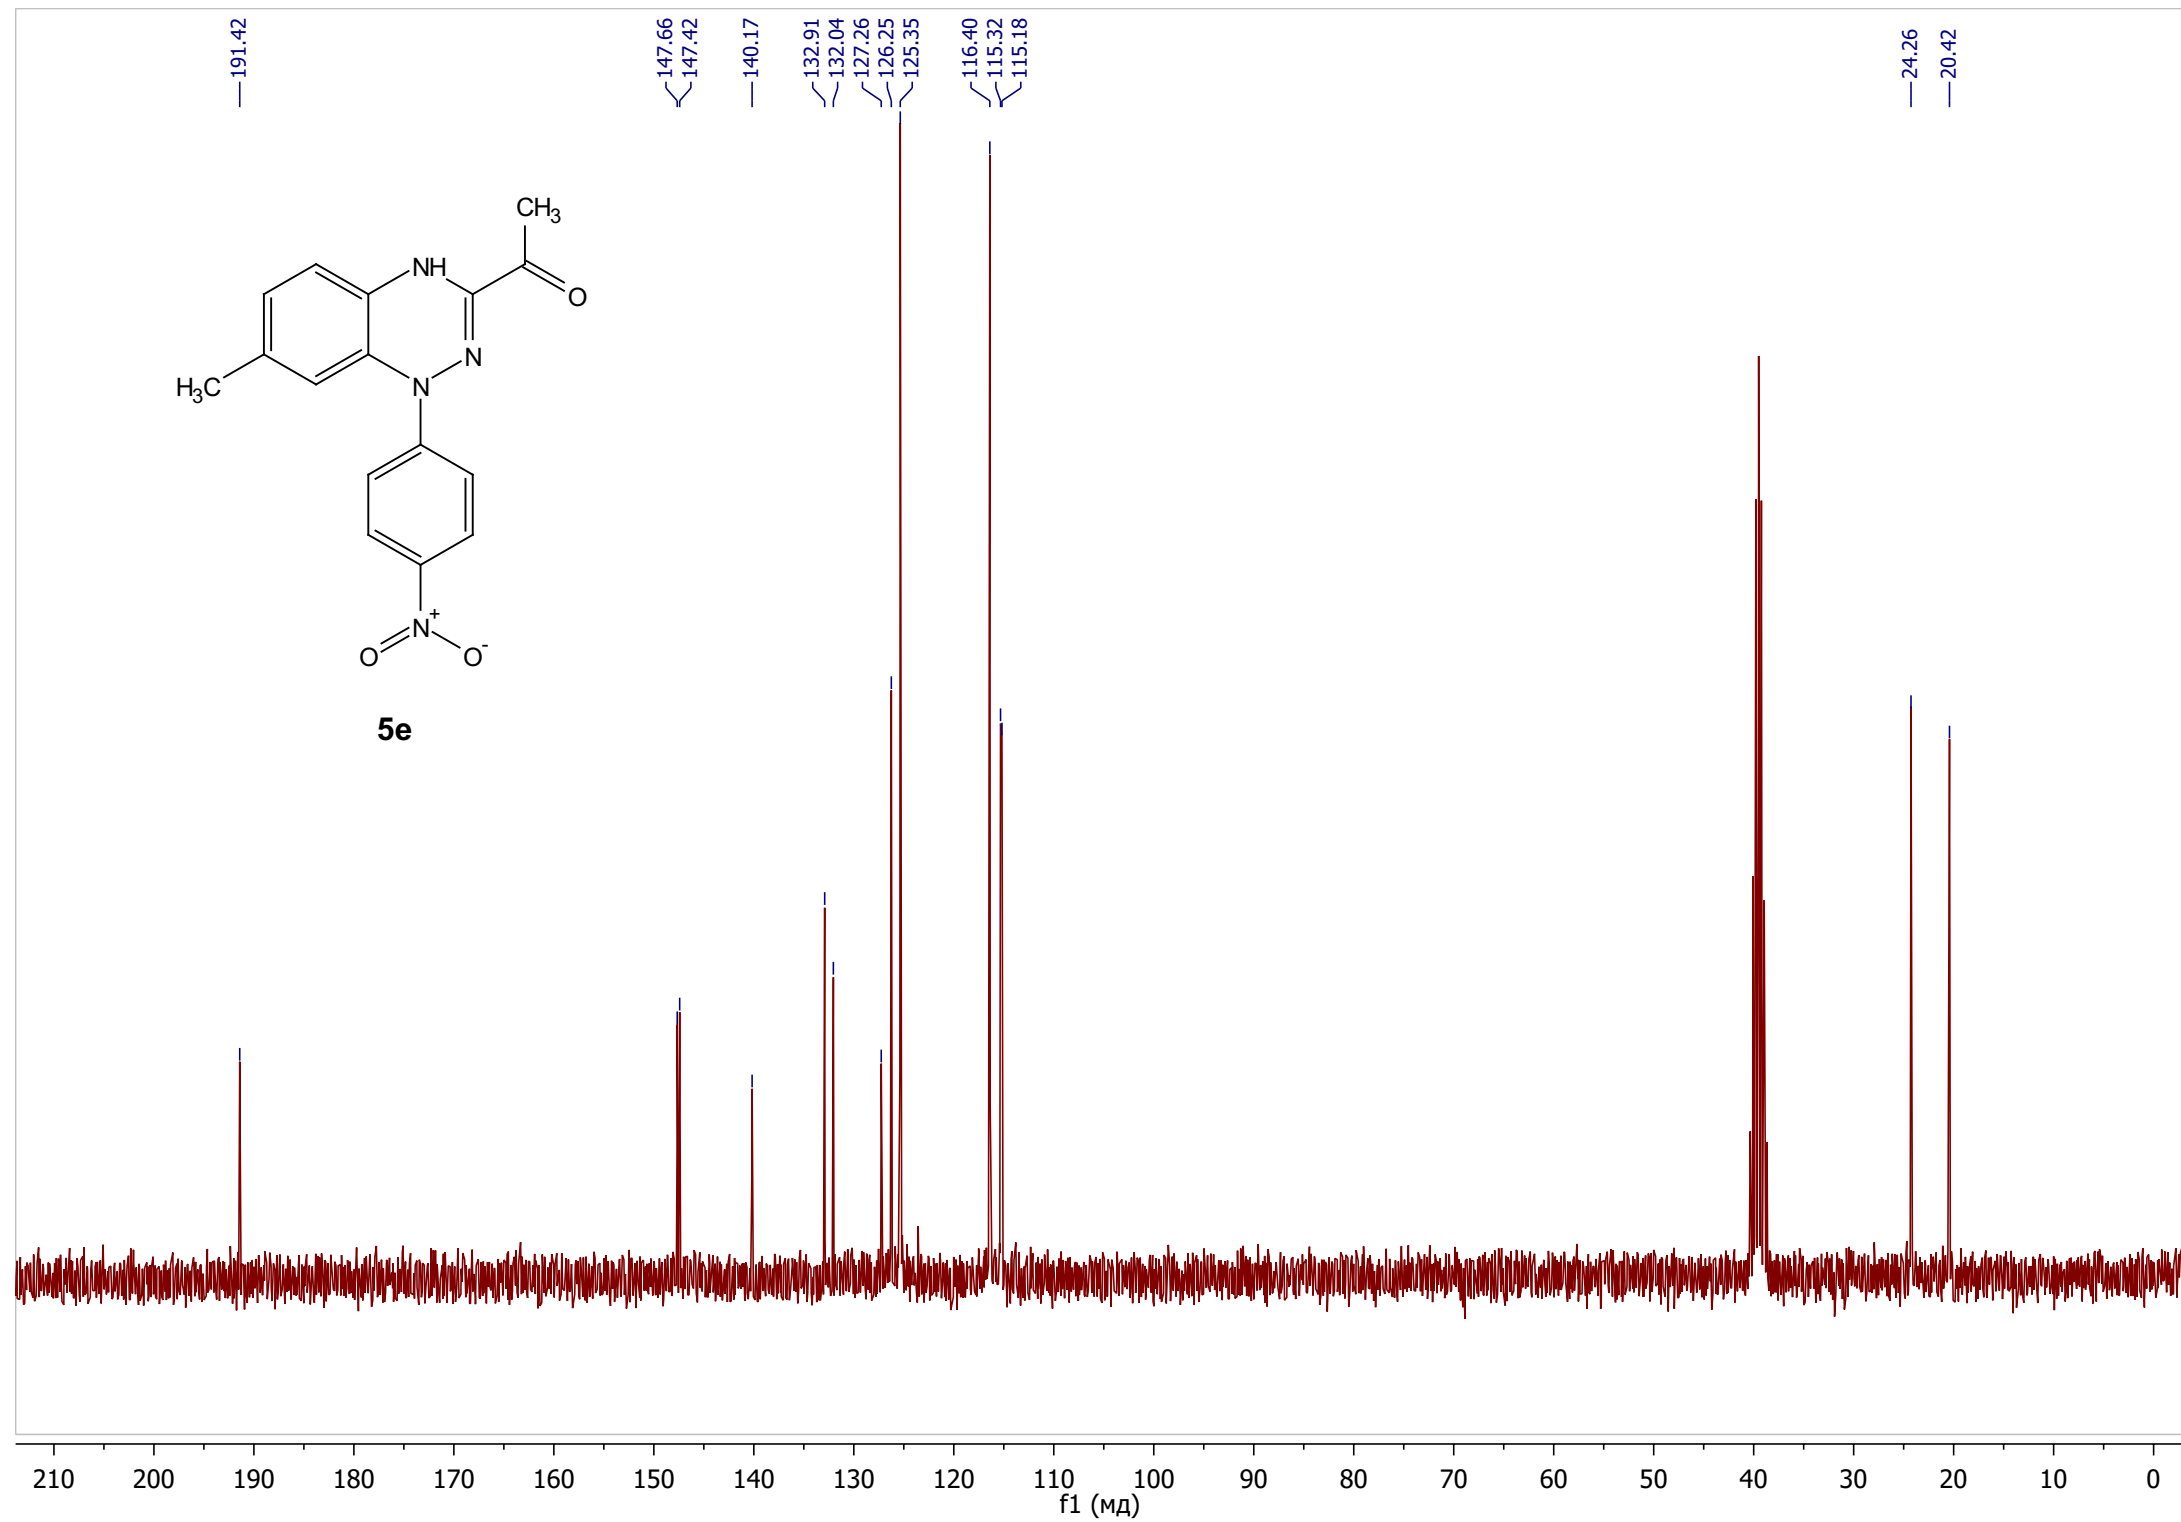

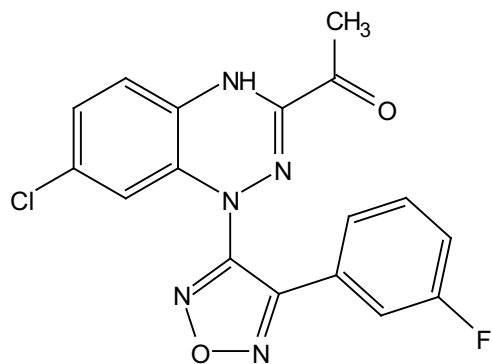

**5f**

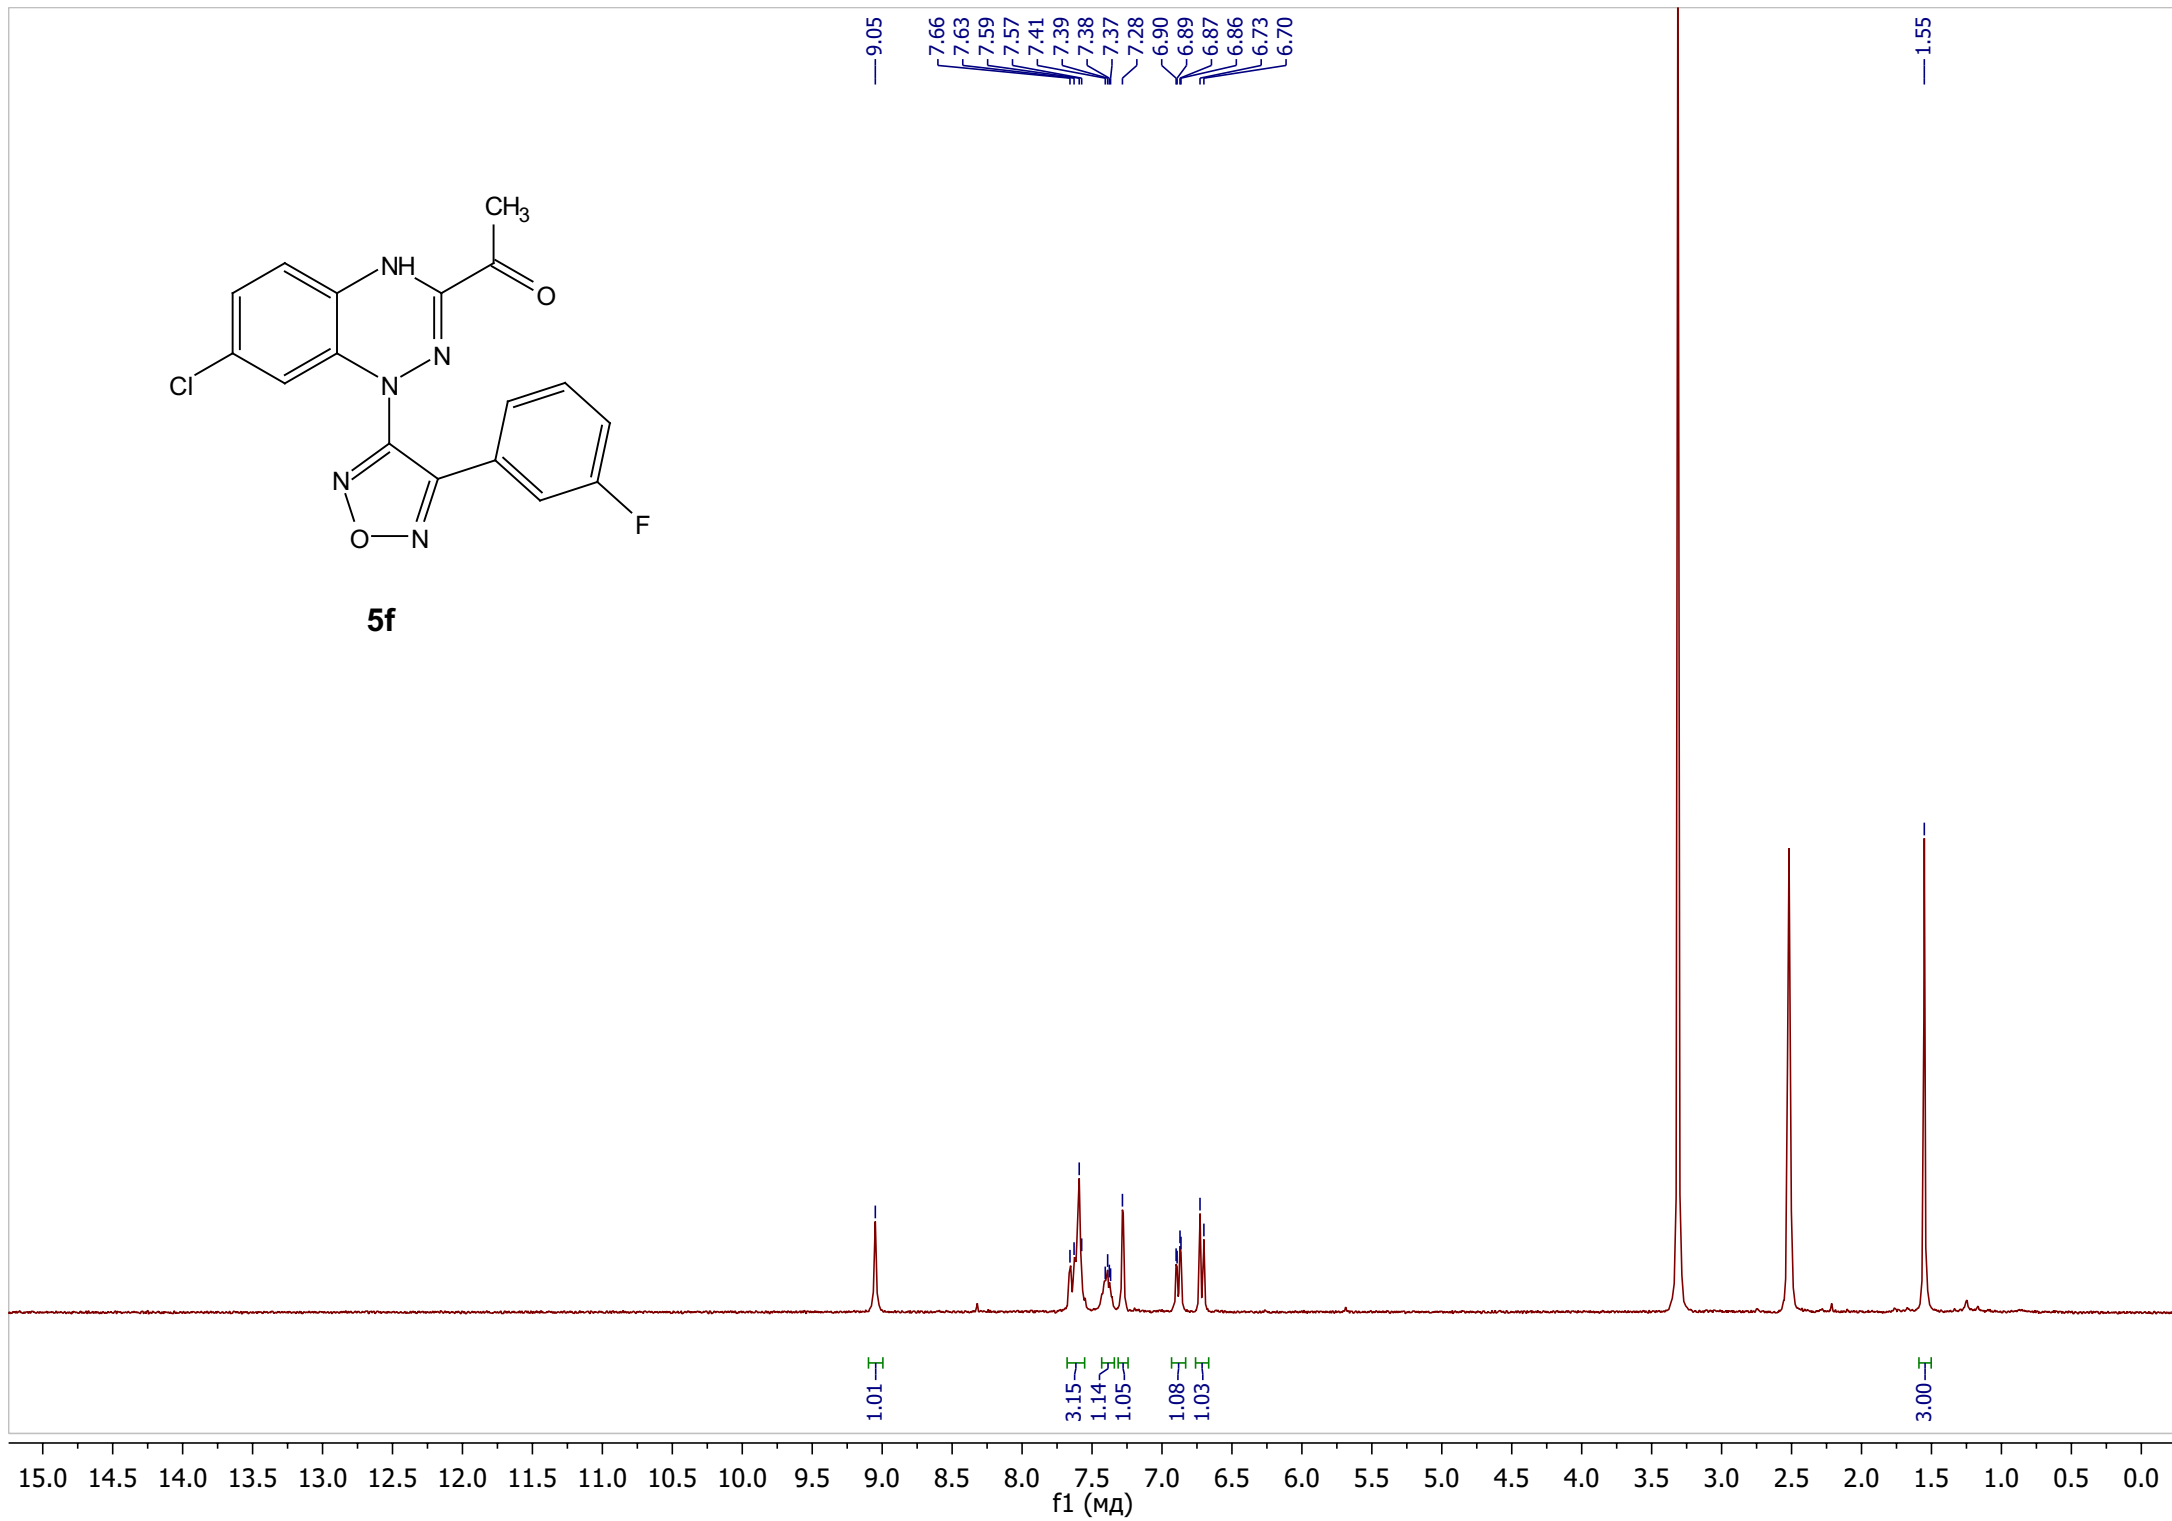

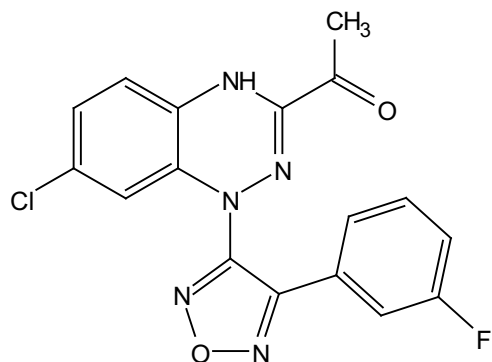

**5f**

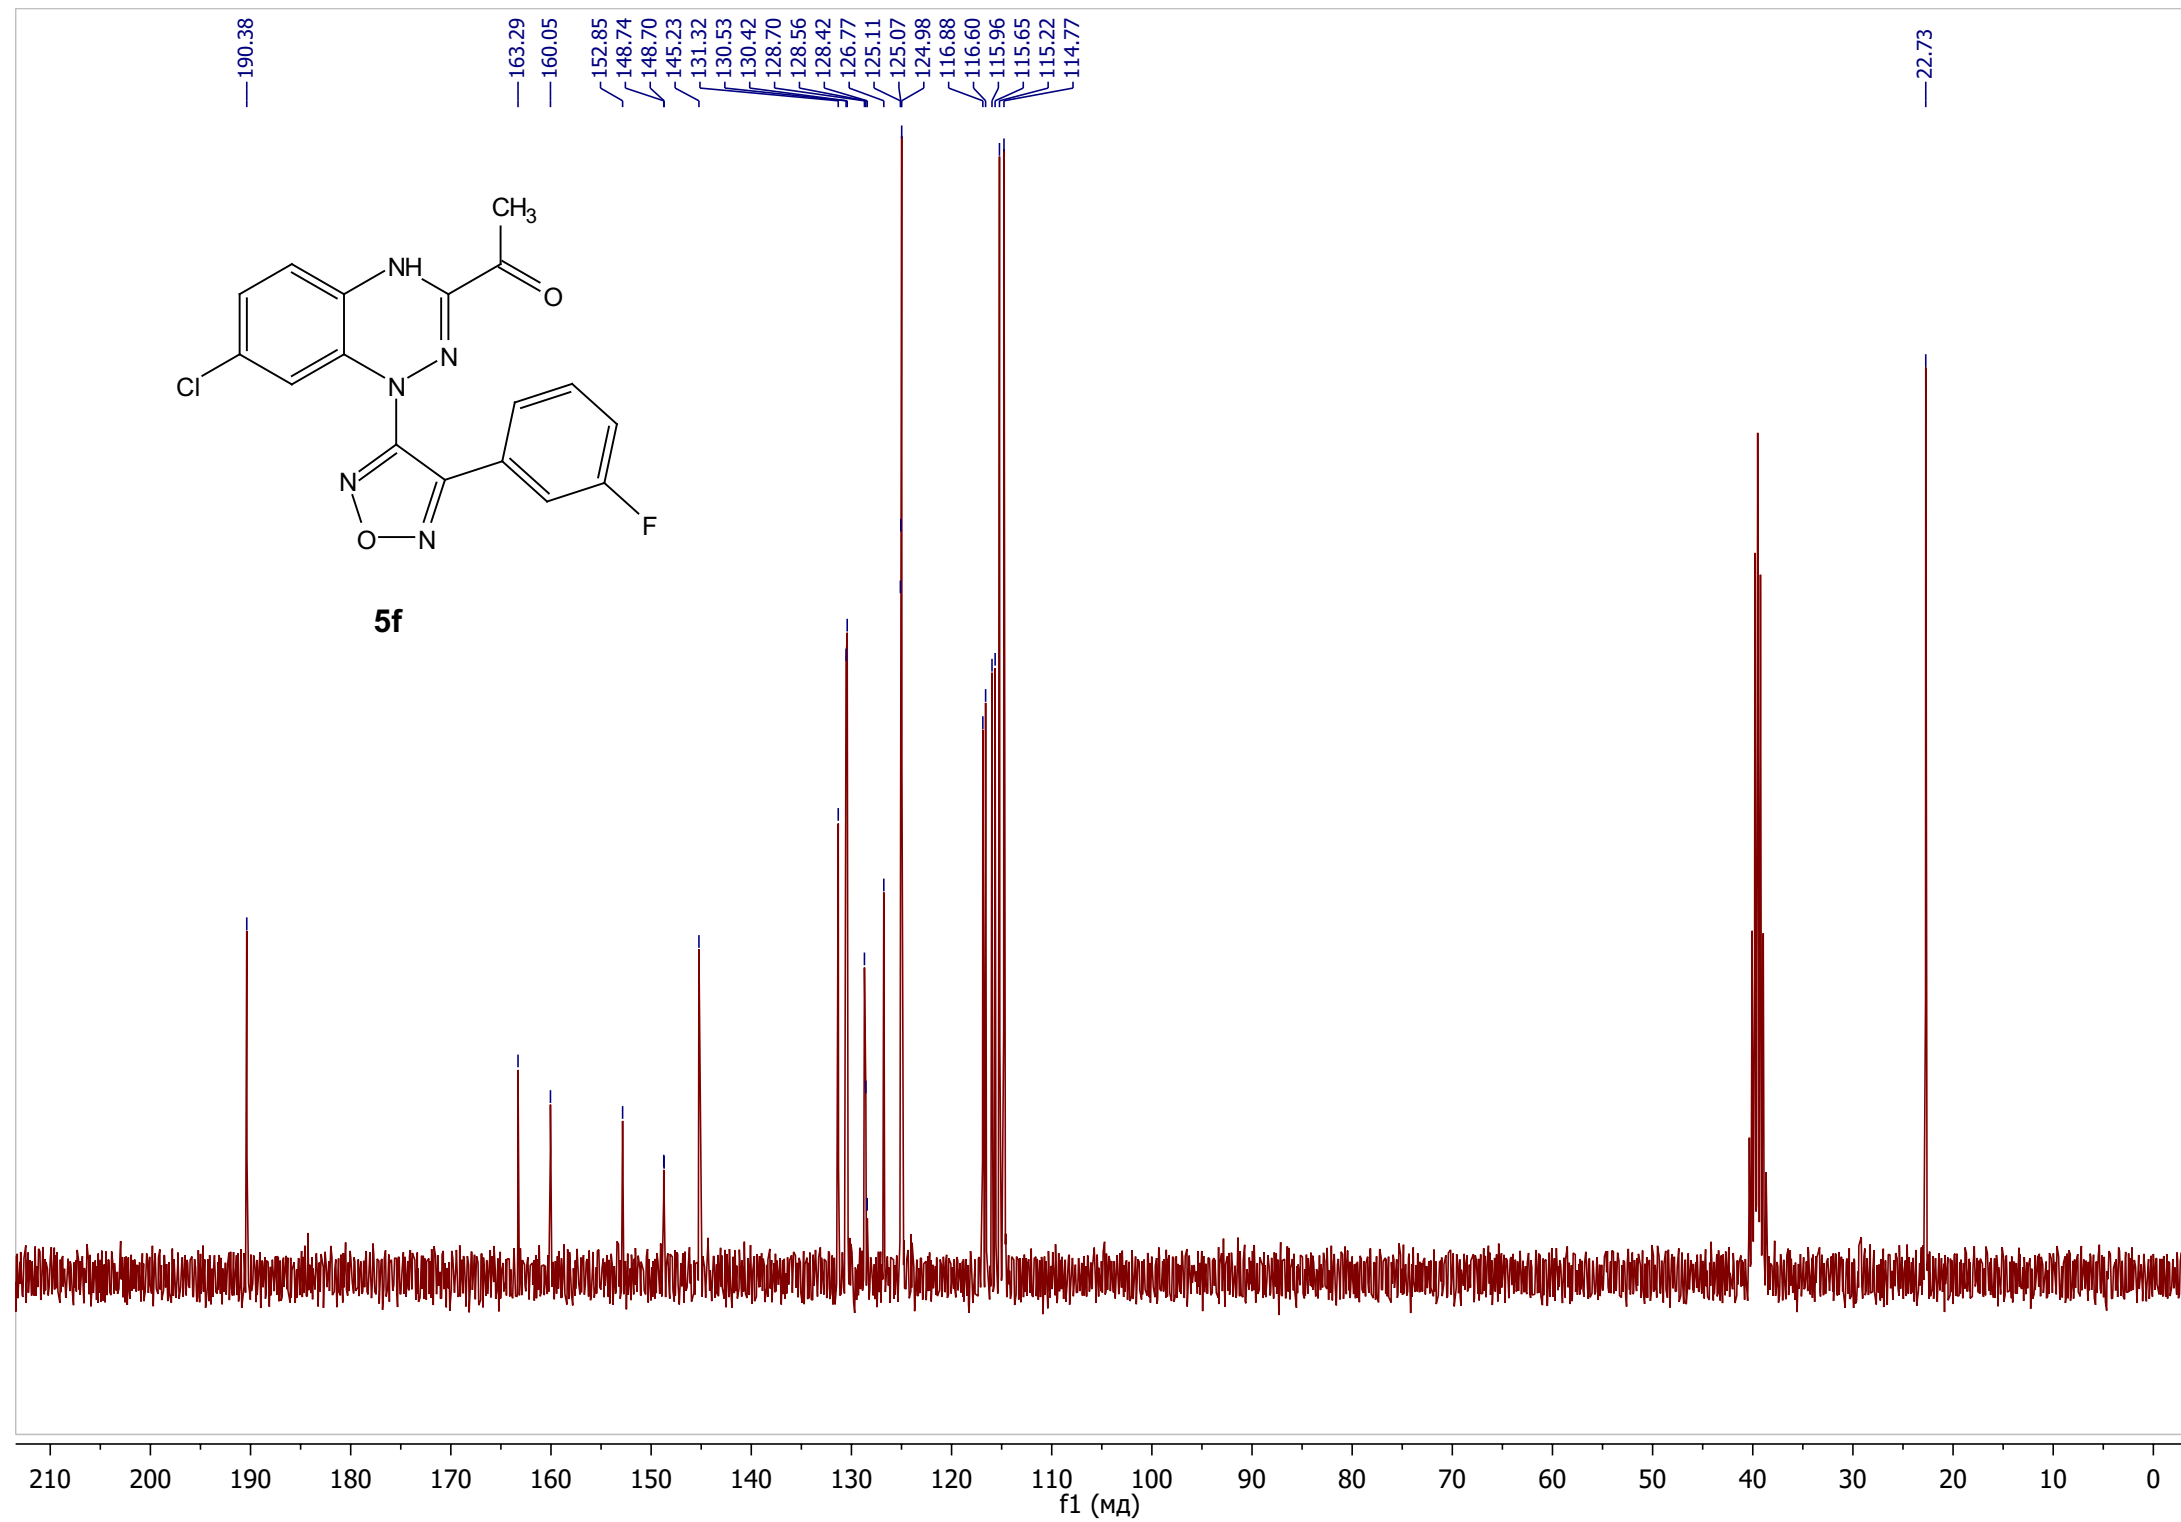

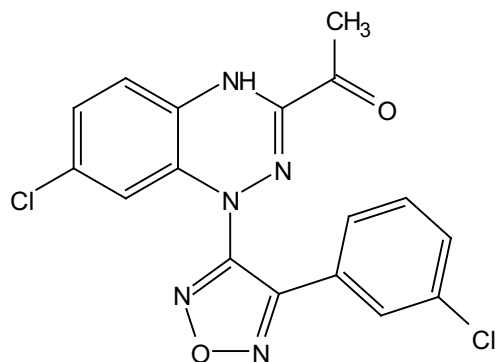

**5g**

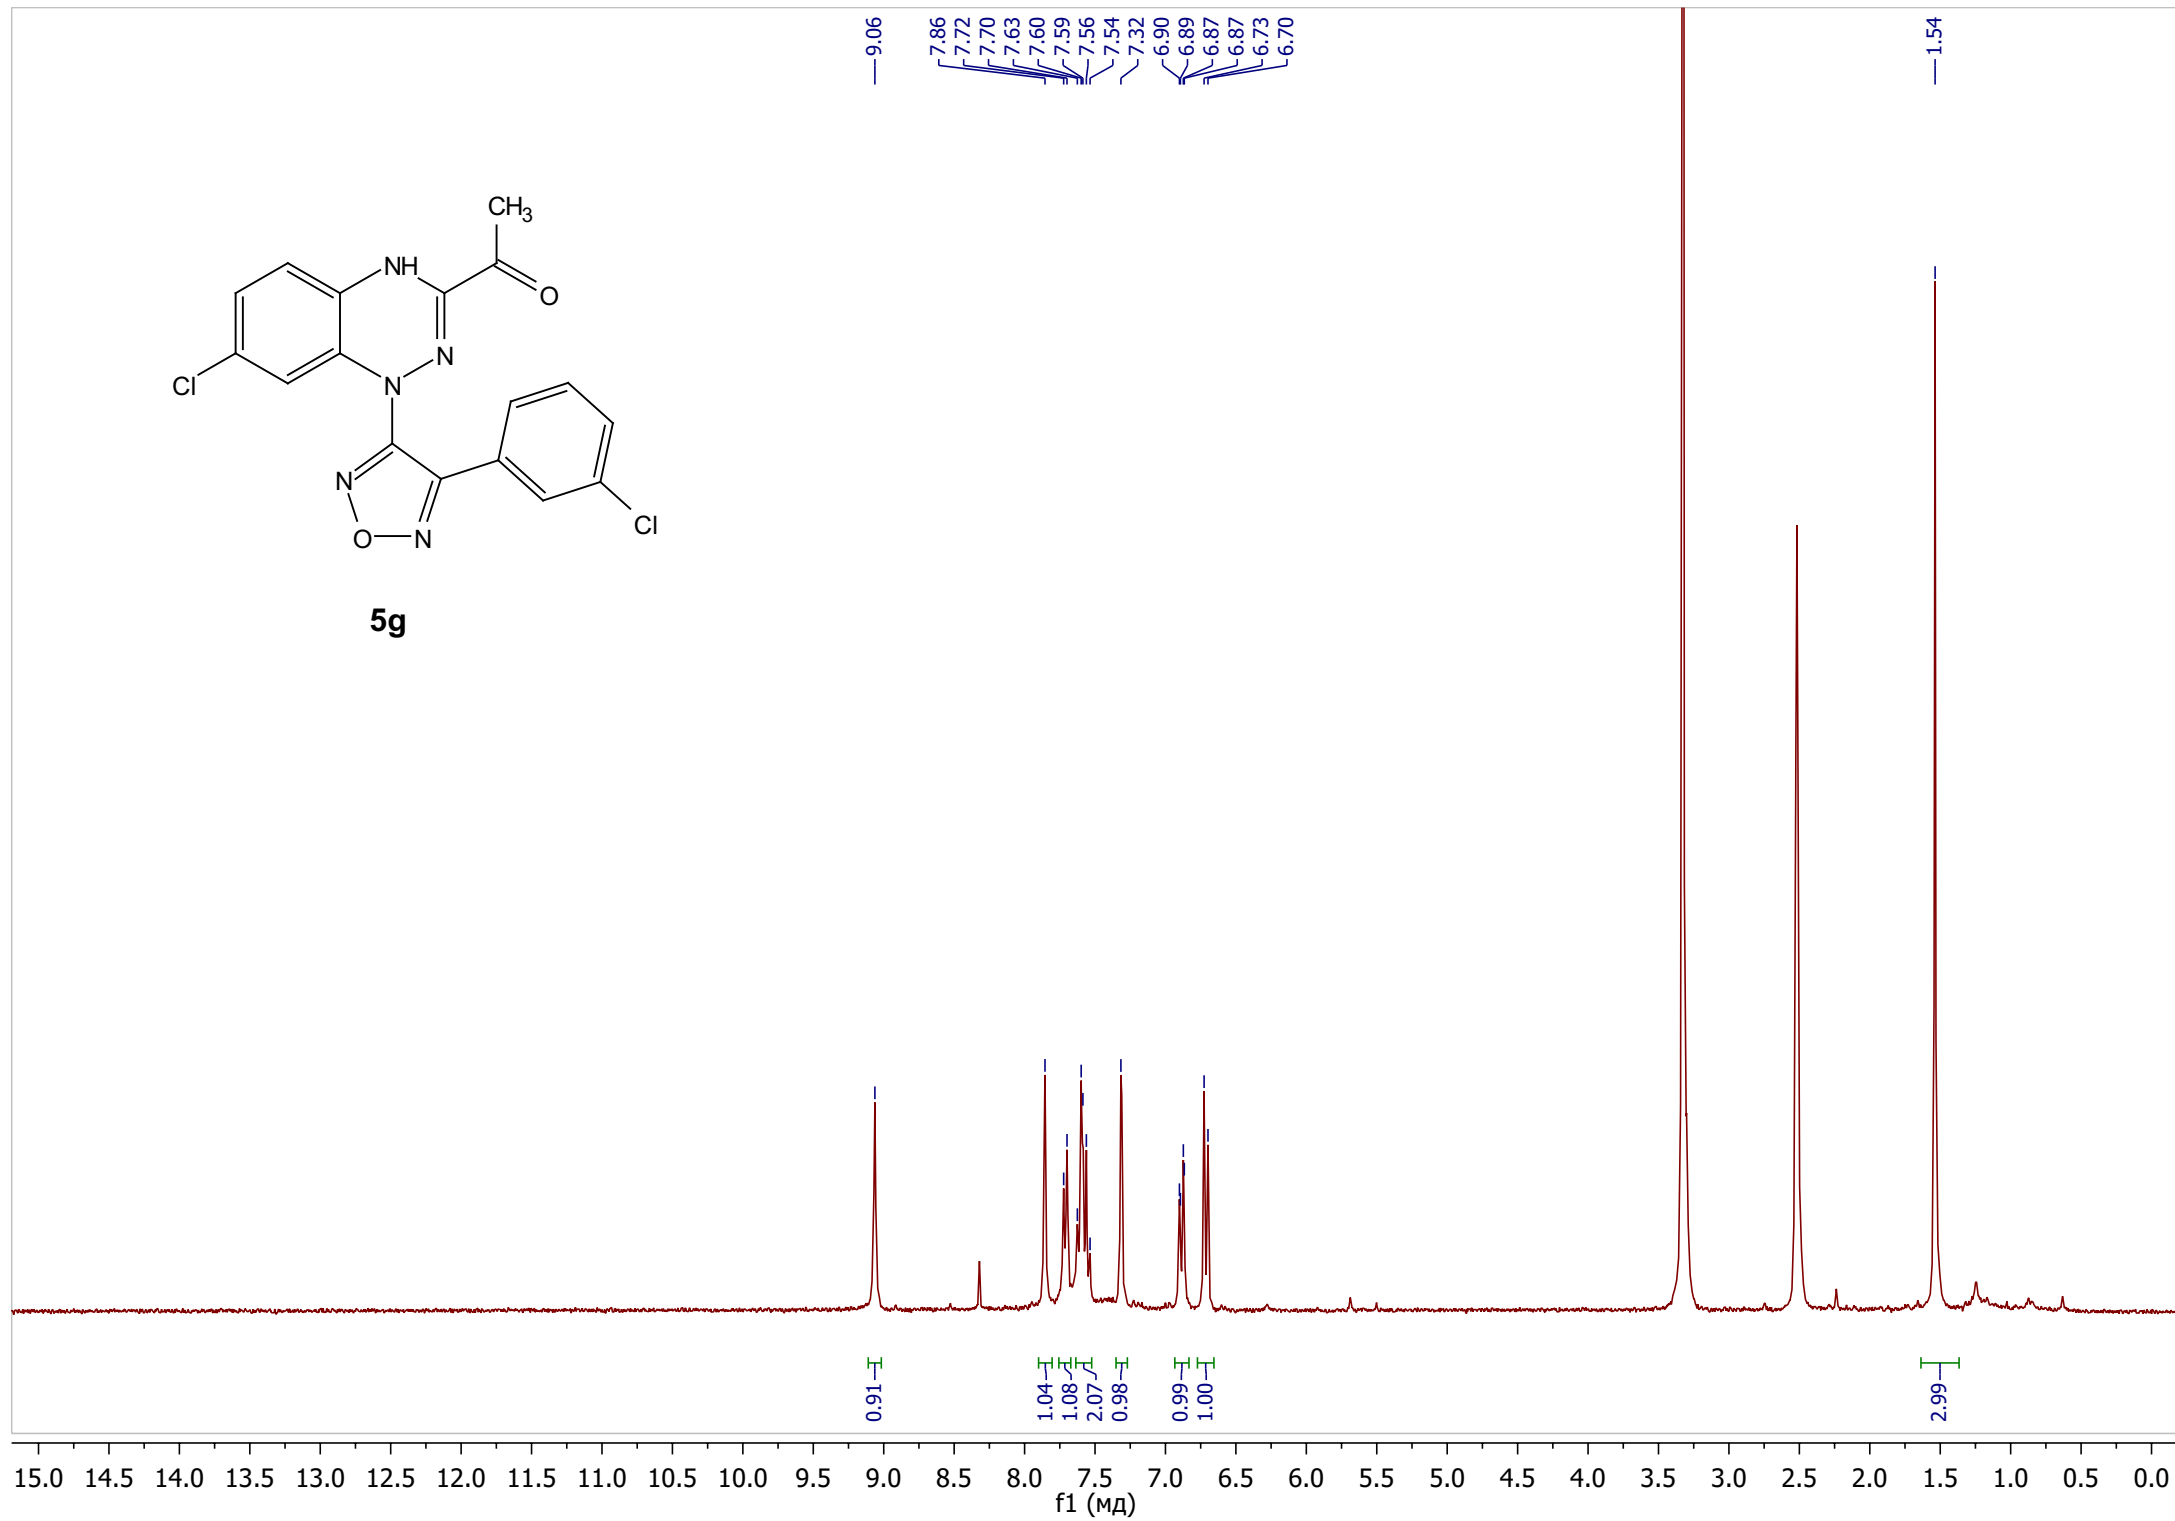



**5g**

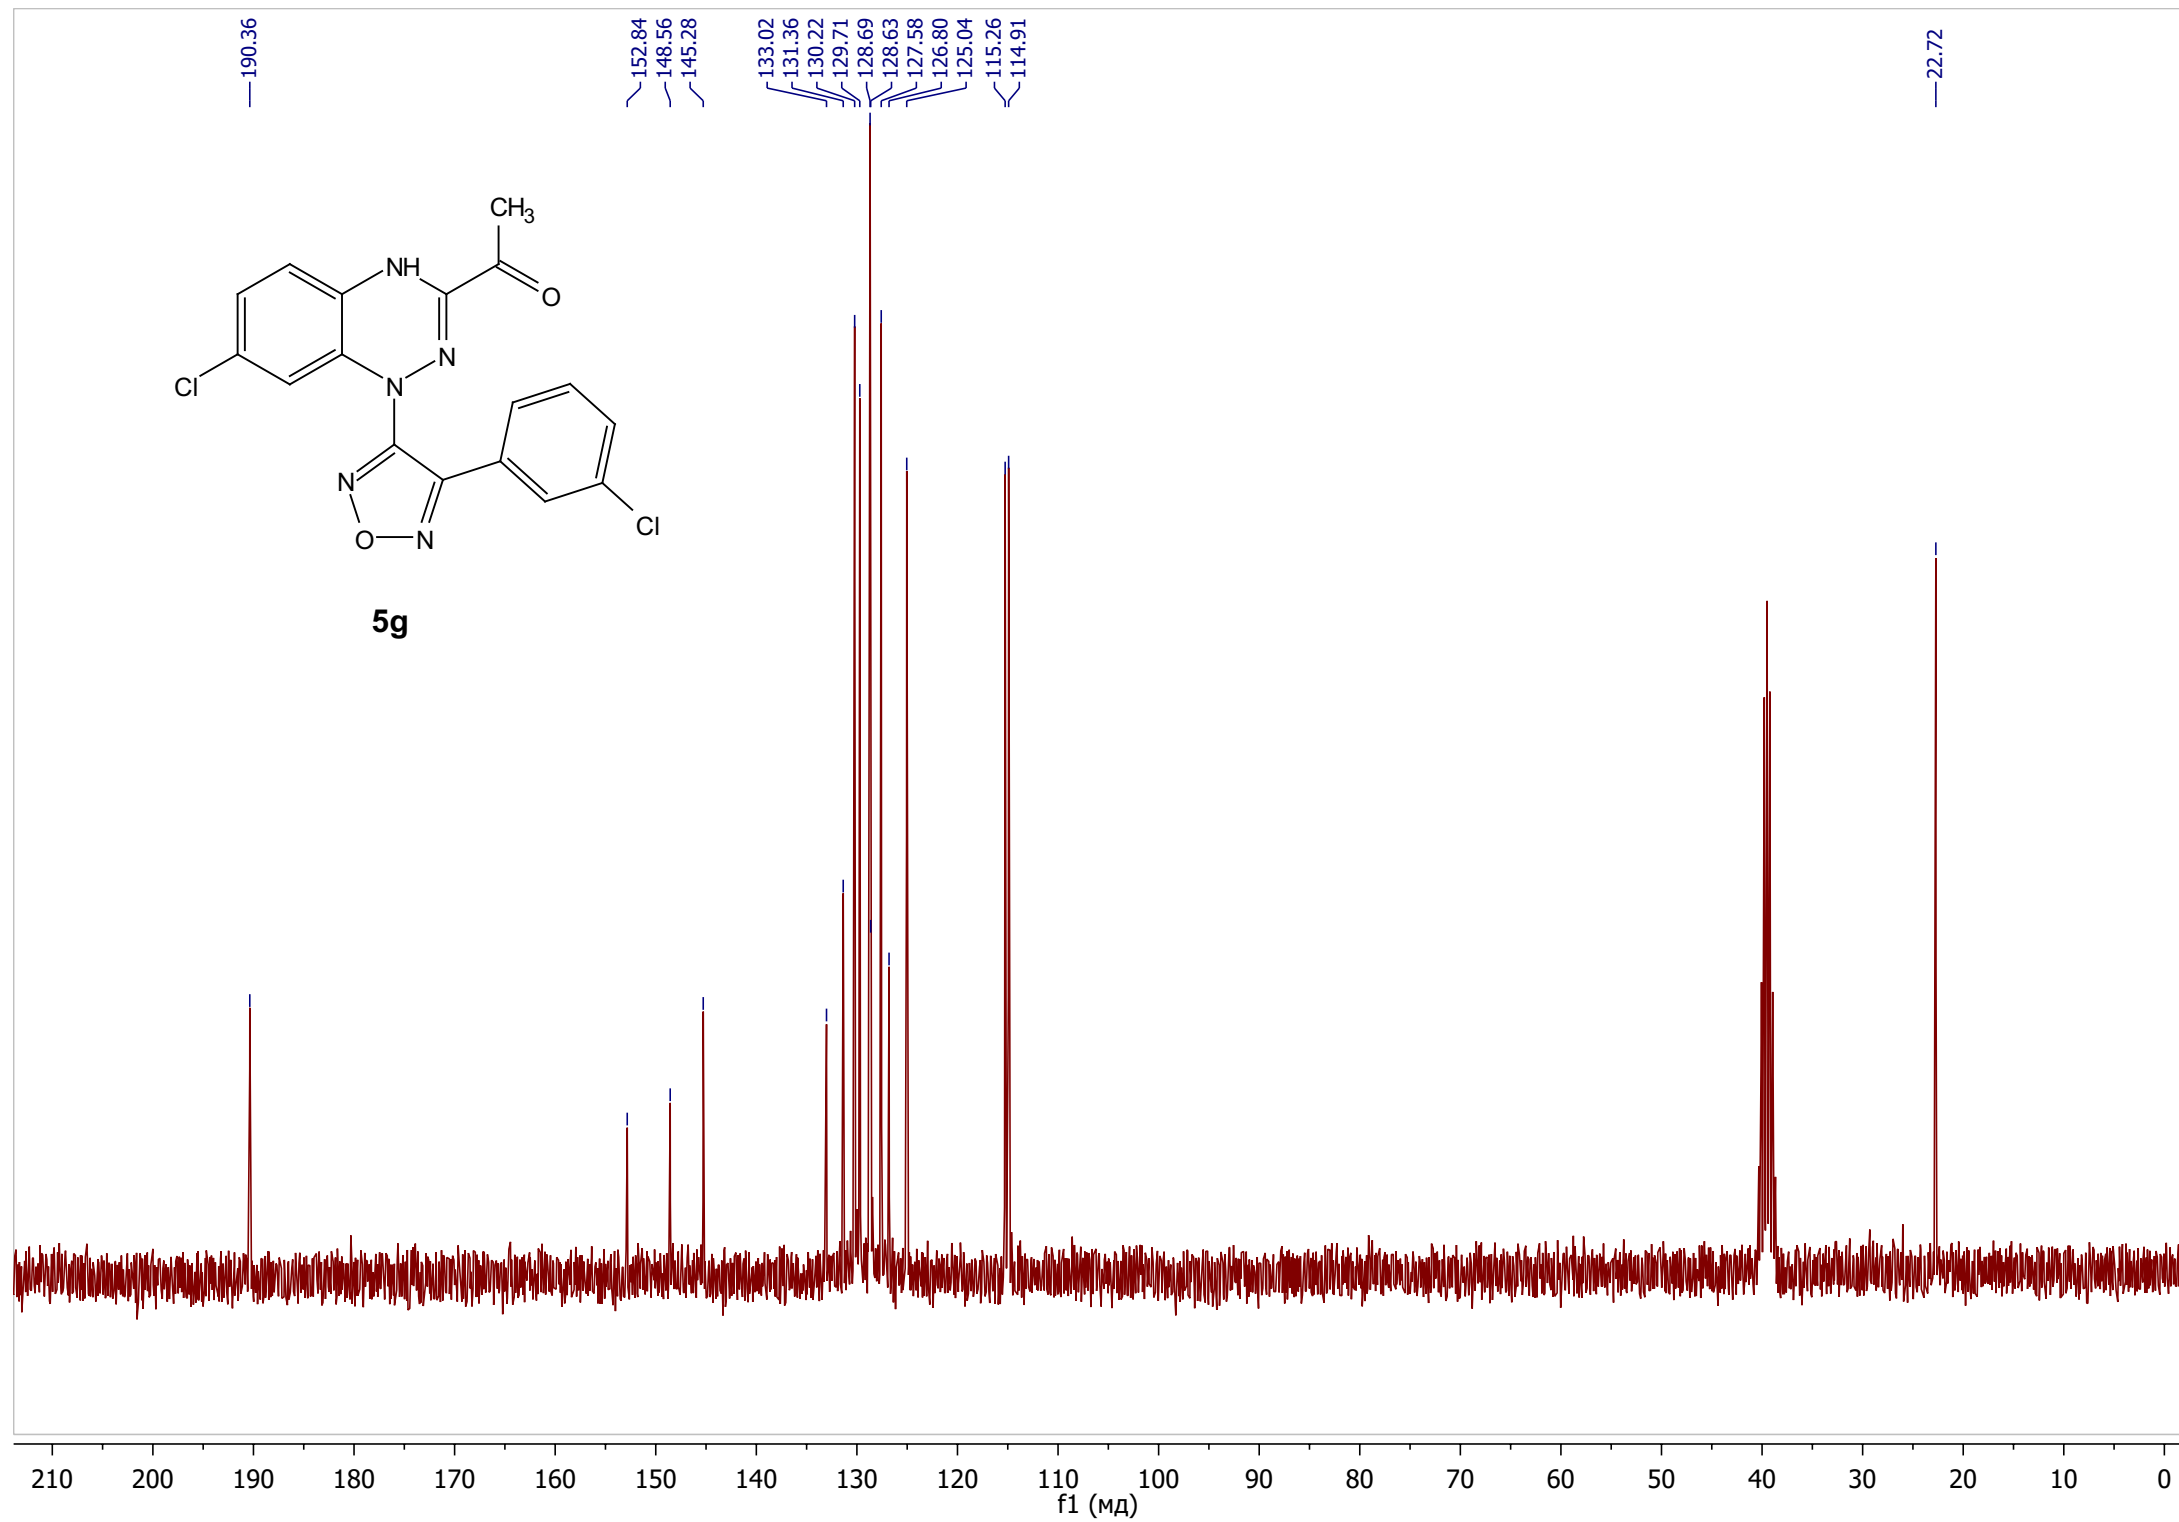

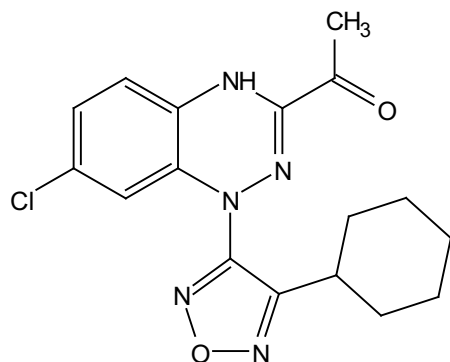

**5h**

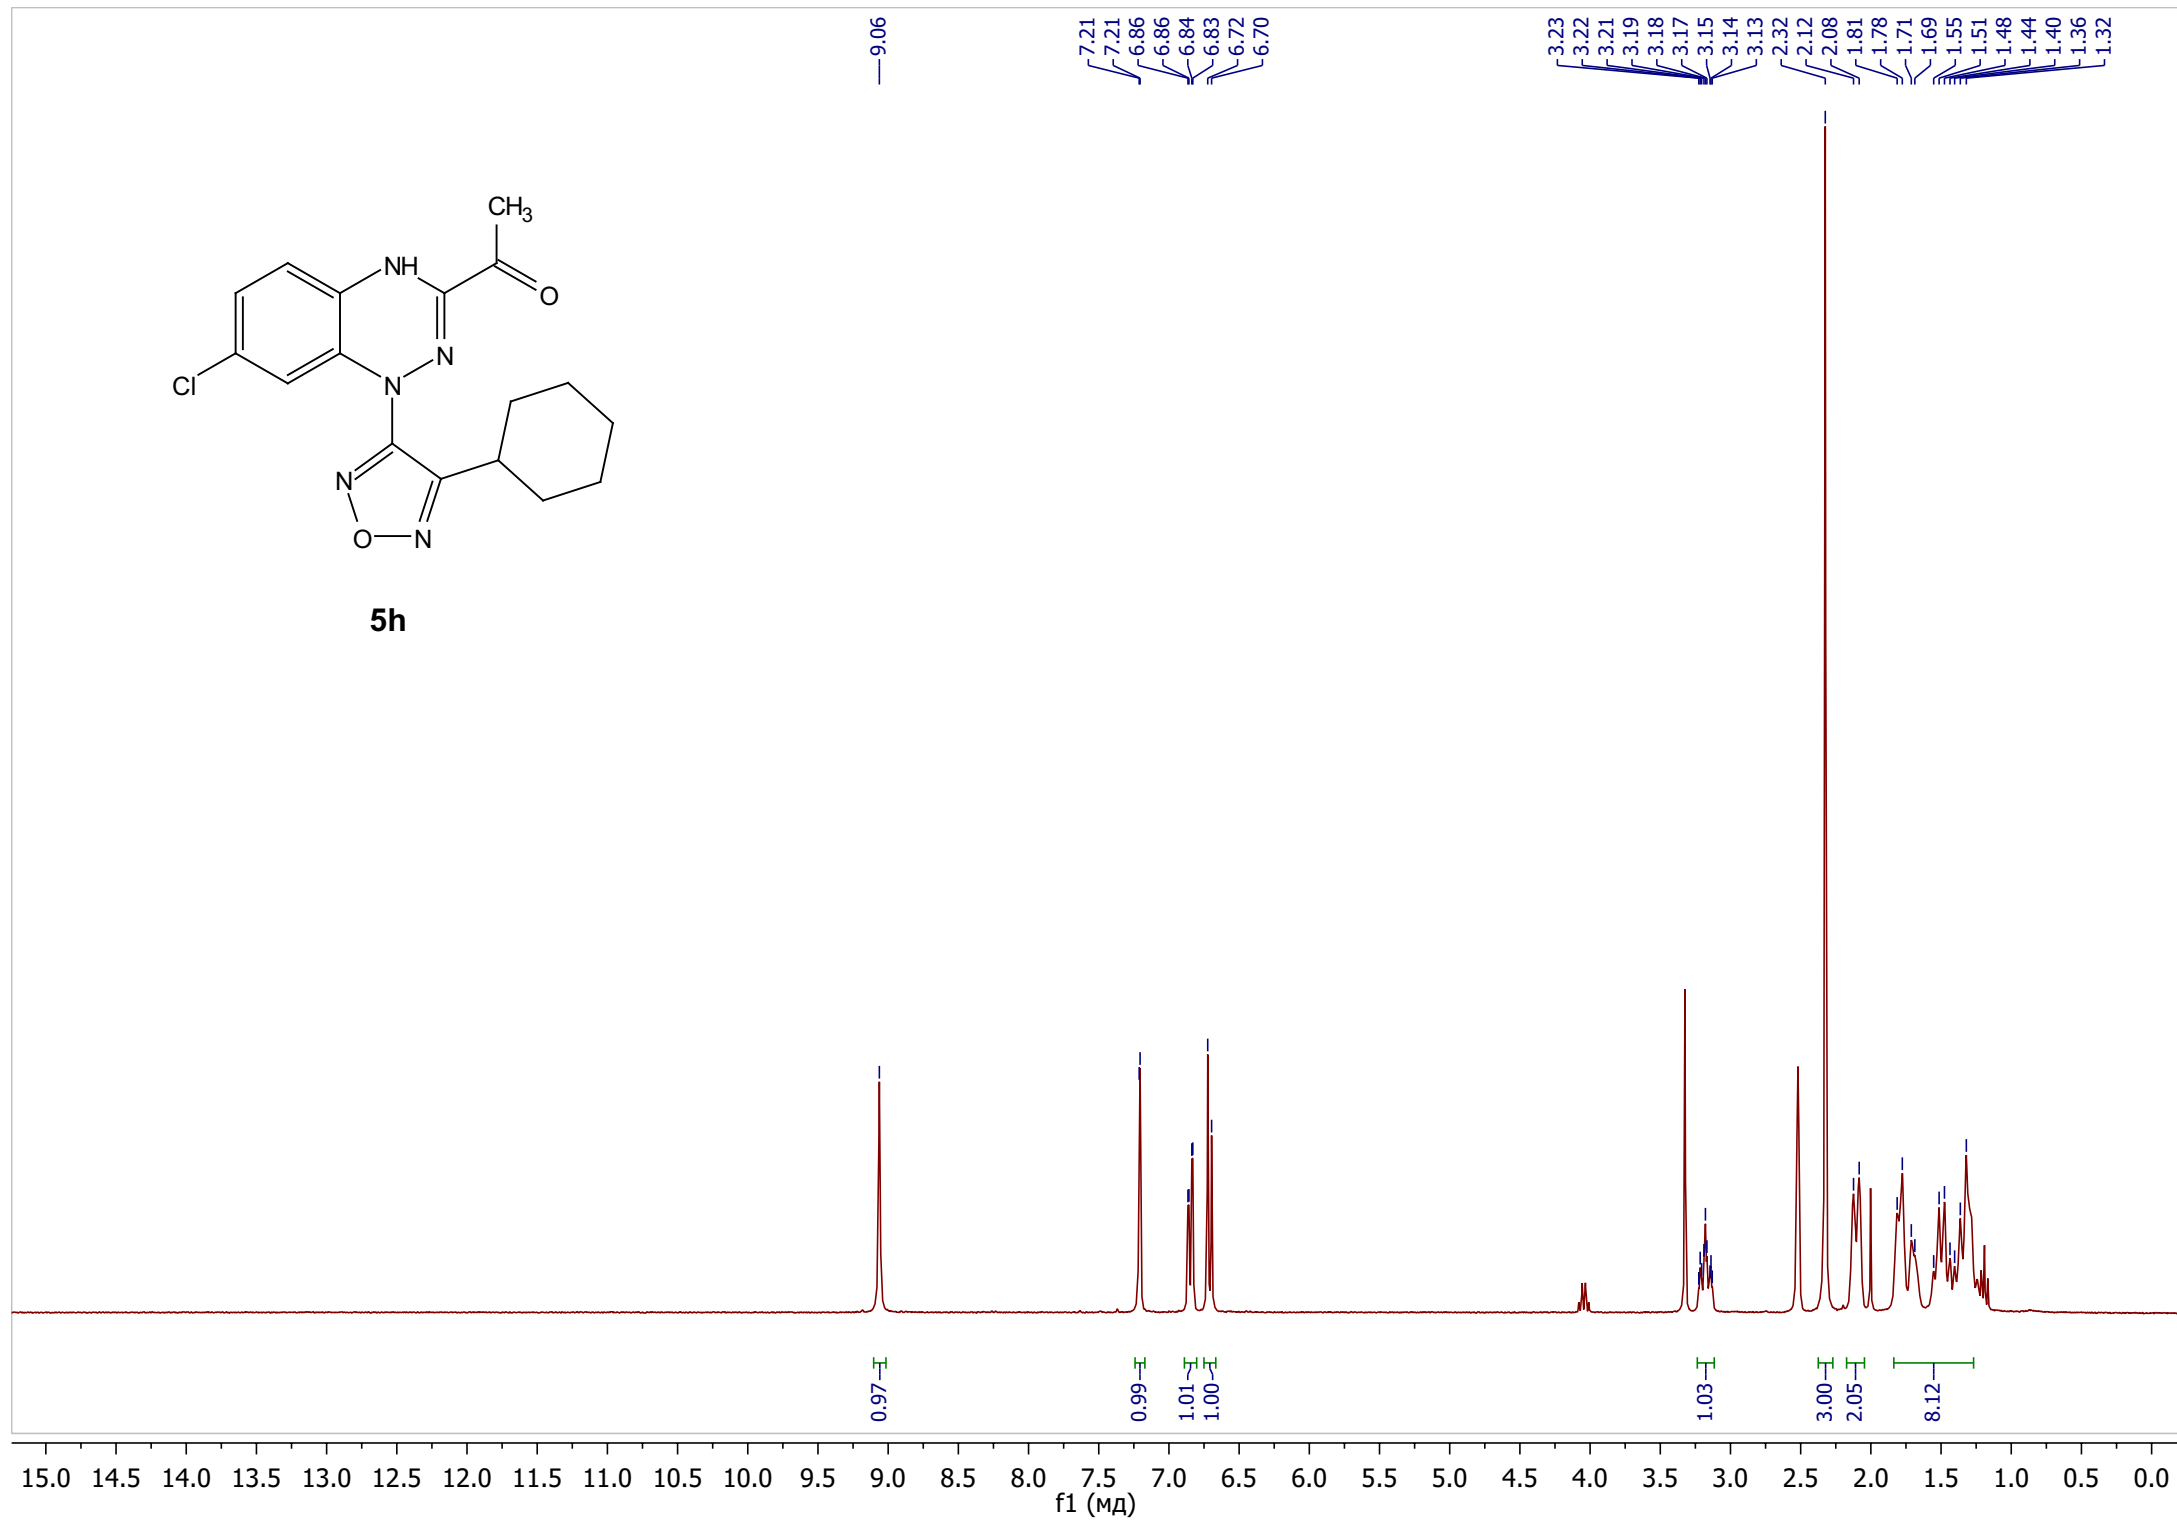



**5h**

190.42

154.44

152.78

145.89

131.55

129.16

126.77

124.94

115.22

114.58

34.10

31.18

25.48

25.32

24.17

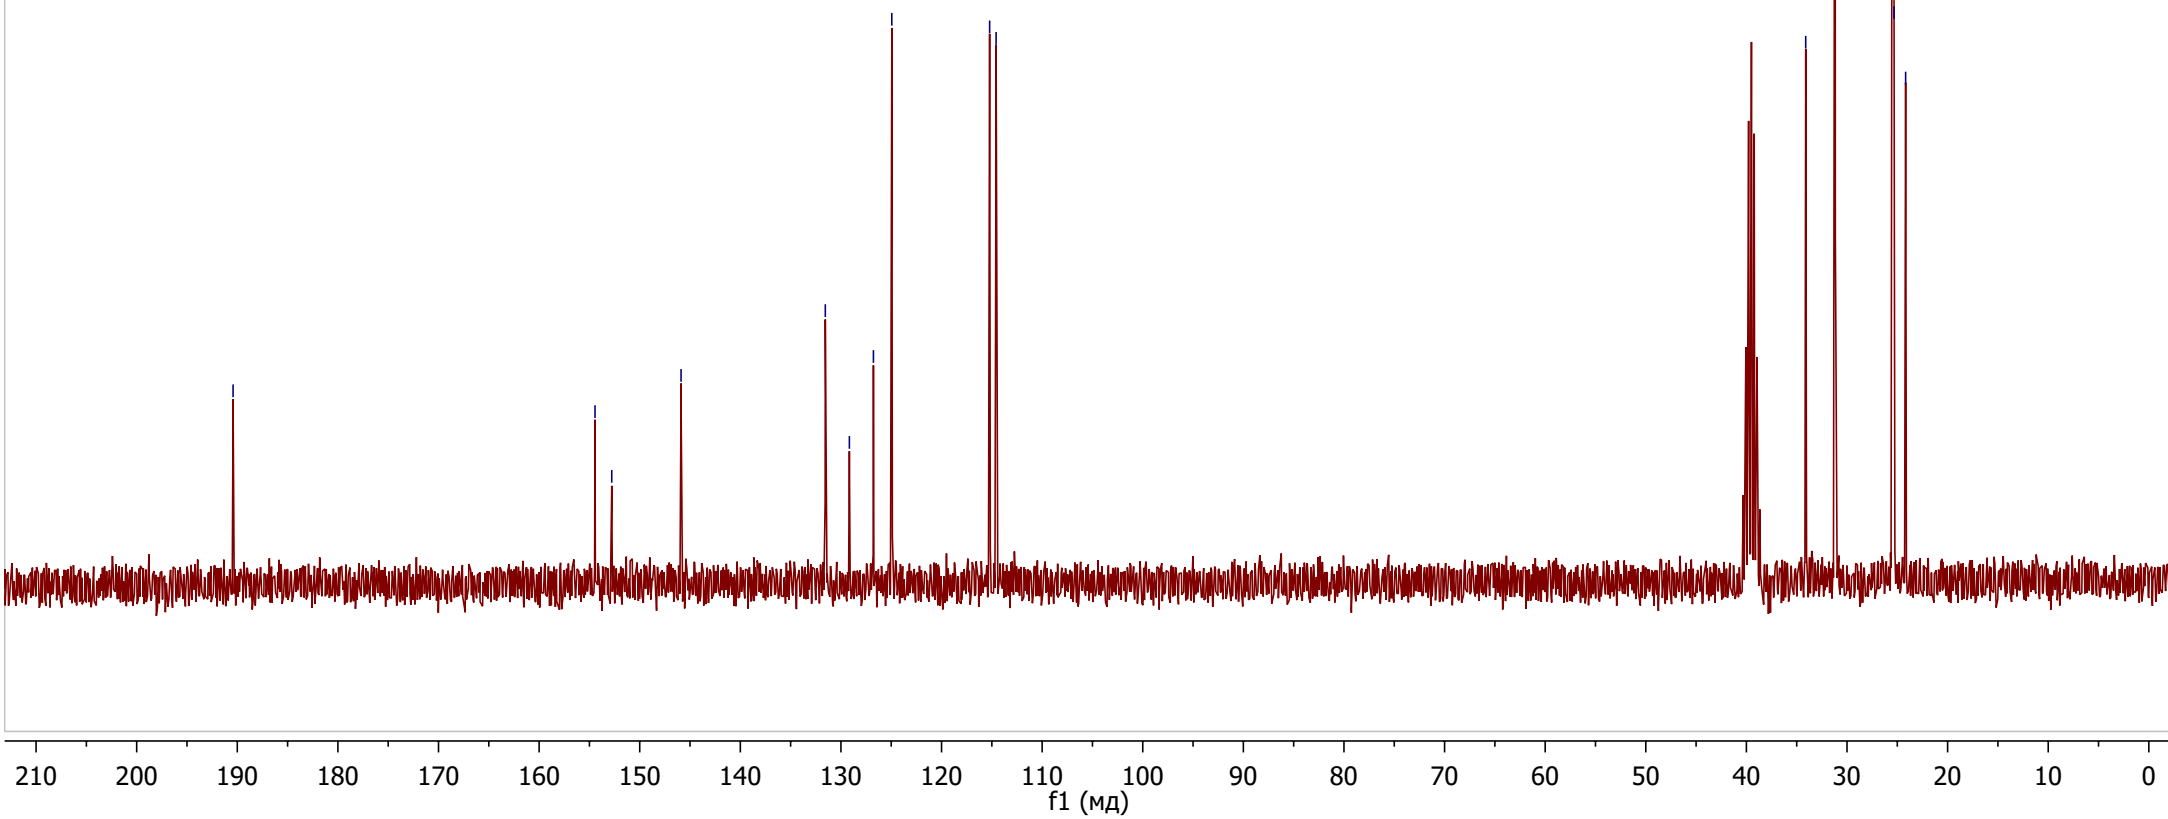



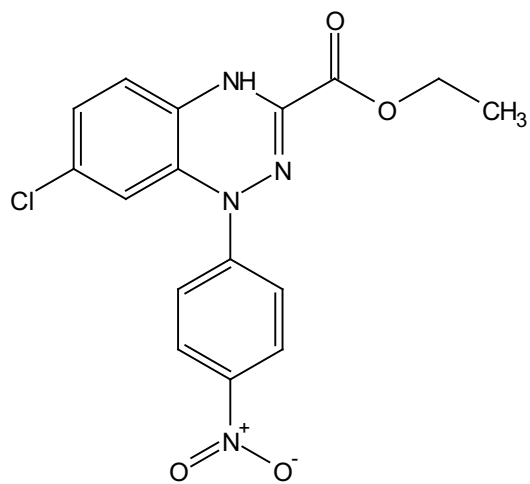

**5i**

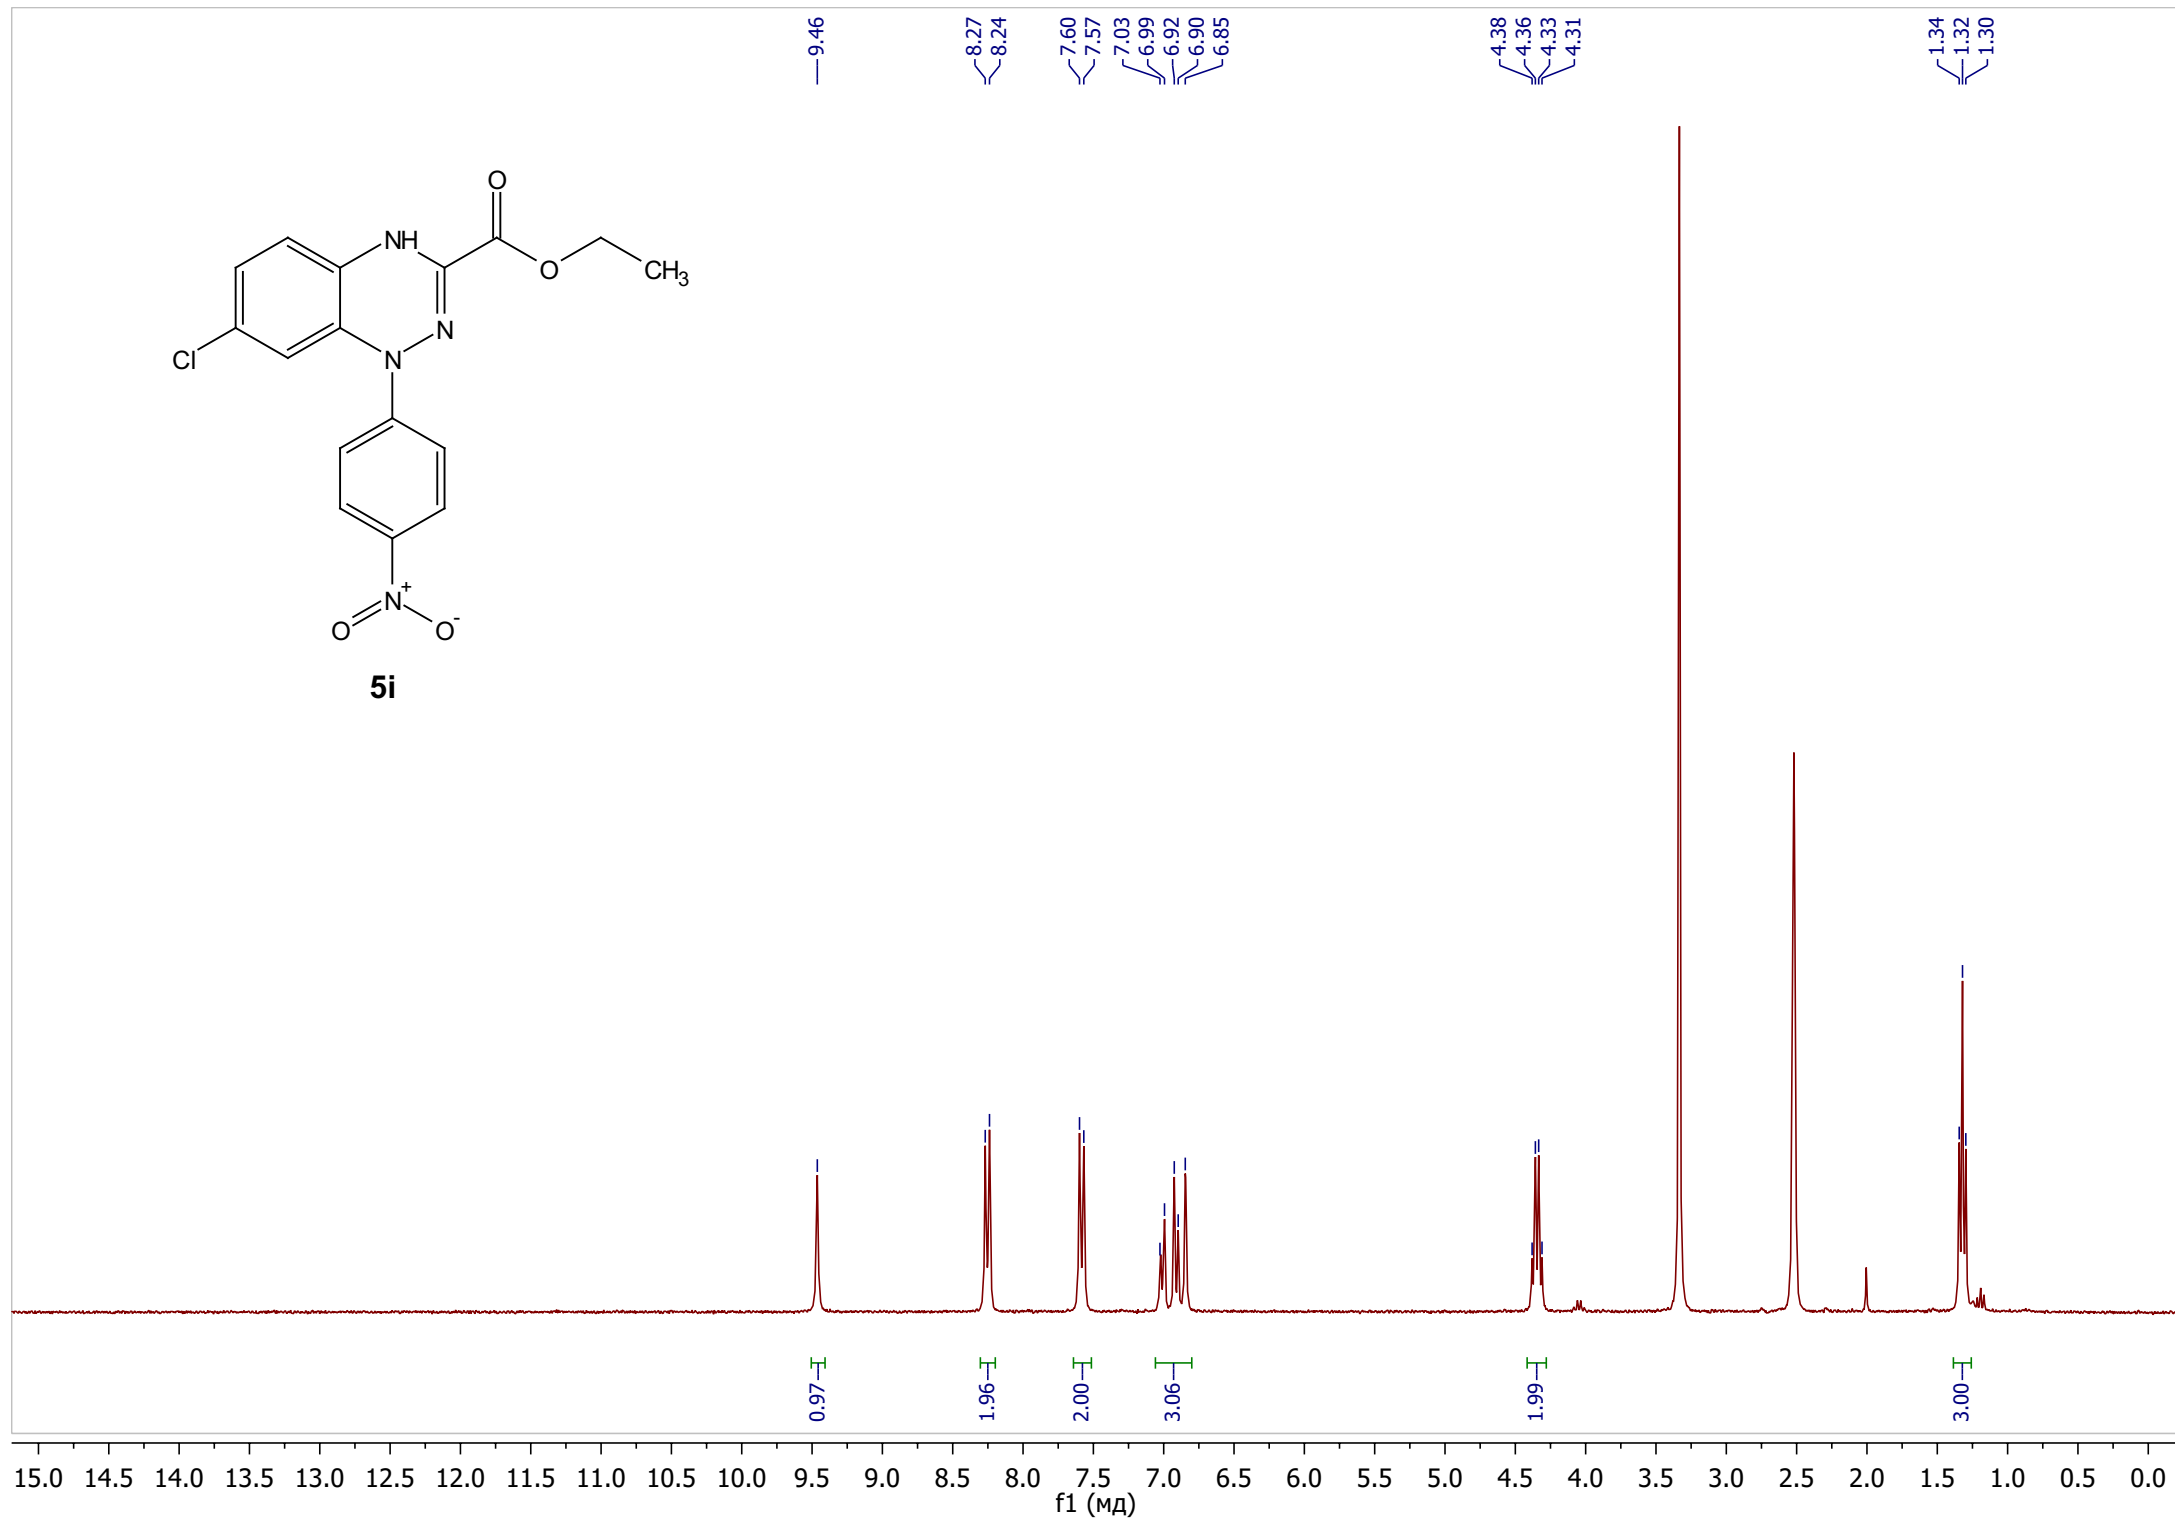



**5i**

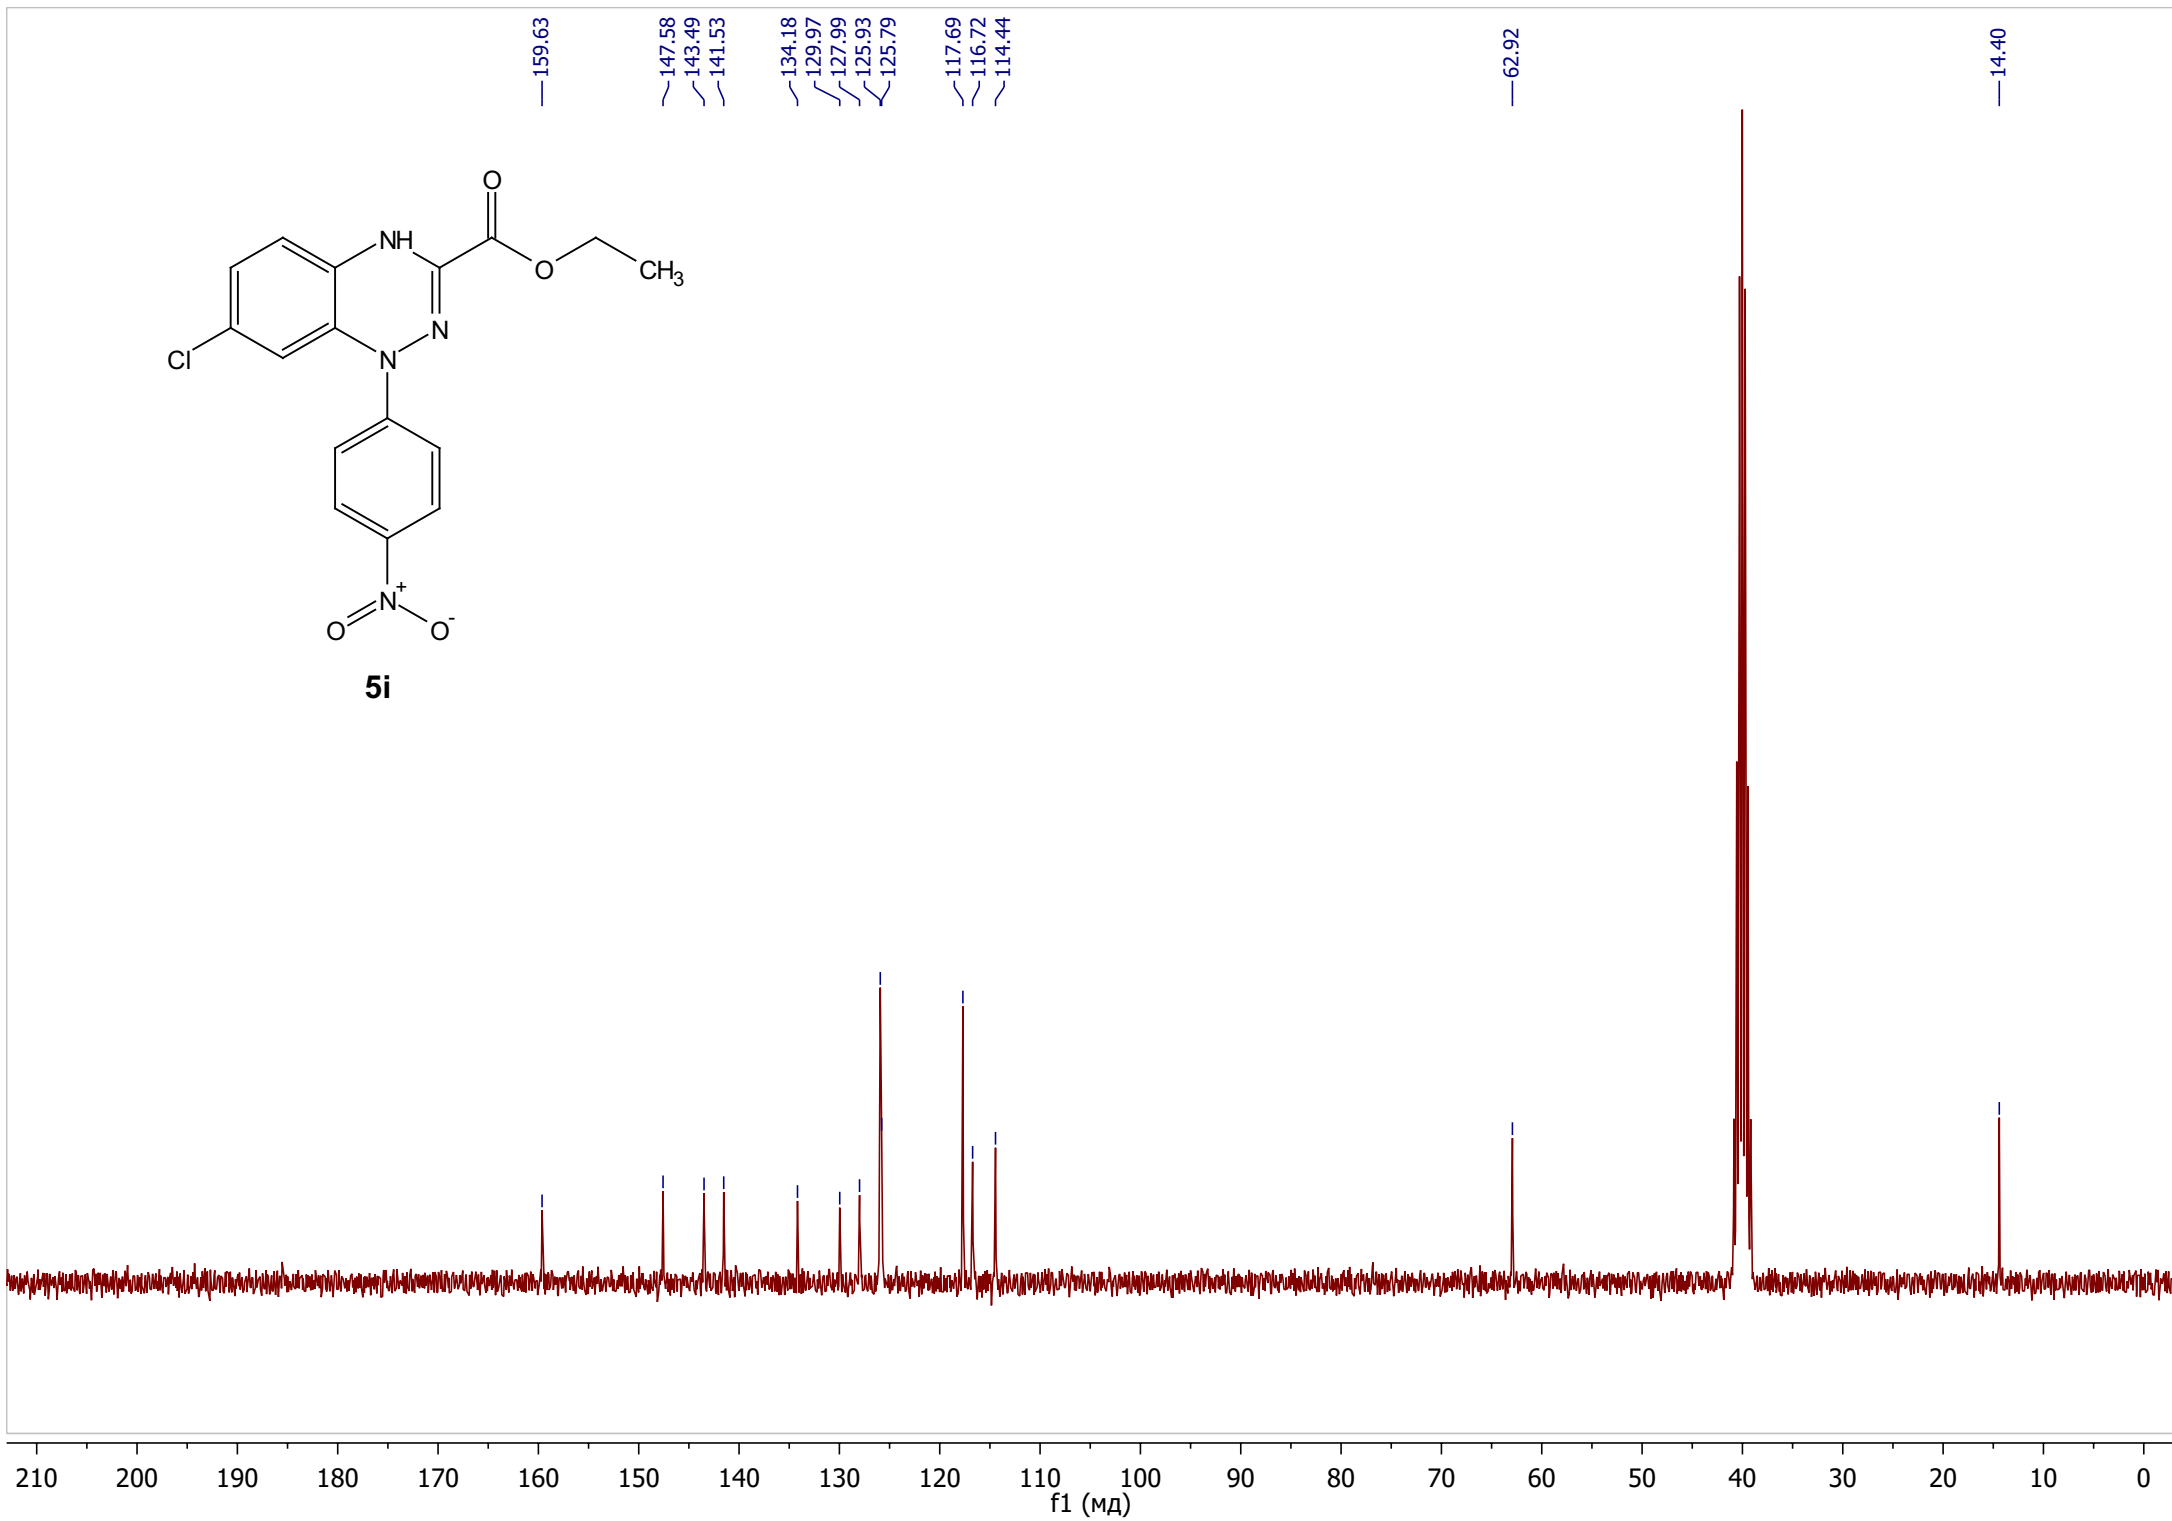

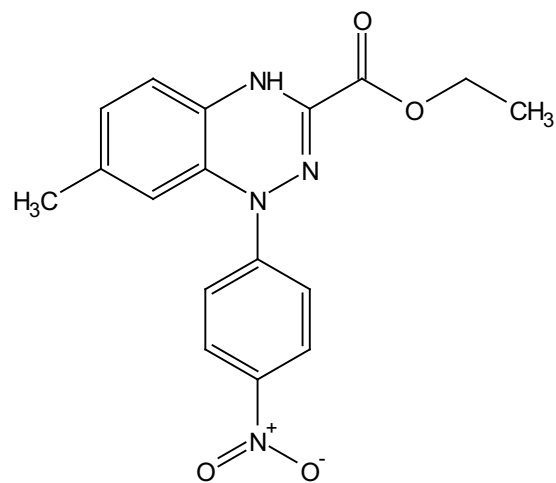

**5j**

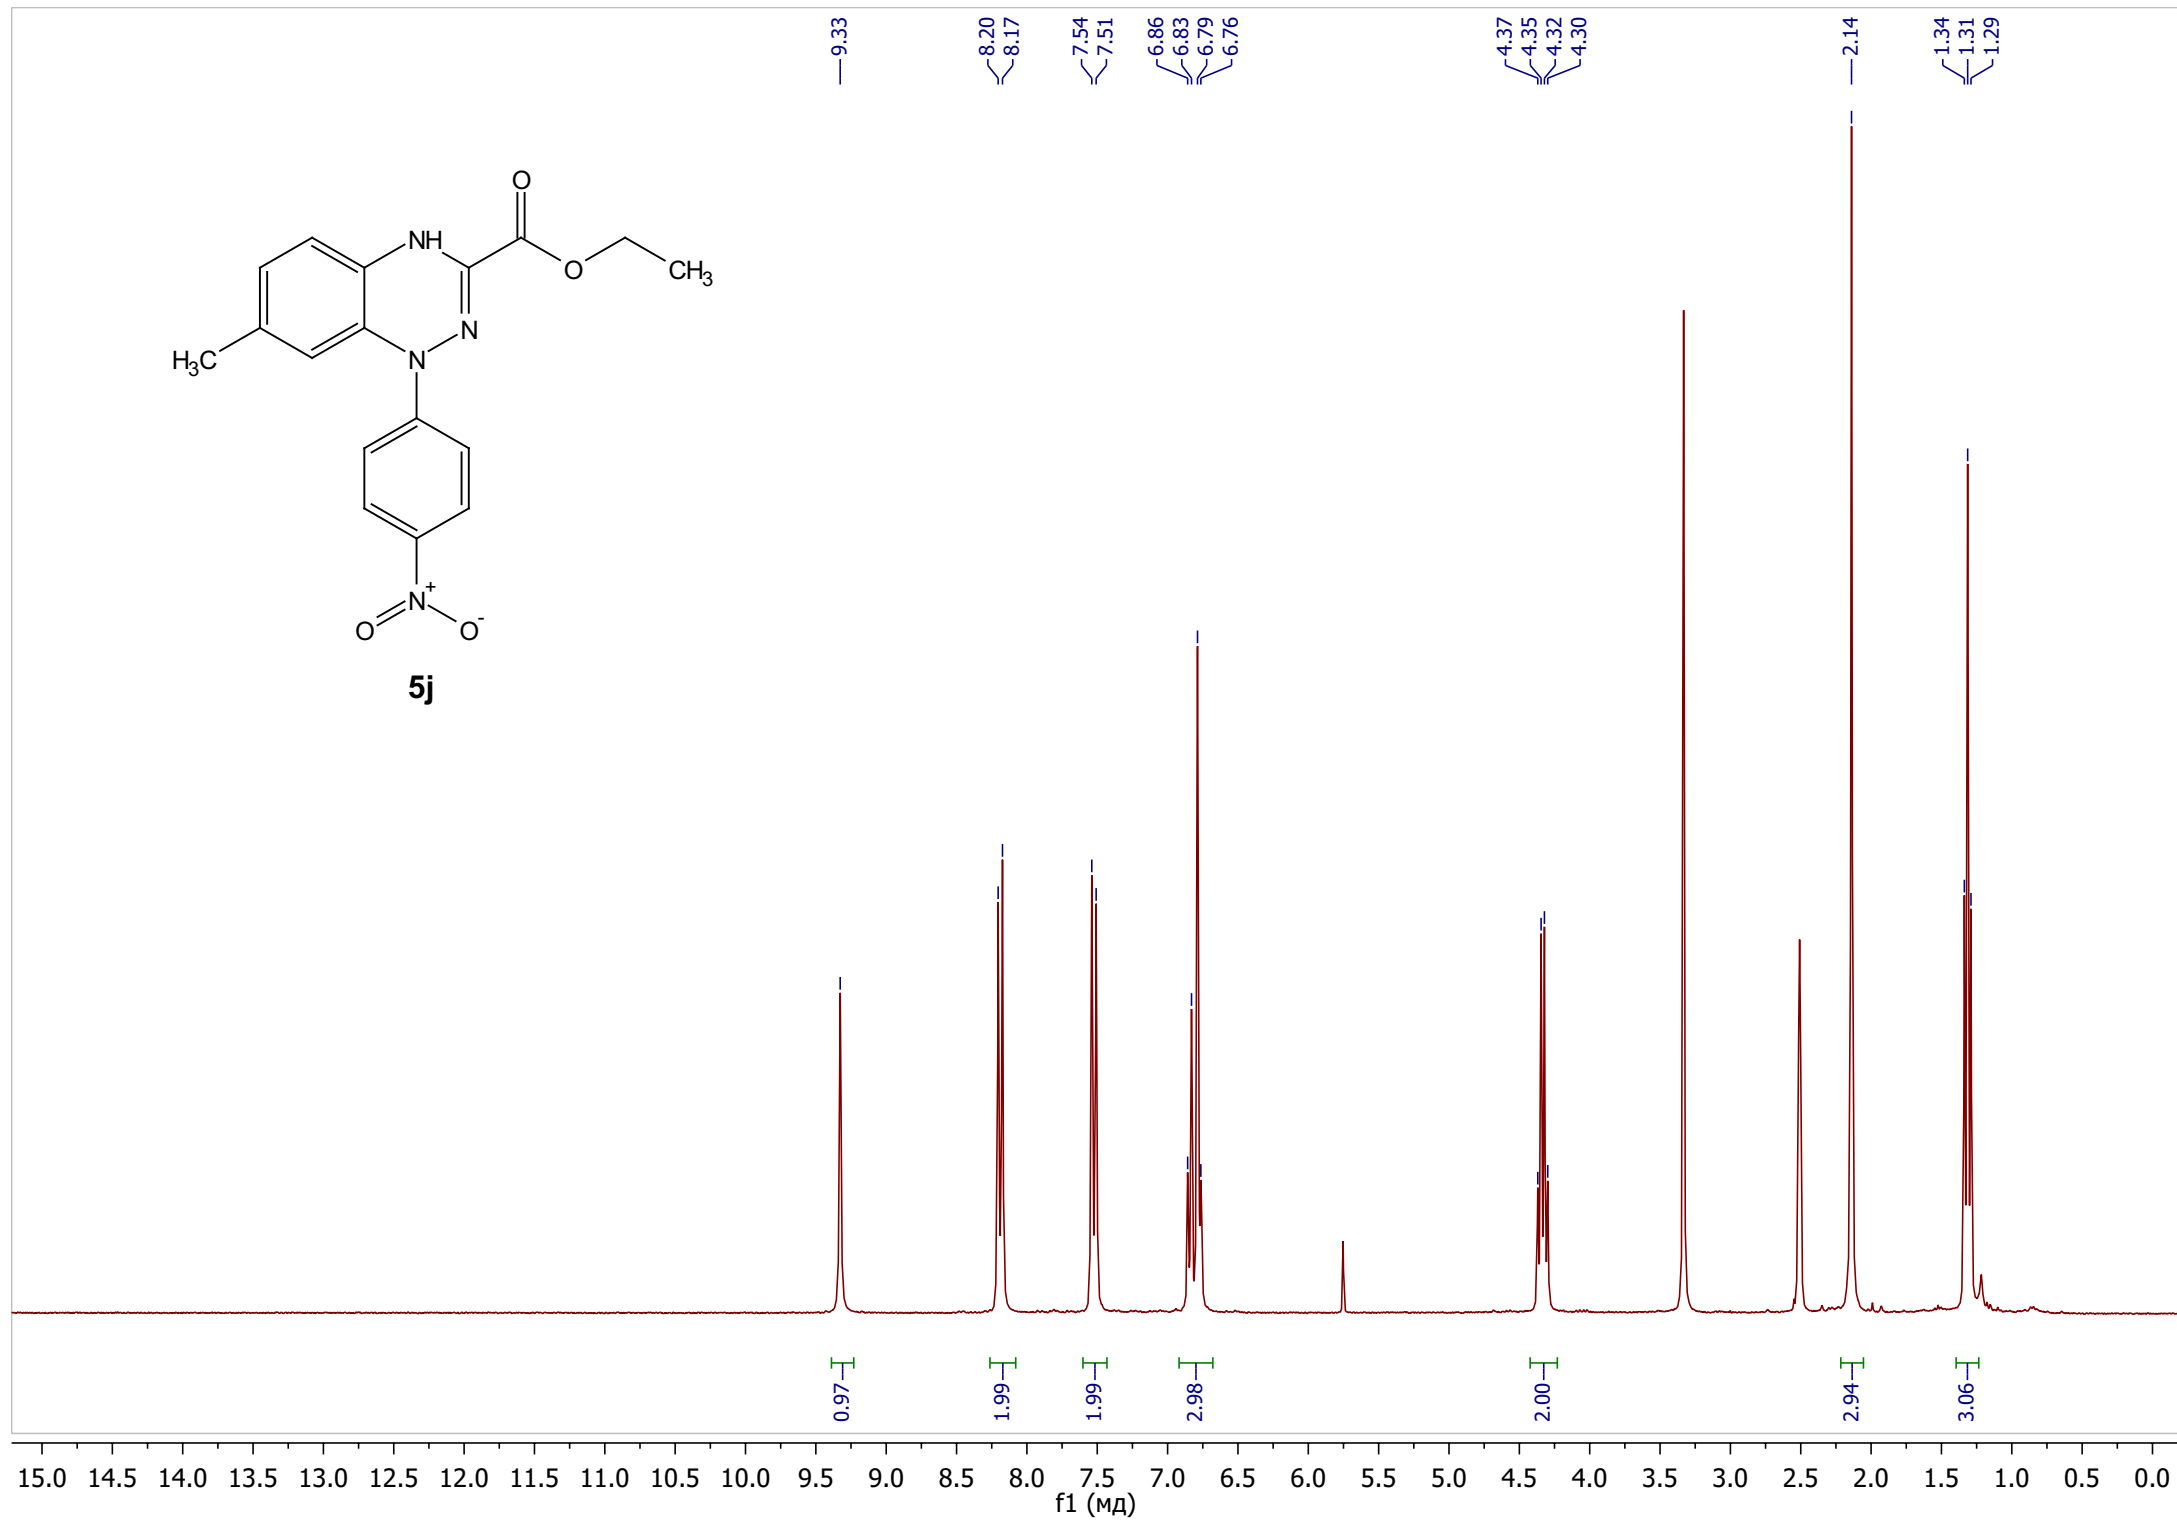



5j

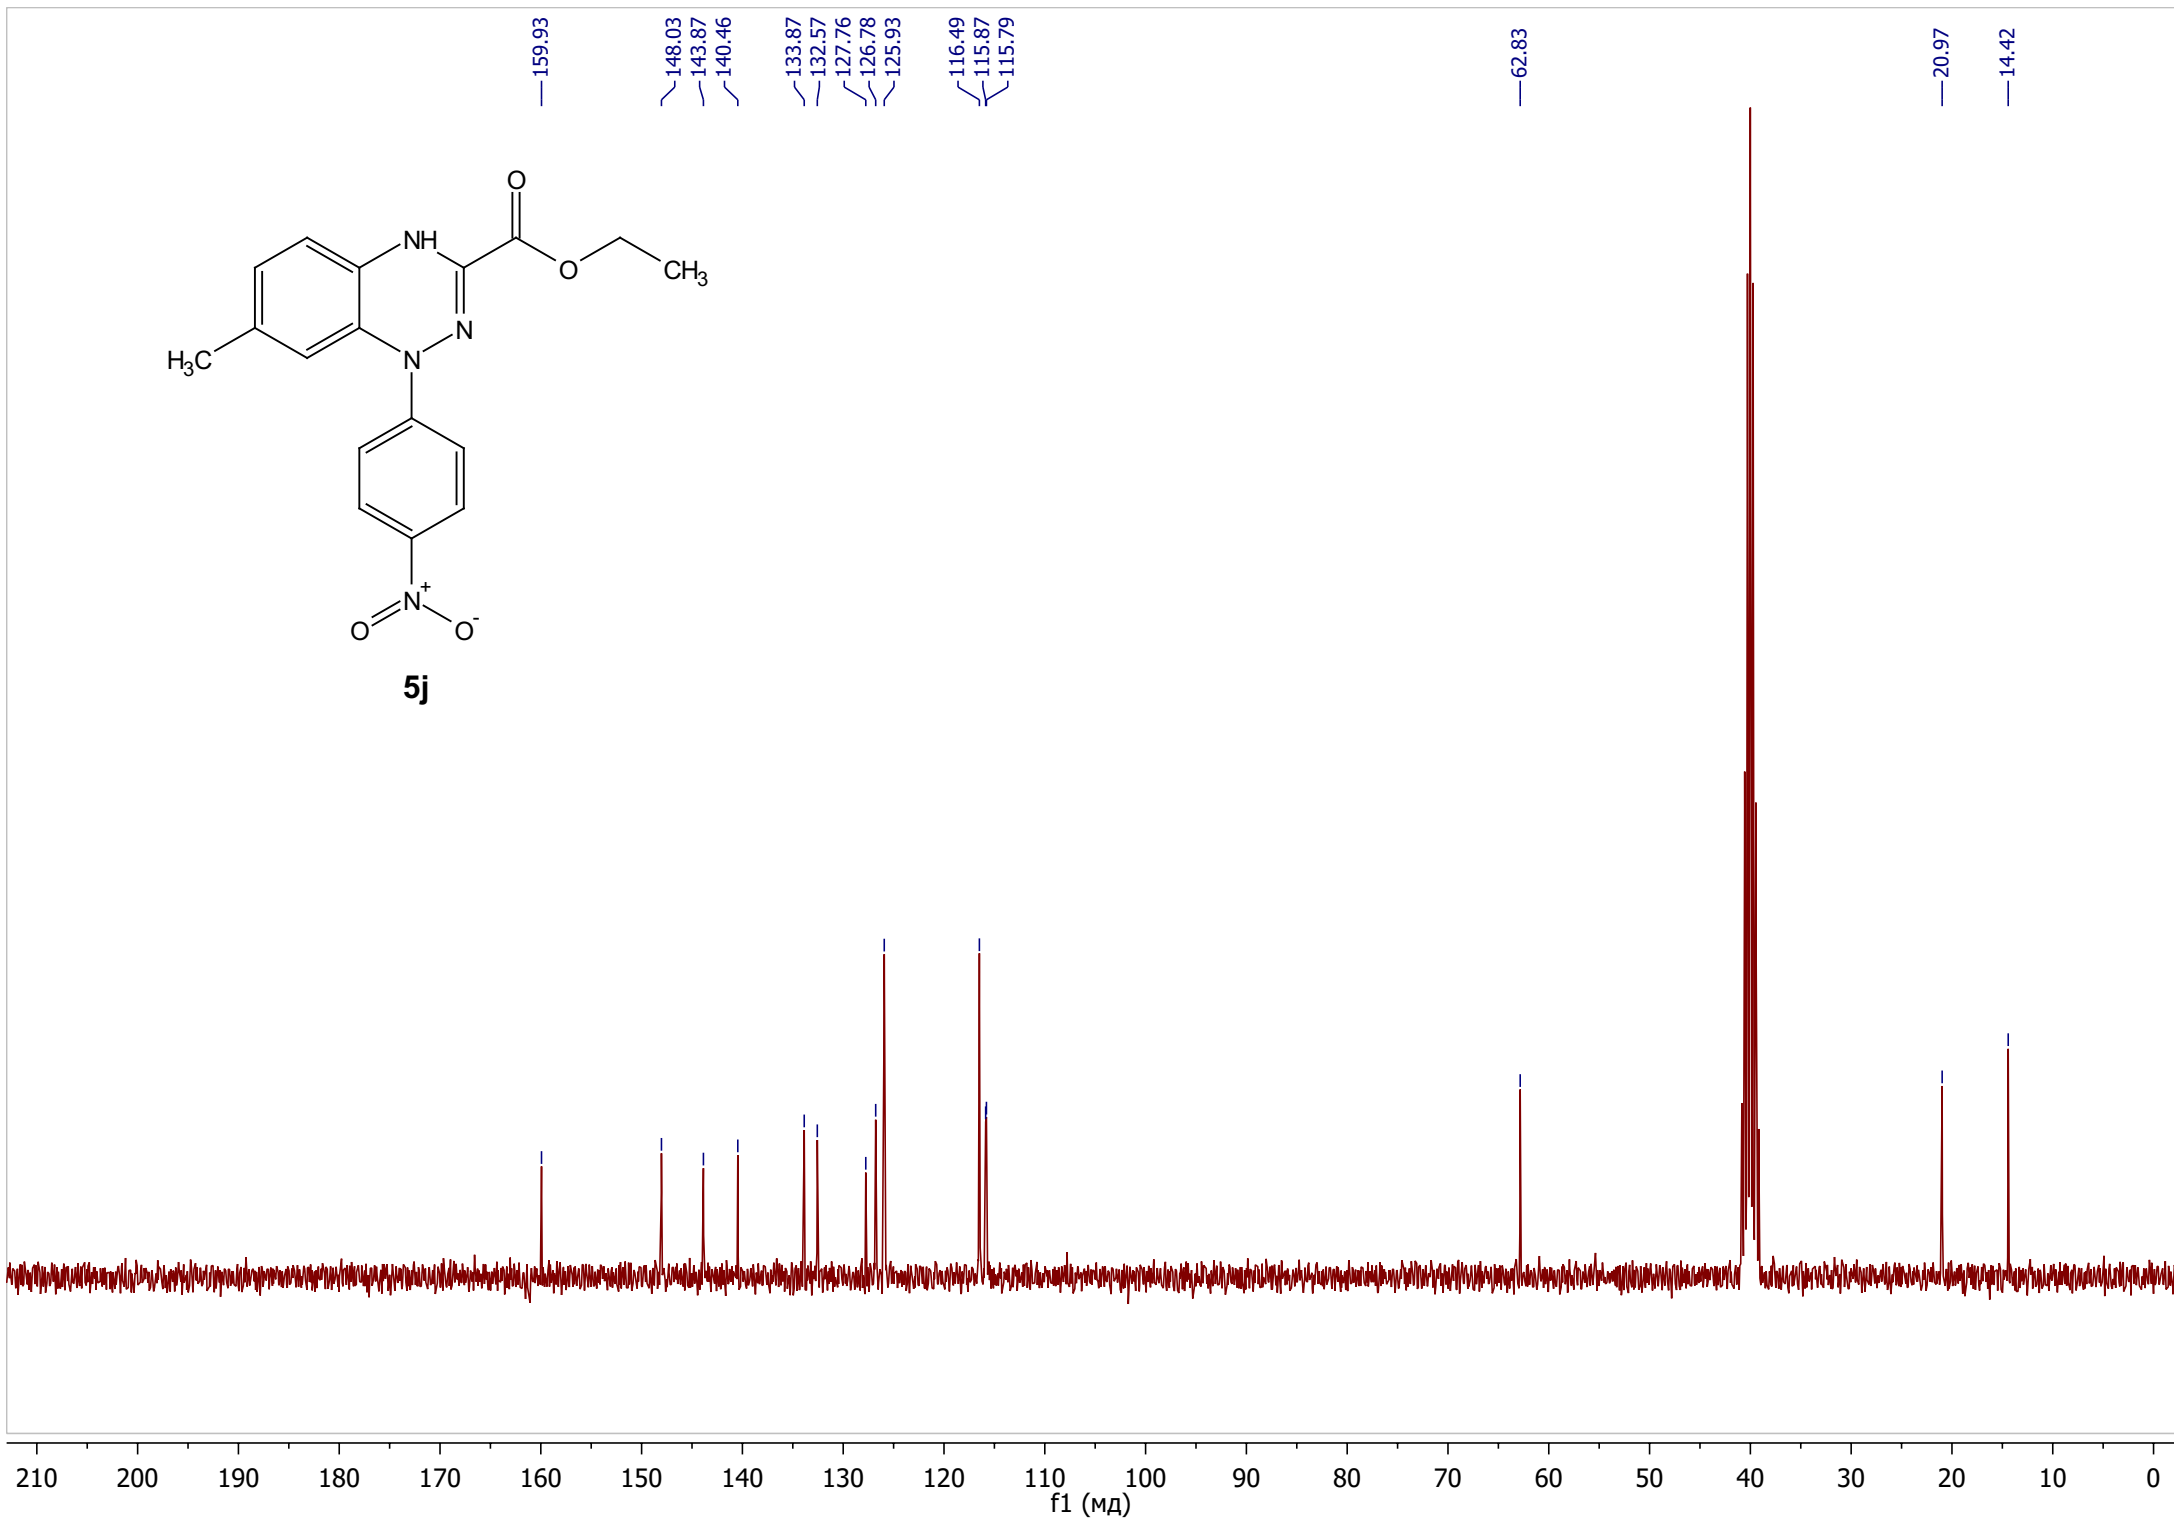

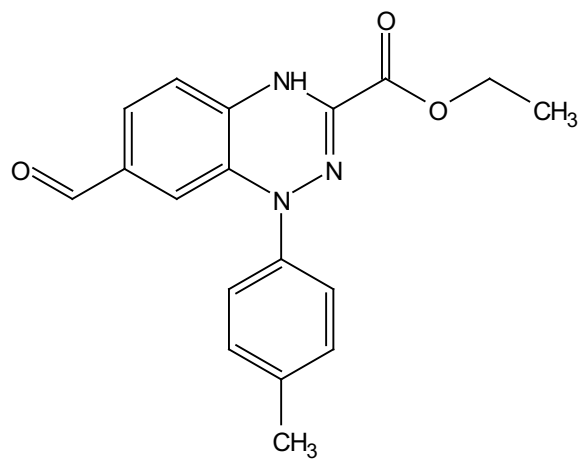

**5k**

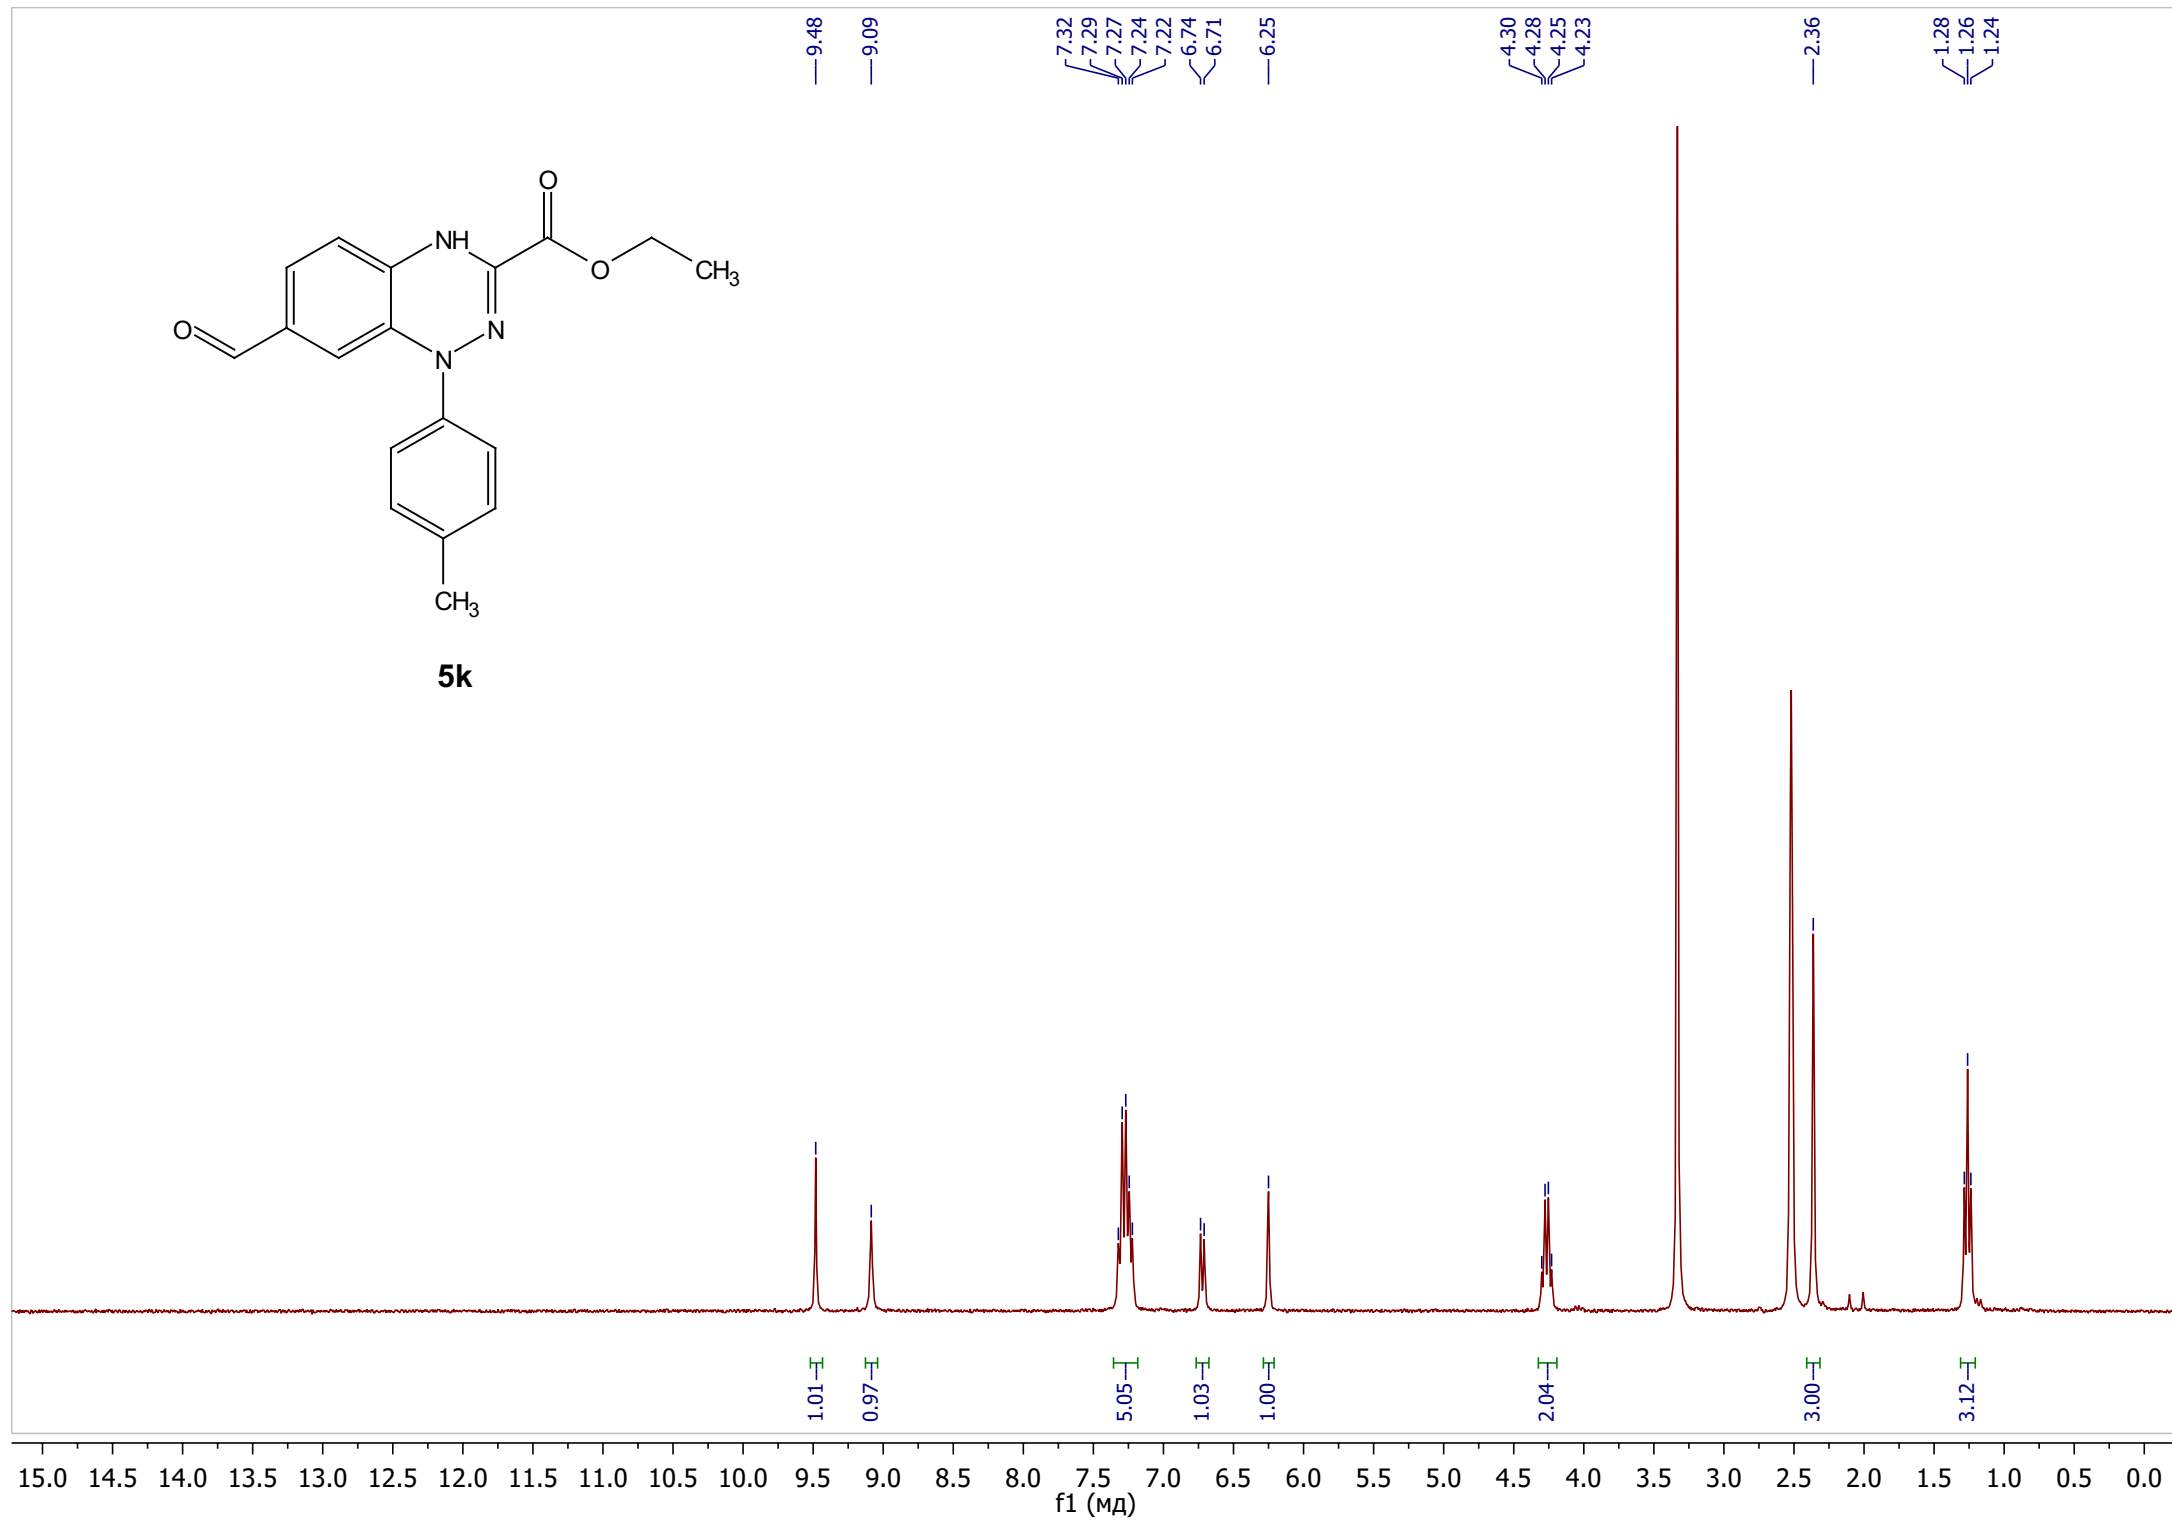

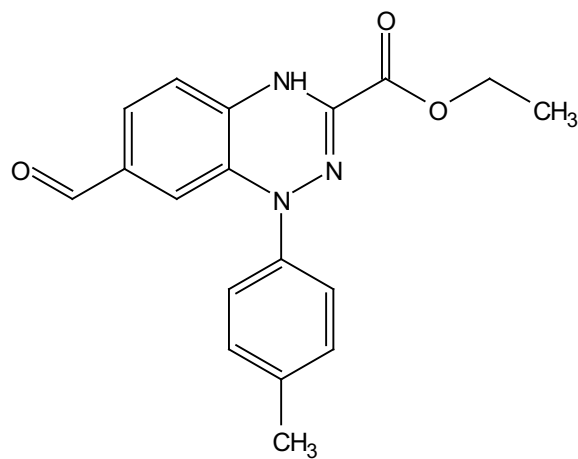

**5k**

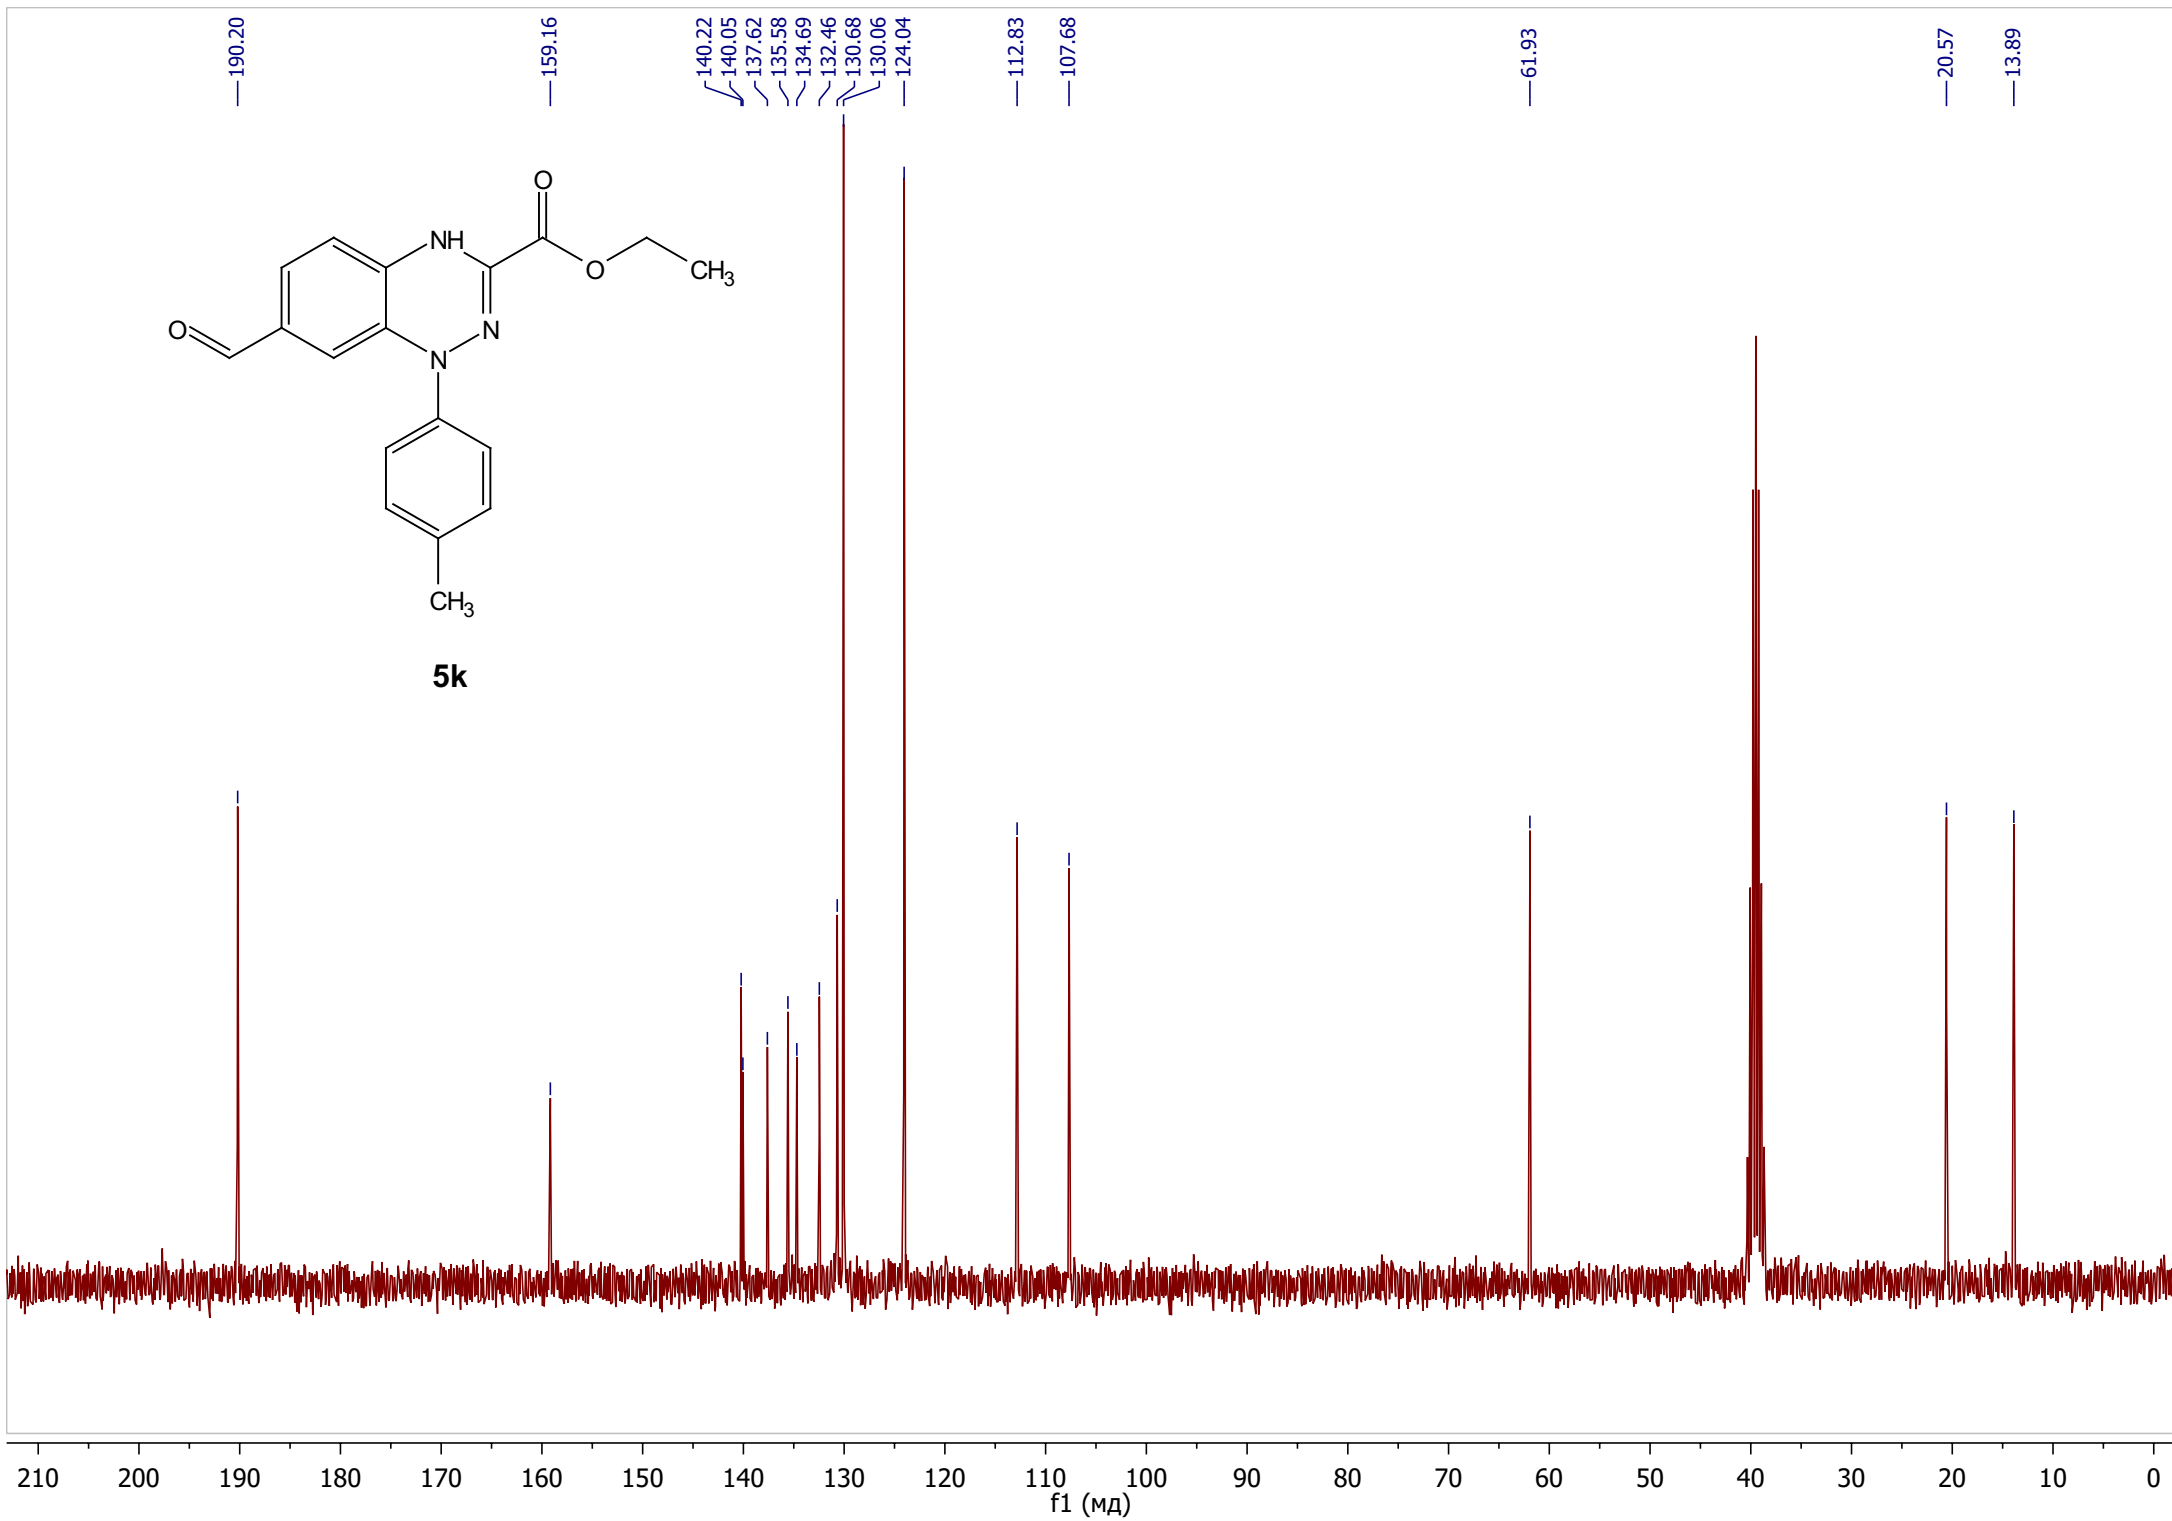

# Display Report

## Analysis Info

Analysis Name D:\Data\Kolotyrkina\2021\Epishina\1005006.d  
Method tune\_50-1600.m  
Sample Name /PVYU 1073R  
Comment C15H10Cl2N3O mH 319.0273 calibrant added, CH3CN

Acquisition Date 05.10.2021 11:06:32

Operator BDAL@DE  
Instrument / Ser# microTOF 10248

## Acquisition Parameter

|             |            |                      |          |                  |           |
|-------------|------------|----------------------|----------|------------------|-----------|
| Source Type | ESI        | Ion Polarity         | Positive | Set Nebulizer    | 1.0 Bar   |
| Focus       | Not active |                      |          | Set Dry Heater   | 200 °C    |
| Scan Begin  | 50 m/z     | Set Capillary        | 4500 V   | Set Dry Gas      | 4.0 l/min |
| Scan End    | 1600 m/z   | Set End Plate Offset | -500 V   | Set Divert Valve | Waste     |

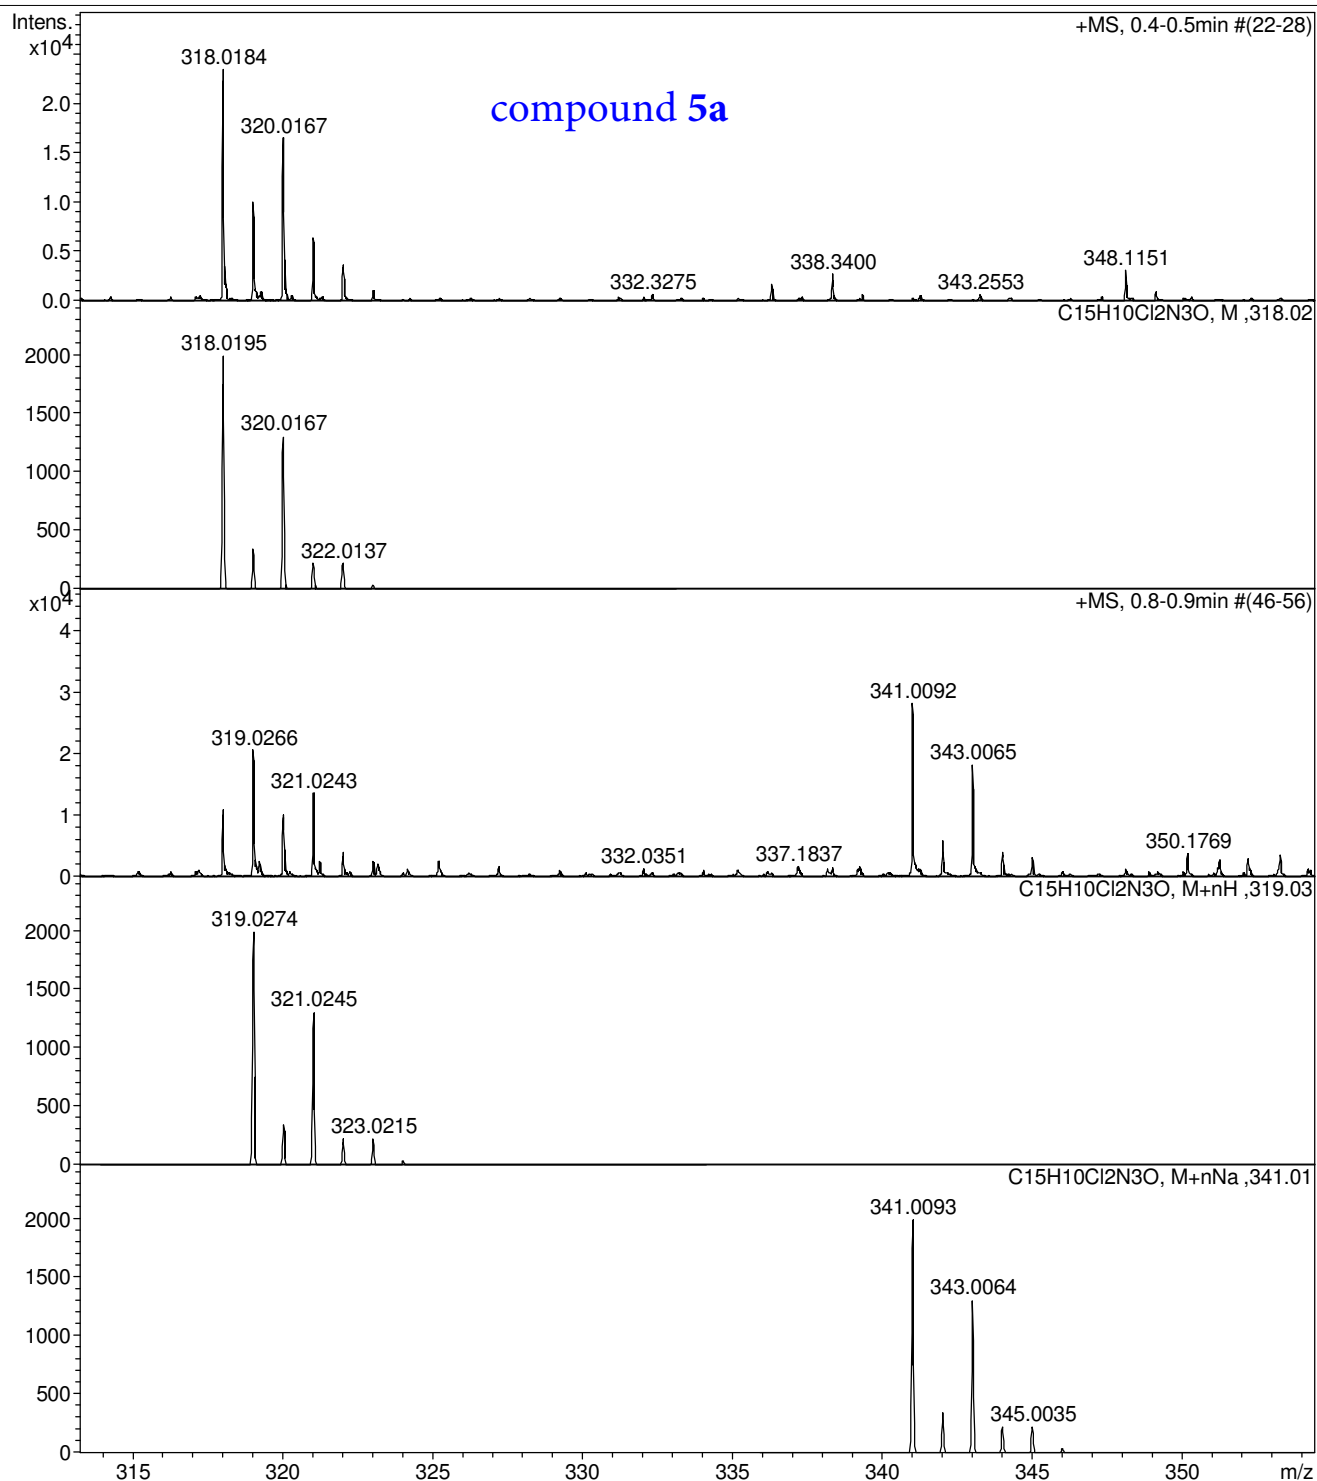

# Display Report

## Analysis Info

Analysis Name D:\Data\Kolotyrkina\2021\Epishina\1109002.d  
Method tune\_50-1600.m  
Sample Name /PVYU 1082  
Comment C15H12N4O3 mH, 297.0982 calibrant added CH3CN

Acquisition Date 09.11.2021 9:51:51

Operator BDAL@DE  
Instrument / Ser# micrOTOF 10248

## Acquisition Parameter

|             |            |                      |          |                  |           |
|-------------|------------|----------------------|----------|------------------|-----------|
| Source Type | ESI        | Ion Polarity         | Positive | Set Nebulizer    | 1.0 Bar   |
| Focus       | Not active |                      |          | Set Dry Heater   | 200 °C    |
| Scan Begin  | 50 m/z     | Set Capillary        | 4500 V   | Set Dry Gas      | 4.0 l/min |
| Scan End    | 1600 m/z   | Set End Plate Offset | -500 V   | Set Divert Valve | Waste     |

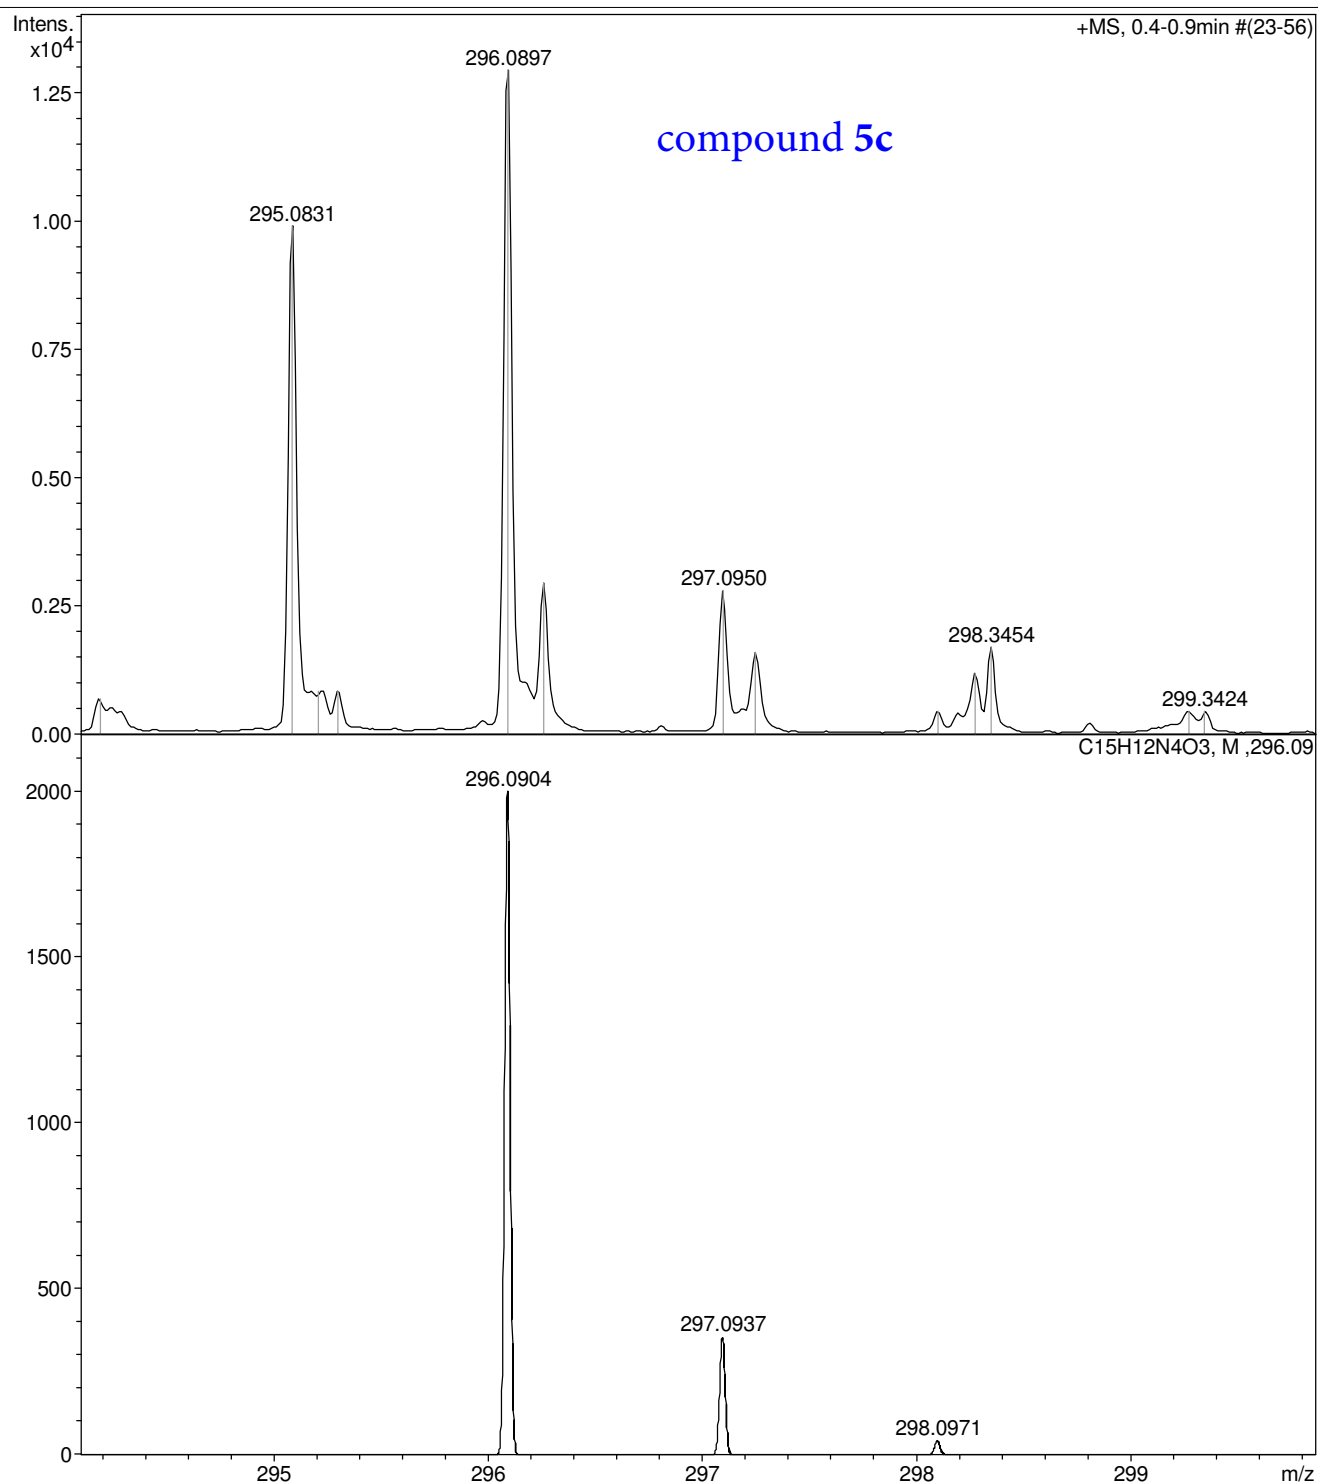



# Display Report

## Analysis Info

Analysis Name D:\Data\Kolotyrkina\2022\Epishina\0118005.d  
Method tune\_50-1600\_pos\_15\_12.m  
Sample Name /PVYU 1104-H\_Rep  
Comment C18H18N3O2 m 309.1401 calibrant added CH3CN

Acquisition Date 18.01.2022 12:05:40

Operator BDAL@DE  
Instrument / Ser# micrOTOF 10248

## Acquisition Parameter

|             |            |                      |          |                  |           |
|-------------|------------|----------------------|----------|------------------|-----------|
| Source Type | ESI        | Ion Polarity         | Positive | Set Nebulizer    | 0.4 Bar   |
| Focus       | Not active |                      |          | Set Dry Heater   | 180 °C    |
| Scan Begin  | 50 m/z     | Set Capillary        | 4500 V   | Set Dry Gas      | 4.0 l/min |
| Scan End    | 1600 m/z   | Set End Plate Offset | -500 V   | Set Divert Valve | Waste     |

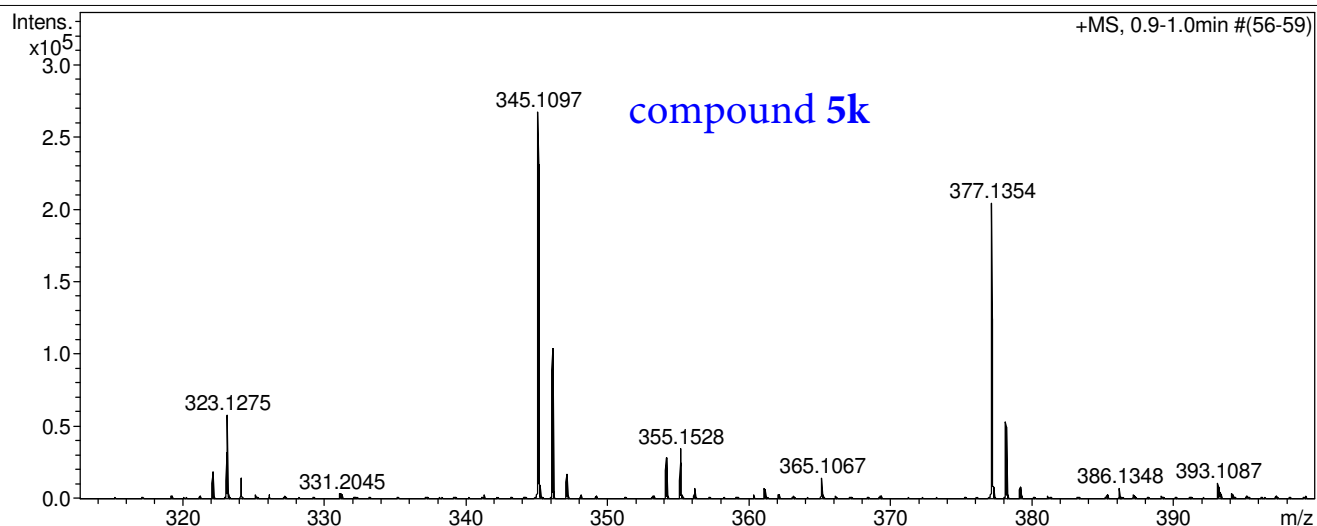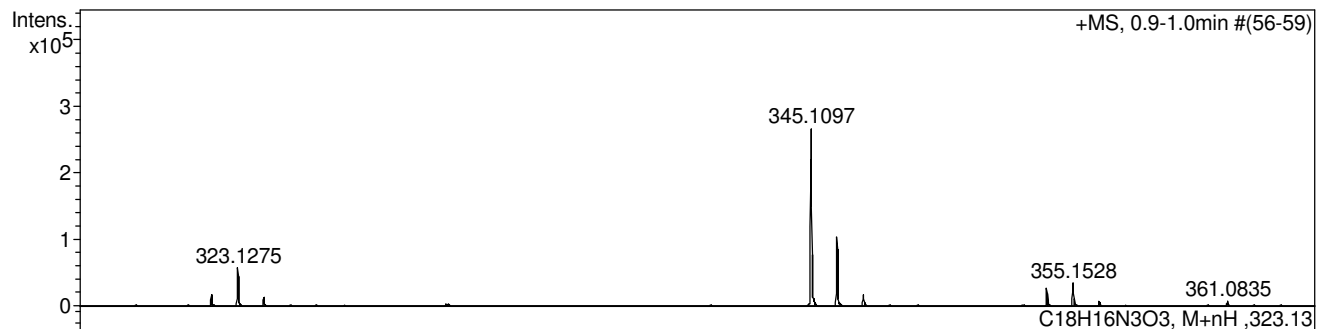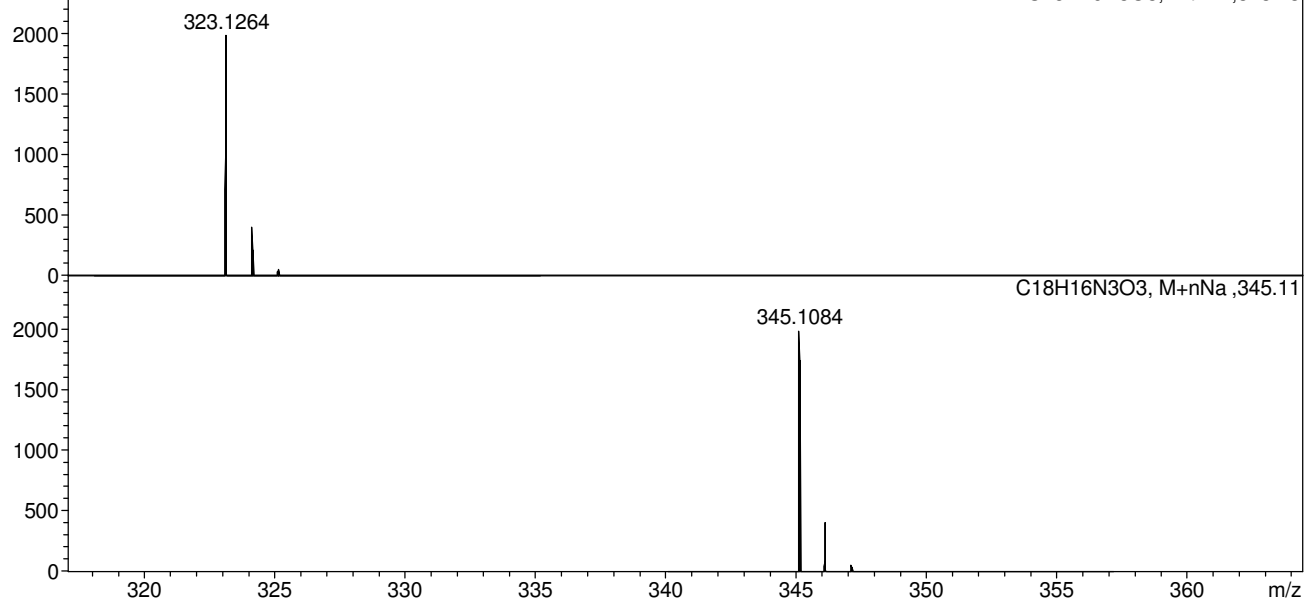

# Display Report

## Analysis Info

Analysis Name D:\Data\Kolotyrkina\2021\Epishina\1209010.d  
Method tune\_50-1600.m  
Sample Name /PVYU 1099-K  
Comment C16H12Cl2N3O2 mH 349.0379 clb added CH3CN

Acquisition Date 09.12.2021 11:05:38

Operator BDAL@DE  
Instrument / Ser# micrOTOF 10248

## Acquisition Parameter

|             |            |                      |          |                  |           |
|-------------|------------|----------------------|----------|------------------|-----------|
| Source Type | ESI        | Ion Polarity         | Positive | Set Nebulizer    | 1.0 Bar   |
| Focus       | Not active |                      |          | Set Dry Heater   | 200 °C    |
| Scan Begin  | 50 m/z     | Set Capillary        | 4500 V   | Set Dry Gas      | 4.0 l/min |
| Scan End    | 1600 m/z   | Set End Plate Offset | -500 V   | Set Divert Valve | Waste     |

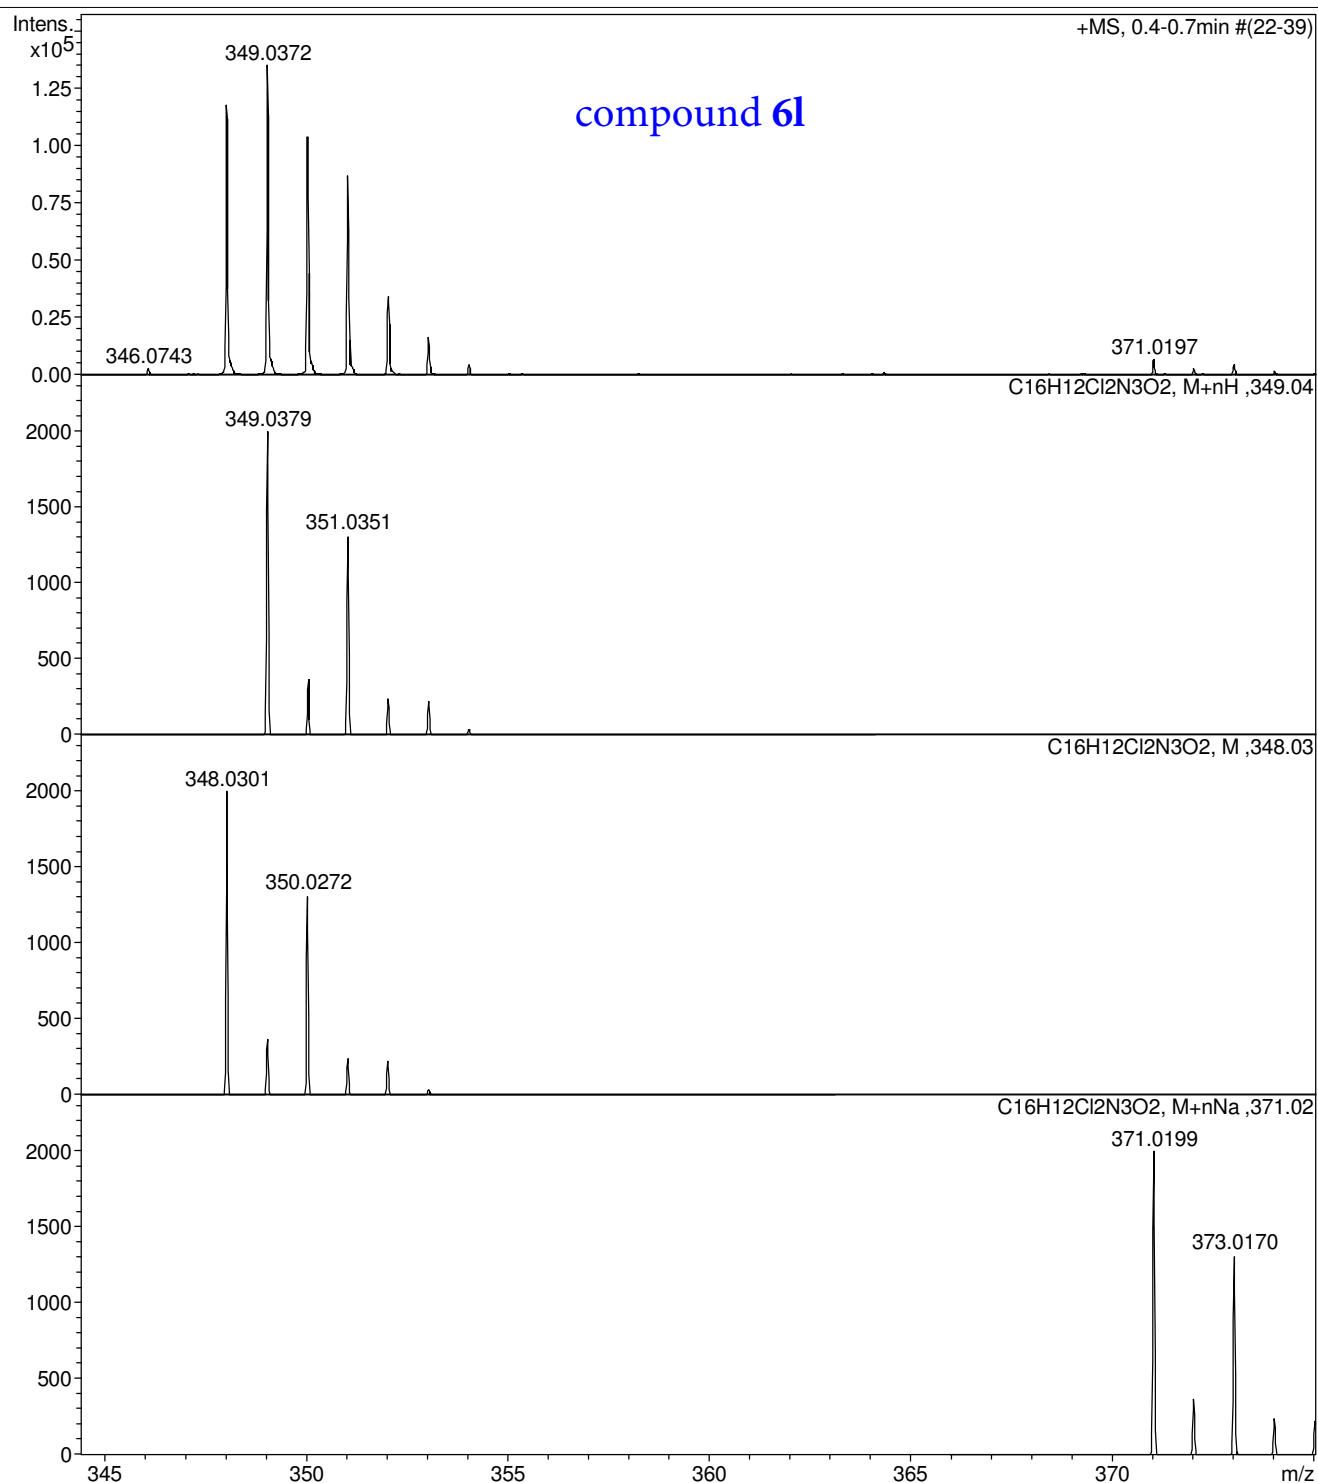

# Display Report

## Analysis Info

Analysis Name D:\Data\Kolotyrkina\2021\Epishina\1214001.d  
Method tune\_50-1600.m  
Sample Name /PVYU 1099-C  
Comment C16H12Cl2N3O2 mH 335.0348, calibrant added

Acquisition Date 14.12.2021 10:18:56

Operator BDAL@DE  
Instrument / Ser# micrOTOF 10248

## Acquisition Parameter

|             |            |                      |          |                  |           |
|-------------|------------|----------------------|----------|------------------|-----------|
| Source Type | ESI        | Ion Polarity         | Positive | Set Nebulizer    | 1.0 Bar   |
| Focus       | Not active |                      |          | Set Dry Heater   | 200 °C    |
| Scan Begin  | 50 m/z     | Set Capillary        | 4500 V   | Set Dry Gas      | 4.0 l/min |
| Scan End    | 1600 m/z   | Set End Plate Offset | -500 V   | Set Divert Valve | Waste     |

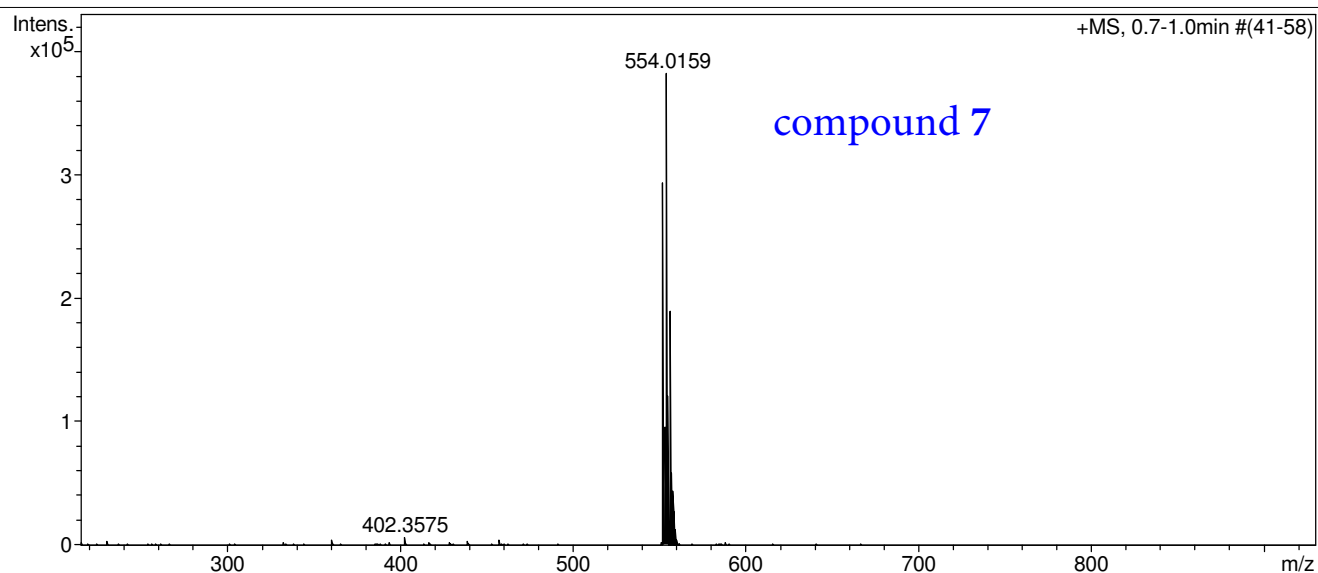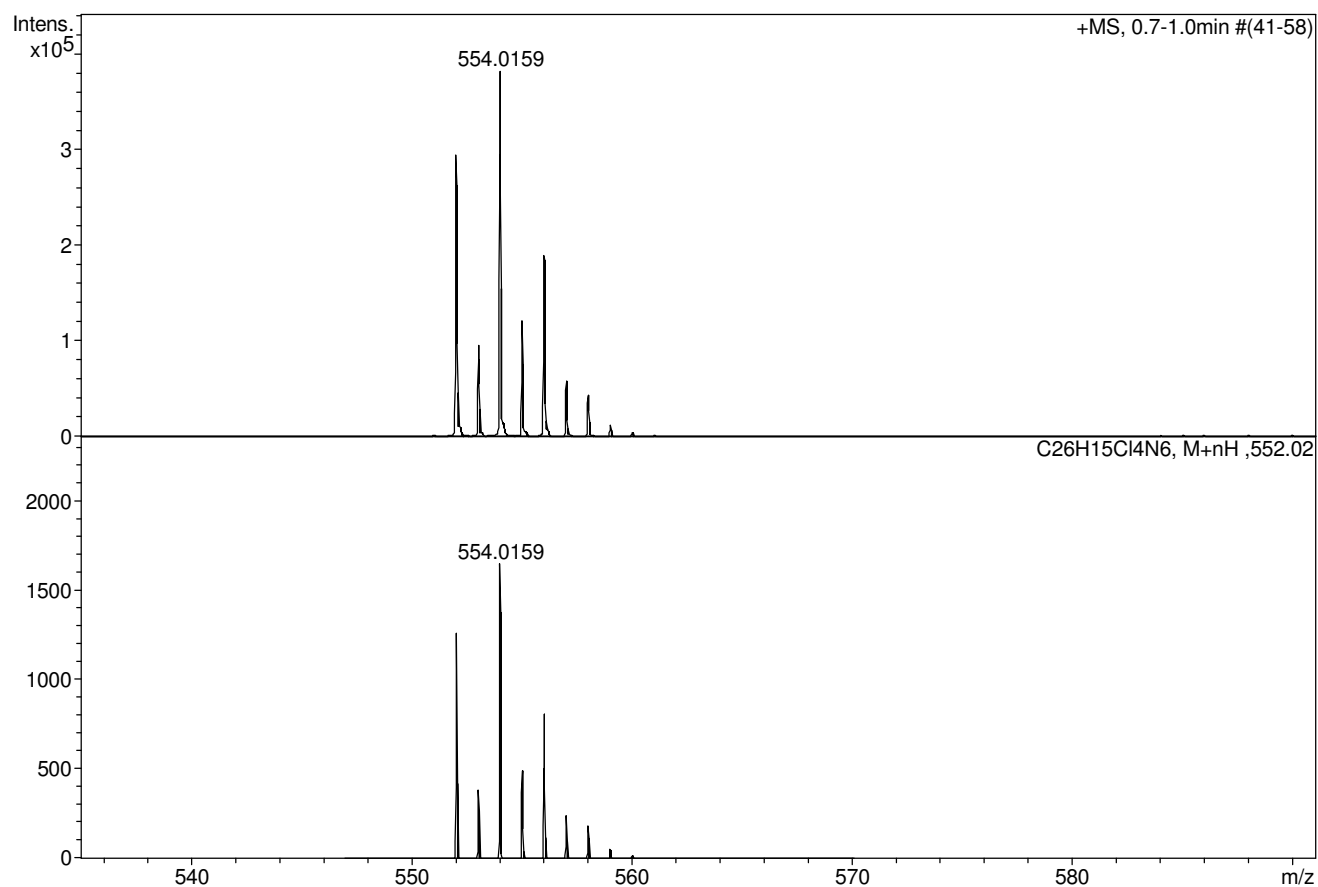

# Display Report

## Analysis Info

Analysis Name D:\Data\Kolotyrkina\2021\Epishina\1214001.d  
Method tune\_50-1600.m  
Sample Name /PVYU 1099-C  
Comment C16H13Cl2N3O2 mH 334.0348, calibrant added

Acquisition Date 14.12.2021 10:18:56

Operator BDAL@DE  
Instrument / Ser# micrOTOF 10248

## Acquisition Parameter

|             |            |                      |          |                  |           |
|-------------|------------|----------------------|----------|------------------|-----------|
| Source Type | ESI        | Ion Polarity         | Positive | Set Nebulizer    | 1.0 Bar   |
| Focus       | Not active |                      |          | Set Dry Heater   | 200 °C    |
| Scan Begin  | 50 m/z     | Set Capillary        | 4500 V   | Set Dry Gas      | 4.0 l/min |
| Scan End    | 1600 m/z   | Set End Plate Offset | -500 V   | Set Divert Valve | Waste     |

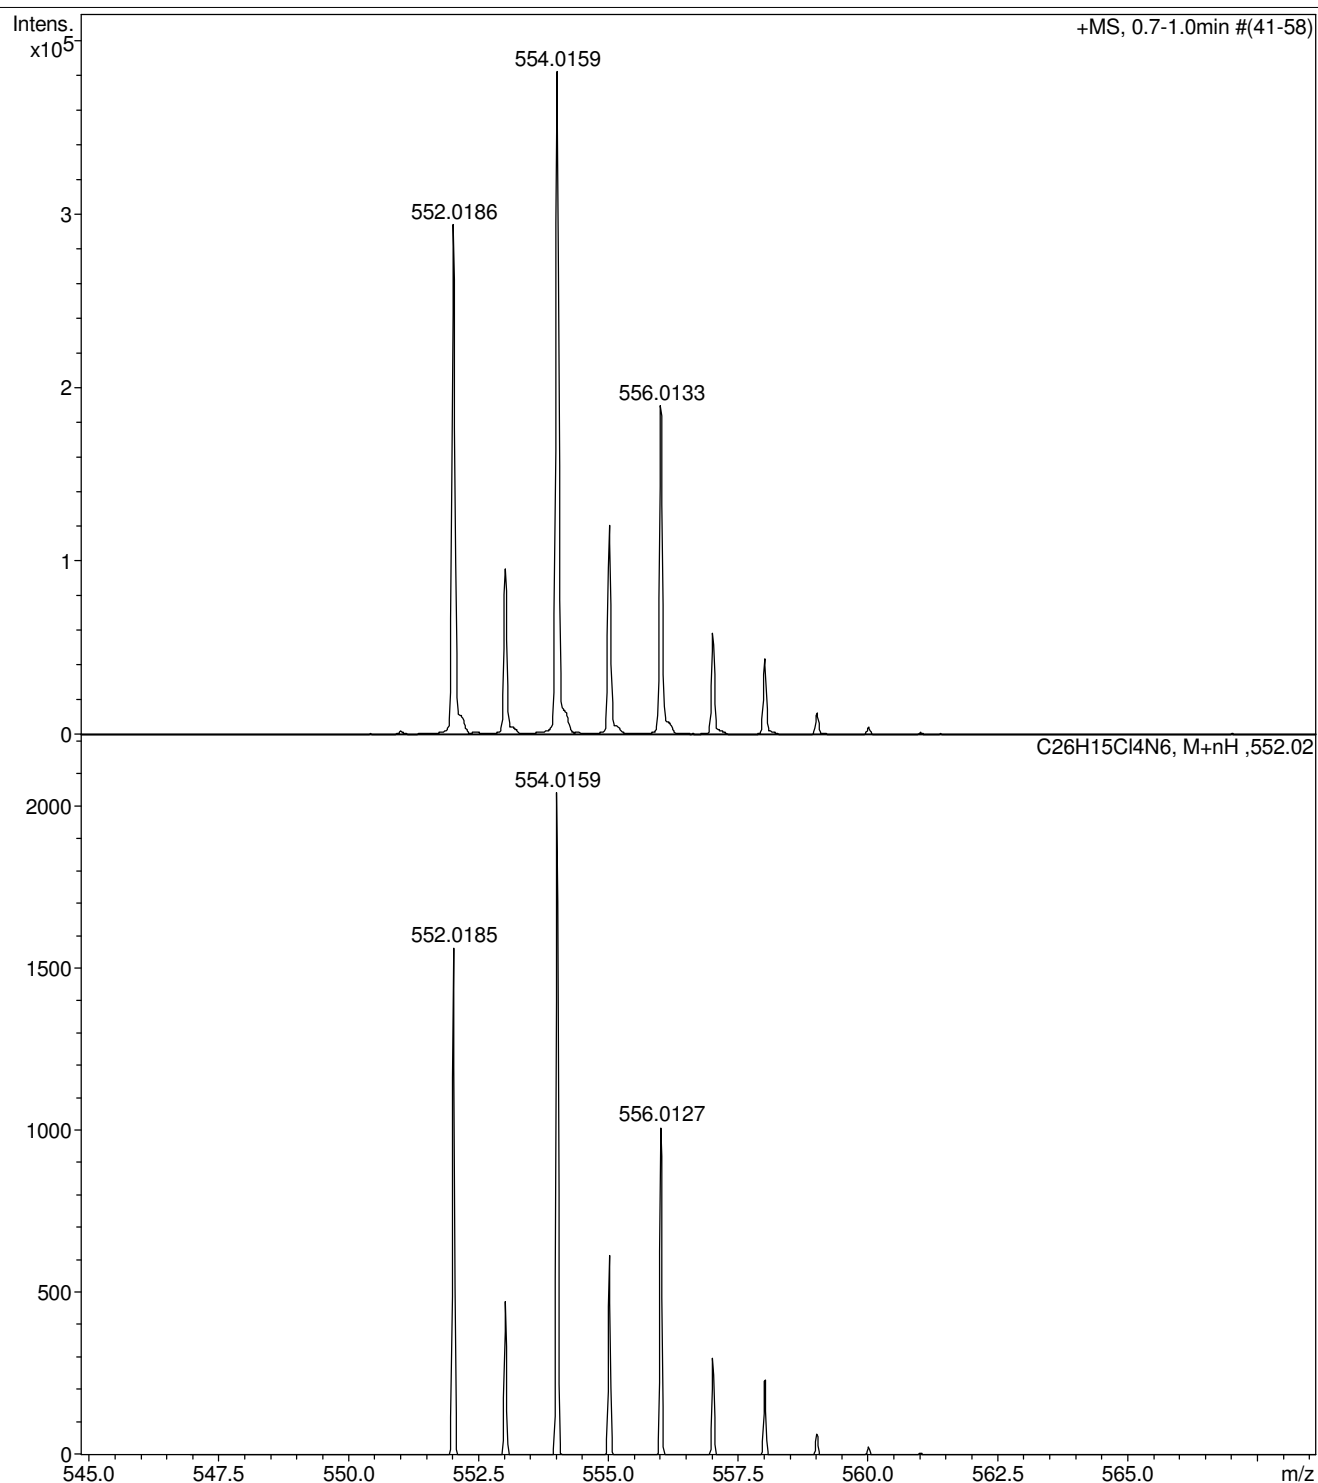

Supplement: s1 [file s1]
